# Supplementary material for: Transcriptome Analysis of the Oil-Rich Tea Plant, Camellia oleifera, Reveals Candidate Genes Related to Lipid Metabolism
Source: PLoS One. 2014 Aug 19;9(8):e104150. doi: 10.1371/journal.pone.0104150 (PMC4138098; doi:10.1371/journal.pone.0104150)
Supplement: Table S1 — Top BLAST hits from NR, UniRef90, TAIR10 and KOG protein databases. BLAST results for all the transcripts with E-value≤10−5 are shown. (XLS) [file pone.0104150.s002.xls]

## Sheet: NR
Unigene ID	Length	Hit protein	Description	Score	E-value
ColeIsotig12890	205	XP_002311547	predicted protein [Populus trichocarpa] predicted protein [Populus trichocarpa]	55.1	8e-06
ColeIsotig12896	201	CAN80126	hypothetical protein VITISV_013417 [Vitis vinifera]	100	2e-19
ColeIsotig12898	200	XP_002305651	f-box family protein [Populus trichocarpa] f-box family protein [Populus trichocarpa]	106	2e-21
ColeIsotig12901	195	D1MI46	RecName: Full=Geraniol 8-hydroxylase; AltName: Full=Cytochrome P450 76B10; AltName: Full=Geraniol 10-hydroxylase; Short=SmG10H geraniol 10-hydroxylase [Swertia mussotii]	99.4	4e-19
ColeIsotig12910	187	CAO02550	putative ribosomal protein S3 [Vigna unguiculata]	86.3	3e-15
ColeIsotig12913	185	ACT10283	dehydrin [Camellia sinensis]	87.8	1e-15
ColeIsotig12916	186	AFK42857	unknown [Lotus japonicus]	69.3	4e-10
ColeIsotig12917	184	EPS74704	hypothetical protein M569_00079, partial [Genlisea aurea]	58.9	5e-07
ColeIsotig12920	180	XP_004230311	PREDICTED: uncharacterized protein LOC101249962 [Solanum lycopersicum]	86.3	4e-17
ColeIsotig12934	168	AAT40504	Polyprotein, putative [Solanum demissum]	49.3	9e-11
ColeIsotig12936	169	XP_002520879	ATP binding protein, putative [Ricinus communis] ATP binding protein, putative [Ricinus communis]	76.6	3e-12
ColeIsotig12937	167	YP_173374	hypothetical protein NitaMp027 [Nicotiana tabacum] hypothetical protein NitaMp164 [Nicotiana tabacum] hypothetical protein (mitochondrion) [Nicotiana tabacum] hypothetical protein (mitochondrion) [Nicotiana tabacum]	108	8e-22
ColeIsotig12952	155	XP_003637074	Cell wall-associated hydrolase, partial [Medicago truncatula] Cell wall-associated hydrolase, partial [Medicago truncatula]	55.8	5e-06
ColeIsotig12972	124	EOA26449	hypothetical protein CARUB_v10022495mg [Capsella rubella]	79	5e-13
ColeIsotig12974	120	AAX64155	hypothetical protein SCH_0249 [Salmonella enterica subsp. enterica serovar Choleraesuis str. SC-B67]	89	5e-16
ColeSingleton10406	121	XP_004307144	PREDICTED: acetolactate synthase 1, chloroplastic-like [Fragaria vesca subsp. vesca]	84.3	1e-14
ColeSingleton10407	323	XP_002265999	PREDICTED: GDSL esterase/lipase At4g28780 [Vitis vinifera] unnamed protein product [Vitis vinifera]	100	1e-19
ColeSingleton10408	284	XP_004238232	PREDICTED: lysophosphatidylcholine acyltransferase 2-like isoform 1 [Solanum lycopersicum]	74.7	9e-12
ColeSingleton10409	397	XP_003536537	PREDICTED: thermospermine synthase ACAULIS5-like [Glycine max]	108	1e-41
ColeSingleton10411	293	EPS65359	hypothetical protein M569_09417, partial [Genlisea aurea]	55.1	8e-06
ColeSingleton10416	487	EMJ09491	hypothetical protein PRUPE_ppa003364mg [Prunus persica]	205	2e-67
ColeSingleton10417	444	EME88643	hypothetical protein MYCFIDRAFT_181313 [Pseudocercospora fijiensis CIRAD86]	219	3e-55
ColeSingleton10420	334	XP_002268078	PREDICTED: tripeptidyl-peptidase 2 [Vitis vinifera]	185	5e-45
ColeSingleton10422	173	XP_003594509	Beta-D-glucosidase [Medicago truncatula] Beta-D-glucosidase [Medicago truncatula]	42	2e-07
ColeSingleton10427	475	XP_002265273	PREDICTED: uncharacterized protein LOC100249702 [Vitis vinifera]	207	1e-51
ColeSingleton10432	522	XP_004245986	PREDICTED: probable calcium-binding protein CML17-like isoform 1 [Solanum lycopersicum] PREDICTED: probable calcium-binding protein CML17-like isoform 2 [Solanum lycopersicum] PREDICTED: probable calcium-binding protein CML17-like isoform 3 [Solanum lycopersicum] PREDICTED: probable calcium-binding protein CML17-like isoform 4 [Solanum lycopersicum]	251	7e-65
ColeSingleton10442	450	CBI18055	unnamed protein product [Vitis vinifera]	108	5e-22
ColeSingleton10443	353	EMJ26945	hypothetical protein PRUPE_ppa004350mg [Prunus persica]	211	9e-53
ColeSingleton10445	243	XP_004236645	PREDICTED: uncharacterized protein LOC101254681 [Solanum lycopersicum]	115	7e-28
ColeSingleton10447	522	CAN68609	hypothetical protein VITISV_012924 [Vitis vinifera]	52	8e-06
ColeSingleton10449	471	XP_002516237	beta-galactosidase, putative [Ricinus communis] beta-galactosidase, putative [Ricinus communis]	216	3e-54
ColeSingleton10452	243	EOY19314	Calcium dependent protein kinase 1 [Theobroma cacao]	99.4	4e-19
ColeSingleton10454	491	EHY57577	enolase [Exophiala dermatitidis NIH/UT8656]	98.6	2e-35
ColeSingleton10456	241	XP_002280960	PREDICTED: DNA topoisomerase 1-like [Vitis vinifera]	66.2	3e-09
ColeSingleton10459	442	XP_002269994	PREDICTED: serine/threonine-protein kinase KIPK-like [Vitis vinifera]	117	3e-26
ColeSingleton10461	207	XP_003634868	PREDICTED: probable LRR receptor-like serine/threonine-protein kinase At4g08850-like [Vitis vinifera]	71.2	1e-10
ColeSingleton10464	218	XP_004238689	PREDICTED: serine/threonine-protein kinase PBS1-like [Solanum lycopersicum]	50.1	1e-09
ColeSingleton10465	394	XP_002268838	PREDICTED: cyclin-T1-5-like isoform 1 [Vitis vinifera]	154	7e-36
ColeSingleton10467	415	XP_002270200	PREDICTED: neutral alpha-glucosidase AB-like [Vitis vinifera]	155	2e-47
ColeSingleton10468	349	EMJ09379	hypothetical protein PRUPE_ppa001081mg [Prunus persica]	117	1e-24
ColeSingleton10469	357	CBI23992	unnamed protein product [Vitis vinifera]	60.8	1e-28
ColeSingleton10471	492	XP_002276467	PREDICTED: DEAD-box ATP-dependent RNA helicase 41-like [Vitis vinifera]	142	4e-32
ColeSingleton10472	301	XP_002281466	PREDICTED: 66 kDa stress protein [Vitis vinifera] unnamed protein product [Vitis vinifera]	150	1e-34
ColeSingleton10473	390	XP_004231135	PREDICTED: E3 ubiquitin-protein ligase ATL4-like [Solanum lycopersicum]	118	8e-25
ColeSingleton10474	316	CBI19860	unnamed protein product [Vitis vinifera]	124	1e-26
ColeSingleton10476	372	EOY24701	Heavy metal atpase 5 [Theobroma cacao]	222	4e-56
ColeSingleton10477	351	EFZ13919	hypothetical protein SINV_01896 [Solenopsis invicta]	55.8	5e-06
ColeSingleton10479	497	XP_002276062	PREDICTED: leucine-rich repeat protein SHOC-2 [Vitis vinifera] unnamed protein product [Vitis vinifera]	254	3e-66
ColeSingleton10480	410	XP_002312022	predicted protein [Populus trichocarpa] predicted protein [Populus trichocarpa]	222	1e-58
ColeSingleton10481	182	XP_002267536	PREDICTED: uncharacterized protein LOC100253093 [Vitis vinifera] unnamed protein product [Vitis vinifera]	68.2	9e-10
ColeSingleton10483	426	EOY23099	Uncharacterized protein TCM_015097 [Theobroma cacao]	62.8	4e-08
ColeSingleton10490	439	XP_003634310	PREDICTED: uncharacterized protein LOC100262165 isoform 2 [Vitis vinifera]	166	3e-39
ColeSingleton10493	423	XP_004297083	PREDICTED: squamosa promoter-binding-like protein 1-like [Fragaria vesca subsp. vesca]	141	7e-34
ColeSingleton10497	253	EOY31350	Enhancer of polycomb-like transcription factor protein, putative isoform 5 [Theobroma cacao]	80.1	2e-13
ColeSingleton10499	282	XP_004241426	PREDICTED: uncharacterized protein LOC101257082 [Solanum lycopersicum]	114	1e-23
ColeSingleton10502	444	EOY11517	RNA-binding family protein isoform 4 [Theobroma cacao]	199	3e-49
ColeSingleton10504	269	EMJ26899	hypothetical protein PRUPE_ppa006402mg [Prunus persica]	114	1e-23
ColeSingleton10513	391	XP_002514582	inositol or phosphatidylinositol kinase, putative [Ricinus communis] inositol or phosphatidylinositol kinase, putative [Ricinus communis]	108	6e-22
ColeSingleton10514	395	XP_001791011	hypothetical protein SNOG_00321 [Phaeosphaeria nodorum SN15] hypothetical protein SNOG_00321 [Phaeosphaeria nodorum SN15]	116	3e-24
ColeSingleton10517	514	EKU21481	hypothetical protein NGA_0377400 [Nannochloropsis gaditana CCMP526]	72.4	5e-11
ColeSingleton10518	158	XP_004237978	PREDICTED: chaperone protein DnaJ 1-like isoform 1 [Solanum lycopersicum] PREDICTED: chaperone protein DnaJ 1-like isoform 2 [Solanum lycopersicum]	59.3	4e-07
ColeSingleton10522	232	XP_002264040	PREDICTED: uncharacterized protein LOC100267845 [Vitis vinifera] unnamed protein product [Vitis vinifera]	76.3	3e-12
ColeSingleton10523	490	XP_003834645	hypothetical protein LEMA_P067880.1 [Leptosphaeria maculans JN3] hypothetical protein LEMA_P067880.1 [Leptosphaeria maculans JN3]	171	6e-41
ColeSingleton10527	120	AFZ93522	inosine-5'-monophosphate dehydrogenase [Camellia sinensis]	79.3	4e-13
ColeSingleton10528	267	XP_004230782	PREDICTED: B3 domain-containing protein At5g42700-like [Solanum lycopersicum]	55.8	6e-10
ColeSingleton10532	351	XP_003597713	hypothetical protein MTR_2g101480 [Medicago truncatula] hypothetical protein MTR_2g101480 [Medicago truncatula]	189	8e-50
ColeSingleton10533	475	EMJ02147	hypothetical protein PRUPE_ppa000049mg [Prunus persica]	196	3e-48
ColeSingleton10535	256	EMJ03562	hypothetical protein PRUPE_ppa009206mg [Prunus persica]	166	2e-39
ColeSingleton10536	470	XP_002279613	PREDICTED: formin-like protein 6-like [Vitis vinifera]	118	2e-27
ColeSingleton10538	243	NP_001266229	Hop-interacting protein THI109 [Solanum lycopersicum] Hop-interacting protein THI109 [Solanum lycopersicum]	99	5e-19
ColeSingleton10541	420	XP_002284543	PREDICTED: auxin response factor 2 [Vitis vinifera] unnamed protein product [Vitis vinifera]	156	3e-36
ColeSingleton10542	384	CBI32840	unnamed protein product [Vitis vinifera]	130	1e-28
ColeSingleton10550	486	XP_002267012	PREDICTED: uncharacterized protein LOC100267290 [Vitis vinifera]	185	5e-45
ColeSingleton10555	302	XP_004232837	PREDICTED: splicing factor 3B subunit 2-like [Solanum lycopersicum]	84.7	9e-15
ColeSingleton10559	137	XP_002511832	r2r3-myb transcription factor, putative [Ricinus communis] r2r3-myb transcription factor, putative [Ricinus communis]	57.8	1e-06
ColeSingleton10561	469	AEI72267	early flowering 5 protein [Citrus trifoliata]	101	8e-32
ColeSingleton10562	214	XP_002523633	Myosin-9, putative [Ricinus communis] Myosin-9, putative [Ricinus communis]	68.2	9e-10
ColeSingleton10569	260	XP_002273221	PREDICTED: U-box domain-containing protein 43 [Vitis vinifera]	147	2e-33
ColeSingleton10570	309	EOY14387	P-loop containing nucleoside triphosphate hydrolases superfamily protein isoform 1 [Theobroma cacao] P-loop containing nucleoside triphosphate hydrolases superfamily protein isoform 1 [Theobroma cacao] P-loop containing nucleoside triphosphate hydrolases superfamily protein isoform 1 [Theobroma cacao] P-loop containing nucleoside triphosphate hydrolases superfamily protein isoform 1 [Theobroma ca…	77.8	1e-12
ColeSingleton10571	475	EMJ05010	hypothetical protein PRUPE_ppa001232mg [Prunus persica]	184	7e-45
ColeSingleton10572	446	XP_002278410	PREDICTED: graves disease carrier protein isoform 1 [Vitis vinifera] unnamed protein product [Vitis vinifera]	194	6e-53
ColeSingleton10575	456	ABM53471	plastid 3-keto-acyl-ACP synthase I [Helianthus annuus]	63.5	1e-08
ColeSingleton10576	432	XP_002524776	breast carcinoma amplified sequence, putative [Ricinus communis] breast carcinoma amplified sequence, putative [Ricinus communis]	64.7	1e-08
ColeSingleton10580	415	XP_003552643	PREDICTED: N-alpha-acetyltransferase 30-like [Glycine max]	252	3e-65
ColeSingleton10582	331	AGB05599	fructose-bisphosphate aldolase 2 [Camellia oleifera]	104	9e-21
ColeSingleton10583	522	CAN68148	hypothetical protein VITISV_035665 [Vitis vinifera]	105	5e-21
ColeSingleton10584	475	CAN66510	hypothetical protein VITISV_003620 [Vitis vinifera]	62	6e-08
ColeSingleton10585	370	CAN78121	hypothetical protein VITISV_041546 [Vitis vinifera]	52	4e-09
ColeSingleton10587	299	XP_002265097	PREDICTED: WPP domain-interacting protein 2-like [Vitis vinifera]	148	5e-34
ColeSingleton10589	384	XP_002263743	PREDICTED: CDT1-like protein a, chloroplastic-like [Vitis vinifera]	63.2	3e-08
ColeSingleton10591	421	XP_004250203	PREDICTED: NADH dehydrogenase [ubiquinone] iron-sulfur protein 1, mitochondrial-like [Solanum lycopersicum]	154	9e-67
ColeSingleton10612	277	EMJ12067	hypothetical protein PRUPE_ppa003353mg [Prunus persica]	127	2e-27
ColeSingleton10615	464	XP_004251276	PREDICTED: DDB1- and CUL4-associated factor 8-like [Solanum lycopersicum]	127	9e-28
ColeSingleton10616	315	XP_002282805	PREDICTED: uncharacterized protein LOC100244706 [Vitis vinifera] unnamed protein product [Vitis vinifera]	144	7e-33
ColeSingleton10621	344	EMJ05139	hypothetical protein PRUPE_ppa017433mg [Prunus persica]	62	2e-18
ColeSingleton10622	434	XP_002281396	PREDICTED: uncharacterized protein LOC100262175 [Vitis vinifera]	187	1e-45
ColeSingleton10623	521	XP_002284149	PREDICTED: abhydrolase domain-containing protein FAM108B1 [Vitis vinifera] hypothetical protein VITISV_029334 [Vitis vinifera]	281	1e-81
ColeSingleton10624	523	CBI32712	unnamed protein product [Vitis vinifera]	144	7e-33
ColeSingleton10629	398	EOA36791	hypothetical protein CARUB_v10008182mg [Capsella rubella]	132	4e-29
ColeSingleton10633	492	XP_004299187	PREDICTED: callose synthase 10-like [Fragaria vesca subsp. vesca]	301	4e-80
ColeSingleton10637	448	EOY34568	Glutaredoxin family protein, putative [Theobroma cacao]	221	6e-56
ColeSingleton10641	284	CAN81539	hypothetical protein VITISV_026340 [Vitis vinifera]	92.4	6e-22
ColeSingleton10642	445	EMJ25289	hypothetical protein PRUPE_ppa015515mg [Prunus persica]	81.6	8e-14
ColeSingleton10650	420	EMJ00432	hypothetical protein PRUPE_ppa022146mg, partial [Prunus persica]	115	7e-24
ColeSingleton10651	364	EEC75210	hypothetical protein OsI_11473 [Oryza sativa Indica Group]	124	4e-44
ColeSingleton10653	288	EMJ24500	hypothetical protein PRUPE_ppa007293mg [Prunus persica]	69.3	4e-10
ColeSingleton10655	503	XP_003626481	Serine/threonine protein phosphatase PP1 [Medicago truncatula] Serine/threonine protein phosphatase PP1 [Medicago truncatula]	155	3e-36
ColeSingleton10658	394	CBI19401	unnamed protein product [Vitis vinifera]	149	3e-36
ColeSingleton10659	462	XP_003530251	PREDICTED: unknown protein DS12 from 2D-PAGE of leaf, chloroplastic-like [Glycine max]	126	2e-27
ColeSingleton10661	434	CBI30571	unnamed protein product [Vitis vinifera]	103	2e-20
ColeSingleton10665	414	EOY13010	Kinase superfamily protein [Theobroma cacao]	184	5e-67
ColeSingleton10666	371	XP_004240640	PREDICTED: putative E3 ubiquitin-protein ligase RF298-like [Solanum lycopersicum]	178	5e-43
ColeSingleton10670	443	XP_003521187	PREDICTED: NAD-dependent malic enzyme 59 kDa isoform, mitochondrial-like [Glycine max]	244	6e-72
ColeSingleton10671	405	XP_003667366	hypothetical protein MYCTH_84362 [Myceliophthora thermophila ATCC 42464] hypothetical protein MYCTH_84362 [Myceliophthora thermophila ATCC 42464]	46.2	2e-07
ColeSingleton10676	226	EMJ09586	hypothetical protein PRUPE_ppa000306mg [Prunus persica]	148	7e-34
ColeSingleton10677	231	EOY18865	Galactose oxidase/kelch repeat superfamily protein isoform 2 [Theobroma cacao] Galactose oxidase/kelch repeat superfamily protein isoform 2 [Theobroma cacao]	76.3	3e-12
ColeSingleton10680	290	XP_002311663	predicted protein [Populus trichocarpa] predicted protein [Populus trichocarpa]	68.2	1e-17
ColeSingleton10683	464	XP_002263194	PREDICTED: uncharacterized protein LOC100250759 [Vitis vinifera]	59.3	4e-07
ColeSingleton10684	464	XP_002321140	predicted protein [Populus trichocarpa] predicted protein [Populus trichocarpa]	164	7e-39
ColeSingleton10685	524	EOY21576	Endosomal targeting BRO1-like domain-containing protein isoform 2 [Theobroma cacao]	132	3e-29
ColeSingleton10687	384	XP_002265911	PREDICTED: cytochrome P450 77A3 [Vitis vinifera] unnamed protein product [Vitis vinifera]	107	4e-33
ColeSingleton10691	446	XP_004148492	PREDICTED: protein ABCI7, chloroplastic-like [Cucumis sativus] PREDICTED: protein ABCI7, chloroplastic-like [Cucumis sativus]	57.8	2e-09
ColeSingleton10697	316	XP_004291761	PREDICTED: transcription factor bHLH106-like [Fragaria vesca subsp. vesca]	92	6e-17
ColeSingleton10698	480	EFY96064	hypothetical protein MAA_08556 [Metarhizium anisopliae ARSEF 23]	91.3	1e-16
ColeSingleton10700	448	XP_002307488	predicted protein [Populus trichocarpa] predicted protein [Populus trichocarpa]	124	3e-34
ColeSingleton10703	247	XP_002266323	PREDICTED: protein WUSCHEL [Vitis vinifera] unnamed protein product [Vitis vinifera]	76.6	3e-12
ColeSingleton10705	292	XP_002304680	predicted protein [Populus trichocarpa] predicted protein [Populus trichocarpa]	78.2	9e-13
ColeSingleton10706	472	XP_004243507	PREDICTED: uncharacterized protein LOC101266045 [Solanum lycopersicum]	138	5e-31
ColeSingleton10708	370	XP_002272699	PREDICTED: uncharacterized protein LOC100240870 [Vitis vinifera] unnamed protein product [Vitis vinifera]	129	3e-36
ColeSingleton10711	278	XP_002521433	XPA-binding protein, putative [Ricinus communis] XPA-binding protein, putative [Ricinus communis]	158	7e-37
ColeSingleton10714	171	XP_002302951	predicted protein [Populus trichocarpa] predicted protein [Populus trichocarpa]	95.9	4e-18
ColeSingleton10717	443	XP_002270511	PREDICTED: uncharacterized protein LOC100244545 [Vitis vinifera]	130	2e-28
ColeSingleton10719	473	XP_004231046	PREDICTED: urease accessory protein UreH-like [Solanum lycopersicum]	236	3e-69
ColeSingleton10730	389	XP_004299125	PREDICTED: uncharacterized protein LOC101307887 [Fragaria vesca subsp. vesca]	64.7	1e-08
ColeSingleton10731	463	XP_002276395	PREDICTED: uncharacterized protein LOC100244907 [Vitis vinifera] unnamed protein product [Vitis vinifera]	107	1e-30
ColeSingleton10734	360	XP_004240506	PREDICTED: bet1-like SNARE 1-1-like isoform 3 [Solanum lycopersicum]	137	2e-30
ColeSingleton10736	475	XP_003554185	PREDICTED: chaperone protein dnaJ 6-like [Glycine max]	249	2e-64
ColeSingleton10737	376	XP_004304672	PREDICTED: GDSL esterase/lipase At5g14450-like [Fragaria vesca subsp. vesca]	180	2e-43
ColeSingleton10740	184	XP_002515436	nucleic acid binding protein, putative [Ricinus communis] nucleic acid binding protein, putative [Ricinus communis]	69.3	4e-10
ColeSingleton10742	320	XP_004249758	PREDICTED: DNA-directed RNA polymerase I subunit rpa1-like [Solanum lycopersicum]	112	4e-23
ColeSingleton10743	414	ACH87169	MYB transcription factor [Camellia sinensis]	81.6	8e-14
ColeSingleton10744	436	XP_003519400	PREDICTED: uncharacterized protein LOC100785042 [Glycine max]	60.5	2e-10
ColeSingleton10747	411	XP_003559565	PREDICTED: uncharacterized protein LOC100823517 [Brachypodium distachyon]	89	5e-16
ColeSingleton10748	213	EPS61089	hypothetical protein M569_13711, partial [Genlisea aurea]	55.1	8e-06
ColeSingleton10749	498	AEE69008	cinnamyl alcohol dehydrogenase 3 [Camellia sinensis]	171	1e-40
ColeSingleton10756	334	XP_004241482	PREDICTED: alcohol dehydrogenase-like 6-like [Solanum lycopersicum]	107	2e-36
ColeSingleton10758	217	XP_004137596	PREDICTED: transcription factor UNE10-like [Cucumis sativus] PREDICTED: transcription factor UNE10-like [Cucumis sativus]	68.2	9e-10
ColeSingleton10759	140	AGH32919	ketoacyl-ACP reductase [Camellia chekiangoleosa]	55.8	3e-10
ColeSingleton10760	467	EOX99439	ATP binding protein, putative [Theobroma cacao]	88.2	9e-16
ColeSingleton10762	475	EOY15413	Uncharacterized protein isoform 1 [Theobroma cacao]	81.6	2e-21
ColeSingleton10764	446	EMJ12918	hypothetical protein PRUPE_ppa009395mg [Prunus persica] hypothetical protein PRUPE_ppa009395mg [Prunus persica]	203	1e-50
ColeSingleton10765	340	AAB21535	GmPK1=protein kinase [Glycine max L.=soybeans, Peptide, 124 aa]	120	1e-35
ColeSingleton10767	500	XP_002511659	Phosphatidate cytidylyltransferase, putative [Ricinus communis] Phosphatidate cytidylyltransferase, putative [Ricinus communis]	107	4e-29
ColeSingleton10768	374	EMJ10325	hypothetical protein PRUPE_ppa005525mg [Prunus persica]	77	2e-12
ColeSingleton10772	257	XP_004510111	PREDICTED: malate dehydrogenase, cytoplasmic-like [Cicer arietinum]	157	9e-37
ColeSingleton10773	231	XP_004500138	PREDICTED: microtubule-associated protein TORTIFOLIA1-like [Cicer arietinum]	81.6	8e-14
ColeSingleton10775	397	XP_004240568	PREDICTED: receptor-like protein kinase ANXUR1-like [Solanum lycopersicum]	196	3e-48
ColeSingleton10776	280	CBI26373	unnamed protein product [Vitis vinifera]	102	3e-20
ColeSingleton10785	503	EOA82947	hypothetical protein SETTUDRAFT_34467 [Setosphaeria turcica Et28A]	92	5e-35
ColeSingleton10786	406	AGJ83729	gag-pol polyprotein, partial [Caragana korshinskii]	46.6	1e-07
ColeSingleton10787	347	XP_002520873	ATP binding protein, putative [Ricinus communis] ATP binding protein, putative [Ricinus communis]	140	2e-31
ColeSingleton10788	534	EMJ06375	hypothetical protein PRUPE_ppa005581mg [Prunus persica]	169	3e-40
ColeSingleton10789	457	XP_002285788	PREDICTED: 5'-adenylylsulfate reductase-like 4 isoform 1 [Vitis vinifera]	106	3e-21
ColeSingleton10792	213	XP_002522271	BRASSINAZOLE-RESISTANT 2 protein, putative [Ricinus communis] BRASSINAZOLE-RESISTANT 2 protein, putative [Ricinus communis]	71.2	1e-10
ColeSingleton10794	439	XP_004149656	PREDICTED: CBL-interacting serine/threonine-protein kinase 3-like [Cucumis sativus]	243	2e-62
ColeSingleton10795	406	EOY31492	Calcium-binding EF-hand family protein [Theobroma cacao]	221	6e-56
ColeSingleton10797	456	XP_002263382	PREDICTED: beta-galactosidase 3-like [Vitis vinifera] unnamed protein product [Vitis vinifera]	134	1e-29
ColeSingleton10798	405	XP_004250972	PREDICTED: ribosome production factor 1-like [Solanum lycopersicum]	77.4	1e-12
ColeSingleton10801	484	EOY29438	TRAF-like family protein [Theobroma cacao]	215	4e-75
ColeSingleton10802	429	XP_002274572	PREDICTED: uncharacterized protein LOC100260424 [Vitis vinifera]	93.6	1e-44
ColeSingleton10803	387	EMJ14145	hypothetical protein PRUPE_ppa022011mg [Prunus persica]	45.4	3e-09
ColeSingleton10806	281	EMJ20108	hypothetical protein PRUPE_ppa000626mg [Prunus persica]	153	2e-35
ColeSingleton10809	513	CDB39267	putative uncharacterized protein [Azospirillum sp. CAG:260]	152	5e-35
ColeSingleton10814	387	EPS69207	hypothetical protein M569_05561, partial [Genlisea aurea]	82.8	4e-14
ColeSingleton10824	503	ACH87169	MYB transcription factor [Camellia sinensis]	64.7	1e-08
ColeSingleton10828	440	XP_002265269	PREDICTED: uncharacterized protein LOC100243354 [Vitis vinifera]	211	7e-53
ColeSingleton10831	496	XP_004236518	PREDICTED: protein FAM135B-like [Solanum lycopersicum]	108	5e-22
ColeSingleton10834	417	XP_003632944	PREDICTED: 5'-adenylylsulfate reductase 3, chloroplastic-like isoform 2 [Vitis vinifera]	273	2e-71
ColeSingleton10839	198	XP_002279580	PREDICTED: probable leucine-rich repeat receptor-like protein kinase At1g68400-like [Vitis vinifera]	68.9	5e-10
ColeSingleton10843	259	gi|414588871|tpg|DAA39442.1|	TPA: Ras protein ARA-3 [Zea mays]	60.5	2e-07
ColeSingleton10847	175	CBI18962	unnamed protein product [Vitis vinifera]	84	2e-14
ColeSingleton10848	441	EOY32998	Uncharacterized protein isoform 2, partial [Theobroma cacao]	89	5e-16
ColeSingleton10855	470	EOX91750	Uncharacterized protein TCM_000834 [Theobroma cacao]	62.8	4e-08
ColeSingleton10861	290	CAN75947	hypothetical protein VITISV_014170 [Vitis vinifera]	48.5	8e-08
ColeSingleton10870	420	XP_002264310	PREDICTED: uncharacterized protein LOC100246524 [Vitis vinifera]	104	7e-42
ColeSingleton10873	523	CBI30297	unnamed protein product [Vitis vinifera]	177	1e-42
ColeSingleton10885	345	NP_001235886	circadian clock-associated FKF1 [Glycine max] circadian clock-associated FKF1 [Glycine max]	143	2e-32
ColeSingleton10889	136	ABN08628	RNA-directed DNA polymerase (Reverse transcriptase) [Medicago truncatula]	67	2e-09
ColeSingleton10890	344	EOY01329	THO complex subunit 2 isoform 5 [Theobroma cacao]	66.6	3e-09
ColeSingleton10891	480	XP_003549857	PREDICTED: replication factor C subunit 2-like [Glycine max]	160	3e-46
ColeSingleton10894	372	EOX94093	RING/U-box superfamily protein [Theobroma cacao]	79.7	3e-13
ColeSingleton10897	523	XP_002514887	sphingosine phosphate lyase, putative [Ricinus communis] sphingosine phosphate lyase, putative [Ricinus communis]	330	7e-89
ColeSingleton10899	261	EOY18522	Nuclear transcription factor Y subunit B-10 isoform 3 [Theobroma cacao]	57.4	2e-06
ColeSingleton10901	396	CBI34969	unnamed protein product [Vitis vinifera]	123	2e-26
ColeSingleton10906	481	EOY25166	RNA-binding family protein isoform 1 [Theobroma cacao]	114	6e-27
ColeSingleton10911	469	NP_608540	CG2839 [Drosophila melanogaster] CG2839 [Drosophila melanogaster]	79.3	4e-13
ColeSingleton10919	501	XP_004238394	PREDICTED: hippocampus abundant transcript 1 protein-like [Solanum lycopersicum]	195	1e-50
ColeSingleton10922	479	EMD63158	hypothetical protein COCSADRAFT_120278 [Bipolaris sorokiniana ND90Pr]	118	8e-60
ColeSingleton10925	274	XP_002324729	predicted protein [Populus trichocarpa] predicted protein [Populus trichocarpa]	80.1	2e-13
ColeSingleton10929	446	XP_004513853	PREDICTED: uncharacterized protein LOC101508632 [Cicer arietinum]	80.9	1e-22
ColeSingleton10932	497	XP_002265027	PREDICTED: A/G-specific adenine DNA glycosylase [Vitis vinifera]	196	3e-48
ColeSingleton10933	416	XP_003539765	PREDICTED: homeobox-leucine zipper protein REVOLUTA-like isoform 2 [Glycine max]	75.5	6e-12
ColeSingleton10934	448	AAZ08351	ethylene overproducer-like 1 [Solanum lycopersicum]	143	5e-45
ColeSingleton10935	510	CAN60362	hypothetical protein VITISV_024684 [Vitis vinifera]	243	5e-68
ColeSingleton10936	384	EOY09463	RNA-binding family protein isoform 3 [Theobroma cacao]	149	3e-34
ColeSingleton10937	243	NP_001235065	receptor-like protein kinase 1 precursor [Glycine max] receptor-like protein kinase 1 [Glycine max]	137	1e-30
ColeSingleton10941	142	XP_004167403	PREDICTED: kinesin-1-like [Cucumis sativus]	65.9	4e-09
ColeSingleton10942	518	XP_003297620	40S ribosomal protein S25 [Pyrenophora teres f. teres 0-1] hypothetical protein PTT_08092 [Pyrenophora teres f. teres 0-1]	148	7e-34
ColeSingleton10945	397	XP_002279746	PREDICTED: 1-aminocyclopropane-1-carboxylate oxidase 1 [Vitis vinifera]	147	2e-33
ColeSingleton10947	336	XP_004305427	PREDICTED: double-stranded RNA-binding protein 1-like [Fragaria vesca subsp. vesca]	73.2	2e-22
ColeSingleton10948	222	XP_004156556	PREDICTED: LOW QUALITY PROTEIN: nipped-B-like protein-like [Cucumis sativus]	99.4	4e-19
ColeSingleton10949	470	EOY22806	Diacylglycerol kinase family protein, putative isoform 3 [Theobroma cacao]	122	4e-26
ColeSingleton10950	220	EOY27579	Galactosyltransferase family protein isoform 1 [Theobroma cacao]	80.9	3e-26
ColeSingleton10951	444	EMJ11108	hypothetical protein PRUPE_ppa004333mg [Prunus persica]	65.1	8e-09
ColeSingleton10952	437	XP_002278318	PREDICTED: DEAD-box ATP-dependent RNA helicase 3, chloroplastic [Vitis vinifera] unnamed protein product [Vitis vinifera]	270	1e-70
ColeSingleton10954	405	CBI17444	unnamed protein product [Vitis vinifera]	105	3e-57
ColeSingleton10960	412	XP_002281104	PREDICTED: uncharacterized protein LOC100262654 isoform 1 [Vitis vinifera]	118	2e-38
ColeSingleton10963	458	CBI31484	unnamed protein product [Vitis vinifera]	100	4e-34
ColeSingleton10965	495	EOY00046	Octicosapeptide/Phox/Bem1p family protein, putative [Theobroma cacao]	115	3e-42
ColeSingleton10968	239	CAC95126	gag-pol polyprotein [Populus deltoides]	90.1	2e-16
ColeSingleton10970	482	EOY23914	P-loop containing nucleoside triphosphate hydrolases superfamily protein [Theobroma cacao]	154	1e-35
ColeSingleton10971	444	EMJ15171	hypothetical protein PRUPE_ppa013159mg [Prunus persica]	199	3e-49
ColeSingleton10973	413	EMJ22924	hypothetical protein PRUPE_ppb020236mg [Prunus persica]	63.9	2e-08
ColeSingleton10974	344	XP_003633087	PREDICTED: brefeldin A-inhibited guanine nucleotide-exchange protein 1-like [Vitis vinifera]	223	2e-56
ColeSingleton10975	339	XP_002519286	dihydrolipoamide dehydrogenase, putative [Ricinus communis] dihydrolipoamide dehydrogenase, putative [Ricinus communis]	171	7e-41
ColeSingleton10977	250	XP_003549456	PREDICTED: uncharacterized protein LOC100781636 isoform 1 [Glycine max] PREDICTED: uncharacterized protein LOC100781636 isoform 2 [Glycine max]	116	2e-24
ColeSingleton10979	525	EMJ18849	hypothetical protein PRUPE_ppa000576mg [Prunus persica]	263	1e-68
ColeSingleton10981	468	XP_004251014	PREDICTED: uncharacterized protein LOC101247099 [Solanum lycopersicum]	281	5e-74
ColeSingleton10988	548	XP_002275330	PREDICTED: COBRA-like protein 7 [Vitis vinifera] unnamed protein product [Vitis vinifera]	177	9e-59
ColeSingleton10991	385	EOY03855	Transmembrane amino acid transporter family protein isoform 3, partial [Theobroma cacao] Transmembrane amino acid transporter family protein isoform 3, partial [Theobroma cacao]	126	2e-27
ColeSingleton10993	420	CBI35981	unnamed protein product [Vitis vinifera]	220	1e-55
ColeSingleton10994	242	ACI05258	type I MADS box transcription factor [Petunia x hybrida]	90.1	2e-16
ColeSingleton10998	454	XP_002331196	predicted protein [Populus trichocarpa] predicted protein [Populus trichocarpa]	89	4e-34
ColeSingleton11009	438	XP_002273614	PREDICTED: uncharacterized protein LOC100257993 [Vitis vinifera]	123	2e-26
ColeSingleton11010	305	CAN64061	hypothetical protein VITISV_000013 [Vitis vinifera]	100	2e-19
ColeSingleton11012	303	XP_002282368	PREDICTED: uncharacterized protein LOC100255613 [Vitis vinifera] unnamed protein product [Vitis vinifera]	58.5	7e-07
ColeSingleton11016	427	XP_002509470	conserved hypothetical protein [Ricinus communis] conserved hypothetical protein [Ricinus communis]	106	1e-24
ColeSingleton11017	355	XP_004239794	PREDICTED: DNA replication complex GINS protein PSF2-like [Solanum lycopersicum]	81.6	8e-14
ColeSingleton11018	154	EEE63893	hypothetical protein OsJ_18718 [Oryza sativa Japonica Group]	72	6e-11
ColeSingleton11019	419	XP_002277330	PREDICTED: PP2A regulatory subunit TAP46 [Vitis vinifera] unnamed protein product [Vitis vinifera]	193	2e-47
ColeSingleton11020	385	CBI28422	unnamed protein product [Vitis vinifera]	66.6	4e-19
ColeSingleton11026	166	EOX94586	Basic helix-loop-helix DNA-binding superfamily protein [Theobroma cacao]	109	4e-22
ColeSingleton11027	309	XP_004159402	PREDICTED: transmembrane 9 superfamily member 4-like [Cucumis sativus]	64.7	2e-09
ColeSingleton11031	224	XP_002519683	Katanin p60 ATPase-containing subunit, putative [Ricinus communis] Katanin p60 ATPase-containing subunit, putative [Ricinus communis]	56.6	3e-06
ColeSingleton11034	479	XP_004157302	PREDICTED: transcription factor IIIB 60 kDa subunit-like [Cucumis sativus]	96.7	2e-18
ColeSingleton11037	195	XP_002276781	PREDICTED: UDP-glycosyltransferase 73C3 [Vitis vinifera]	89.7	3e-16
ColeSingleton11039	473	XP_004234613	PREDICTED: proline-rich receptor-like protein kinase PERK1-like [Solanum lycopersicum]	122	5e-26
ColeSingleton11041	393	XP_002277620	PREDICTED: uncharacterized protein LOC100253955 [Vitis vinifera]	58.5	7e-07
ColeSingleton11043	398	XP_002527920	conserved hypothetical protein [Ricinus communis] conserved hypothetical protein [Ricinus communis]	58.2	7e-11
ColeSingleton11045	361	XP_002306811	predicted protein [Populus trichocarpa] predicted protein [Populus trichocarpa]	91.7	8e-17
ColeSingleton11053	256	AGJ83729	gag-pol polyprotein, partial [Caragana korshinskii]	59.3	5e-12
ColeSingleton11055	273	XP_004155012	PREDICTED: aldehyde dehydrogenase family 2 member B4, mitochondrial-like [Cucumis sativus]	57.4	2e-06
ColeSingleton11057	511	EOY17116	Cysteine-rich RLK (RECEPTOR-like protein kinase) 8 [Theobroma cacao]	50.1	4e-12
ColeSingleton11059	483	XP_004236813	PREDICTED: CDP-diacylglycerol--glycerol-3-phosphate 3-phosphatidyltransferase-like [Solanum lycopersicum]	95.1	7e-18
ColeSingleton11063	430	EOY11693	Metallopeptidase M24 family protein isoform 4 [Theobroma cacao]	93.6	2e-17
ColeSingleton11065	524	EOY13850	Receptor like protein 27 [Theobroma cacao]	76.3	7e-26
ColeSingleton11068	375	XP_003537876	PREDICTED: BTB/POZ domain-containing protein At1g63850-like [Glycine max]	78.6	7e-13
ColeSingleton11069	259	XP_002271257	PREDICTED: uncharacterized protein LOC100243147 [Vitis vinifera]	151	6e-35
ColeSingleton11070	470	XP_004983984	PREDICTED: chaperone protein ClpB2, chloroplastic-like [Setaria italica]	244	7e-63
ColeSingleton11071	498	CBI31426	unnamed protein product [Vitis vinifera]	64.3	1e-08
ColeSingleton11073	385	XP_002279374	PREDICTED: NADP-dependent glyceraldehyde-3-phosphate dehydrogenase [Vitis vinifera] unnamed protein product [Vitis vinifera]	218	7e-55
ColeSingleton11074	393	NP_001237760	malonyl-CoA:isoflavone 7-O-glucoside-6''-O-malonyltransferase [Glycine max] malonyl-CoA:isoflavone 7-O-glucoside-6''-O-malonyltransferase [Glycine max] malonyltransferase MT7 [Glycine max]	102	6e-20
ColeSingleton11077	369	EOY09060	SEC14 cytosolic factor family protein / phosphoglyceride transfer family protein isoform 1 [Theobroma cacao]	96.3	1e-24
ColeSingleton11083	487	EOX92828	Ketol-acid reductoisomerase [Theobroma cacao]	188	6e-46
ColeSingleton11084	424	XP_002269064	PREDICTED: kinetochore protein Nuf2 [Vitis vinifera] unnamed protein product [Vitis vinifera]	168	6e-40
ColeSingleton11085	338	XP_002532018	conserved hypothetical protein [Ricinus communis] conserved hypothetical protein [Ricinus communis]	80.1	2e-13
ColeSingleton11087	278	EOY17561	Autoinhibited Ca2+-ATPase 11 [Theobroma cacao]	126	2e-28
ColeSingleton11088	513	XP_004235302	PREDICTED: probable glucuronoxylan glucuronosyltransferase F8H-like isoform 2 [Solanum lycopersicum]	163	2e-38
ColeSingleton11089	364	CBI18374	unnamed protein product [Vitis vinifera]	184	1e-44
ColeSingleton11092	173	CBI34769	unnamed protein product [Vitis vinifera]	64.7	1e-08
ColeSingleton11093	522	EOX93880	B-cell receptor-associated protein 31-like [Theobroma cacao]	221	5e-56
ColeSingleton11094	470	EMJ18719	hypothetical protein PRUPE_ppa024360mg [Prunus persica]	218	5e-55
ColeSingleton11095	167	XP_004294900	PREDICTED: heat shock cognate protein 80-like [Fragaria vesca subsp. vesca]	56.6	3e-06
ColeSingleton11096	188	EOY00563	Pyruvate phosphate dikinase, PEP/pyruvate binding domain isoform 1 [Theobroma cacao] Pyruvate phosphate dikinase, PEP/pyruvate binding domain isoform 1 [Theobroma cacao]	67.4	1e-13
ColeSingleton11106	145	EOY06567	Alpha/beta-Hydrolases superfamily protein [Theobroma cacao]	47.4	8e-06
ColeSingleton11107	341	CBI24555	unnamed protein product [Vitis vinifera]	162	5e-38
ColeSingleton11108	440	XP_004151185	PREDICTED: uncharacterized protein DDB_G0273453/DDB_G0273565-like [Cucumis sativus]	84.7	9e-15
ColeSingleton11109	221	XP_002510655	conserved hypothetical protein [Ricinus communis] conserved hypothetical protein [Ricinus communis]	67.4	2e-09
ColeSingleton11112	426	XP_002299746	predicted protein [Populus trichocarpa] predicted protein [Populus trichocarpa]	88.2	9e-16
ColeSingleton11115	525	XP_004246156	PREDICTED: metalloendoproteinase 1-like [Solanum lycopersicum]	224	8e-57
ColeSingleton11118	351	CBL94163	putative RNA-directed DNA polymerase (Reverse transcriptase) [Malus domestica]	182	4e-44
ColeSingleton11122	469	CBI36654	unnamed protein product [Vitis vinifera]	114	1e-23
ColeSingleton11123	468	EOY04573	UDP-glycosyltransferase 74 F1, putative [Theobroma cacao]	170	2e-40
ColeSingleton11126	359	XP_004487615	PREDICTED: probable galacturonosyltransferase 12-like [Cicer arietinum]	177	1e-42
ColeSingleton11129	203	EPS68867	hypothetical protein M569_05902, partial [Genlisea aurea]	115	4e-24
ColeSingleton11131	402	XP_002278408	PREDICTED: E3 ubiquitin-protein ligase UPL3-like isoform 1 [Vitis vinifera]	157	8e-49
ColeSingleton11133	449	CAN73567	hypothetical protein VITISV_003451 [Vitis vinifera]	38.5	4e-06
ColeSingleton11134	233	XP_004494269	PREDICTED: uncharacterized protein LOC101509061 isoform X1 [Cicer arietinum] PREDICTED: uncharacterized protein LOC101509061 isoform X2 [Cicer arietinum]	96.3	1e-24
ColeSingleton11135	382	EOX93782	Auxin-responsive family protein [Theobroma cacao]	94.4	1e-17
ColeSingleton11138	248	XP_002272563	PREDICTED: CRS2-associated factor 1, mitochondrial [Vitis vinifera] unnamed protein product [Vitis vinifera]	103	2e-20
ColeSingleton11139	465	CAJ30045	conserved hypothetical protein [Magnetospirillum gryphiswaldense MSR-1]	126	3e-27
ColeSingleton11145	299	CAC95126	gag-pol polyprotein [Populus deltoides]	77.8	8e-25
ColeSingleton11148	365	XP_004506861	PREDICTED: coatomer subunit beta'-2-like [Cicer arietinum]	39.3	2e-08
ColeSingleton11154	411	XP_001763069	predicted protein [Physcomitrella patens subsp. patens] predicted protein [Physcomitrella patens subsp. patens]	92.8	3e-27
ColeSingleton11155	444	XP_004252902	PREDICTED: F-box/kelch-repeat protein At3g06240-like [Solanum lycopersicum]	88.6	6e-16
ColeSingleton11162	429	XP_002112456	hypothetical protein TRIADDRAFT_26041 [Trichoplax adhaerens] hypothetical protein TRIADDRAFT_26041 [Trichoplax adhaerens]	100	2e-19
ColeSingleton11165	257	AAM91874	putative copia-like polyprotein [Oryza sativa Japonica Group]	45.1	2e-09
ColeSingleton11166	285	XP_004229979	PREDICTED: clustered mitochondria protein homolog [Solanum lycopersicum]	132	3e-33
ColeSingleton11169	312	EAZ09687	hypothetical protein OsI_31969 [Oryza sativa Indica Group]	42.7	2e-12
ColeSingleton11170	500	XP_002268377	PREDICTED: guanosine-3',5'-bis(diphosphate) 3'-pyrophosphohydrolase [Vitis vinifera] unnamed protein product [Vitis vinifera]	287	7e-76
ColeSingleton11177	537	XP_003543328	PREDICTED: uncharacterized protein LOC100777625 isoform 2 [Glycine max]	100	2e-19
ColeSingleton11181	497	XP_002527083	conserved hypothetical protein [Ricinus communis] conserved hypothetical protein [Ricinus communis]	101	2e-53
ColeSingleton11184	489	XP_002300269	predicted protein [Populus trichocarpa] predicted protein [Populus trichocarpa]	67	2e-09
ColeSingleton11189	432	XP_003546857	PREDICTED: molybdopterin biosynthesis protein CNX2-like [Glycine max]	116	3e-24
ColeSingleton11190	300	XP_002510829	ATP binding protein, putative [Ricinus communis] ATP binding protein, putative [Ricinus communis]	64.7	1e-08
ColeSingleton11191	490	CAC95126	gag-pol polyprotein [Populus deltoides]	153	3e-36
ColeSingleton11194	509	XP_004291645	PREDICTED: 4-coumarate--CoA ligase-like 7-like [Fragaria vesca subsp. vesca]	182	4e-44
ColeSingleton11196	293	XP_004237788	PREDICTED: exocyst complex component 2-like [Solanum lycopersicum]	91.3	1e-21
ColeSingleton11197	356	EMJ13042	hypothetical protein PRUPE_ppa004687mg [Prunus persica]	58.5	2e-11
ColeSingleton11200	527	XP_004303118	PREDICTED: uncharacterized protein LOC101309462 [Fragaria vesca subsp. vesca]	97.8	4e-26
ColeSingleton11204	426	EEC80397	hypothetical protein OsI_22533 [Oryza sativa Indica Group]	70.9	1e-10
ColeSingleton11206	375	EOY15657	Growth-regulating factor 1 [Theobroma cacao]	70.5	2e-10
ColeSingleton11208	437	EHY54440	tubulin alpha chain [Exophiala dermatitidis NIH/UT8656]	140	2e-31
ColeSingleton11210	467	XP_002301314	predicted protein [Populus trichocarpa] predicted protein [Populus trichocarpa]	162	4e-38
ColeSingleton11212	142	XP_004489013	PREDICTED: eukaryotic translation initiation factor 2 subunit 3-like [Cicer arietinum]	86.7	2e-15
ColeSingleton11215	472	EOX95842	Programmed cell death protein 7 isoform 4 [Theobroma cacao]	131	7e-29
ColeSingleton11221	477	XP_004241340	PREDICTED: uncharacterized protein At1g08160-like [Solanum lycopersicum]	89.4	1e-16
ColeSingleton11222	450	CAN61992	hypothetical protein VITISV_030445 [Vitis vinifera]	111	3e-42
ColeSingleton11223	350	XP_002326774	predicted protein [Populus trichocarpa] predicted protein [Populus trichocarpa]	119	3e-31
ColeSingleton11225	360	EOX93480	DNAJ heat shock N-terminal domain-containing protein isoform 1 [Theobroma cacao] DNAJ heat shock N-terminal domain-containing protein isoform 1 [Theobroma cacao]	160	2e-37
ColeSingleton11228	334	EOY22364	Glucan synthase-like 8 isoform 3 [Theobroma cacao]	166	2e-39
ColeSingleton11235	287	EOX94093	RING/U-box superfamily protein [Theobroma cacao]	92.8	3e-17
ColeSingleton11237	399	XP_004294037	PREDICTED: uncharacterized protein LOC101299937 [Fragaria vesca subsp. vesca]	125	8e-29
ColeSingleton11246	403	EOX98938	SEC7-like guanine nucleotide exchange family protein [Theobroma cacao]	145	4e-33
ColeSingleton11247	419	XP_002454720	hypothetical protein SORBIDRAFT_04g036195 [Sorghum bicolor] hypothetical protein SORBIDRAFT_04g036195 [Sorghum bicolor]	55.1	8e-06
ColeSingleton11248	276	CBI29725	unnamed protein product [Vitis vinifera]	163	2e-38
ColeSingleton11255	175	NP_001234678	40S ribosomal protein S17 [Solanum lycopersicum] RecName: Full=40S ribosomal protein S17 40S ribosomal protein S17 [Solanum lycopersicum]	70.5	2e-10
ColeSingleton11257	378	XP_002269976	PREDICTED: cellulose synthase-like protein H1-like [Vitis vinifera]	149	4e-34
ColeSingleton11260	339	XP_002310351	predicted protein [Populus trichocarpa] predicted protein [Populus trichocarpa]	88.2	8e-16
ColeSingleton11264	227	XP_002333114	predicted protein [Populus trichocarpa] predicted protein [Populus trichocarpa] predicted protein [Populus trichocarpa] predicted protein [Populus trichocarpa] predicted protein [Populus trichocarpa] predicted protein [Populus trichocarpa]	112	4e-23
ColeSingleton11266	450	CBI37733	unnamed protein product [Vitis vinifera]	126	1e-46
ColeSingleton11270	485	XP_004304633	PREDICTED: ADP-ribosylation factor 1-like isoform 1 [Fragaria vesca subsp. vesca]	64.7	1e-08
ColeSingleton11274	223	XP_002680719	predicted protein [Naegleria gruberi] predicted protein [Naegleria gruberi]	55.1	8e-06
ColeSingleton11275	300	EOY10090	Peptidyl-tRNA hydrolase II family protein isoform 1 [Theobroma cacao]	45.1	8e-09
ColeSingleton11276	418	EOY05950	Cellulose synthase like G2, putative isoform 2, partial [Theobroma cacao]	168	5e-40
ColeSingleton11277	475	XP_003555110	PREDICTED: DNA-directed RNA polymerases I and III subunit RPAC2-like [Glycine max]	117	6e-33
ColeSingleton11278	445	XP_002278505	PREDICTED: CRS2-associated factor 2, mitochondrial-like [Vitis vinifera]	150	2e-34
ColeSingleton11281	456	XP_002269519	PREDICTED: F-box protein SKIP5 [Vitis vinifera] unnamed protein product [Vitis vinifera]	221	3e-62
ColeSingleton11282	441	XP_003531144	PREDICTED: l-Ala-D/L-Glu epimerase-like [Glycine max]	163	2e-38
ColeSingleton11284	469	CBI22113	unnamed protein product [Vitis vinifera]	112	3e-25
ColeSingleton11285	465	XP_002331157	predicted protein [Populus trichocarpa] predicted protein [Populus trichocarpa]	90.1	2e-16
ColeSingleton11286	330	XP_002522001	conserved hypothetical protein [Ricinus communis] conserved hypothetical protein [Ricinus communis]	160	1e-37
ColeSingleton11288	205	AAW28578	Putative gag-pol polyprotein, identical [Solanum demissum]	96.7	2e-18
ColeSingleton11290	439	XP_002276564	PREDICTED: E3 ubiquitin-protein ligase Topors-like [Vitis vinifera]	104	4e-21
ColeSingleton11291	168	AEC04825	ubiquitin ligase protein [Vitis pseudoreticulata]	71.2	1e-10
ColeSingleton11292	492	XP_002266658	PREDICTED: uncharacterized protein LOC100261996 [Vitis vinifera] unnamed protein product [Vitis vinifera]	179	6e-47
ColeSingleton11294	361	CBI27043	unnamed protein product [Vitis vinifera]	152	4e-35
ColeSingleton11296	519	EOY25069	Phosphatase 2C family protein, putative [Theobroma cacao]	105	5e-21
ColeSingleton11300	429	XP_002299759	predicted protein [Populus trichocarpa] predicted protein [Populus trichocarpa]	131	9e-29
ColeSingleton11303	369	CBI19246	unnamed protein product [Vitis vinifera]	142	4e-32
ColeSingleton11308	225	XP_003608436	White-brown-complex ABC transporter family [Medicago truncatula] White-brown-complex ABC transporter family [Medicago truncatula]	112	6e-23
ColeSingleton11310	387	EOY23099	Uncharacterized protein TCM_015097 [Theobroma cacao]	96.7	6e-22
ColeSingleton11314	384	XP_002282973	PREDICTED: protein IQ-DOMAIN 1 [Vitis vinifera] unnamed protein product [Vitis vinifera]	112	3e-23
ColeSingleton11318	390	XP_004155791	PREDICTED: LOW QUALITY PROTEIN: brefeldin A-inhibited guanine nucleotide-exchange protein 2-like [Cucumis sativus]	234	7e-60
ColeSingleton11321	456	EMJ23137	hypothetical protein PRUPE_ppa001460mg [Prunus persica]	48.5	3e-09
ColeSingleton11325	228	EOY02611	Pectin lyase-like superfamily protein [Theobroma cacao]	79.7	1e-17
ColeSingleton11331	422	EOY04413	Leucine-rich repeat protein kinase family protein isoform 1 [Theobroma cacao] Leucine-rich repeat protein kinase family protein isoform 1 [Theobroma cacao]	121	8e-40
ColeSingleton11332	431	EMC94835	hypothetical protein BAUCODRAFT_74281 [Baudoinia compniacensis UAMH 10762]	111	7e-23
ColeSingleton11335	417	EOY04478	Kinase superfamily protein isoform 2 [Theobroma cacao]	242	3e-62
ColeSingleton11336	381	EOY10094	Zinc knuckle family protein, putative [Theobroma cacao]	69.3	4e-10
ColeSingleton11338	423	EOY03039	Tetratricopeptide repeat-like superfamily protein [Theobroma cacao]	56.2	4e-06
ColeSingleton11346	330	EOY04824	Golgi transport complex protein-related [Theobroma cacao]	121	9e-26
ColeSingleton11349	303	XP_002264410	PREDICTED: laccase-6 [Vitis vinifera] unnamed protein product [Vitis vinifera]	97.1	2e-18
ColeSingleton11351	486	XP_003624880	Disease resistance protein RPS2 [Medicago truncatula] Disease resistance protein RPS2 [Medicago truncatula]	75.5	6e-12
ColeSingleton11356	292	XP_002522145	conserved hypothetical protein [Ricinus communis] conserved hypothetical protein [Ricinus communis]	63.9	2e-08
ColeSingleton11357	466	EOX99601	Aldolase-type TIM barrel family protein isoform 1 [Theobroma cacao]	112	5e-33
ColeSingleton11366	504	XP_004236762	PREDICTED: ABC transporter B family member 20-like [Solanum lycopersicum]	273	1e-71
ColeSingleton11369	387	CAC95126	gag-pol polyprotein [Populus deltoides]	43.1	2e-06
ColeSingleton11370	530	XP_003532213	PREDICTED: patellin-5-like [Glycine max]	172	3e-49
ColeSingleton11371	394	AFU25705	gag-pol precursor [Castanea mollissima]	113	2e-23
ColeSingleton11374	434	XP_004241982	PREDICTED: uncharacterized protein LOC101247436 [Solanum lycopersicum]	197	8e-49
ColeSingleton11375	169	XP_003592309	BAG-domain protein 1 / regulator of cell death [Medicago truncatula] BAG-domain protein 1 / regulator of cell death [Medicago truncatula]	59.3	1e-08
ColeSingleton11384	253	XP_003519620	PREDICTED: DUF21 domain-containing protein At1g55930, chloroplastic-like [Glycine max]	120	1e-25
ColeSingleton11385	492	AFQ94050	auxin response factor 1 [Camellia sinensis]	311	6e-83
ColeSingleton11386	264	XP_004292483	PREDICTED: potassium transporter 7-like [Fragaria vesca subsp. vesca]	167	1e-39
ColeSingleton11387	395	EOY06161	Peroxygenase 2 isoform 1 [Theobroma cacao]	92.8	3e-17
ColeSingleton11388	501	EOY11403	Chloroplast-targeted copper chaperone-like protein [Theobroma cacao]	128	6e-28
ColeSingleton11399	118	XP_002324751	predicted protein [Populus trichocarpa] predicted protein [Populus trichocarpa]	40.4	6e-07
ColeSingleton11402	376	CAN81192	hypothetical protein VITISV_022847 [Vitis vinifera]	92.4	6e-21
ColeSingleton11405	372	AGJ83806	calcium-dependent protein kinase 1d [Vitis amurensis]	127	1e-27
ColeSingleton11406	471	XP_002514901	histidine kinase 1, 2, 3 plant, putative [Ricinus communis] histidine kinase 1, 2, 3 plant, putative [Ricinus communis]	170	1e-40
ColeSingleton11408	268	XP_004492805	PREDICTED: probable WRKY transcription factor 12-like isoform X1 [Cicer arietinum]	119	4e-25
ColeSingleton11410	474	ABY55551	calcium-dependent protein kinase [Swainsona canescens]	306	2e-81
ColeSingleton11412	219	CAN62636	hypothetical protein VITISV_006313 [Vitis vinifera]	88.6	7e-16
ColeSingleton11414	399	XP_004236393	PREDICTED: uncharacterized protein At1g51745-like [Solanum lycopersicum]	166	2e-39
ColeSingleton11415	371	XP_002269952	PREDICTED: mitochondrial metalloendopeptidase OMA1 [Vitis vinifera]	140	5e-32
ColeSingleton11421	382	XP_004229933	PREDICTED: probable receptor-like protein kinase At5g24010-like [Solanum lycopersicum]	117	1e-24
ColeSingleton11422	495	XP_002306628	predicted protein [Populus trichocarpa] predicted protein [Populus trichocarpa]	55.1	1e-13
ColeSingleton11423	369	EPS68860	hypothetical protein M569_05909 [Genlisea aurea]	75.5	6e-12
ColeSingleton11425	395	EOY15658	Ribosomal RNA processing protein 1 B, putative [Theobroma cacao]	137	1e-30
ColeSingleton11429	223	EOY31671	Uncharacterized protein isoform 2 [Theobroma cacao]	127	1e-27
ColeSingleton11431	435	NP_001236615	Dof6 transcription factor [Glycine max] Dof6 transcription factor [Glycine max]	183	2e-44
ColeSingleton11438	374	AAQ09996	S3 self-incompatibility locus-linked pollen 3.15 protein [Petunia integrifolia subsp. inflata]	191	3e-50
ColeSingleton11441	398	CAA44478	ORF 873 [Helianthus annuus] unnamed protein product [Helianthus annuus]	113	2e-23
ColeSingleton11444	386	EMJ16210	hypothetical protein PRUPE_ppa002494mg [Prunus persica]	75.1	7e-12
ColeSingleton946	329	EOY34692	Nodulin MtN21 /EamA-like transporter family protein isoform 1 [Theobroma cacao]	108	2e-35
ColeSingleton948	249	XP_004291539	PREDICTED: protein FAF-like, chloroplastic-like [Fragaria vesca subsp. vesca]	63.9	2e-08
ColeSingleton949	406	EOY22369	RING/U-box superfamily protein [Theobroma cacao]	103	4e-38
ColeSingleton950	448	AAT40504	Polyprotein, putative [Solanum demissum]	68.9	6e-14
ColeSingleton953	419	CAN74240	hypothetical protein VITISV_043330 [Vitis vinifera]	129	6e-33
ColeSingleton954	421	XP_002282505	PREDICTED: uncharacterized protein LOC100262755 [Vitis vinifera]	162	8e-46
ColeSingleton955	502	XP_002277307	PREDICTED: trihelix transcription factor GT-2-like [Vitis vinifera] unnamed protein product [Vitis vinifera]	234	6e-60
ColeSingleton957	267	XP_004252624	PREDICTED: protein STRUBBELIG-RECEPTOR FAMILY 6-like [Solanum lycopersicum]	111	9e-23
ColeSingleton959	358	XP_004228617	PREDICTED: receptor-like protein 12-like [Solanum lycopersicum]	147	1e-33
ColeSingleton963	357	XP_003632203	PREDICTED: E3 UFM1-protein ligase 1 homolog isoform 2 [Vitis vinifera]	199	2e-49
ColeSingleton965	338	XP_003627211	U-box domain-containing protein [Medicago truncatula] U-box domain-containing protein [Medicago truncatula]	60.1	2e-07
ColeSingleton966	275	XP_002307833	predicted protein [Populus trichocarpa] predicted protein [Populus trichocarpa]	49.7	2e-12
ColeSingleton969	174	EMJ20136	hypothetical protein PRUPE_ppa002260mg [Prunus persica]	61.2	1e-14
ColeSingleton972	363	EOY27771	UDP-N-acetylglucosamine transferase subunit ALG14 isoform 1 [Theobroma cacao] UDP-N-acetylglucosamine transferase subunit ALG14 isoform 1 [Theobroma cacao]	84.3	1e-14
ColeSingleton973	486	EOY18445	Nitrilase/cyanide hydratase and apolipoprotein N-acyltransferase family protein isoform 4 [Theobroma cacao]	229	2e-58
ColeSingleton976	334	XP_002277892	PREDICTED: dipeptidyl peptidase 8-like [Vitis vinifera] unnamed protein product [Vitis vinifera]	202	2e-50
ColeSingleton977	474	ABX82799	acyl-ACP thioesterase [Jatropha curcas]	148	5e-40
ColeSingleton982	260	EMJ09549	hypothetical protein PRUPE_ppa001799mg [Prunus persica]	95.9	4e-18
ColeSingleton986	481	XP_003735588	PREDICTED: uncharacterized protein LOC100894812 [Callithrix jacchus]	66.2	3e-09
ColeSingleton989	423	EAZ13725	hypothetical protein OsJ_03648 [Oryza sativa Japonica Group]	94.4	4e-37
ColeSingleton991	369	EOY31372	Pentatricopeptide repeat superfamily protein isoform 1 [Theobroma cacao] Pentatricopeptide repeat superfamily protein isoform 1 [Theobroma cacao] Pentatricopeptide repeat superfamily protein isoform 1 [Theobroma cacao]	75.9	3e-21
ColeSingleton992	491	XP_004156220	PREDICTED: LOW QUALITY PROTEIN: auxin transport protein BIG-like [Cucumis sativus]	203	2e-60
ColeSingleton993	287	EMJ16308	hypothetical protein PRUPE_ppa012830mg [Prunus persica]	133	2e-29
ColeSingleton998	427	EOY17386	12-oxophytodienoate reductase 2 [Theobroma cacao]	168	4e-51
ColeSingleton999	372	XP_004296304	PREDICTED: putative peptide/nitrate transporter At5g19640-like [Fragaria vesca subsp. vesca]	191	5e-47
ColeSingleton1001	437	EOX94711	Transducin/WD40 repeat-like superfamily protein, putative isoform 1 [Theobroma cacao]	103	3e-20
ColeSingleton1008	281	XP_004241687	PREDICTED: uncharacterized protein LOC101260542 [Solanum lycopersicum]	95.5	5e-18
ColeSingleton1010	467	XP_002276341	PREDICTED: transcription factor MYB104 [Vitis vinifera] unnamed protein product [Vitis vinifera]	186	2e-45
ColeSingleton1013	387	AFU25704	gag-pol precursor [Castanea mollissima]	73.9	2e-11
ColeSingleton1014	280	CBI35876	unnamed protein product [Vitis vinifera]	94.7	9e-18
ColeSingleton1019	512	CAN74679	hypothetical protein VITISV_006858 [Vitis vinifera]	169	3e-40
ColeSingleton1024	524	CAN82440	hypothetical protein VITISV_006122 [Vitis vinifera]	52	2e-12
ColeSingleton1026	432	EOY06671	Acyl-activating enzyme 7 [Theobroma cacao]	122	2e-47
ColeSingleton1028	469	EOY24298	Uncharacterized protein TCM_015942 [Theobroma cacao]	110	2e-22
ColeSingleton1030	163	XP_004289276	PREDICTED: protein NLP8-like [Fragaria vesca subsp. vesca]	77.8	1e-12
ColeSingleton1033	275	XP_002283148	PREDICTED: E3 ubiquitin-protein ligase SDIR1-like [Vitis vinifera] unnamed protein product [Vitis vinifera]	85.5	1e-19
ColeSingleton1036	360	CAN75734	hypothetical protein VITISV_030148 [Vitis vinifera]	124	4e-32
ColeSingleton1037	444	XP_002885143	hypothetical protein ARALYDRAFT_897963 [Arabidopsis lyrata subsp. lyrata] hypothetical protein ARALYDRAFT_897963 [Arabidopsis lyrata subsp. lyrata]	73.9	2e-11
ColeSingleton1047	549	Q8LPT9	RecName: Full=Alpha-glucan water dikinase, chloroplastic; AltName: Full=Starch-related protein R1; Flags: Precursor R1 [Citrus reticulata]	158	1e-50
ColeSingleton1048	473	XP_004245267	PREDICTED: eukaryotic translation initiation factor 3 subunit L-like [Solanum lycopersicum]	112	2e-25
ColeSingleton11446	420	CBI19031	unnamed protein product [Vitis vinifera]	61.2	1e-07
ColeSingleton11450	367	XP_003552373	PREDICTED: NAD-dependent malic enzyme 59 kDa isoform, mitochondrial-like isoform 1 [Glycine max]	82.8	4e-30
ColeSingleton11451	448	EOY05633	Major facilitator superfamily protein [Theobroma cacao]	151	3e-41
ColeSingleton11453	153	XP_002530232	CCR4-NOT transcription complex subunit, putative [Ricinus communis] CCR4-NOT transcription complex subunit, putative [Ricinus communis]	76.3	3e-12
ColeSingleton11454	484	EHY52247	succinate-semialdehyde dehydrogenase [Exophiala dermatitidis NIH/UT8656]	182	2e-44
ColeSingleton11466	432	XP_002534135	Purple acid phosphatase precursor, putative [Ricinus communis] Purple acid phosphatase precursor, putative [Ricinus communis]	145	6e-33
ColeSingleton11467	424	XP_002263743	PREDICTED: CDT1-like protein a, chloroplastic-like [Vitis vinifera]	57.4	2e-09
ColeSingleton11468	410	EOX99018	Uncharacterized protein isoform 6 [Theobroma cacao]	129	4e-28
ColeSingleton11470	429	XP_001561662	hypothetical protein LBRM_03_0720 [Leishmania braziliensis MHOM/BR/75/M2904] hypothetical protein LBRM_03_0720 [Leishmania braziliensis MHOM/BR/75/M2904]	42.4	2e-06
ColeSingleton11478	374	XP_002524792	laccase, putative [Ricinus communis] laccase, putative [Ricinus communis]	159	4e-37
ColeSingleton11479	380	BAG16530	putative phosphate-induced protein [Capsicum chinense]	58.5	4e-16
ColeSingleton11483	416	XP_004248331	PREDICTED: metal tolerance protein 10-like [Solanum lycopersicum]	55.8	5e-06
ColeSingleton11487	416	XP_004248526	PREDICTED: peptidyl-prolyl cis-trans isomerase FKBP20-2, chloroplastic-like [Solanum lycopersicum]	199	3e-49
ColeSingleton11490	502	WP_001307499	hypothetical protein [Escherichia coli] hypothetical protein ECCG_04537 [Escherichia coli B088]	347	6e-94
ColeSingleton11492	128	CBI18542	unnamed protein product [Vitis vinifera]	57	2e-06
ColeSingleton11493	335	XP_002524809	elongation factor tu, putative [Ricinus communis] elongation factor tu, putative [Ricinus communis]	181	7e-44
ColeSingleton11494	524	CAN65744	hypothetical protein VITISV_037761 [Vitis vinifera]	293	2e-77
ColeSingleton11498	373	XP_002526099	Biotin carboxyl carrier protein subunit of of Het-ACCase (BCCP2) [Ricinus communis] Biotin carboxyl carrier protein subunit of of Het-ACCase (BCCP2) [Ricinus communis]	129	4e-28
ColeSingleton11499	120	XP_004495555	PREDICTED: probable UDP-N-acetylglucosamine--peptide N-acetylglucosaminyltransferase SEC-like isoform X2 [Cicer arietinum]	70.9	1e-10
ColeSingleton11500	485	XP_002271063	PREDICTED: pentatricopeptide repeat-containing protein At1g11290-like [Vitis vinifera]	242	3e-62
ColeSingleton11505	414	XP_002309043	predicted protein [Populus trichocarpa] predicted protein [Populus trichocarpa]	56.6	2e-13
ColeSingleton11507	414	XP_002522581	hypothetical protein RCOM_1015180 [Ricinus communis] hypothetical protein RCOM_1015180 [Ricinus communis]	200	2e-49
ColeSingleton11508	495	CAN71108	hypothetical protein VITISV_001478 [Vitis vinifera]	79	3e-30
ColeSingleton11512	404	XP_002527240	hypothetical protein RCOM_0231790 [Ricinus communis] hypothetical protein RCOM_0231790 [Ricinus communis]	61.6	2e-15
ColeSingleton11514	483	ABC26010	9-cis-epoxycarotenoid dioxygenase 5 [Citrus clementina]	85.9	1e-31
ColeSingleton11515	177	XP_004963609	PREDICTED: glutamate synthase 2 [NADH], chloroplastic-like [Setaria italica]	58.2	9e-07
ColeSingleton11516	414	XP_002283389	PREDICTED: telomere repeat-binding protein 5-like [Vitis vinifera]	78.6	7e-13
ColeSingleton11517	465	CBI15020	unnamed protein product [Vitis vinifera]	96.3	3e-18
ColeSingleton11518	395	XP_002271470	PREDICTED: GDSL esterase/lipase At1g54790-like [Vitis vinifera]	122	5e-26
ColeSingleton11519	484	EPS64259	hypothetical protein M569_10523, partial [Genlisea aurea]	141	6e-32
ColeSingleton11522	472	XP_004293181	PREDICTED: uncharacterized protein LOC101298394 [Fragaria vesca subsp. vesca]	52.8	2e-07
ColeSingleton11526	429	EMJ11420	hypothetical protein PRUPE_ppa015589mg [Prunus persica]	201	5e-50
ColeSingleton11527	273	XP_002530253	dead box ATP-dependent RNA helicase, putative [Ricinus communis] dead box ATP-dependent RNA helicase, putative [Ricinus communis]	89.7	3e-16
ColeSingleton11528	163	XP_004295134	PREDICTED: ubiquitin carboxyl-terminal hydrolase 12-like [Fragaria vesca subsp. vesca]	104	9e-21
ColeSingleton11529	284	AGJ52155	WRKY transcription factor 09 [Jatropha curcas]	116	3e-24
ColeSingleton11533	432	EOY08471	Serine/threonine-protein kinase irlC isoform 2 [Theobroma cacao]	63.2	3e-08
ColeSingleton11537	431	XP_003532673	PREDICTED: LRR receptor-like serine/threonine-protein kinase GSO1-like [Glycine max]	164	7e-39
ColeSingleton11542	467	CBI37465	unnamed protein product [Vitis vinifera]	195	4e-48
ColeSingleton11544	149	XP_004958201	PREDICTED: uncharacterized protein LOC101756977 [Setaria italica]	67.8	4e-13
ColeSingleton11545	447	XP_004296783	PREDICTED: uncharacterized protein LOC101291421 [Fragaria vesca subsp. vesca]	211	5e-53
ColeSingleton11548	167	XP_002321665	jumonji domain protein [Populus trichocarpa] jumonji domain protein [Populus trichocarpa]	53.1	5e-07
ColeSingleton11550	205	AFP55546	gag-pol polyprotein [Rosa rugosa]	67	1e-14
ColeSingleton11553	425	ACJ85385	unknown [Medicago truncatula] unknown [Medicago truncatula]	156	2e-36
ColeSingleton11554	462	CBI37455	unnamed protein product [Vitis vinifera]	207	9e-52
ColeSingleton11556	444	XP_002275720	PREDICTED: uncharacterized protein LOC100264463 [Vitis vinifera] unnamed protein product [Vitis vinifera]	127	9e-28
ColeSingleton11559	440	EOY25283	Isoflavone reductase isoform 1 [Theobroma cacao]	163	8e-57
ColeSingleton11560	432	XP_002268128	PREDICTED: uncharacterized protein sll1770-like [Vitis vinifera]	97.8	9e-24
ColeSingleton11561	376	XP_004953462	PREDICTED: mitochondrial import inner membrane translocase subunit Tim13-like [Setaria italica]	73.6	2e-11
ColeSingleton11564	259	XP_004232845	PREDICTED: uncharacterized protein LOC101266688 [Solanum lycopersicum]	126	4e-28
ColeSingleton11566	110	XP_003523199	PREDICTED: uncharacterized protein At1g10890-like [Glycine max]	65.5	6e-09
ColeSingleton11572	378	CAN81392	hypothetical protein VITISV_043256 [Vitis vinifera]	90.9	3e-19
ColeSingleton11582	362	CBI25341	unnamed protein product [Vitis vinifera]	124	1e-36
ColeSingleton11587	482	XP_002524779	sugar transporter, putative [Ricinus communis] sugar transporter, putative [Ricinus communis]	117	5e-51
ColeSingleton11588	269	XP_002278678	PREDICTED: caffeoyl-CoA O-methyltransferase-like [Vitis vinifera]	71.2	1e-10
ColeSingleton11589	366	EOY05382	Uncharacterized protein TCM_020392 [Theobroma cacao]	95.9	4e-18
ColeSingleton11592	396	CBI37151	unnamed protein product [Vitis vinifera]	107	2e-21
ColeSingleton11595	169	XP_004997932	hypothetical protein PTSG_11808 [Salpingoeca sp. ATCC 50818] hypothetical protein PTSG_11808 [Salpingoeca sp. ATCC 50818]	73.2	3e-11
ColeSingleton11596	515	XP_002323268	predicted protein [Populus trichocarpa] predicted protein [Populus trichocarpa]	79.7	3e-30
ColeSingleton11597	417	XP_004244327	PREDICTED: PRA1 family protein G2-like [Solanum lycopersicum]	90.1	2e-16
ColeSingleton11600	226	AAA21437	lipid transfer protein [Nicotiana tabacum]	44.7	5e-09
ColeSingleton11601	481	XP_004504484	PREDICTED: F-box protein SKIP14-like [Cicer arietinum]	117	2e-24
ColeSingleton11602	254	XP_003526016	PREDICTED: LOW QUALITY PROTEIN: cytokinin riboside 5'-monophosphate phosphoribohydrolase LOG8-like [Glycine max]	154	7e-36
ColeSingleton11603	318	XP_004236774	PREDICTED: UDP-glycosyltransferase 79B6-like isoform 1 [Solanum lycopersicum]	61.6	2e-17
ColeSingleton11608	405	ADO14118	fusion protein [Blueberry latent virus]	192	3e-47
ColeSingleton11613	462	AAF82228	Contains similarity to a polygalacturonase-like protein gi|7529266 from Arabidopsis thaliana BAC F18P9 gb|AL138654 and contains multiple polygalacturonase (pectinase) PF|00295 domains [Arabidopsis thaliana]	283	1e-74
ColeSingleton11616	446	XP_004251421	PREDICTED: uncharacterized protein LOC101255958 [Solanum lycopersicum]	174	7e-42
ColeSingleton11617	389	CBI16031	unnamed protein product [Vitis vinifera]	82	6e-14
ColeSingleton11621	129	XP_003608684	Peroxisomal acyl-CoA oxidase 1A [Medicago truncatula] Peroxisomal acyl-CoA oxidase 1A [Medicago truncatula]	57.8	4e-10
ColeSingleton11622	327	AGH32870	auxin response factor 5 [Camellia sinensis]	181	6e-44
ColeSingleton11627	482	XP_002276556	PREDICTED: pentatricopeptide repeat-containing protein At5g39980, chloroplastic [Vitis vinifera] unnamed protein product [Vitis vinifera]	119	8e-29
ColeSingleton11630	466	ABB16971	unknown [Solanum tuberosum]	108	2e-51
ColeSingleton11632	303	XP_002278688	PREDICTED: eyes absent homolog 2 [Vitis vinifera]	144	4e-38
ColeSingleton11634	100	XP_003349067	hypothetical protein SMAC_06842 [Sordaria macrospora k-hell] unnamed protein product [Sordaria macrospora k-hell]	56.2	3e-06
ColeSingleton11635	370	NP_064005	orf152 gene product (mitochondrion) [Beta vulgaris subsp. vulgaris] hypothetical protein BevumaM_p135 [Beta vulgaris subsp. maritima] hypothetical protein BemaM_p129 [Beta macrocarpa] orf152 [Beta vulgaris subsp. vulgaris] orf152 [Beta vulgaris subsp. vulgaris] orf152 [Beta vulgaris subsp. vulgaris] hypothetical protein [Beta vulgaris subsp. maritima] hypothetical protein [Beta vulgaris subsp. ma…	113	2e-41
ColeSingleton11637	205	XP_002879979	hypothetical protein ARALYDRAFT_483324 [Arabidopsis lyrata subsp. lyrata] hypothetical protein ARALYDRAFT_483324 [Arabidopsis lyrata subsp. lyrata]	113	2e-23
ColeSingleton11639	427	EOY22905	Haloacid dehalogenase-like hydrolase superfamily protein isoform 5 [Theobroma cacao]	192	3e-47
ColeSingleton11641	124	XP_003561873	PREDICTED: DNA-directed RNA polymerase II subunit RPB2-like [Brachypodium distachyon]	62	9e-09
ColeSingleton11643	369	ABK24353	unknown [Picea sitchensis]	66.2	2e-15
ColeSingleton11645	482	EMJ02408	hypothetical protein PRUPE_ppa001687mg [Prunus persica]	274	8e-72
ColeSingleton11646	278	XP_002281838	PREDICTED: probable 1-acyl-sn-glycerol-3-phosphate acyltransferase 4-like [Vitis vinifera]	68.6	7e-10
ColeSingleton11647	176	EOX98467	Glycosyl hydrolase family protein [Theobroma cacao]	63.2	1e-10
ColeSingleton11650	356	XP_002283240	PREDICTED: uncharacterized protein LOC100251643 [Vitis vinifera] hypothetical protein VITISV_007445 [Vitis vinifera] unnamed protein product [Vitis vinifera]	71.2	1e-10
ColeSingleton11653	409	XP_002303447	predicted protein [Populus trichocarpa] predicted protein [Populus trichocarpa]	183	1e-45
ColeSingleton11655	307	XP_002269786	PREDICTED: subtilisin-like protease [Vitis vinifera] unnamed protein product [Vitis vinifera]	129	3e-28
ColeSingleton11658	449	XP_002282310	PREDICTED: uncharacterized protein LOC100266128 [Vitis vinifera] unnamed protein product [Vitis vinifera]	119	4e-28
ColeSingleton11667	474	EOA23618	hypothetical protein CARUB_v10016817mg [Capsella rubella]	161	2e-47
ColeSingleton11670	147	XP_004291487	PREDICTED: V-type proton ATPase 21 kDa proteolipid subunit-like [Fragaria vesca subsp. vesca]	68.2	9e-10
ColeSingleton11674	485	XP_004234363	PREDICTED: E3 ubiquitin ligase BIG BROTHER-like [Solanum lycopersicum]	147	9e-34
ColeSingleton11675	461	CBI37943	unnamed protein product [Vitis vinifera]	171	6e-41
ColeSingleton11680	499	XP_002274374	PREDICTED: zinc finger protein ZAT5 [Vitis vinifera]	130	6e-39
ColeSingleton11682	178	XP_002511800	conserved hypothetical protein [Ricinus communis] conserved hypothetical protein [Ricinus communis]	69.3	4e-10
ColeSingleton11692	480	EOY29768	GATA transcription factor 9, putative [Theobroma cacao]	150	1e-34
ColeSingleton11694	501	XP_004156697	PREDICTED: abhydrolase domain-containing protein FAM108B1-like [Cucumis sativus]	103	3e-20
ColeSingleton11697	401	XP_004354722	hypothetical protein DFA_09368 [Dictyostelium fasciculatum] hypothetical protein DFA_09368 [Dictyostelium fasciculatum]	73.9	2e-11
ColeSingleton11700	457	CAN62229	hypothetical protein VITISV_010990 [Vitis vinifera]	75.5	6e-12
ColeSingleton11701	546	CAN60289	hypothetical protein VITISV_011784 [Vitis vinifera]	69.3	5e-10
ColeSingleton11702	358	CBI16259	unnamed protein product [Vitis vinifera]	80.1	2e-13
ColeSingleton11704	321	CAN61929	hypothetical protein VITISV_014855 [Vitis vinifera]	115	4e-24
ColeSingleton11708	446	Q2PCF1	RecName: Full=Pleiotropic drug resistance protein 2; AltName: Full=NpPDR2 PDR-like ABC transporter [Nicotiana plumbaginifolia]	59.7	3e-07
ColeSingleton11712	347	AFI98389	peroxisomal ascorbate peroxidase [Camellia sinensis]	115	5e-24
ColeSingleton11714	401	XP_003632363	PREDICTED: uncharacterized protein LOC100254568 [Vitis vinifera]	115	4e-24
ColeSingleton11720	427	EOX97073	Jasmonate-zim-domain protein 12, putative isoform 2 [Theobroma cacao]	131	9e-29
ColeSingleton11721	422	XP_003633602	PREDICTED: myosin-Vb-like [Vitis vinifera]	130	2e-28
ColeSingleton11722	445	XP_002271987	PREDICTED: 5'-3' exoribonuclease 4-like [Vitis vinifera]	266	2e-69
ColeSingleton11726	403	XP_002264487	PREDICTED: uncharacterized protein LOC100244254 [Vitis vinifera]	184	3e-54
ColeSingleton11727	330	XP_002302644	predicted protein [Populus trichocarpa] predicted protein [Populus trichocarpa]	77.4	1e-12
ColeSingleton11729	474	XP_002519802	conserved hypothetical protein [Ricinus communis] conserved hypothetical protein [Ricinus communis]	265	4e-69
ColeSingleton11730	328	XP_004231793	PREDICTED: ankyrin-3-like [Solanum lycopersicum]	125	4e-27
ColeSingleton11731	484	EOY02012	Kinase 2B isoform 3 [Theobroma cacao]	92.4	4e-17
ColeSingleton11733	412	XP_004290577	PREDICTED: scarecrow-like protein 1-like [Fragaria vesca subsp. vesca]	104	7e-31
ColeSingleton11734	307	XP_004242539	PREDICTED: uncharacterized protein LOC101263128 [Solanum lycopersicum]	82.4	5e-14
ColeSingleton11739	406	AEC10971	hypothetical protein [Camellia sinensis]	153	2e-35
ColeSingleton11742	497	EOY09862	Kunitz family trypsin and protease inhibitor protein [Theobroma cacao]	92	4e-25
ColeSingleton11743	457	EOX98479	DNA/RNA polymerases superfamily protein isoform 1 [Theobroma cacao]	129	2e-39
ColeSingleton11744	321	XP_003526482	PREDICTED: uncharacterized protein KIAA0090 homolog [Glycine max]	122	3e-33
ColeSingleton11745	469	XP_002532393	Transcription factor HBP-1b(c1), putative [Ricinus communis] Transcription factor HBP-1b(c1), putative [Ricinus communis]	162	3e-74
ColeSingleton11749	288	XP_002265574	PREDICTED: cell division topological specificity factor homolog, chloroplastic [Vitis vinifera] unnamed protein product [Vitis vinifera]	75.5	6e-12
ColeSingleton11751	424	EFB14699	hypothetical protein PANDA_004153 [Ailuropoda melanoleuca]	63.9	2e-08
ColeSingleton11752	176	XP_002327363	predicted protein [Populus trichocarpa] predicted protein [Populus trichocarpa]	70.5	2e-10
ColeSingleton11754	211	XP_002283908	PREDICTED: AT-rich interactive domain-containing protein 2 [Vitis vinifera] hypothetical protein VITISV_003946 [Vitis vinifera] unnamed protein product [Vitis vinifera]	110	1e-22
ColeSingleton11755	409	XP_004231566	PREDICTED: ADP-ribosylation factor GTPase-activating protein AGD12-like [Solanum lycopersicum]	118	2e-28
ColeSingleton11762	452	CAN82884	hypothetical protein VITISV_023155 [Vitis vinifera]	61.2	2e-14
ColeSingleton11763	495	EOY24287	Tryptophan RNA-binding attenuator protein-like [Theobroma cacao]	88.2	8e-16
ColeSingleton11770	454	ACS72177	PsaB [Pristiglottis montana]	81.3	3e-23
ColeSingleton11771	407	XP_002270918	PREDICTED: acetyl-coenzyme A synthetase-like [Vitis vinifera]	116	1e-39
ColeSingleton11773	409	XP_002267519	PREDICTED: uncharacterized protein LOC100241277 [Vitis vinifera]	134	1e-29
ColeSingleton11776	480	AGD98713	aquaporin protein 10 [Camellia sinensis]	182	3e-44
ColeSingleton11778	314	XP_004150012	PREDICTED: acyl-protein thioesterase 2-like [Cucumis sativus] PREDICTED: acyl-protein thioesterase 2-like [Cucumis sativus]	65.5	2e-29
ColeSingleton11780	403	EMJ05160	hypothetical protein PRUPE_ppa000025mg [Prunus persica]	184	7e-45
ColeSingleton11782	484	XP_002284152	PREDICTED: calcium-binding mitochondrial carrier protein SCaMC-1-like [Vitis vinifera] unnamed protein product [Vitis vinifera]	140	1e-39
ColeSingleton11783	430	XP_002280968	PREDICTED: pentatricopeptide repeat-containing protein At1g19720-like [Vitis vinifera]	161	6e-38
ColeSingleton11785	466	EMJ15272	hypothetical protein PRUPE_ppa017743mg [Prunus persica]	167	8e-40
ColeSingleton11786	434	EMJ14485	hypothetical protein PRUPE_ppa000061mg [Prunus persica]	107	2e-41
ColeSingleton11787	457	XP_002274643	PREDICTED: methyl-CpG-binding domain-containing protein 9-like [Vitis vinifera]	62	2e-10
ColeSingleton11789	244	CAN64449	hypothetical protein VITISV_008912 [Vitis vinifera]	65.5	6e-09
ColeSingleton11790	410	XP_004232030	PREDICTED: uncharacterized protein LOC101268531 [Solanum lycopersicum]	237	1e-60
ColeSingleton11792	174	XP_004236615	PREDICTED: leucine-rich repeat receptor-like tyrosine-protein kinase At2g41820-like [Solanum lycopersicum]	93.6	2e-17
ColeSingleton11797	452	XP_004297744	PREDICTED: sacsin-like [Fragaria vesca subsp. vesca]	184	9e-45
ColeSingleton11798	487	XP_002528196	transcription factor, putative [Ricinus communis] transcription factor, putative [Ricinus communis]	76.3	1e-24
ColeSingleton11800	415	EOY33776	JOSEPHIN-like protein, putative [Theobroma cacao]	62	2e-13
ColeSingleton11802	264	XP_004305930	PREDICTED: uncharacterized protein LOC101297948 [Fragaria vesca subsp. vesca]	99.4	4e-19
ColeSingleton11807	480	XP_004135571	PREDICTED: ATP-citrate synthase alpha chain protein 2-like [Cucumis sativus] PREDICTED: ATP-citrate synthase alpha chain protein 2-like [Cucumis sativus]	250	1e-64
ColeSingleton11810	152	XP_003517416	PREDICTED: uncharacterized protein LOC100813529 [Glycine max]	63.2	7e-09
ColeSingleton11815	462	XP_002275614	PREDICTED: serine/threonine-protein kinase TOR-like isoform 2 [Vitis vinifera]	188	6e-46
ColeSingleton11819	325	CAC95126	gag-pol polyprotein [Populus deltoides]	57	3e-16
ColeSingleton11831	381	EOY01476	NAD(P)-binding Rossmann-fold superfamily protein isoform 1 [Theobroma cacao]	100	3e-21
ColeSingleton11835	266	XP_003628734	Translin-associated protein X [Medicago truncatula] Translin-associated protein X [Medicago truncatula]	48.9	1e-11
ColeSingleton11837	466	XP_002514918	protein with unknown function [Ricinus communis] protein with unknown function [Ricinus communis]	89.4	4e-16
ColeSingleton11840	382	EOY06016	RING/U-box superfamily protein [Theobroma cacao]	175	5e-42
ColeSingleton11841	416	CAN77652	hypothetical protein VITISV_032323 [Vitis vinifera]	224	1e-63
ColeSingleton11842	118	CAN64339	hypothetical protein VITISV_031562 [Vitis vinifera]	58.2	9e-07
ColeSingleton11843	272	XP_003633745	PREDICTED: EVI5-like protein-like [Vitis vinifera]	78.2	9e-13
ColeSingleton11845	401	XP_004505639	PREDICTED: uncharacterized protein LOC101503763 [Cicer arietinum]	213	2e-53
ColeSingleton11853	436	XP_002273428	PREDICTED: uncharacterized protein LOC100263135 [Vitis vinifera]	89.7	3e-16
ColeSingleton11854	449	CAN66817	hypothetical protein VITISV_034310 [Vitis vinifera]	81.6	2e-31
ColeSingleton11860	298	XP_004232834	PREDICTED: protein MOR1-like [Solanum lycopersicum]	71.2	1e-10
ColeSingleton11862	516	EOX98823	Endoplasmic reticulum vesicle transporter protein [Theobroma cacao]	183	2e-44
ColeSingleton11867	445	XP_004252198	PREDICTED: cyclin-dependent kinase E-1-like [Solanum lycopersicum]	289	2e-76
ColeSingleton11869	415	CAN63461	hypothetical protein VITISV_027321 [Vitis vinifera]	85.9	4e-15
ColeSingleton11872	447	YP_003909453	heavy metal efflux pump, CzcA family [Burkholderia sp. CCGE1003] cation transporter [Burkholderia sp. CCGE1003] heavy metal efflux pump, CzcA family [Burkholderia sp. CCGE1003]	167	1e-39
ColeSingleton11875	483	EOA35347	hypothetical protein CARUB_v10020535mg, partial [Capsella rubella]	43.9	8e-06
ColeSingleton11876	165	XP_004291206	PREDICTED: uncharacterized protein LOC101310663 [Fragaria vesca subsp. vesca]	59.3	4e-07
ColeSingleton11884	491	EOY09725	Uncharacterized protein TCM_025117 [Theobroma cacao]	179	4e-43
ColeSingleton11885	448	EOY06439	RING/U-box superfamily protein, putative isoform 2 [Theobroma cacao]	140	1e-31
ColeSingleton11887	440	XP_004229839	PREDICTED: probable methyltransferase PMT15-like [Solanum lycopersicum]	261	5e-68
ColeSingleton11888	458	XP_004143485	PREDICTED: uncharacterized protein LOC101213526 [Cucumis sativus]	216	2e-58
ColeSingleton11889	458	XP_003566049	PREDICTED: rac-like GTP-binding protein 2-like [Brachypodium distachyon]	174	1e-41
ColeSingleton11894	497	XP_003838404	hypothetical protein LEMA_P113400.1 [Leptosphaeria maculans JN3] hypothetical protein LEMA_P113400.1 [Leptosphaeria maculans JN3]	109	3e-22
ColeSingleton11897	460	CBI16344	unnamed protein product [Vitis vinifera]	89.4	4e-16
ColeSingleton11898	478	XP_004240562	PREDICTED: uncharacterized protein LOC101264013 [Solanum lycopersicum]	150	1e-34
ColeSingleton11899	384	XP_002273246	PREDICTED: probable Xaa-Pro aminopeptidase P [Vitis vinifera] unnamed protein product [Vitis vinifera]	125	1e-40
ColeSingleton11903	321	XP_002285410	PREDICTED: uncharacterized protein LOC100249264 [Vitis vinifera]	196	2e-48
ColeSingleton11907	263	BAD91202	mitochondrial F1-ATPase gamma subunit [Ipomoea nil]	42.4	6e-07
ColeSingleton11909	233	CAN68288	hypothetical protein VITISV_017017 [Vitis vinifera]	48.9	3e-12
ColeSingleton11910	529	XP_004515671	PREDICTED: mitogen-activated protein kinase kinase kinase 1-like isoform X1 [Cicer arietinum]	67	4e-16
ColeSingleton11911	270	XP_002277708	PREDICTED: uncharacterized protein LOC100241481 isoform 2 [Vitis vinifera]	43.9	6e-08
ColeSingleton11915	220	EMJ08062	hypothetical protein PRUPE_ppa1027174mg, partial [Prunus persica]	58.2	1e-06
ColeSingleton11916	308	XP_004239892	PREDICTED: rRNA-processing protein fcf2-like isoform 1 [Solanum lycopersicum] PREDICTED: rRNA-processing protein fcf2-like isoform 2 [Solanum lycopersicum]	60.5	2e-07
ColeSingleton11918	446	EOY25874	Alpha-galactosidase 2 [Theobroma cacao]	127	2e-54
ColeSingleton11922	122	EOY26499	Uncharacterized protein TCM_028280 [Theobroma cacao]	63.5	2e-08
ColeSingleton11928	421	XP_004287802	PREDICTED: multisite-specific tRNA:(cytosine-C(5))-methyltransferase trm4b-like [Fragaria vesca subsp. vesca]	83.6	2e-14
ColeSingleton11931	442	XP_002284323	PREDICTED: cold-inducible RNA-binding protein [Vitis vinifera] unnamed protein product [Vitis vinifera]	127	9e-28
ColeSingleton11933	386	XP_004303311	PREDICTED: uncharacterized protein LOC101299394 [Fragaria vesca subsp. vesca]	137	2e-30
ColeSingleton11936	158	XP_002526896	conserved hypothetical protein [Ricinus communis] conserved hypothetical protein [Ricinus communis]	50.8	4e-07
ColeSingleton11940	409	EPS60783	hypothetical protein M569_14016 [Genlisea aurea]	89.4	1e-19
ColeSingleton11944	257	XP_002279561	PREDICTED: uncharacterized protein LOC100256054 [Vitis vinifera] unnamed protein product [Vitis vinifera]	150	1e-34
ColeSingleton11945	429	EPQ27003	hypothetical protein PFL1_06895 [Pseudozyma flocculosa PF-1]	129	3e-28
ColeSingleton11946	353	CAN68711	hypothetical protein VITISV_015847 [Vitis vinifera]	98.2	1e-32
ColeSingleton11952	301	NP_001234849	hexose transporter 1 [Solanum lycopersicum] hexose transporter 1 [Solanum lycopersicum]	160	6e-43
ColeSingleton11957	307	XP_002330633	predicted protein [Populus trichocarpa] predicted protein [Populus trichocarpa]	119	1e-33
ColeSingleton11958	344	XP_002311552	ZIP transporter [Populus trichocarpa] ZIP transporter [Populus trichocarpa]	57.8	3e-17
ColeSingleton11959	380	XP_002280806	PREDICTED: uncharacterized protein LOC100242176 [Vitis vinifera]	108	7e-34
ColeSingleton11961	256	XP_004248373	PREDICTED: uncharacterized protein LOC101249026 [Solanum lycopersicum]	100	2e-19
ColeSingleton11963	348	XP_002528084	hypothetical protein RCOM_0643050 [Ricinus communis] hypothetical protein RCOM_0643050 [Ricinus communis]	67	2e-09
ColeSingleton11965	136	EMT30163	Callose synthase 4 [Aegilops tauschii]	87.4	1e-15
ColeSingleton11967	401	XP_003542770	PREDICTED: mitochondrial inner membrane protein OXA1-like [Glycine max]	95.1	7e-18
ColeSingleton11973	508	CBI34989	unnamed protein product [Vitis vinifera]	104	1e-20
ColeSingleton11979	288	XP_002299865	GRAS family transcription factor [Populus trichocarpa] GRAS family transcription factor [Populus trichocarpa]	51.6	2e-09
ColeSingleton11983	391	ADD31291	NADH-plastoquinone oxidoreductase subunit I protein [Rhododendron simsii]	45.1	4e-07
ColeSingleton11985	208	XP_004240881	PREDICTED: WEB family protein At2g38370-like [Solanum lycopersicum]	72.8	5e-12
ColeSingleton11994	485	XP_002300081	predicted protein [Populus trichocarpa] predicted protein [Populus trichocarpa]	94	2e-17
ColeSingleton11997	497	EME42084	hypothetical protein DOTSEDRAFT_73000 [Dothistroma septosporum NZE10]	147	3e-66
ColeSingleton11999	389	XP_004299027	PREDICTED: origin recognition complex subunit 4-like [Fragaria vesca subsp. vesca]	79.7	3e-13
ColeSingleton12001	377	XP_003624968	Dual specificity protein phosphatase [Medicago truncatula] Dual specificity protein phosphatase [Medicago truncatula]	117	4e-25
ColeSingleton12002	453	XP_004503017	PREDICTED: probable cation-transporting ATPase-like [Cicer arietinum]	131	9e-29
ColeSingleton12003	233	XP_002271755	PREDICTED: serine/threonine-protein kinase CTR1-like [Vitis vinifera]	96.7	2e-18
ColeSingleton12004	498	XP_004505942	PREDICTED: uncharacterized protein LOC101497319 [Cicer arietinum]	108	8e-22
ColeSingleton12006	243	XP_002276751	PREDICTED: eukaryotic translation initiation factor 2 subunit alpha [Vitis vinifera]	154	7e-36
ColeSingleton12015	370	EMJ24244	hypothetical protein PRUPE_ppa006937mg [Prunus persica]	86.7	2e-15
ColeSingleton12018	126	XP_004249981	PREDICTED: zinc finger A20 and AN1 domain-containing stress-associated protein 4-like isoform 1 [Solanum lycopersicum] PREDICTED: zinc finger A20 and AN1 domain-containing stress-associated protein 4-like isoform 2 [Solanum lycopersicum]	74.7	1e-11
ColeSingleton12022	206	XP_004231741	PREDICTED: nodulation receptor kinase-like [Solanum lycopersicum]	112	4e-23
ColeSingleton12023	392	XP_004489551	PREDICTED: elongation factor 1-alpha-like [Cicer arietinum] PREDICTED: elongation factor 1-alpha-like [Cicer arietinum]	215	3e-54
ColeSingleton12027	457	CAN76350	hypothetical protein VITISV_025245 [Vitis vinifera]	51.6	3e-06
ColeSingleton12028	324	CBI38228	unnamed protein product [Vitis vinifera]	120	1e-25
ColeSingleton12029	167	XP_004173091	PREDICTED: probable protein phosphatase 2C 63-like [Cucumis sativus]	82.4	5e-14
ColeSingleton12030	484	XP_002267415	PREDICTED: NEDD8-activating enzyme E1 regulatory subunit [Vitis vinifera] unnamed protein product [Vitis vinifera]	105	7e-21
ColeSingleton12031	477	XP_002262787	PREDICTED: uncharacterized protein LOC100246589 isoform 3 [Vitis vinifera]	186	4e-46
ColeSingleton12035	444	CAN60831	hypothetical protein VITISV_004737 [Vitis vinifera]	73.2	3e-11
ColeSingleton12036	382	XP_002284885	PREDICTED: ABC transporter G family member 32 [Vitis vinifera] unnamed protein product [Vitis vinifera]	88.6	6e-16
ColeSingleton12037	274	EMJ05792	hypothetical protein PRUPE_ppa003111mg [Prunus persica]	170	1e-40
ColeSingleton12041	442	XP_002299105	predicted protein [Populus trichocarpa] predicted protein [Populus trichocarpa]	85.1	7e-15
ColeSingleton12043	464	XP_002313026	predicted protein [Populus trichocarpa] predicted protein [Populus trichocarpa]	182	2e-54
ColeSingleton12045	445	XP_004249527	PREDICTED: uncharacterized protein LOC101259496 [Solanum lycopersicum]	130	1e-39
ColeSingleton12047	227	XP_003633580	PREDICTED: siroheme synthase-like [Vitis vinifera]	108	5e-22
ColeSingleton12051	241	XP_002272136	PREDICTED: E3 ubiquitin-protein ligase RMA1H1-like isoform 2 [Vitis vinifera] PREDICTED: E3 ubiquitin-protein ligase RMA1H1-like isoform 1 [Vitis vinifera]	51.2	1e-09
ColeSingleton12054	473	XP_004172502	PREDICTED: uncharacterized mitochondrial protein AtMg00810-like, partial [Cucumis sativus]	119	3e-25
ColeSingleton12059	155	XP_004242614	PREDICTED: cellulose synthase A catalytic subunit 7 [UDP-forming]-like [Solanum lycopersicum]	50.1	5e-07
ColeSingleton12060	190	EOY30747	Enoyl-CoA hydratase/isomerase family [Theobroma cacao]	100	2e-19
ColeSingleton12062	398	EOY29135	Arabinose kinase isoform 1 [Theobroma cacao] Arabinose kinase isoform 1 [Theobroma cacao] Arabinose kinase isoform 1 [Theobroma cacao] Arabinose kinase isoform 1 [Theobroma cacao] Arabinose kinase isoform 1 [Theobroma cacao] Arabinose kinase isoform 1 [Theobroma cacao]	261	6e-68
ColeSingleton12068	326	EMJ20953	hypothetical protein PRUPE_ppa024377mg [Prunus persica]	82.8	4e-14
ColeSingleton12069	485	XP_004233143	PREDICTED: uncharacterized protein LOC101253746 [Solanum lycopersicum]	233	2e-59
ColeSingleton12071	470	XP_002269404	PREDICTED: uncharacterized protein LOC100261513 [Vitis vinifera]	140	4e-37
ColeSingleton12072	417	EMJ02282	hypothetical protein PRUPE_ppa006950mg [Prunus persica]	55.5	6e-06
ColeSingleton12075	384	AEC11041	hypothetical protein [Camellia sinensis]	190	2e-46
ColeSingleton12076	246	XP_003517411	PREDICTED: peroxisomal acyl-coenzyme A oxidase 1-like [Glycine max]	60.1	2e-07
ColeSingleton12077	161	XP_004245835	PREDICTED: uncharacterized protein LOC101251207 [Solanum lycopersicum]	115	6e-24
ColeSingleton12080	310	EPS61599	hypothetical protein M569_13198, partial [Genlisea aurea]	92	6e-17
ColeSingleton12085	422	ADW83724	alpha-tubulin [Musa acuminata AAA Group]	49.3	2e-18
ColeSingleton12087	311	EMT32377	Putative beta-1,3-galactosyltransferase 8 [Aegilops tauschii]	67.4	2e-09
ColeSingleton12090	506	CAQ58626	Serine-threonine phosphatase type 1 [Vitis vinifera]	173	4e-82
ColeSingleton12092	482	XP_002318395	predicted protein [Populus trichocarpa] predicted protein [Populus trichocarpa]	75.9	4e-12
ColeSingleton12093	484	XP_004486276	PREDICTED: pentatricopeptide repeat-containing protein At3g62470, mitochondrial-like [Cicer arietinum]	209	3e-52
ColeSingleton12095	371	CAN78275	hypothetical protein VITISV_037788 [Vitis vinifera]	108	5e-22
ColeSingleton12100	486	CBI30560	unnamed protein product [Vitis vinifera]	250	5e-65
ColeSingleton12105	520	EOY21266	Mitogen-activated protein kinase 8 [Theobroma cacao]	63.2	3e-08
ColeSingleton12112	474	XP_002263822	PREDICTED: tubulin alpha-2 chain, partial [Vitis vinifera]	258	5e-67
ColeSingleton12119	401	XP_004306667	PREDICTED: E3 ubiquitin-protein ligase SINAT3-like [Fragaria vesca subsp. vesca]	285	5e-75
ColeSingleton12120	415	XP_002307666	predicted protein [Populus trichocarpa] predicted protein [Populus trichocarpa]	169	3e-40
ColeSingleton12122	219	XP_004248747	PREDICTED: uncharacterized protein LOC101250348 [Solanum lycopersicum]	52.8	1e-07
ColeSingleton12124	473	Q93Y92	RecName: Full=Non-symbiotic hemoglobin 2; AltName: Full=GOShi GLB2; Short=Hb2 non-symbiotic hemoglobin class 2 [Gossypium hirsutum]	181	2e-59
ColeSingleton12127	272	AFC90705	nucleotide-binding site leucine-rich repeat protein, partial [Rhododendron formosanum]	106	2e-21
ColeSingleton12128	362	XP_004289808	PREDICTED: uncharacterized protein LOC101292647 [Fragaria vesca subsp. vesca]	93.2	3e-17
ColeSingleton12136	434	XP_002263819	PREDICTED: uncharacterized protein At1g32220, chloroplastic [Vitis vinifera] unnamed protein product [Vitis vinifera]	192	3e-47
ColeSingleton12138	534	XP_002273353	PREDICTED: uncharacterized protein LOC100258188 [Vitis vinifera]	215	5e-54
ColeSingleton12139	419	EMJ20219	hypothetical protein PRUPE_ppa004364mg [Prunus persica]	115	4e-24
ColeSingleton12140	203	CBI34668	unnamed protein product [Vitis vinifera]	60.5	2e-07
ColeSingleton12150	388	EPS65778	fimbrin 1, partial [Genlisea aurea]	78.2	9e-13
ColeSingleton12153	293	XP_002281453	PREDICTED: uncharacterized protein LOC100252675 [Vitis vinifera]	56.2	4e-06
ColeSingleton12154	371	XP_002530790	protein binding protein, putative [Ricinus communis] protein binding protein, putative [Ricinus communis]	203	1e-50
ColeSingleton12156	478	CAN68860	hypothetical protein VITISV_023024 [Vitis vinifera]	77	2e-12
ColeSingleton12158	405	CAN61798	hypothetical protein VITISV_044291 [Vitis vinifera]	122	9e-27
ColeSingleton12166	458	XP_004292505	PREDICTED: putative laccase-9-like [Fragaria vesca subsp. vesca]	215	5e-54
ColeSingleton12169	379	XP_004970905	PREDICTED: beta-glucosidase 4-like [Setaria italica]	94.7	9e-18
ColeSingleton12170	519	XP_002274969	PREDICTED: uncharacterized protein LOC100250760 [Vitis vinifera]	151	5e-37
ColeSingleton12172	403	XP_003614097	Ureide permease [Medicago truncatula] Ureide permease [Medicago truncatula]	244	9e-63
ColeSingleton12176	478	XP_002531084	GTP cyclohydrolase I, putative [Ricinus communis] GTP cyclohydrolase I, putative [Ricinus communis]	160	1e-37
ColeSingleton12177	325	XP_004501040	PREDICTED: leishmanolysin-like isoform X1 [Cicer arietinum]	137	3e-37
ColeSingleton12180	500	EOY25073	DCD domain protein isoform 2 [Theobroma cacao]	162	3e-38
ColeSingleton12181	503	XP_002278913	PREDICTED: dihydroflavonol-4-reductase [Vitis vinifera] unnamed protein product [Vitis vinifera]	177	1e-42
ColeSingleton12184	404	XP_002283991	PREDICTED: uncharacterized protein LOC100264705 [Vitis vinifera] hypothetical protein VITISV_001275 [Vitis vinifera] unnamed protein product [Vitis vinifera]	154	7e-36
ColeSingleton12187	112	XP_003604105	Histone deacetylase [Medicago truncatula] Histone deacetylase [Medicago truncatula]	66.2	4e-10
ColeSingleton12193	502	XP_002274573	PREDICTED: translocase of chloroplast 34, chloroplastic [Vitis vinifera] unnamed protein product [Vitis vinifera]	153	2e-35
ColeSingleton12195	227	XP_003517288	PREDICTED: uncharacterized protein LOC100787845 [Glycine max]	55.1	8e-06
ColeSingleton12199	266	ABI17896	invertase inhibitor [Coffea canephora]	43.1	3e-09
ColeSingleton12200	408	WP_009187176	hypothetical protein [Cecembia lonarensis] hypothetical protein B879_04163 [Cecembia lonarensis LW9]	87.8	1e-15
ColeSingleton12202	468	XP_002299868	predicted protein [Populus trichocarpa] predicted protein [Populus trichocarpa]	123	2e-26
ColeSingleton12208	511	XP_002310640	predicted protein [Populus trichocarpa] predicted protein [Populus trichocarpa]	132	4e-29
ColeSingleton12210	332	EOY07096	Ferretin 1 isoform 2, partial [Theobroma cacao]	73.2	3e-11
ColeSingleton12216	268	XP_004306310	PREDICTED: uncharacterized protein LOC101308117 [Fragaria vesca subsp. vesca]	99.4	4e-19
ColeSingleton12217	377	XP_004236322	PREDICTED: kelch domain-containing protein 4-like [Solanum lycopersicum]	218	5e-55
ColeSingleton12221	420	XP_002274232	PREDICTED: uncharacterized protein LOC100266051 [Vitis vinifera]	63.9	2e-08
ColeSingleton12226	476	CAA73042	polyprotein [Ananas comosus]	223	2e-56
ColeSingleton12227	442	XP_003635602	PREDICTED: putative ribonuclease H protein At1g65750-like, partial [Vitis vinifera]	66.6	1e-19
ColeSingleton12229	484	CAN63105	hypothetical protein VITISV_029609 [Vitis vinifera]	123	1e-43
ColeSingleton12231	498	XP_002269504	PREDICTED: AP-4 complex subunit epsilon-like [Vitis vinifera]	197	1e-48
ColeSingleton12233	324	XP_003546505	PREDICTED: uncharacterized protein LOC100807621 [Glycine max]	170	1e-40
ColeSingleton12236	413	CAM73972	membrane protein [Magnetospirillum gryphiswaldense MSR-1]	55.1	8e-06
ColeSingleton12238	315	XP_002305192	predicted protein [Populus trichocarpa] predicted protein [Populus trichocarpa]	70.5	2e-10
ColeSingleton12239	210	XP_002331641	predicted protein [Populus trichocarpa] unknown [Populus trichocarpa] unknown [Populus trichocarpa] predicted protein [Populus trichocarpa]	135	4e-30
ColeSingleton12240	337	XP_003531725	PREDICTED: pyrophosphate-energized vacuolar membrane proton pump-like [Glycine max]	132	3e-29
ColeSingleton12241	229	EOY15736	Autoinhibited Ca2+-ATPase 1 isoform 2 [Theobroma cacao]	105	4e-21
ColeSingleton12243	295	EMJ27274	hypothetical protein PRUPE_ppa014053mg [Prunus persica]	105	7e-21
ColeSingleton12245	354	XP_002425209	conserved hypothetical protein [Pediculus humanus corporis] conserved hypothetical protein [Pediculus humanus corporis]	58.5	7e-07
ColeSingleton12253	463	EME41648	hypothetical protein DOTSEDRAFT_73896 [Dothistroma septosporum NZE10]	254	7e-66
ColeSingleton12256	443	EOY15682	Alpha/beta-Hydrolases superfamily protein [Theobroma cacao]	65.5	7e-20
ColeSingleton12257	409	EMJ26594	hypothetical protein PRUPE_ppa000690mg [Prunus persica]	126	3e-27
ColeSingleton12261	419	XP_002270550	PREDICTED: putative 3,4-dihydroxy-2-butanone kinase [Vitis vinifera] unnamed protein product [Vitis vinifera]	61.2	2e-15
ColeSingleton12263	363	CBI23697	unnamed protein product [Vitis vinifera]	139	2e-46
ColeSingleton12267	439	XP_002280533	PREDICTED: uncharacterized protein LOC100266246 [Vitis vinifera]	96.7	1e-23
ColeSingleton12268	502	EOY03777	Pollen Ole e 1 allergen and extensin family protein, putative [Theobroma cacao]	132	4e-34
ColeSingleton12269	339	EOY06994	S-adenosyl-L-methionine-dependent methyltransferases superfamily protein isoform 1 [Theobroma cacao]	94.4	8e-28
ColeSingleton12270	427	CAN78294	hypothetical protein VITISV_035517 [Vitis vinifera]	47.8	9e-10
ColeSingleton12271	157	AAZ08412	polyubiquitin [Populus alba]	86.7	2e-15
ColeSingleton12273	377	XP_003521494	PREDICTED: digalactosyldiacylglycerol synthase 1, chloroplastic-like [Glycine max]	220	1e-55
ColeSingleton12275	444	XP_003516498	PREDICTED: serine/threonine-protein kinase At5g01020-like [Glycine max]	189	3e-46
ColeSingleton12276	427	XP_004510004	PREDICTED: uncharacterized protein LOC101511496 [Cicer arietinum]	119	3e-25
ColeSingleton12282	219	XP_003551222	PREDICTED: ubiquitin-activating enzyme E1 1-like [Glycine max]	142	4e-32
ColeSingleton12285	414	XP_002278199	PREDICTED: uncharacterized protein LOC100258756 [Vitis vinifera] unnamed protein product [Vitis vinifera]	100	1e-19
ColeSingleton12286	498	EMJ23184	hypothetical protein PRUPE_ppa002846mg [Prunus persica]	173	2e-41
ColeSingleton12290	322	ACC91329	antimicrobial peptide snakin [Capsicum annuum] snakin [Capsicum annuum]	98.2	8e-19
ColeSingleton12291	401	XP_002511074	conserved hypothetical protein [Ricinus communis] conserved hypothetical protein [Ricinus communis]	149	2e-34
ColeSingleton12300	494	EMJ21855	hypothetical protein PRUPE_ppa003691mg [Prunus persica]	105	7e-21
ColeSingleton12308	409	ACU19532	unknown [Glycine max]	248	6e-64
ColeSingleton12312	425	EEE29591	ADP ribosylation factor, putative [Toxoplasma gondii VEG]	60.1	2e-07
ColeSingleton12314	406	EOY04503	Chromosome partition protein smc [Theobroma cacao]	175	5e-42
ColeSingleton12316	273	CCF23025	auxin influx carrier protein [Mangifera indica] auxin influx carrier component [Mangifera indica]	93.2	3e-17
ColeSingleton12321	254	XP_002961540	hypothetical protein SELMODRAFT_164833 [Selaginella moellendorffii] hypothetical protein SELMODRAFT_164833 [Selaginella moellendorffii]	38.9	1e-07
ColeSingleton12322	345	XP_004228593	PREDICTED: callose synthase 3-like [Solanum lycopersicum]	67	2e-09
ColeSingleton12323	478	XP_004247061	PREDICTED: cytochrome P450 82C4-like [Solanum lycopersicum]	156	3e-40
ColeSingleton12324	418	XP_002528196	transcription factor, putative [Ricinus communis] transcription factor, putative [Ricinus communis]	160	1e-37
ColeSingleton12333	216	XP_003539739	PREDICTED: V-type proton ATPase 116 kDa subunit a isoform 1-like [Glycine max]	59.7	3e-07
ColeSingleton12334	391	EOY02735	F28J7.14 protein, putative isoform 4 [Theobroma cacao]	67.8	1e-09
ColeSingleton12341	325	CBI19787	unnamed protein product [Vitis vinifera]	144	8e-33
ColeSingleton12346	445	EMJ05426	hypothetical protein PRUPE_ppa002742mg [Prunus persica]	253	1e-65
ColeSingleton12347	508	CAN65484	hypothetical protein VITISV_029474 [Vitis vinifera]	77.8	1e-24
ColeSingleton12349	164	XP_004487912	PREDICTED: choline-phosphate cytidylyltransferase B-like [Cicer arietinum]	62.4	5e-08
ColeSingleton12351	315	EOY12890	Nbs-lrr resistance protein [Theobroma cacao]	65.9	7e-14
ColeSingleton12353	401	XP_002270904	PREDICTED: protein WAX2 isoform 1 [Vitis vinifera]	82.8	4e-14
ColeSingleton12354	369	XP_002273769	PREDICTED: uncharacterized protein LOC100248988 [Vitis vinifera] unnamed protein product [Vitis vinifera]	95.9	4e-18
ColeSingleton12358	373	ADW83724	alpha-tubulin [Musa acuminata AAA Group]	150	2e-34
ColeSingleton12362	484	NP_001065493	Os10g0577700 [Oryza sativa Japonica Group] expressed protein [Oryza sativa Japonica Group] Os10g0577700 [Oryza sativa Japonica Group] unnamed protein product [Oryza sativa Japonica Group] unnamed protein product [Oryza sativa Japonica Group] hypothetical protein OsI_34782 [Oryza sativa Indica Group]	79	5e-13
ColeSingleton12365	363	EOY20683	Nodulin MtN3 family protein [Theobroma cacao]	138	5e-31
ColeSingleton12377	476	EOY12908	S-locus lectin protein kinase family protein [Theobroma cacao]	167	1e-39
ColeSingleton12378	464	XP_002264191	PREDICTED: fatty acid amide hydrolase [Vitis vinifera] unnamed protein product [Vitis vinifera]	112	3e-23
ColeSingleton12382	134	XP_004232662	PREDICTED: beta-catenin-like protein 1-like [Solanum lycopersicum]	85.1	7e-15
ColeSingleton12383	282	ABD65610	RNA recognition motif. (a.k.a. RRM, RBD, or RNP domain) containing protein [Brassica oleracea]	62.4	4e-19
ColeSingleton12384	366	XP_004138910	PREDICTED: aspartic proteinase-like protein 2-like [Cucumis sativus] PREDICTED: aspartic proteinase-like protein 2-like [Cucumis sativus]	127	1e-27
ColeSingleton12385	484	XP_004488764	PREDICTED: uncharacterized protein LOC101507232 isoform X1 [Cicer arietinum] PREDICTED: uncharacterized protein LOC101507232 isoform X2 [Cicer arietinum]	58.2	9e-07
ColeSingleton12387	355	EOA35052	hypothetical protein CARUB_v10020163mg [Capsella rubella]	167	1e-39
ColeSingleton12392	411	CAN78442	hypothetical protein VITISV_016799 [Vitis vinifera]	286	1e-75
ColeSingleton12394	446	XP_002264958	PREDICTED: protein EI24 homolog [Vitis vinifera] unnamed protein product [Vitis vinifera]	171	2e-57
ColeSingleton12399	384	XP_002278432	PREDICTED: uncharacterized protein LOC100247619 [Vitis vinifera]	62.8	4e-08
ColeSingleton12402	438	NP_187962	MAP3K epsilon protein kinase 1 [Arabidopsis thaliana] MAP3K epsilon protein kinase [Arabidopsis thaliana] MAP3K epsilon protein kinase 1 [Arabidopsis thaliana]	165	5e-39
ColeSingleton12405	436	EOX98739	White-brown complex protein 11 [Theobroma cacao]	202	3e-50
ColeSingleton12406	412	XP_004241333	PREDICTED: NAC domain-containing protein 89-like [Solanum lycopersicum]	80.5	2e-13
ColeSingleton12408	476	EOY30322	Nuclear transcription factor Y subunit A-3, putative isoform 1 [Theobroma cacao] Nuclear transcription factor Y subunit A-3, putative isoform 1 [Theobroma cacao] Nuclear transcription factor Y subunit A-3, putative isoform 1 [Theobroma cacao]	75.9	3e-18
ColeSingleton12411	188	XP_002330701	predicted protein [Populus trichocarpa] predicted protein [Populus trichocarpa]	89.7	3e-16
ColeSingleton12412	386	EMJ22744	hypothetical protein PRUPE_ppa005383mg [Prunus persica]	125	6e-27
ColeSingleton12416	427	XP_004230847	PREDICTED: RING-H2 finger protein ATL65-like [Solanum lycopersicum]	234	6e-60
ColeSingleton12423	329	NP_001234214	phototropin-1 [Solanum lycopersicum] phototropin-1 [Solanum lycopersicum]	159	1e-42
ColeSingleton12424	290	EMJ24373	hypothetical protein PRUPE_ppa009136mg [Prunus persica]	84.3	6e-26
ColeSingleton12425	245	CBI32022	unnamed protein product [Vitis vinifera]	129	3e-28
ColeSingleton12426	393	CAN71042	hypothetical protein VITISV_019062 [Vitis vinifera]	76.6	2e-17
ColeSingleton12429	263	AAD55269	sucrose transporter [Vitis vinifera]	94.4	1e-17
ColeSingleton12432	370	EMJ16308	hypothetical protein PRUPE_ppa012830mg [Prunus persica]	137	2e-30
ColeSingleton12435	453	XP_002277432	PREDICTED: uncharacterized protein LOC100247380 [Vitis vinifera]	108	6e-22
ColeSingleton12437	492	AFQ94050	auxin response factor 1 [Camellia sinensis]	246	1e-63
ColeSingleton12440	324	XP_004287314	PREDICTED: uncharacterized protein LOC101294976 [Fragaria vesca subsp. vesca]	59.3	4e-07
ColeSingleton12441	474	CBI25055	unnamed protein product [Vitis vinifera]	169	4e-40
ColeSingleton12446	248	XP_002267388	PREDICTED: receptor-like protein 12-like [Vitis vinifera]	83.6	2e-14
ColeSingleton12447	490	EMJ05461	hypothetical protein PRUPE_ppa001831mg [Prunus persica]	113	6e-32
ColeSingleton12448	482	XP_002270537	PREDICTED: E3 ubiquitin-protein ligase UBR2-like [Vitis vinifera]	219	2e-67
ColeSingleton12451	407	CAN81818	hypothetical protein VITISV_009635 [Vitis vinifera]	118	8e-25
ColeSingleton12453	372	EOY34462	Ribosomal L18p/L5e family protein isoform 1 [Theobroma cacao] Ribosomal L18p/L5e family protein isoform 1 [Theobroma cacao] Ribosomal L18p/L5e family protein isoform 1 [Theobroma cacao] Ribosomal L18p/L5e family protein isoform 1 [Theobroma cacao]	201	7e-50
ColeSingleton12454	464	XP_004136422	PREDICTED: uncharacterized protein LOC101205249 [Cucumis sativus] PREDICTED: uncharacterized protein LOC101224146 [Cucumis sativus]	134	1e-29
ColeSingleton12457	358	XP_002275229	PREDICTED: sphingoid base hydroxylase 2 [Vitis vinifera] unnamed protein product [Vitis vinifera]	251	6e-65
ColeSingleton12458	450	EKD19687	hypothetical protein MBM_01639 [Marssonina brunnea f. sp. 'multigermtubi' MB_m1]	224	8e-57
ColeSingleton12466	135	XP_004241238	PREDICTED: uncharacterized protein LOC101251687 [Solanum lycopersicum]	71.2	1e-10
ColeSingleton12467	401	EOY32887	Rho GTPase activation protein with PH domain isoform 4 [Theobroma cacao]	241	5e-62
ColeSingleton12471	275	XP_004238021	PREDICTED: rhamnogalacturonate lyase B-like [Solanum lycopersicum]	128	7e-28
ColeSingleton12472	461	XP_002326704	predicted protein [Populus trichocarpa] predicted protein [Populus trichocarpa]	241	6e-62
ColeSingleton12475	514	XP_003523219	PREDICTED: prolyl endopeptidase-like [Glycine max]	275	3e-72
ColeSingleton12480	184	XP_004509926	PREDICTED: dentin sialophosphoprotein-like [Cicer arietinum]	70.1	2e-10
ColeSingleton12483	389	XP_002325254	predicted protein [Populus trichocarpa] predicted protein [Populus trichocarpa]	140	2e-31
ColeSingleton12486	134	XP_002279401	PREDICTED: LOW QUALITY PROTEIN: transcription factor GTE10-like [Vitis vinifera]	72.4	5e-11
ColeSingleton12487	437	EOY27465	Peroxisome biogenesis protein 1 [Theobroma cacao]	229	2e-58
ColeSingleton12488	357	EOY09463	RNA-binding family protein isoform 3 [Theobroma cacao]	123	2e-26
ColeSingleton12489	315	CAN75646	hypothetical protein VITISV_031269 [Vitis vinifera]	83.2	3e-14
ColeSingleton12490	380	CAN61978	hypothetical protein VITISV_038568 [Vitis vinifera]	68.2	9e-10
ColeSingleton12494	361	XP_002322765	predicted protein [Populus trichocarpa] predicted protein [Populus trichocarpa]	180	2e-43
ColeSingleton12495	173	EOY30645	Kinase family protein with leucine-rich repeat domain, putative [Theobroma cacao]	69.7	3e-10
ColeSingleton1055	301	XP_002263747	PREDICTED: tRNA dimethylallyltransferase 2 [Vitis vinifera] unnamed protein product [Vitis vinifera]	97.1	2e-18
ColeSingleton1058	356	EMJ18246	hypothetical protein PRUPE_ppa001424mg [Prunus persica]	192	4e-47
ColeSingleton1059	310	XP_002268073	PREDICTED: pollen-specific protein C13 isoform 1 [Vitis vinifera] PREDICTED: pollen-specific protein C13 isoform 2 [Vitis vinifera] unnamed protein product [Vitis vinifera]	56.2	4e-06
ColeSingleton1063	399	EOY03526	Myb domain protein 106 [Theobroma cacao]	123	2e-26
ColeSingleton1065	505	EOY01551	Thioredoxin superfamily protein [Theobroma cacao]	163	6e-40
ColeSingleton1067	456	ELW65852	Brain-specific homeobox protein like protein [Tupaia chinensis]	73.9	2e-11
ColeSingleton1068	439	XP_004233049	PREDICTED: dihydroorotase, mitochondrial-like [Solanum lycopersicum]	276	2e-72
ColeSingleton1071	438	XP_004308781	PREDICTED: putative nuclease HARBI1-like [Fragaria vesca subsp. vesca]	47	6e-09
ColeSingleton1077	156	XP_002265658	PREDICTED: uncharacterized protein LOC100249925 [Vitis vinifera]	47.4	3e-11
ColeSingleton1081	500	XP_002265221	PREDICTED: uncharacterized protein LOC100263414 [Vitis vinifera]	77.4	2e-18
ColeSingleton1082	258	YP_786482	Filamentous hemagglutinin/adhesin [Bordetella avium 197N] Filamentous hemagglutinin/adhesin [Bordetella avium] Filamentous hemagglutinin/adhesin [Bordetella avium 197N]	34.7	5e-07
ColeSingleton1083	182	XP_004230876	PREDICTED: tRNA-dihydrouridine(47) synthase [NAD(P)(+)]-like [Solanum lycopersicum]	110	2e-22
ColeSingleton1093	346	XP_004301792	PREDICTED: uncharacterized protein LOC101300065 [Fragaria vesca subsp. vesca]	69.7	3e-10
ColeSingleton1095	189	XP_003547624	PREDICTED: uncharacterized protein LOC100306321 [Glycine max]	53.1	4e-11
ColeSingleton1096	440	XP_002274003	PREDICTED: uncharacterized protein LOC100259801 [Vitis vinifera]	96.3	3e-18
ColeSingleton1100	324	AAT38756	Putative methyltransferase family protein [Solanum demissum]	56.2	4e-06
ColeSingleton1101	472	ABF47292	selenocysteine methyltransferase [Camellia sinensis]	261	2e-72
ColeSingleton1103	523	XP_004230402	PREDICTED: TMV resistance protein N-like [Solanum lycopersicum]	81.3	6e-25
ColeSingleton1106	349	EOY16681	Nucleotide binding,nucleic acid binding [Theobroma cacao]	87.8	1e-15
ColeSingleton1107	509	XP_004238683	PREDICTED: AP-1 complex subunit gamma-2-like [Solanum lycopersicum]	159	6e-58
ColeSingleton1113	437	ABD93526	mitochondrial small ribosomal subunit protein [Nicotiana tomentosiformis]	246	2e-63
ColeSingleton1114	434	EMJ06076	hypothetical protein PRUPE_ppa001716mg [Prunus persica]	213	1e-53
ColeSingleton1120	161	AFK43309	unknown [Medicago truncatula]	107	1e-21
ColeSingleton1123	207	EGB08973	hypothetical protein AURANDRAFT_63528 [Aureococcus anophagefferens]	57.8	1e-06
ColeSingleton1127	223	EOX90874	Uncharacterized protein isoform 1 [Theobroma cacao] Uncharacterized protein isoform 1 [Theobroma cacao] Uncharacterized protein isoform 1 [Theobroma cacao]	122	3e-26
ColeSingleton1132	405	EOY20163	Potassium transporter 2 isoform 1 [Theobroma cacao] Potassium transporter 2 isoform 1 [Theobroma cacao] Potassium transporter 2 isoform 1 [Theobroma cacao] Potassium transporter 2 isoform 1 [Theobroma cacao] Potassium transporter 2 isoform 1 [Theobroma cacao]	62	7e-08
ColeSingleton1133	463	EMJ02967	hypothetical protein PRUPE_ppa000180mg [Prunus persica]	237	5e-64
ColeSingleton1135	431	XP_002268936	PREDICTED: probable amino acid permease 7 [Vitis vinifera] unnamed protein product [Vitis vinifera]	104	9e-21
ColeSingleton1138	460	EMJ21773	hypothetical protein PRUPE_ppa000074mg [Prunus persica]	198	2e-53
ColeSingleton1141	435	EOY00664	GDSL-like Lipase/Acylhydrolase superfamily protein isoform 1 [Theobroma cacao]	99.4	1e-24
ColeSingleton1144	494	BAE80321	cyclin dependent kinase B [Camellia sinensis]	194	1e-52
ColeSingleton1152	465	EHY53481	carbonyl reductase (NADPH) [Exophiala dermatitidis NIH/UT8656]	160	2e-37
ColeSingleton1155	351	XP_002320151	predicted protein [Populus trichocarpa] predicted protein [Populus trichocarpa]	76.6	1e-25
ColeSingleton12500	321	XP_002320232	pseudo response regulator [Populus trichocarpa] pseudo response regulator [Populus trichocarpa]	90.1	2e-16
ColeSingleton12502	522	XP_002283884	PREDICTED: transmembrane emp24 domain-containing protein bai isoform 1 [Vitis vinifera]	87	4e-24
ColeSingleton12503	486	XP_002284480	PREDICTED: sucrose nonfermenting 4-like protein-like isoform 1 [Vitis vinifera]	233	1e-72
ColeSingleton12504	469	XP_002521236	conserved hypothetical protein [Ricinus communis] conserved hypothetical protein [Ricinus communis]	127	8e-52
ColeSingleton12506	416	XP_004172099	PREDICTED: serine/threonine-protein kinase Nek5-like [Cucumis sativus]	60.8	1e-18
ColeSingleton12507	360	EOY16514	F-box/RNI-like superfamily protein isoform 1 [Theobroma cacao] F-box/RNI-like superfamily protein isoform 1 [Theobroma cacao]	204	6e-51
ColeSingleton12514	304	XP_002266185	PREDICTED: cell division control protein 48 homolog C-like [Vitis vinifera]	52	2e-10
ColeSingleton12516	408	XP_002265136	PREDICTED: uncharacterized protein LOC100246258 [Vitis vinifera]	155	1e-42
ColeSingleton12518	338	AFK47682	unknown [Medicago truncatula]	103	5e-33
ColeSingleton12522	452	XP_002276375	PREDICTED: uncharacterized protein LOC100256309 [Vitis vinifera] unnamed protein product [Vitis vinifera]	190	2e-46
ColeSingleton12523	297	AAG01180	opsin [Leptosphaeria maculans] Mac [synthetic construct]	80.5	2e-13
ColeSingleton12526	386	XP_002275630	PREDICTED: exportin-1 isoform 1 [Vitis vinifera] hypothetical protein VITISV_008353 [Vitis vinifera] unnamed protein product [Vitis vinifera]	171	1e-46
ColeSingleton12527	469	EMJ13125	hypothetical protein PRUPE_ppa010619mg [Prunus persica]	62.4	5e-08
ColeSingleton12529	154	ACJ70676	EIN3-like protein EIL3 [Actinidia deliciosa]	70.1	2e-10
ColeSingleton12536	462	EOY05183	Zinc finger family protein [Theobroma cacao]	139	3e-31
ColeSingleton12537	305	XP_004229519	PREDICTED: protein transport protein SEC23-like [Solanum lycopersicum]	147	9e-34
ColeSingleton12542	347	XP_004232265	PREDICTED: uncharacterized protein LOC101267183 [Solanum lycopersicum]	79.3	4e-13
ColeSingleton12547	333	WP_020240523	LysR family transcriptional regulator [Escherichia coli]	217	9e-55
ColeSingleton12549	484	XP_002303585	jumonji domain protein [Populus trichocarpa] jumonji domain protein [Populus trichocarpa]	207	7e-52
ColeSingleton12550	350	XP_002524430	conserved hypothetical protein [Ricinus communis] conserved hypothetical protein [Ricinus communis]	83.2	6e-18
ColeSingleton12552	372	EMJ26686	hypothetical protein PRUPE_ppa000105mg [Prunus persica]	108	5e-24
ColeSingleton12553	382	EOY12062	Zinc transporter 11 precursor [Theobroma cacao]	96.3	5e-20
ColeSingleton12554	395	XP_002267305	PREDICTED: serine/threonine-protein kinase HT1-like [Vitis vinifera]	41.2	3e-08
ColeSingleton12555	428	CAN79190	hypothetical protein VITISV_000232 [Vitis vinifera]	65.9	5e-09
ColeSingleton12557	406	EOY24011	Uncharacterized protein isoform 6, partial [Theobroma cacao] Uncharacterized protein isoform 6, partial [Theobroma cacao]	82	6e-14
ColeSingleton12567	225	XP_004171197	PREDICTED: polygalacturonase At1g48100-like, partial [Cucumis sativus]	67.4	2e-09
ColeSingleton12568	303	XP_002280699	PREDICTED: uncharacterized protein LOC100259697 [Vitis vinifera] unnamed protein product [Vitis vinifera]	72.8	4e-11
ColeSingleton12569	252	XP_002285126	PREDICTED: EIN3-binding F-box protein 1-like [Vitis vinifera]	65.1	8e-09
ColeSingleton12574	498	XP_002264834	PREDICTED: heterogeneous nuclear ribonucleoprotein Q [Vitis vinifera] unnamed protein product [Vitis vinifera]	224	1e-66
ColeSingleton12576	283	XP_004239169	PREDICTED: uncharacterized protein LOC101255095 [Solanum lycopersicum]	65.1	8e-09
ColeSingleton12577	489	CAN75987	hypothetical protein VITISV_012192 [Vitis vinifera]	262	3e-68
ColeSingleton12578	271	EMJ24455	hypothetical protein PRUPE_ppa009403mg [Prunus persica]	84.7	9e-15
ColeSingleton12579	472	XP_002532157	hypothetical protein RCOM_1158870 [Ricinus communis] hypothetical protein RCOM_1158870 [Ricinus communis]	108	5e-22
ColeSingleton12584	289	EMJ26654	hypothetical protein PRUPE_ppa000298mg [Prunus persica]	79	5e-13
ColeSingleton12585	169	XP_002331470	predicted protein [Populus trichocarpa] predicted protein [Populus trichocarpa]	84.3	1e-14
ColeSingleton12587	112	XP_002311552	ZIP transporter [Populus trichocarpa] ZIP transporter [Populus trichocarpa]	64.7	1e-08
ColeSingleton12588	437	XP_002323088	predicted protein [Populus trichocarpa] predicted protein [Populus trichocarpa]	134	2e-48
ColeSingleton12589	447	EOY09110	UDP-glcnac-adolichol phosphate glcnac-1-p-transferase [Theobroma cacao]	153	2e-35
ColeSingleton12596	450	EOY25630	Cysteine/Histidine-rich C1 domain family protein isoform 3 [Theobroma cacao]	58.2	9e-07
ColeSingleton12598	274	XP_004287681	PREDICTED: probable pectinesterase/pectinesterase inhibitor 12-like [Fragaria vesca subsp. vesca]	107	1e-21
ColeSingleton12601	392	AFK42442	unknown [Medicago truncatula]	258	6e-67
ColeSingleton12602	317	CAN77556	hypothetical protein VITISV_039374 [Vitis vinifera]	80.1	2e-13
ColeSingleton12603	503	XP_003552695	PREDICTED: heat shock cognate 70 kDa protein-like [Glycine max]	46.2	7e-10
ColeSingleton12604	417	CAN63630	hypothetical protein VITISV_018698 [Vitis vinifera]	78.6	7e-13
ColeSingleton12609	451	XP_003633162	PREDICTED: lysosomal Pro-X carboxypeptidase-like [Vitis vinifera] unnamed protein product [Vitis vinifera]	275	3e-72
ColeSingleton12612	397	XP_002272643	PREDICTED: leucine-rich repeat receptor-like protein CLAVATA2 [Vitis vinifera] unnamed protein product [Vitis vinifera]	169	4e-40
ColeSingleton12614	479	CAN81488	hypothetical protein VITISV_033286 [Vitis vinifera]	178	3e-46
ColeSingleton12621	305	XP_004148142	PREDICTED: trehalose-phosphate phosphatase A-like [Cucumis sativus] PREDICTED: trehalose-phosphate phosphatase A-like [Cucumis sativus]	60.8	1e-16
ColeSingleton12622	386	XP_002534135	Purple acid phosphatase precursor, putative [Ricinus communis] Purple acid phosphatase precursor, putative [Ricinus communis]	206	2e-51
ColeSingleton12626	474	XP_004310200	PREDICTED: lipoxygenase 6, choloroplastic-like [Fragaria vesca subsp. vesca]	174	4e-58
ColeSingleton12632	394	XP_004159219	PREDICTED: probable histone-lysine N-methyltransferase ATXR3-like [Cucumis sativus]	80.5	2e-13
ColeSingleton12634	470	XP_003633063	PREDICTED: pyruvate kinase, cytosolic isozyme isoform 2 [Vitis vinifera]	238	8e-68
ColeSingleton12637	440	EMJ25928	hypothetical protein PRUPE_ppa024829mg [Prunus persica]	85.9	4e-15
ColeSingleton12645	434	XP_002263835	PREDICTED: DNA-directed RNA polymerase I subunit RPA2 [Vitis vinifera]	271	4e-71
ColeSingleton12647	436	EPS73220	hypothetical protein M569_01537, partial [Genlisea aurea]	41.6	1e-07
ColeSingleton12650	435	XP_002274671	PREDICTED: uncharacterized protein LOC100243840 [Vitis vinifera]	258	6e-67
ColeSingleton12651	468	XP_003850817	putative major facilitator superfamily transporter [Zymoseptoria tritici IPO323] putative major facilitator superfamily transporter [Zymoseptoria tritici IPO323]	210	1e-52
ColeSingleton12652	489	EME49036	hypothetical protein DOTSEDRAFT_40277 [Dothistroma septosporum NZE10]	116	3e-24
ColeSingleton12653	326	ABK93292	unknown [Populus trichocarpa]	116	3e-24
ColeSingleton12656	248	AEB37537	TB1-like TCP family transcription factor [Helianthus annuus]	95.1	7e-18
ColeSingleton12657	378	EOX99422	Lorelei-like-gpi anchored protein 3, putative [Theobroma cacao]	129	3e-28
ColeSingleton12658	173	XP_002281123	PREDICTED: NADP-specific glutamate dehydrogenase-like [Vitis vinifera]	98.6	6e-19
ColeSingleton12663	423	XP_003305011	hypothetical protein PTT_17745 [Pyrenophora teres f. teres 0-1] hypothetical protein PTT_17745 [Pyrenophora teres f. teres 0-1]	270	9e-71
ColeSingleton12667	422	ABK95648	unknown [Populus trichocarpa]	117	3e-48
ColeSingleton12669	430	XP_002283775	PREDICTED: vegetative incompatibility protein HET-E-1-like [Vitis vinifera]	244	9e-63
ColeSingleton12674	275	XP_002306068	predicted protein [Populus trichocarpa] predicted protein [Populus trichocarpa]	68.2	9e-10
ColeSingleton12675	402	EOA15568	hypothetical protein CARUB_v10005227mg [Capsella rubella]	219	2e-55
ColeSingleton12677	423	XP_004233282	PREDICTED: subtilisin-like protease-like [Solanum lycopersicum]	230	3e-61
ColeSingleton12678	257	EPS67267	hypothetical protein M569_07509, partial [Genlisea aurea]	155	6e-36
ColeSingleton12680	492	CBI35060	unnamed protein product [Vitis vinifera]	136	7e-39
ColeSingleton12681	161	XP_002305487	predicted protein [Populus trichocarpa] predicted protein [Populus trichocarpa]	47.4	1e-06
ColeSingleton12684	152	XP_004246350	PREDICTED: acetyl-coenzyme A carboxylase carboxyl transferase subunit alpha, chloroplastic-like isoform 1 [Solanum lycopersicum] PREDICTED: acetyl-coenzyme A carboxylase carboxyl transferase subunit alpha, chloroplastic-like isoform 2 [Solanum lycopersicum]	84	2e-14
ColeSingleton12685	456	XP_004232282	PREDICTED: auxin-induced protein 5NG4-like [Solanum lycopersicum]	96.3	3e-18
ColeSingleton12689	306	XP_002533150	serine/arginine rich splicing factor, putative [Ricinus communis] serine/arginine rich splicing factor, putative [Ricinus communis]	110	1e-33
ColeSingleton12691	327	CBI18097	unnamed protein product [Vitis vinifera]	169	2e-40
ColeSingleton12694	479	EOY33820	RNA helicase, ATP-dependent, SK12/DOB1 protein isoform 4 [Theobroma cacao] RNA helicase, ATP-dependent, SK12/DOB1 protein isoform 4 [Theobroma cacao]	56.2	4e-06
ColeSingleton12696	205	EKX37108	ubiquitin [Guillardia theta CCMP2712]	66.6	3e-09
ColeSingleton12697	316	XP_002277047	PREDICTED: zinc finger protein ZPR1 homolog isoform 2 [Vitis vinifera]	64.3	1e-08
ColeSingleton12698	431	WP_000271779	thymidine kinase [Escherichia sp. TW09276]	203	1e-50
ColeSingleton12699	483	XP_002330765	predicted protein [Populus trichocarpa] predicted protein [Populus trichocarpa]	90.1	2e-16
ColeSingleton12700	341	CAN63634	hypothetical protein VITISV_009388 [Vitis vinifera]	92.8	3e-17
ColeSingleton12702	480	EMJ14085	hypothetical protein PRUPE_ppa021750mg, partial [Prunus persica]	124	1e-26
ColeSingleton12704	214	XP_002264683	PREDICTED: uncharacterized protein LOC100249313 isoform 1 [Vitis vinifera] PREDICTED: uncharacterized protein LOC100249313 isoform 2 [Vitis vinifera]	58.5	7e-07
ColeSingleton12705	432	ABC61504	AGO4-1, partial [Nicotiana benthamiana]	196	6e-55
ColeSingleton12707	420	NP_001268030	malate dehydrogenase [Vitis vinifera] malate dehydrogenase [Vitis vinifera]	124	7e-34
ColeSingleton12711	437	XP_003567821	PREDICTED: uncharacterized protein LOC100825290 [Brachypodium distachyon]	74.3	1e-37
ColeSingleton12714	456	XP_004234246	PREDICTED: uncharacterized LOC543641 [Solanum lycopersicum]	73.2	6e-18
ColeSingleton12717	298	XP_003553142	PREDICTED: putative nuclease HARBI1-like [Glycine max]	76.6	3e-12
ColeSingleton12719	438	XP_003526158	PREDICTED: transmembrane 9 superfamily member 4-like [Glycine max]	280	2e-73
ColeSingleton12721	355	XP_002281503	PREDICTED: uncharacterized protein LOC100262487 [Vitis vinifera]	107	3e-26
ColeSingleton12723	492	XP_002269811	PREDICTED: uncharacterized protein LOC100266589 [Vitis vinifera]	108	1e-35
ColeSingleton12724	362	CAN70924	hypothetical protein VITISV_043806 [Vitis vinifera]	73.9	7e-20
ColeSingleton12729	307	XP_002281360	PREDICTED: microtubule-associated protein TORTIFOLIA1-like [Vitis vinifera]	63.2	3e-08
ColeSingleton12734	488	XP_002270546	PREDICTED: LOW QUALITY PROTEIN: pentatricopeptide repeat-containing protein At3g02650, mitochondrial-like [Vitis vinifera]	70.9	1e-10
ColeSingleton12741	479	XP_002532577	transaldolase total2, putative [Ricinus communis] transaldolase total2, putative [Ricinus communis]	152	3e-35
ColeSingleton12745	515	XP_002891221	hypothetical protein ARALYDRAFT_314057 [Arabidopsis lyrata subsp. lyrata] hypothetical protein ARALYDRAFT_314057 [Arabidopsis lyrata subsp. lyrata]	66.6	8e-15
ColeSingleton12748	274	XP_002264071	PREDICTED: uncharacterized protein LOC100250210 [Vitis vinifera]	96.7	2e-18
ColeSingleton12749	232	XP_002271820	PREDICTED: pullulanase 1, chloroplastic-like [Vitis vinifera]	64.3	1e-08
ColeSingleton12751	458	EOY04578	BTB and TAZ domain protein 3 isoform 2 [Theobroma cacao]	240	1e-61
ColeSingleton12755	129	XP_002527682	3-5 exonuclease, putative [Ricinus communis] 3-5 exonuclease, putative [Ricinus communis]	59.3	4e-07
ColeSingleton12758	374	EOY10509	Leucine-rich repeat protein kinase family protein isoform 1 [Theobroma cacao] Leucine-rich repeat protein kinase family protein isoform 1 [Theobroma cacao]	132	4e-29
ColeSingleton12761	442	XP_002525969	DNA double-strand break repair rad50 ATPase, putative [Ricinus communis] DNA double-strand break repair rad50 ATPase, putative [Ricinus communis]	116	1e-43
ColeSingleton12762	273	CBI17455	unnamed protein product [Vitis vinifera]	145	3e-33
ColeSingleton12764	433	XP_004289461	PREDICTED: uncharacterized protein LOC101311229 [Fragaria vesca subsp. vesca]	85.1	2e-23
ColeSingleton12765	453	EOY22695	Uncharacterized protein TCM_014790 [Theobroma cacao]	161	4e-47
ColeSingleton12766	447	XP_004487750	PREDICTED: uncharacterized protein LOC101506788 [Cicer arietinum]	71.6	3e-20
ColeSingleton12767	245	XP_004239098	PREDICTED: ribonuclease H2 subunit B-like [Solanum lycopersicum]	112	1e-28
ColeSingleton12770	441	XP_004291695	PREDICTED: nicalin-1-like [Fragaria vesca subsp. vesca]	74.3	1e-11
ColeSingleton12772	463	XP_003526540	PREDICTED: GEM-like protein 1-like [Glycine max]	216	2e-54
ColeSingleton12774	294	XP_003633863	PREDICTED: TATA-binding protein-associated factor 172 isoform 2 [Vitis vinifera]	101	1e-32
ColeSingleton12777	161	XP_002531202	Protein C6orf55, putative [Ricinus communis] Protein C6orf55, putative [Ricinus communis]	83.6	2e-14
ColeSingleton12779	461	XP_004304589	PREDICTED: uncharacterized protein LOC101310436 [Fragaria vesca subsp. vesca]	113	2e-33
ColeSingleton12780	477	EOY31110	Uncharacterized protein isoform 1 [Theobroma cacao] Uncharacterized protein isoform 1 [Theobroma cacao]	66.6	3e-09
ColeSingleton12783	504	XP_004234227	PREDICTED: deSI-like protein At4g17486-like [Solanum lycopersicum]	91.3	1e-16
ColeSingleton12784	469	CAN74537	hypothetical protein VITISV_023717 [Vitis vinifera]	162	3e-38
ColeSingleton12785	323	XP_004235210	PREDICTED: uncharacterized protein LOC101249441 [Solanum lycopersicum]	124	1e-26
ColeSingleton12790	505	XP_002276245	PREDICTED: ATP-dependent helicase BRM-like [Vitis vinifera]	108	6e-36
ColeSingleton12791	345	XP_003634222	PREDICTED: omega-hydroxypalmitate O-feruloyl transferase-like [Vitis vinifera]	189	2e-46
ColeSingleton12792	476	XP_002311109	global transcription factor group [Populus trichocarpa] global transcription factor group [Populus trichocarpa]	125	5e-27
ColeSingleton12794	484	CBI15667	unnamed protein product [Vitis vinifera]	73.9	2e-11
ColeSingleton12797	422	XP_002269635	PREDICTED: uncharacterized protein LOC100251083, partial [Vitis vinifera]	74.3	1e-11
ColeSingleton12799	241	XP_002282284	PREDICTED: F-box/kelch-repeat protein At5g60570-like [Vitis vinifera]	116	2e-24
ColeSingleton12801	404	EMJ08353	hypothetical protein PRUPE_ppa000427mg [Prunus persica]	78.6	7e-13
ColeSingleton12802	433	XP_003631469	PREDICTED: disease resistance protein RPM1-like [Vitis vinifera]	97.1	2e-22
ColeSingleton12803	505	XP_002283875	PREDICTED: uncharacterized protein LOC100246370 [Vitis vinifera] unnamed protein product [Vitis vinifera]	57	8e-07
ColeSingleton12804	452	EOY02499	RNI-like superfamily protein [Theobroma cacao]	95.5	5e-18
ColeSingleton12805	459	EOY09974	Uncharacterized protein TCM_025345 [Theobroma cacao]	100	2e-19
ColeSingleton12807	475	XP_003524669	PREDICTED: F-box-like/WD repeat-containing protein TBL1XR1-like isoform 2 [Glycine max]	57	2e-06
ColeSingleton12809	411	EOY15264	Hedgehog receptor, putative isoform 1 [Theobroma cacao]	153	6e-49
ColeSingleton12810	173	XP_004296484	PREDICTED: subtilisin-like protease-like [Fragaria vesca subsp. vesca]	68.6	7e-10
ColeSingleton12814	336	XP_004302095	PREDICTED: probable lysine-specific demethylase JMJ14-like [Fragaria vesca subsp. vesca]	124	1e-26
ColeSingleton12821	302	XP_002278915	PREDICTED: E3 ubiquitin-protein ligase XBAT33 [Vitis vinifera] unnamed protein product [Vitis vinifera]	169	3e-40
ColeSingleton12823	436	EMJ22098	hypothetical protein PRUPE_ppa002662mg [Prunus persica]	129	4e-28
ColeSingleton12824	396	EHY57183	hypothetical protein HMPREF1120_05231 [Exophiala dermatitidis NIH/UT8656]	60.5	2e-07
ColeSingleton12830	176	XP_002264384	PREDICTED: cadmium-induced protein AS8 [Vitis vinifera] unnamed protein product [Vitis vinifera]	75.1	7e-12
ColeSingleton12832	498	CBI37139	unnamed protein product [Vitis vinifera]	80.1	2e-13
ColeSingleton12834	177	XP_002303774	predicted protein [Populus trichocarpa] predicted protein [Populus trichocarpa]	69.3	4e-10
ColeSingleton12835	197	XP_004156643	PREDICTED: uncharacterized protein LOC101223245 [Cucumis sativus]	85.9	4e-15
ColeSingleton12837	489	XP_002321297	multidrug resistance protein ABC transporter family [Populus trichocarpa] multidrug resistance protein ABC transporter family [Populus trichocarpa]	272	6e-75
ColeSingleton12842	476	XP_002274947	PREDICTED: uncharacterized protein LOC100253161 [Vitis vinifera] unnamed protein product [Vitis vinifera]	219	7e-66
ColeSingleton12843	233	EMJ12081	hypothetical protein PRUPE_ppa002815mg [Prunus persica]	103	2e-20
ColeSingleton12845	363	ACV87734	embryonic flower 2 [Camellia sinensis]	236	2e-60
ColeSingleton12846	375	XP_004230757	PREDICTED: E3 ubiquitin-protein ligase MARCH6-like [Solanum lycopersicum]	212	3e-53
ColeSingleton12851	415	XP_002264084	PREDICTED: uncharacterized protein LOC100250213 [Vitis vinifera] unnamed protein product [Vitis vinifera]	140	1e-31
ColeSingleton12854	157	EOX95528	Ribosomal RNA processing Brix domain protein isoform 3, partial [Theobroma cacao]	56.6	3e-06
ColeSingleton12857	462	XP_002309177	predicted protein [Populus trichocarpa] predicted protein [Populus trichocarpa]	143	2e-32
ColeSingleton12858	456	XP_002266779	PREDICTED: RNA-binding protein 38 [Vitis vinifera] unnamed protein product [Vitis vinifera]	178	5e-43
ColeSingleton12862	454	XP_004490956	PREDICTED: uncharacterized acetyltransferase At3g50280-like [Cicer arietinum]	199	6e-56
ColeSingleton12868	273	XP_002273000	PREDICTED: uncharacterized protein LOC100252015 [Vitis vinifera]	114	1e-27
ColeSingleton12869	171	XP_002284279	PREDICTED: NAC domain-containing protein 29-like [Vitis vinifera]	69.7	3e-10
ColeSingleton12873	430	XP_004288054	PREDICTED: uncharacterized protein LOC101299992 [Fragaria vesca subsp. vesca]	170	2e-40
ColeSingleton12875	407	XP_002526947	conserved hypothetical protein [Ricinus communis] conserved hypothetical protein [Ricinus communis]	101	7e-20
ColeSingleton12880	456	XP_002285664	PREDICTED: trans-2,3-enoyl-CoA reductase [Vitis vinifera]	149	3e-34
ColeSingleton12881	325	P07747	RecName: Full=Cytochrome b; AltName: Full=Complex III subunit 3; AltName: Full=Complex III subunit III; AltName: Full=Cytochrome b-c1 complex subunit 3; AltName: Full=Ubiquinol-cytochrome-c reductase complex cytochrome b subunit	189	4e-49
ColeSingleton12887	491	XP_002276449	PREDICTED: probable calcium-binding protein CML17 [Vitis vinifera]	144	1e-32
ColeSingleton12891	520	EMJ11968	hypothetical protein PRUPE_ppa020153mg [Prunus persica]	102	3e-20
ColeSingleton12892	394	XP_004172675	PREDICTED: LOW QUALITY PROTEIN: uncharacterized LOC101218097 [Cucumis sativus]	111	1e-33
ColeSingleton12895	221	NP_001105004	protoporphyrinogen IX oxidase (mitochondrial)2 [Zea mays] protoporphyrinogen IX oxidase [Zea mays]	65.1	6e-17
ColeSingleton12898	361	EMJ16748	hypothetical protein PRUPE_ppa007239mg [Prunus persica]	125	6e-37
ColeSingleton12899	352	XP_004231723	PREDICTED: protease 2-like [Solanum lycopersicum]	202	3e-50
ColeSingleton12903	541	CBI19623	unnamed protein product [Vitis vinifera]	222	2e-56
ColeSingleton12904	239	WP_009940169	hypothetical protein [Mycobacterium tuberculosis]	62.8	4e-08
ColeSingleton12905	257	XP_002279792	PREDICTED: protein MEI2-like 2-like [Vitis vinifera]	111	9e-23
ColeSingleton12907	283	EOY09814	Isopentenyl pyrophosphate:dimethylallyl pyrophosphate isomerase 2 [Theobroma cacao]	161	8e-38
ColeSingleton12908	376	EMT11824	Nuclease S1 [Aegilops tauschii]	72.8	4e-11
ColeSingleton12910	378	XP_004243282	PREDICTED: 2-aminoethanethiol dioxygenase-like isoform 2 [Solanum lycopersicum]	109	4e-22
ColeSingleton12911	498	XP_004230533	PREDICTED: potassium transporter 7-like [Solanum lycopersicum]	197	3e-59
ColeSingleton12912	420	XP_002313920	predicted protein [Populus trichocarpa] predicted protein [Populus trichocarpa]	106	2e-21
ColeSingleton12915	443	XP_002284065	PREDICTED: phosphoserine phosphatase, chloroplastic [Vitis vinifera] unnamed protein product [Vitis vinifera]	209	2e-52
ColeSingleton12921	516	EOX93820	P-loop containing nucleoside triphosphate hydrolases superfamily protein [Theobroma cacao]	178	6e-43
ColeSingleton12923	555	XP_003632755	PREDICTED: F-box/kelch-repeat protein At3g61590-like [Vitis vinifera]	203	9e-54
ColeSingleton12926	279	BAA01372	mitochondrial F1-ATPase beta subunit [Oryza sativa Japonica Group]	97.1	2e-37
ColeSingleton12928	250	XP_002309163	predicted protein [Populus trichocarpa] predicted protein [Populus trichocarpa]	58.2	9e-07
ColeSingleton12931	303	EMJ19547	hypothetical protein PRUPE_ppa010986mg [Prunus persica]	50.1	3e-10
ColeSingleton12936	432	EOY05511	REF4-related 1 [Theobroma cacao]	141	2e-32
ColeSingleton12942	336	XP_002327421	predicted protein [Populus trichocarpa] unknown [Populus trichocarpa] predicted protein [Populus trichocarpa]	75.5	6e-12
ColeSingleton12943	183	CAN79142	hypothetical protein VITISV_040460 [Vitis vinifera]	87.8	1e-15
ColeSingleton12962	456	NP_001267927	CBL-interacting protein kinase 14 [Vitis vinifera] CBL-interacting protein kinase 14 [Vitis vinifera] unnamed protein product [Vitis vinifera]	99.4	4e-19
ColeSingleton12969	226	XP_002513513	cinnamoyl-CoA reductase, putative [Ricinus communis] cinnamoyl-CoA reductase, putative [Ricinus communis]	76.3	3e-12
ColeSingleton12970	405	XP_003635289	PREDICTED: uncharacterized protein LOC100263199, partial [Vitis vinifera]	201	7e-50
ColeSingleton12971	470	EON69195	60S ribosomal protein L38 [Coniosporium apollinis CBS 100218]	72.4	5e-11
ColeSingleton12973	426	XP_004228679	PREDICTED: E3 ubiquitin-protein ligase SINAT2-like [Solanum lycopersicum]	278	3e-73
ColeSingleton12975	492	XP_002273712	PREDICTED: transcription initiation factor TFIID subunit 1-A-like [Vitis vinifera]	217	1e-64
ColeSingleton12977	389	XP_004233029	PREDICTED: histidinol dehydrogenase, chloroplastic-like [Solanum lycopersicum]	103	2e-20
ColeSingleton12978	289	XP_004159709	PREDICTED: probable inactive leucine-rich repeat receptor-like protein kinase At1g66830-like [Cucumis sativus]	128	6e-28
ColeSingleton12981	483	CBI24668	unnamed protein product [Vitis vinifera]	236	2e-60
ColeSingleton12983	284	EOY04987	S-adenosyl-L-methionine-dependent methyltransferases superfamily protein isoform 1 [Theobroma cacao] S-adenosyl-L-methionine-dependent methyltransferases superfamily protein isoform 1 [Theobroma cacao]	48.1	1e-09
ColeSingleton12985	485	EOY26932	MMS19 nucleotide excision repair protein, putative isoform 1 [Theobroma cacao] MMS19 nucleotide excision repair protein, putative isoform 1 [Theobroma cacao]	77	2e-12
ColeSingleton12987	382	CBI29548	unnamed protein product [Vitis vinifera]	79.7	6e-18
ColeSingleton12994	370	XP_004297806	PREDICTED: non-functional NADPH-dependent codeinone reductase 2-like [Fragaria vesca subsp. vesca]	66.2	3e-09
ColeSingleton13001	475	CBI38159	unnamed protein product [Vitis vinifera]	206	2e-64
ColeSingleton13003	494	XP_004306694	PREDICTED: probable indole-3-acetic acid-amido synthetase GH3.5-like [Fragaria vesca subsp. vesca]	165	5e-49
ColeSingleton13009	500	XP_002275197	PREDICTED: protein OSB2, chloroplastic [Vitis vinifera]	141	8e-32
ColeSingleton13010	479	EMJ09922	hypothetical protein PRUPE_ppa014888mg [Prunus persica]	75.1	7e-12
ColeSingleton13020	500	XP_002526695	monovalent cation:proton antiporter, putative [Ricinus communis] monovalent cation:proton antiporter, putative [Ricinus communis]	133	2e-29
ColeSingleton13021	208	CBP07430	sterol reductase [Solanum tuberosum]	84.3	1e-14
ColeSingleton13022	218	EMJ11091	hypothetical protein PRUPE_ppa004048mg [Prunus persica]	52.8	3e-13
ColeSingleton13024	238	XP_002272089	PREDICTED: probable WRKY transcription factor 28 [Vitis vinifera] unnamed protein product [Vitis vinifera]	79.7	3e-13
ColeSingleton13029	533	XP_002269977	PREDICTED: histidine kinase 2-like [Vitis vinifera]	246	3e-64
ColeSingleton13032	400	XP_002325146	predicted protein [Populus trichocarpa] predicted protein [Populus trichocarpa]	168	6e-40
ColeSingleton13033	235	CAN64078	hypothetical protein VITISV_041213 [Vitis vinifera]	66.2	3e-09
ColeSingleton13034	392	XP_002075201	GK16696 [Drosophila willistoni] GK16696 [Drosophila willistoni]	105	5e-21
ColeSingleton13037	440	EOX91518	2-oxoglutarate (2OG) and Fe(II)-dependent oxygenase superfamily protein isoform 1 [Theobroma cacao]	202	8e-53
ColeSingleton13040	410	EOX95766	Uncharacterized protein isoform 5 [Theobroma cacao]	80.9	1e-13
ColeSingleton13044	328	EPS59454	hypothetical protein M569_15352, partial [Genlisea aurea]	48.9	2e-11
ColeSingleton13045	458	XP_002263595	PREDICTED: DNA polymerase V-like [Vitis vinifera]	233	2e-59
ColeSingleton13059	429	EMJ22199	hypothetical protein PRUPE_ppa006615mg [Prunus persica] hypothetical protein PRUPE_ppa006615mg [Prunus persica]	163	3e-60
ColeSingleton13060	269	XP_002277950	PREDICTED: tRNA-specific adenosine deaminase, chloroplastic-like [Vitis vinifera]	58.9	2e-13
ColeSingleton13062	249	XP_002530800	Ocs element-binding factor, putative [Ricinus communis] Ocs element-binding factor, putative [Ricinus communis]	62	3e-10
ColeSingleton13065	191	XP_004496636	PREDICTED: carboxylesterase 1-like [Cicer arietinum]	44.7	8e-09
ColeSingleton13066	425	XP_002535241	conserved hypothetical protein [Ricinus communis] conserved hypothetical protein [Ricinus communis]	242	3e-62
ColeSingleton13068	296	XP_002266990	PREDICTED: uncharacterized protein LOC100257965 [Vitis vinifera]	48.5	4e-09
ColeSingleton13069	475	XP_004240895	PREDICTED: uncharacterized 38.1 kDa protein-like [Solanum lycopersicum]	127	6e-50
ColeSingleton13070	290	XP_003550205	PREDICTED: uncharacterized protein At2g39795, mitochondrial-like [Glycine max]	58.9	7e-12
ColeSingleton13072	507	EMJ04409	hypothetical protein PRUPE_ppa000207mg [Prunus persica]	60.5	5e-12
ColeSingleton13073	460	XP_004300933	PREDICTED: lysosomal beta glucosidase-like [Fragaria vesca subsp. vesca]	213	2e-53
ColeSingleton13075	250	XP_002308478	predicted protein [Populus trichocarpa] predicted protein [Populus trichocarpa]	162	5e-38
ColeSingleton13078	514	EOY33556	Nucleobase-ascorbate transporter 12 isoform 2 [Theobroma cacao]	181	1e-43
ColeSingleton13083	350	AAA66362	arabinogalactan-protein precursor [Nicotiana alata]	85.1	7e-15
ColeSingleton13086	325	XP_002268775	PREDICTED: probable receptor-like protein kinase At1g67000-like [Vitis vinifera]	153	2e-35
ColeSingleton13087	537	CBI21871	unnamed protein product [Vitis vinifera]	71.2	1e-10
ColeSingleton13091	511	XP_004512980	PREDICTED: protein CbxX, chromosomal-like [Cicer arietinum]	90.9	1e-16
ColeSingleton13093	475	CAN80061	hypothetical protein VITISV_007942 [Vitis vinifera]	50.4	1e-07
ColeSingleton13095	499	XP_002278970	PREDICTED: uncharacterized protein LOC100250252 [Vitis vinifera]	199	3e-49
ColeSingleton13097	195	CAN82711	hypothetical protein VITISV_004468 [Vitis vinifera]	72	6e-11
ColeSingleton13099	387	EMJ08343	hypothetical protein PRUPE_ppa001491mg [Prunus persica]	196	3e-55
ColeSingleton13100	241	XP_002525131	bromodomain-containing protein, putative [Ricinus communis] bromodomain-containing protein, putative [Ricinus communis]	115	5e-24
ColeSingleton13102	483	BAJ53114	JHL07K02.4 [Jatropha curcas]	89.4	8e-29
ColeSingleton13103	253	AEF13372	Dof-domain transcription factor protein [Platycodon grandiflorus]	99	5e-19
ColeSingleton13104	381	CBI30524	unnamed protein product [Vitis vinifera]	174	9e-42
ColeSingleton13105	491	EMS48927	Short-chain dehydrogenase/reductase family 42E member 1 [Triticum urartu]	172	9e-51
ColeSingleton13109	508	XP_002283237	PREDICTED: putative pentatricopeptide repeat-containing protein At1g53330-like [Vitis vinifera]	168	1e-43
ColeSingleton13110	316	XP_004243223	PREDICTED: transmembrane 9 superfamily member 4-like isoform 1 [Solanum lycopersicum] PREDICTED: transmembrane 9 superfamily member 4-like isoform 2 [Solanum lycopersicum]	116	2e-24
ColeSingleton13112	391	XP_004145731	PREDICTED: uncharacterized protein LOC101212965 [Cucumis sativus]	94	2e-17
ColeSingleton13114	353	EMJ17496	hypothetical protein PRUPE_ppa019444mg, partial [Prunus persica]	126	2e-27
ColeSingleton13118	250	XP_002274013	PREDICTED: uncharacterized protein LOC100241364 [Vitis vinifera]	91.3	1e-16
ColeSingleton13119	292	CBI24430	unnamed protein product [Vitis vinifera]	56.6	3e-06
ColeSingleton13123	452	XP_002531598	Rhomboid protein, putative [Ricinus communis] Rhomboid protein, putative [Ricinus communis]	111	9e-23
ColeSingleton13124	425	EMJ00905	hypothetical protein PRUPE_ppa001265mg [Prunus persica]	82	6e-14
ColeSingleton13130	357	XP_002271130	PREDICTED: uncharacterized protein LOC100266352 [Vitis vinifera]	186	2e-45
ColeSingleton13131	365	XP_004235385	PREDICTED: DNA polymerase epsilon subunit 2-like [Solanum lycopersicum]	121	9e-26
ColeSingleton13136	356	XP_001931333	40S ribosomal protein S1 [Pyrenophora tritici-repentis Pt-1C-BFP] 40S ribosomal protein S1 [Pyrenophora teres f. teres 0-1] RecName: Full=40S ribosomal protein S1 40S ribosomal protein S3aE-A [Pyrenophora tritici-repentis Pt-1C-BFP] hypothetical protein PTT_19476 [Pyrenophora teres f. teres 0-1]	171	6e-41
ColeSingleton13137	494	XP_004238299	PREDICTED: ocs element-binding factor 1-like [Solanum lycopersicum]	64.3	1e-08
ColeSingleton13140	335	XP_002274013	PREDICTED: uncharacterized protein LOC100241364 [Vitis vinifera]	85.9	4e-15
ColeSingleton13142	339	XP_004246463	PREDICTED: arginine biosynthesis bifunctional protein ArgJ, chloroplastic-like [Solanum lycopersicum]	201	7e-50
ColeSingleton13144	263	EOX94728	Ovate family protein 12, putative [Theobroma cacao]	104	1e-20
ColeSingleton13150	488	CAN60964	hypothetical protein VITISV_013873 [Vitis vinifera]	106	3e-33
ColeSingleton13158	491	XP_002270911	PREDICTED: serine/threonine protein phosphatase 2A 57 kDa regulatory subunit B' theta isoform [Vitis vinifera]	58.2	5e-10
ColeSingleton13159	437	EPS59734	hypothetical protein M569_15072, partial [Genlisea aurea]	68.2	9e-10
ColeSingleton13161	542	XP_002283273	PREDICTED: ATP-dependent zinc metalloprotease FTSH 10, mitochondrial [Vitis vinifera] unnamed protein product [Vitis vinifera]	165	6e-39
ColeSingleton13163	431	CAN74843	hypothetical protein VITISV_037042 [Vitis vinifera]	67	4e-23
ColeSingleton13165	228	NP_001240913	uncharacterized protein LOC100786817 [Glycine max] unknown [Glycine max]	110	2e-22
ColeSingleton13167	418	EOY17481	Uncharacterized protein isoform 2 [Theobroma cacao]	84.3	1e-14
ColeSingleton13169	332	XP_002307927	predicted protein [Populus trichocarpa] predicted protein [Populus trichocarpa]	53.5	3e-10
ColeSingleton13170	472	CAN66844	hypothetical protein VITISV_002365 [Vitis vinifera]	132	2e-55
ColeSingleton13172	410	CAN64220	hypothetical protein VITISV_014001 [Vitis vinifera]	79	5e-13
ColeSingleton13173	420	XP_002283812	PREDICTED: uncharacterized protein LOC100245429 [Vitis vinifera] unnamed protein product [Vitis vinifera]	152	5e-35
ColeSingleton13177	414	CAN83827	hypothetical protein VITISV_030947 [Vitis vinifera]	106	9e-24
ColeSingleton13179	401	XP_003552046	PREDICTED: 6-phosphofructokinase 5, chloroplastic-like [Glycine max]	80.5	2e-13
ColeSingleton13182	462	EMJ09426	hypothetical protein PRUPE_ppa018422mg, partial [Prunus persica]	58.5	2e-08
ColeSingleton13183	454	CAN73002	hypothetical protein VITISV_044056 [Vitis vinifera]	99.4	4e-19
ColeSingleton13189	497	XP_003638432	Craniofacial development protein [Medicago truncatula] Craniofacial development protein [Medicago truncatula]	71.2	1e-10
ColeSingleton13192	497	XP_003522828	PREDICTED: KH domain-containing protein At5g56140-like [Glycine max]	294	6e-78
ColeSingleton13194	441	XP_002527066	protein phsophatase-2a, putative [Ricinus communis] protein phsophatase-2a, putative [Ricinus communis]	311	4e-83
ColeSingleton13195	459	XP_002510103	cyclin d, putative [Ricinus communis] cyclin d, putative [Ricinus communis]	68.9	1e-10
ColeSingleton13199	347	NP_001238189	uncharacterized protein LOC100500188 [Glycine max] unknown [Glycine max]	97.1	2e-18
ColeSingleton13200	491	EMC98330	hypothetical protein BAUCODRAFT_32361 [Baudoinia compniacensis UAMH 10762]	168	5e-40
ColeSingleton13201	304	EOY04746	Phosphoglycerate mutase, 2,3-bisphosphoglycerate-independent isoform 1 [Theobroma cacao]	73.6	2e-11
ColeSingleton13204	401	XP_002526619	protein kinase, putative [Ricinus communis] protein kinase, putative [Ricinus communis]	145	6e-39
ColeSingleton13207	299	XP_004238878	PREDICTED: uncharacterized PKHD-type hydroxylase At1g22950-like [Solanum lycopersicum]	105	3e-34
ColeSingleton13208	190	EOY00688	Cytochrome P450 [Theobroma cacao]	71.6	8e-11
ColeSingleton13214	455	CBI24709	unnamed protein product [Vitis vinifera]	210	1e-52
ColeSingleton13218	321	XP_004242831	PREDICTED: probable methionine--tRNA ligase-like [Solanum lycopersicum]	152	4e-35
ColeSingleton13221	364	XP_002282350	PREDICTED: uncharacterized protein LOC100267859 [Vitis vinifera]	67.4	1e-12
ColeSingleton13224	150	AFX61784	somatic embryogenesis receptor-like kinase [Camellia nitidissima]	98.2	8e-19
ColeSingleton13226	221	XP_004248751	PREDICTED: putative fucosyltransferase-like protein-like [Solanum lycopersicum]	82	2e-21
ColeSingleton13227	515	XP_003605752	Pol polyprotein [Medicago truncatula] Pol polyprotein [Medicago truncatula]	90.9	3e-23
ColeSingleton13237	383	XP_002513816	protein with unknown function [Ricinus communis] protein with unknown function [Ricinus communis]	191	5e-47
ColeSingleton13238	333	XP_002319873	predicted protein [Populus trichocarpa] predicted protein [Populus trichocarpa]	52	3e-07
ColeSingleton13239	340	EPS66408	hypothetical protein M569_08364, partial [Genlisea aurea]	79.3	4e-13
ColeSingleton13240	400	WP_009187176	hypothetical protein [Cecembia lonarensis] hypothetical protein B879_04163 [Cecembia lonarensis LW9]	53.1	1e-07
ColeSingleton13244	462	XP_004152267	PREDICTED: mediator of RNA polymerase II transcription subunit 28-like [Cucumis sativus] PREDICTED: mediator of RNA polymerase II transcription subunit 28-like [Cucumis sativus]	95.1	2e-36
ColeSingleton13247	452	XP_003631670	PREDICTED: uncharacterized protein LOC100854716 [Vitis vinifera] hypothetical protein VITISV_001771 [Vitis vinifera] unnamed protein product [Vitis vinifera]	60.5	9e-10
ColeSingleton13249	353	XP_002534041	conserved hypothetical protein [Ricinus communis] conserved hypothetical protein [Ricinus communis]	102	3e-20
ColeSingleton13250	386	XP_004237192	PREDICTED: cyclin-SDS-like [Solanum lycopersicum]	89.4	4e-16
ColeSingleton13251	428	XP_004248288	PREDICTED: uncharacterized protein LOC101249403 [Solanum lycopersicum]	73.2	3e-11
ColeSingleton13253	456	XP_002274325	PREDICTED: uncharacterized protein LOC100242621 [Vitis vinifera]	214	8e-54
ColeSingleton13254	244	XP_002278678	PREDICTED: caffeoyl-CoA O-methyltransferase-like [Vitis vinifera]	76.6	3e-12
ColeSingleton13257	567	CAN70923	hypothetical protein VITISV_018909 [Vitis vinifera]	57.8	4e-12
ColeSingleton13258	489	CAC95126	gag-pol polyprotein [Populus deltoides]	60.1	2e-07
ColeSingleton13260	344	XP_004242019	PREDICTED: prolyl-tRNA synthetase associated domain-containing protein 1-like isoform 1 [Solanum lycopersicum]	104	6e-22
ColeSingleton13262	128	XP_004244504	PREDICTED: uncharacterized protein LOC101245780 [Solanum lycopersicum]	68.6	7e-10
ColeSingleton13264	437	CBI32226	unnamed protein product [Vitis vinifera]	56.2	8e-07
ColeSingleton13270	426	CBI28210	unnamed protein product [Vitis vinifera]	79	1e-14
ColeSingleton13272	173	XP_004293979	PREDICTED: histidinol dehydrogenase, chloroplastic-like [Fragaria vesca subsp. vesca]	100	5e-20
ColeSingleton13273	424	XP_003554372	PREDICTED: WD repeat-containing protein 20-like [Glycine max]	184	2e-47
ColeSingleton13274	264	CAN75419	hypothetical protein VITISV_033984 [Vitis vinifera]	80.5	2e-13
ColeSingleton13275	445	XP_003593788	Aquaporin NIP1-2 [Medicago truncatula] Aquaporin NIP1-2 [Medicago truncatula]	162	2e-60
ColeSingleton13276	291	XP_004308112	PREDICTED: uncharacterized protein LOC101300963 [Fragaria vesca subsp. vesca]	146	2e-33
ColeSingleton13279	314	XP_002512451	serine/threonine protein phosphatase, putative [Ricinus communis] serine/threonine protein phosphatase, putative [Ricinus communis]	83.6	2e-14
ColeSingleton13280	405	EOX95058	Nucleolar protein 16 [Theobroma cacao]	187	1e-45
ColeSingleton13282	359	XP_003632578	PREDICTED: dnaJ homolog subfamily B member 13 isoform 3 [Vitis vinifera]	114	1e-23
ColeSingleton13283	213	XP_004232517	PREDICTED: aspartic proteinase-like protein 1-like [Solanum lycopersicum]	79	5e-13
ColeSingleton13285	431	CBI21387	unnamed protein product [Vitis vinifera]	120	2e-25
ColeSingleton13286	417	AFX67038	fructokinase 3 [Solanum tuberosum]	170	1e-40
ColeSingleton13291	213	NP_001059023	Os07g0176900 [Oryza sativa Japonica Group] putative ribose-5-phosphate isomerase [Oryza sativa Japonica Group] Os07g0176900 [Oryza sativa Japonica Group] hypothetical protein OsJ_23301 [Oryza sativa Japonica Group] unnamed protein product [Oryza sativa Japonica Group] hypothetical protein OsI_25096 [Oryza sativa Indica Group]	90.1	2e-16
ColeSingleton13292	134	XP_002330671	predicted protein [Populus trichocarpa] predicted protein [Populus trichocarpa]	61.2	7e-09
ColeSingleton13297	186	EEE27870	glycine-rich RNA-binding protein, putative [Toxoplasma gondii VEG]	56.6	3e-06
ColeSingleton13299	505	CAN73351	hypothetical protein VITISV_027250 [Vitis vinifera]	43.1	3e-07
ColeSingleton13306	363	S14115	NADH2 dehydrogenase (ubiquinone) (EC 1.6.5.3) chain 5, truncated - sugar beet mitochondrion	84.7	2e-15
ColeSingleton13311	233	XP_002275108	PREDICTED: patatin group A-3-like [Vitis vinifera]	121	7e-26
ColeSingleton13313	344	EOY05349	P-loop containing nucleoside triphosphate hydrolases superfamily protein, putative [Theobroma cacao]	86.3	3e-15
ColeSingleton13314	101	XP_002526784	acyltransferase, putative [Ricinus communis] acyltransferase, putative [Ricinus communis]	57.4	2e-06
ColeSingleton13315	461	CBI16448	unnamed protein product [Vitis vinifera]	260	9e-68
ColeSingleton13322	436	XP_004156751	PREDICTED: LOW QUALITY PROTEIN: cytochrome P450 89A2-like [Cucumis sativus]	113	2e-33
ColeSingleton13323	201	ABD28426	RNA-directed DNA polymerase (Reverse transcriptase) [Medicago truncatula]	83.2	3e-14
ColeSingleton13324	280	XP_002273863	PREDICTED: uncharacterized protein LOC100243219 [Vitis vinifera]	110	1e-22
ColeSingleton13327	532	EOY07175	Transducin family protein / WD-40 repeat family protein, putative isoform 5, partial [Theobroma cacao]	60.8	2e-07
ColeSingleton13330	180	XP_002284621	PREDICTED: uncharacterized protein LOC100245350 [Vitis vinifera]	69.7	3e-10
ColeSingleton13332	397	CBI27954	unnamed protein product [Vitis vinifera]	183	3e-45
ColeSingleton13339	442	XP_002302707	predicted protein [Populus trichocarpa] predicted protein [Populus trichocarpa]	88.2	3e-33
ColeSingleton13340	190	XP_002273000	PREDICTED: uncharacterized protein LOC100252015 [Vitis vinifera]	85.5	6e-15
ColeSingleton13341	492	EMJ16119	hypothetical protein PRUPE_ppa000756mg [Prunus persica]	188	5e-46
ColeSingleton13343	476	XP_003631992	PREDICTED: uncharacterized N-acetyltransferase p20 [Vitis vinifera]	192	4e-47
ColeSingleton13346	384	XP_004294819	PREDICTED: ycf20-like protein-like [Fragaria vesca subsp. vesca]	90.9	1e-16
ColeSingleton13347	426	CBI24699	unnamed protein product [Vitis vinifera]	234	7e-61
ColeSingleton13348	374	EMJ23021	hypothetical protein PRUPE_ppa002962mg [Prunus persica]	182	3e-44
ColeSingleton13350	387	XP_004300417	PREDICTED: oxysterol-binding protein-related protein 3C-like [Fragaria vesca subsp. vesca]	233	2e-59
ColeSingleton13351	343	XP_002327394	predicted protein [Populus trichocarpa] predicted protein [Populus trichocarpa]	63.9	6e-14
ColeSingleton13354	366	CAN68155	hypothetical protein VITISV_040299 [Vitis vinifera]	55.5	7e-11
ColeSingleton13357	317	XP_003618905	L-2-hydroxyglutarate dehydrogenase [Medicago truncatula] L-2-hydroxyglutarate dehydrogenase [Medicago truncatula]	183	1e-44
ColeSingleton13359	415	CBI29964	unnamed protein product [Vitis vinifera]	235	3e-60
ColeSingleton13361	426	EMJ09496	hypothetical protein PRUPE_ppa003260mg [Prunus persica]	140	1e-31
ColeSingleton13367	475	EOA39482	hypothetical protein CARUB_v10008087mg [Capsella rubella]	157	9e-37
ColeSingleton13369	471	XP_003633592	PREDICTED: transcription factor bHLH130-like [Vitis vinifera]	73.9	2e-11
ColeSingleton13371	386	EMJ14120	hypothetical protein PRUPE_ppa022294mg, partial [Prunus persica]	72.8	4e-11
ColeSingleton13372	126	EOY30912	Pleiotropic drug resistance 4 [Theobroma cacao]	79	5e-13
ColeSingleton13375	402	XP_003542592	PREDICTED: uncharacterized protein LOC100786697 [Glycine max]	153	2e-35
ColeSingleton13380	447	EOY28442	Inositol monophosphatase family protein isoform 1 [Theobroma cacao]	125	2e-27
ColeSingleton13381	459	XP_002275775	PREDICTED: zinc finger CCCH domain-containing protein 12 [Vitis vinifera] unnamed protein product [Vitis vinifera]	72.4	5e-11
ColeSingleton13384	138	XP_002304279	mtn21-like protein [Populus trichocarpa] mtn21-like protein [Populus trichocarpa]	68.9	5e-10
ColeSingleton13387	436	XP_002331561	predicted protein [Populus trichocarpa] predicted protein [Populus trichocarpa]	103	4e-23
ColeSingleton13388	252	XP_002514305	conserved hypothetical protein [Ricinus communis] conserved hypothetical protein [Ricinus communis]	68.6	7e-12
ColeSingleton13393	367	XP_001953743	GF17078 [Drosophila ananassae] GF17078 [Drosophila ananassae]	58.5	7e-07
ColeSingleton13394	318	XP_002285370	PREDICTED: actin-related protein 3 [Vitis vinifera]	148	2e-48
ColeSingleton13395	269	AGB05602	sn-glycerol-3-phosphate acyltransferase [Camellia oleifera]	78.6	7e-13
ColeSingleton13396	405	2HS8	Chain A, Crystal Structure Of The Y364f Mutant Of 12- Oxophytodienoate Reductase 3 From Tomato Chain B, Crystal Structure Of The Y364f Mutant Of 12- Oxophytodienoate Reductase 3 From Tomato	168	5e-40
ColeSingleton13399	225	XP_004146431	PREDICTED: rhodanese-like domain-containing protein 7-like [Cucumis sativus] PREDICTED: rhodanese-like domain-containing protein 7-like [Cucumis sativus]	81.6	8e-14
ColeSingleton13400	391	XP_004500035	PREDICTED: glucose-6-phosphate/phosphate translocator 1, chloroplastic-like isoform X1 [Cicer arietinum] PREDICTED: glucose-6-phosphate/phosphate translocator 1, chloroplastic-like isoform X2 [Cicer arietinum]	210	3e-62
ColeSingleton13401	204	XP_004229794	PREDICTED: Golgi SNAP receptor complex member 1-2-like [Solanum lycopersicum]	60.8	1e-16
ColeSingleton13404	283	XP_002280577	PREDICTED: uncharacterized protein LOC100244977 [Vitis vinifera] unnamed protein product [Vitis vinifera]	93.2	3e-17
ColeSingleton13406	228	AAF79618	F5M15.26 [Arabidopsis thaliana]	90.1	2e-16
ColeSingleton13408	480	EOY24553	Nudix hydrolase [Theobroma cacao]	263	1e-68
ColeSingleton13409	397	XP_001936717	conserved hypothetical protein [Pyrenophora tritici-repentis Pt-1C-BFP] conserved hypothetical protein [Pyrenophora tritici-repentis Pt-1C-BFP]	135	4e-30
ColeSingleton13412	370	XP_004492459	PREDICTED: uncharacterized protein LOC101492059 [Cicer arietinum]	65.9	4e-09
ColeSingleton13415	388	XP_002279425	PREDICTED: putative methyltransferase NSUN5-like [Vitis vinifera]	171	1e-40
ColeSingleton13416	345	AEC11051	anthocyanin 3-o-galactosyl transferase [Camellia sinensis]	74.3	2e-25
ColeSingleton13418	278	XP_004232927	PREDICTED: trans-resveratrol di-O-methyltransferase-like [Solanum lycopersicum]	77.8	1e-12
ColeSingleton13421	342	XP_004163086	PREDICTED: LOW QUALITY PROTEIN: glutamate synthase [NADH], amyloplastic-like [Cucumis sativus]	213	2e-53
ColeSingleton13423	492	XP_004305608	PREDICTED: pentatricopeptide repeat-containing protein At4g33170-like [Fragaria vesca subsp. vesca]	92	2e-20
ColeSingleton13427	381	XP_004251963	PREDICTED: putative clathrin assembly protein At5g57200-like [Solanum lycopersicum]	78.2	9e-13
ColeSingleton13430	411	EMJ00311	hypothetical protein PRUPE_ppa020728mg [Prunus persica]	95.1	7e-18
ColeSingleton13431	491	XP_002284930	PREDICTED: xylogalacturonan beta-1,3-xylosyltransferase isoform 1 [Vitis vinifera]	251	8e-65
ColeSingleton13434	453	XP_002276237	PREDICTED: uncharacterized protein LOC100242423 [Vitis vinifera]	162	2e-43
ColeSingleton13439	343	XP_002524944	Polyadenylation factor subunit, putative [Ricinus communis] Polyadenylation factor subunit, putative [Ricinus communis]	157	1e-36
ColeSingleton13442	370	XP_002277259	PREDICTED: protein IQ-DOMAIN 31-like [Vitis vinifera]	72	2e-19
ColeSingleton13444	431	EMJ23141	hypothetical protein PRUPE_ppa001575mg [Prunus persica]	218	2e-56
ColeSingleton13446	302	AFK41217	unknown [Lotus japonicus]	120	4e-38
ColeSingleton13456	310	XP_002307132	predicted protein [Populus trichocarpa] predicted protein [Populus trichocarpa] predicted protein [Populus trichocarpa] predicted protein [Populus trichocarpa]	96.3	3e-18
ColeSingleton13458	487	XP_004230156	PREDICTED: uncharacterized protein LOC101254240 [Solanum lycopersicum]	93.6	2e-20
ColeSingleton13459	319	XP_002266685	PREDICTED: transcription factor BIM2-like [Vitis vinifera] unnamed protein product [Vitis vinifera]	72.8	4e-11
ColeSingleton13466	459	CBI15285	unnamed protein product [Vitis vinifera]	153	2e-35
ColeSingleton13467	529	XP_002263078	PREDICTED: trehalose-phosphate phosphatase [Vitis vinifera] unnamed protein product [Vitis vinifera]	145	6e-33
ColeSingleton13470	519	CAN78903	hypothetical protein VITISV_026451 [Vitis vinifera]	74.3	7e-16
ColeSingleton13474	398	XP_003633350	PREDICTED: protein BONZAI 3-like [Vitis vinifera]	115	5e-24
ColeSingleton13477	529	XP_002271456	PREDICTED: histidyl-tRNA synthetase-like [Vitis vinifera]	89	8e-22
ColeSingleton13485	562	XP_003553092	PREDICTED: uncharacterized protein LOC100807161 [Glycine max]	56.6	3e-06
ColeSingleton13487	402	XP_004251725	PREDICTED: TBC1 domain family member 15-like isoform 1 [Solanum lycopersicum]	83.6	1e-20
ColeSingleton13489	301	EOY13091	ARM repeat superfamily protein [Theobroma cacao]	124	1e-26
ColeSingleton13490	493	AFC90230	nucleotide-binding site leucine-rich repeat protein, partial [Rhododendron formosanum]	145	3e-33
ColeSingleton13494	474	XP_004249681	PREDICTED: uncharacterized protein LOC101253847 [Solanum lycopersicum]	150	4e-41
ColeSingleton13496	378	CAN78776	hypothetical protein VITISV_029750 [Vitis vinifera]	67.4	2e-09
ColeSingleton13498	403	AGD98710	aquaporin protein 7 [Camellia sinensis]	148	5e-34
ColeSingleton13499	548	EOY22931	Low psii accumulation2, putative [Theobroma cacao]	161	7e-38
ColeSingleton13500	443	XP_004305915	PREDICTED: uncharacterized protein LOC101293333 [Fragaria vesca subsp. vesca]	119	4e-25
ColeSingleton13501	528	CAN76392	hypothetical protein VITISV_011465 [Vitis vinifera]	68.6	2e-10
ColeSingleton13504	382	ABG34283	pectin acetylesterase [Eucalyptus globulus subsp. globulus]	50.1	2e-13
ColeSingleton13507	392	XP_004248849	PREDICTED: chloride channel protein CLC-c-like [Solanum lycopersicum]	184	9e-45
ColeSingleton13513	423	XP_002327171	predicted protein [Populus trichocarpa] predicted protein [Populus trichocarpa]	84.3	1e-14
ColeSingleton13515	492	XP_003632264	PREDICTED: uncharacterized protein LOC100854602 [Vitis vinifera]	139	4e-62
ColeSingleton13518	401	CAN82620	hypothetical protein VITISV_002311 [Vitis vinifera]	88.6	7e-16
ColeSingleton13519	414	XP_004238127	PREDICTED: uncharacterized protein LOC101246050 [Solanum lycopersicum]	53.9	4e-09
ColeSingleton13522	477	XP_002265814	PREDICTED: 65-kDa microtubule-associated protein 5-like [Vitis vinifera]	119	3e-25
ColeSingleton13524	464	XP_002265807	PREDICTED: urease accessory protein UreF-like isoform 1 [Vitis vinifera]	187	1e-45
ColeSingleton13526	428	EOY08878	Calcium and calcium/calmodulin-dependent serine/threonine-protein kinase isoform 1 [Theobroma cacao] Calcium and calcium/calmodulin-dependent serine/threonine-protein kinase isoform 1 [Theobroma cacao] Calcium and calcium/calmodulin-dependent serine/threonine-protein kinase isoform 1 [Theobroma cacao] Calcium and calcium/calmodulin-dependent serine/threonine-protein kinase isoform 1 [Theobroma ca…	184	6e-52
ColeSingleton13533	217	XP_004150336	PREDICTED: HAUS augmin-like complex subunit 3-like [Cucumis sativus]	59.3	5e-17
ColeSingleton13536	423	EOY18552	Mitochondrial substrate carrier family protein isoform 3 [Theobroma cacao]	107	2e-25
ColeSingleton13537	453	XP_002274205	PREDICTED: thioredoxin H-type 2 [Vitis vinifera] thioredoxin h1 [Vitis vinifera]	125	5e-27
ColeSingleton13538	188	XP_004243408	PREDICTED: adaptin ear-binding coat-associated protein 1-like [Solanum lycopersicum]	71.6	8e-11
ColeSingleton13542	463	XP_002277931	PREDICTED: homeobox protein knotted-1-like 1 [Vitis vinifera] hypothetical protein VITISV_015614 [Vitis vinifera] unnamed protein product [Vitis vinifera]	232	3e-59
ColeSingleton13543	424	XP_002516192	Pectinesterase PPE8B precursor, putative [Ricinus communis] Pectinesterase PPE8B precursor, putative [Ricinus communis]	129	3e-28
ColeSingleton1156	483	EOX98517	Ethylene-dependent gravitropism-deficient and yellow-green-like 3 [Theobroma cacao]	202	5e-76
ColeSingleton1158	481	XP_003529607	PREDICTED: kinesin-like protein KIF2A-like [Glycine max]	202	2e-60
ColeSingleton1161	470	XP_002302453	cytochrome P450 allene oxide synthase [Populus trichocarpa] cytochrome P450 allene oxide synthase [Populus trichocarpa]	135	3e-42
ColeSingleton1162	408	XP_004308068	PREDICTED: SKP1-like protein 21-like [Fragaria vesca subsp. vesca]	121	7e-26
ColeSingleton1163	539	XP_004235729	PREDICTED: early nodulin-like protein 1-like [Solanum lycopersicum]	87.4	2e-29
ColeSingleton1166	523	XP_002523362	conserved hypothetical protein [Ricinus communis] conserved hypothetical protein [Ricinus communis]	68.6	7e-10
ColeSingleton1167	252	XP_002265215	PREDICTED: F-box/LRR-repeat protein 3 [Vitis vinifera] unnamed protein product [Vitis vinifera]	87	2e-15
ColeSingleton1168	152	CAN68990	hypothetical protein VITISV_015170 [Vitis vinifera]	76.6	3e-12
ColeSingleton1174	482	XP_002512940	Splicing factor U2AF-associated protein, putative [Ricinus communis] Splicing factor U2AF-associated protein, putative [Ricinus communis]	149	1e-37
ColeSingleton1175	413	CAN70199	hypothetical protein VITISV_021220 [Vitis vinifera]	132	4e-37
ColeSingleton1178	479	EOX96191	SEC7-like guanine nucleotide exchange family protein [Theobroma cacao]	209	8e-67
ColeSingleton1179	261	CBL94163	putative RNA-directed DNA polymerase (Reverse transcriptase) [Malus domestica]	74.3	1e-11
ColeSingleton1180	334	XP_002526852	conserved hypothetical protein [Ricinus communis] conserved hypothetical protein [Ricinus communis]	80.9	1e-13
ColeSingleton1181	446	XP_002276424	PREDICTED: uncharacterized protein LOC100251030 [Vitis vinifera]	233	1e-59
ColeSingleton1186	414	XP_004237836	PREDICTED: choline/ethanolamine kinase-like isoform 1 [Solanum lycopersicum] PREDICTED: choline/ethanolamine kinase-like isoform 2 [Solanum lycopersicum]	85.9	4e-15
ColeSingleton1187	402	CAN77107	hypothetical protein VITISV_042167 [Vitis vinifera]	95.1	7e-18
ColeSingleton1192	263	XP_004242029	PREDICTED: chlorophyllide a oxygenase, chloroplastic-like [Solanum lycopersicum]	92.4	5e-17
ColeSingleton1193	468	CBI32619	unnamed protein product [Vitis vinifera]	155	6e-36
ColeSingleton1197	301	XP_002322105	amidase family protein [Populus trichocarpa] amidase family protein [Populus trichocarpa]	55.5	6e-06
ColeSingleton1198	473	XP_004230534	PREDICTED: LMBR1 domain-containing protein 2 homolog A-like [Solanum lycopersicum]	137	2e-39
ColeSingleton1199	254	XP_004302173	PREDICTED: protein TIC 20-II, chloroplastic-like [Fragaria vesca subsp. vesca]	81.6	8e-14
ColeSingleton1200	466	EMJ11426	hypothetical protein PRUPE_ppa015648mg [Prunus persica]	130	1e-28
ColeSingleton1201	450	XP_004166677	PREDICTED: uncharacterized protein LOC101225326, partial [Cucumis sativus]	204	6e-51
ColeSingleton1204	402	EOY22936	Gag-pro-like protein [Theobroma cacao]	73.6	2e-11
ColeSingleton1205	431	XP_002265452	PREDICTED: vacuolar iron transporter homolog 4-like [Vitis vinifera]	123	2e-26
ColeSingleton1207	456	XP_002334116	predicted protein [Populus trichocarpa] predicted protein [Populus trichocarpa]	102	4e-20
ColeSingleton1208	398	XP_002271978	PREDICTED: uncharacterized protein LOC100259633 [Vitis vinifera]	101	7e-20
ColeSingleton1213	388	XP_004301910	PREDICTED: uncharacterized protein LOC101295532 [Fragaria vesca subsp. vesca]	71.6	8e-11
ColeSingleton1215	520	XP_003638432	Craniofacial development protein [Medicago truncatula] Craniofacial development protein [Medicago truncatula]	56.2	3e-09
ColeSingleton1220	250	XP_002271991	PREDICTED: glucan endo-1,3-beta-glucosidase 2-like [Vitis vinifera]	134	1e-29
ColeSingleton1231	469	AEW24434	dehydrin 1 [Camellia sinensis]	80.1	2e-13
ColeSingleton1232	373	XP_003530423	PREDICTED: chaperone protein ClpB3, chloroplastic-like [Glycine max]	193	1e-47
ColeSingleton1233	462	XP_002309647	predicted protein [Populus trichocarpa] predicted protein [Populus trichocarpa]	157	9e-37
ColeSingleton1234	355	EOY30691	Alpha/beta-Hydrolases superfamily protein [Theobroma cacao]	119	3e-25
ColeSingleton1240	446	XP_002516797	Speckle-type POZ protein, putative [Ricinus communis] Speckle-type POZ protein, putative [Ricinus communis]	191	9e-47
ColeSingleton1243	149	XP_004148369	PREDICTED: 3-isopropylmalate dehydratase-like [Cucumis sativus] PREDICTED: 3-isopropylmalate dehydratase-like [Cucumis sativus]	72	8e-14
ColeSingleton1244	459	EOY10101	Sas10/U3 ribonucleoprotein family protein, putative isoform 2 [Theobroma cacao]	99.8	6e-36
ColeSingleton1246	445	XP_002284107	PREDICTED: DNA-directed RNA polymerases I, II, and III subunit RPABC1 isoform 1 [Vitis vinifera] PREDICTED: DNA-directed RNA polymerases I, II, and III subunit RPABC1 isoform 2 [Vitis vinifera]	151	8e-35
ColeSingleton1251	393	XP_002315154	predicted protein [Populus trichocarpa] predicted protein [Populus trichocarpa]	119	5e-42
ColeSingleton1255	293	BAA11674	unnamed protein product [Nicotiana tabacum]	137	1e-30
ColeSingleton1256	362	XP_004245265	PREDICTED: uncharacterized protein LOC101259775 [Solanum lycopersicum]	110	2e-22
ColeSingleton13546	479	EOY02321	Nodulin MtN21 /EamA-like transporter family protein isoform 1 [Theobroma cacao]	142	2e-55
ColeSingleton13548	285	EMJ09132	hypothetical protein PRUPE_ppa017704mg [Prunus persica]	174	9e-42
ColeSingleton13551	311	XP_002267856	PREDICTED: paired amphipathic helix protein Sin3-like 4-like [Vitis vinifera]	130	2e-28
ColeSingleton13552	407	XP_002281617	PREDICTED: receptor-like protein kinase HERK 1-like [Vitis vinifera]	157	5e-49
ColeSingleton13554	343	XP_002527110	f-actin capping protein beta subunit, putative [Ricinus communis] f-actin capping protein beta subunit, putative [Ricinus communis]	124	8e-27
ColeSingleton13557	475	CBI37546	unnamed protein product [Vitis vinifera]	95.5	3e-33
ColeSingleton13561	334	XP_003555086	PREDICTED: histone-lysine N-methyltransferase ATX4-like [Glycine max]	211	9e-53
ColeSingleton13562	480	EMJ23973	hypothetical protein PRUPE_ppa006563mg [Prunus persica]	196	1e-64
ColeSingleton13563	361	XP_002277979	PREDICTED: translation initiation factor IF-3-like [Vitis vinifera]	56.6	3e-06
ColeSingleton13571	485	XP_002278584	PREDICTED: agamous-like MADS-box protein AGL15-like [Vitis vinifera]	128	6e-28
ColeSingleton13575	492	XP_002331442	methyl binding domain protein [Populus trichocarpa] methyl binding domain protein [Populus trichocarpa]	65.9	5e-09
ColeSingleton13585	309	XP_002284521	PREDICTED: uncharacterized protein LOC100241642 [Vitis vinifera]	176	2e-42
ColeSingleton13586	459	XP_002844966	hypothetical protein MCYG_06930 [Arthroderma otae CBS 113480] hypothetical protein MCYG_06930 [Arthroderma otae CBS 113480]	60.8	1e-07
ColeSingleton13589	447	CAN72491	hypothetical protein VITISV_003144 [Vitis vinifera]	54.7	2e-11
ColeSingleton13590	348	XP_003633895	PREDICTED: ATPase 7, plasma membrane-type isoform 2 [Vitis vinifera]	47.8	2e-14
ColeSingleton13591	325	CBI19029	unnamed protein product [Vitis vinifera]	146	2e-33
ColeSingleton13593	506	EMJ04835	hypothetical protein PRUPE_ppa004100mg [Prunus persica]	79.3	2e-13
ColeSingleton13595	282	XP_002299532	predicted protein [Populus trichocarpa] predicted protein [Populus trichocarpa]	101	7e-20
ColeSingleton13599	407	CAN75759	hypothetical protein VITISV_017339 [Vitis vinifera]	71.6	8e-25
ColeSingleton13605	461	CBI17455	unnamed protein product [Vitis vinifera]	213	2e-53
ColeSingleton13608	417	CBI15622	unnamed protein product [Vitis vinifera]	162	4e-45
ColeSingleton13609	227	AFK33567	unknown [Lotus japonicus]	83.6	2e-14
ColeSingleton13614	514	XP_004232241	PREDICTED: FACT complex subunit SSRP1-like [Solanum lycopersicum]	321	6e-86
ColeSingleton13616	239	EMJ10209	hypothetical protein PRUPE_ppa023358mg [Prunus persica]	66.6	3e-09
ColeSingleton13617	230	CBI32868	unnamed protein product [Vitis vinifera]	141	8e-32
ColeSingleton13622	316	XP_002273909	PREDICTED: U-box domain-containing protein 4 [Vitis vinifera] hypothetical protein VITISV_002189 [Vitis vinifera]	165	6e-39
ColeSingleton13624	258	AAP42504	anionic peroxidase swpa5 [Ipomoea batatas]	125	6e-27
ColeSingleton13633	406	XP_002278549	PREDICTED: probable cadmium/zinc-transporting ATPase HMA1, chloroplastic [Vitis vinifera] unnamed protein product [Vitis vinifera]	88.6	6e-16
ColeSingleton13639	493	XP_002318847	AP2/ERF domain-containing transcription factor [Populus trichocarpa] AP2/ERF domain-containing transcription factor [Populus trichocarpa]	100	2e-19
ColeSingleton13641	185	XP_004988279	hypothetical protein PTSG_13115 [Salpingoeca sp. ATCC 50818] hypothetical protein PTSG_13115 [Salpingoeca sp. ATCC 50818]	58.9	6e-07
ColeSingleton13644	244	XP_002263911	PREDICTED: uridine kinase-like protein 4 [Vitis vinifera] unnamed protein product [Vitis vinifera]	124	1e-26
ColeSingleton13647	493	CBI19046	unnamed protein product [Vitis vinifera]	298	5e-79
ColeSingleton13650	321	NP_001242133	uncharacterized protein LOC100795457 [Glycine max] unknown [Glycine max]	75.9	4e-12
ColeSingleton13651	342	XP_002277442	PREDICTED: uncharacterized protein LOC100257995 [Vitis vinifera] unnamed protein product [Vitis vinifera]	42.4	6e-07
ColeSingleton13653	139	XP_004157128	PREDICTED: DNA-directed RNA polymerase D subunit 2a-like [Cucumis sativus]	57	2e-06
ColeSingleton13654	480	XP_004232837	PREDICTED: splicing factor 3B subunit 2-like [Solanum lycopersicum]	100	6e-29
ColeSingleton13657	517	EOY33582	Cellulose synthase-like A02 isoform 3 [Theobroma cacao]	66.2	3e-09
ColeSingleton13658	362	CAN78294	hypothetical protein VITISV_035517 [Vitis vinifera]	56.2	8e-08
ColeSingleton13659	508	XP_003631541	PREDICTED: uncharacterized protein LOC100246973 [Vitis vinifera]	147	2e-33
ColeSingleton13660	460	EMJ23021	hypothetical protein PRUPE_ppa002962mg [Prunus persica]	182	4e-44
ColeSingleton13661	204	XP_004236315	PREDICTED: callose synthase 10-like [Solanum lycopersicum]	102	4e-20
ColeSingleton13664	384	XP_002534079	conserved hypothetical protein [Ricinus communis] conserved hypothetical protein [Ricinus communis]	62	3e-14
ColeSingleton13666	487	XP_002314917	predicted protein [Populus trichocarpa] predicted protein [Populus trichocarpa]	205	5e-51
ColeSingleton13667	505	XP_004232923	PREDICTED: receptor-like protein kinase HSL1-like [Solanum lycopersicum]	83.6	7e-26
ColeSingleton13670	487	CAN75729	hypothetical protein VITISV_031409 [Vitis vinifera]	148	1e-56
ColeSingleton13671	420	EOY04657	Plant stearoyl-acyl-carrier-protein desaturase family protein [Theobroma cacao]	160	1e-37
ColeSingleton13677	365	XP_002532967	nutrient reservoir, putative [Ricinus communis] nutrient reservoir, putative [Ricinus communis]	59.7	3e-07
ColeSingleton13679	424	XP_003632740	PREDICTED: uncharacterized protein LOC100243497 [Vitis vinifera]	70.5	2e-10
ColeSingleton13680	394	XP_002279009	PREDICTED: uncharacterized protein LOC100266864 [Vitis vinifera]	85.1	8e-26
ColeSingleton13689	282	ACQ41892	3-ketoacyl-CoA synthase [Camellia oleifera]	129	3e-28
ColeSingleton13690	238	XP_002314991	predicted protein [Populus trichocarpa] predicted protein [Populus trichocarpa]	102	1e-25
ColeSingleton13691	506	XP_003631651	PREDICTED: uncharacterized protein At1g01500-like [Vitis vinifera]	135	5e-49
ColeSingleton13695	398	XP_002319023	predicted protein [Populus trichocarpa] predicted protein [Populus trichocarpa]	60.8	5e-11
ColeSingleton13704	458	XP_004241482	PREDICTED: alcohol dehydrogenase-like 6-like [Solanum lycopersicum]	283	1e-74
ColeSingleton13708	326	XP_002516625	conserved hypothetical protein [Ricinus communis] conserved hypothetical protein [Ricinus communis]	99.4	4e-19
ColeSingleton13709	190	CAN78803	hypothetical protein VITISV_032700 [Vitis vinifera]	63.9	2e-08
ColeSingleton13710	406	XP_003632272	PREDICTED: shugoshin-1-like [Vitis vinifera]	125	6e-27
ColeSingleton13712	433	CBI30234	unnamed protein product [Vitis vinifera]	176	3e-42
ColeSingleton13714	499	D7T737	RecName: Full=1,2-dihydroxy-3-keto-5-methylthiopentene dioxygenase 1; AltName: Full=Acireductone dioxygenase (Fe(2+)-requiring) 1; Short=ARD 1; Short=Fe-ARD 1 unnamed protein product [Vitis vinifera]	129	5e-59
ColeSingleton13716	465	XP_004236524	PREDICTED: nitrate transporter 1.2-like [Solanum lycopersicum]	167	1e-39
ColeSingleton13717	292	XP_002535249	conserved hypothetical protein [Ricinus communis] conserved hypothetical protein [Ricinus communis]	106	2e-21
ColeSingleton13719	271	EOX97290	NAD(P)-linked oxidoreductase superfamily protein [Theobroma cacao]	94.7	3e-32
ColeSingleton13721	355	EOX96474	GRAM domain family protein, putative isoform 2 [Theobroma cacao]	143	2e-32
ColeSingleton13722	404	XP_004291149	PREDICTED: uncharacterized protein LOC101292862 [Fragaria vesca subsp. vesca]	69.3	4e-10
ColeSingleton13726	238	CAN80129	hypothetical protein VITISV_018340 [Vitis vinifera]	62	6e-08
ColeSingleton13727	308	XP_002277673	PREDICTED: homeobox-leucine zipper protein ROC3 [Vitis vinifera] hypothetical protein VITISV_032685 [Vitis vinifera] unnamed protein product [Vitis vinifera]	138	5e-31
ColeSingleton13728	317	CBI19757	unnamed protein product [Vitis vinifera]	95.9	4e-18
ColeSingleton13730	410	EGA84242	hypothetical protein VL3_5180 [Saccharomyces cerevisiae VL3]	65.5	6e-09
ColeSingleton13731	388	AEI83426	transcription factor R2R3-MYB2 [Camellia sinensis]	220	3e-65
ColeSingleton13734	384	NP_001052299	Os04g0243400 [Oryza sativa Japonica Group] OSJNBb0043H09.1 [Oryza sativa Japonica Group] Os04g0243400 [Oryza sativa Japonica Group] hypothetical protein OsJ_14020 [Oryza sativa Japonica Group] unnamed protein product [Oryza sativa Japonica Group] unnamed protein product [Oryza sativa Japonica Group]	65.9	4e-09
ColeSingleton13736	412	XP_002302154	predicted protein [Populus trichocarpa] predicted protein [Populus trichocarpa]	51.6	4e-13
ColeSingleton13742	262	EMJ18170	hypothetical protein PRUPE_ppa003100mg [Prunus persica]	153	2e-35
ColeSingleton13744	488	ELR09247	hypothetical protein GMDG_03817 [Geomyces destructans 20631-21]	168	6e-40
ColeSingleton13747	396	EOY05133	Ralf-like 32 [Theobroma cacao]	111	7e-23
ColeSingleton13750	451	XP_002876454	seven in absentia family protein [Arabidopsis lyrata subsp. lyrata] seven in absentia family protein [Arabidopsis lyrata subsp. lyrata]	76.6	3e-12
ColeSingleton13751	370	NP_001056754	Os06g0140800 [Oryza sativa Japonica Group] Os06g0140800 [Oryza sativa Japonica Group] unnamed protein product [Oryza sativa Japonica Group] hypothetical protein OsI_21572 [Oryza sativa Indica Group] hypothetical protein OsJ_20070 [Oryza sativa Japonica Group]	73.2	1e-24
ColeSingleton13752	213	XP_004251434	PREDICTED: uncharacterized protein LOC101260697 [Solanum lycopersicum]	80.5	2e-13
ColeSingleton13753	193	XP_003554829	PREDICTED: LOW QUALITY PROTEIN: serine/threonine-protein kinase HT1-like [Glycine max]	95.9	4e-18
ColeSingleton13755	506	CBI34399	unnamed protein product [Vitis vinifera]	50.8	7e-08
ColeSingleton13756	493	XP_002264500	PREDICTED: methyl-CpG-binding domain-containing protein 9-like [Vitis vinifera]	150	2e-37
ColeSingleton13758	453	XP_002514912	Alkylated DNA repair protein alkB, putative [Ricinus communis] Alkylated DNA repair protein alkB, putative [Ricinus communis]	165	3e-51
ColeSingleton13760	159	EOY03576	U-box domain-containing protein isoform 1 [Theobroma cacao] U-box domain-containing protein isoform 1 [Theobroma cacao]	80.5	2e-13
ColeSingleton13763	453	XP_002270509	PREDICTED: cohesin subunit SA-1-like [Vitis vinifera]	138	5e-31
ColeSingleton13766	421	EMJ23247	hypothetical protein PRUPE_ppa003089mg [Prunus persica]	222	4e-56
ColeSingleton13767	503	XP_002271515	PREDICTED: probable lysine-specific demethylase JMJ14-like [Vitis vinifera]	164	5e-42
ColeSingleton13770	372	CAN78598	hypothetical protein VITISV_001332 [Vitis vinifera]	80.9	5e-23
ColeSingleton13776	233	NP_001030614	phosphoglycerate mutase-like protein [Arabidopsis thaliana] phosphoglycerate mutase-like protein [Arabidopsis thaliana]	61.2	1e-07
ColeSingleton13777	262	XP_003547420	PREDICTED: uncharacterized protein LOC100806034 [Glycine max]	72.4	2e-15
ColeSingleton13778	254	CAN61487	hypothetical protein VITISV_038128 [Vitis vinifera]	75.9	2e-16
ColeSingleton13781	496	XP_003633305	PREDICTED: uncharacterized protein LOC100249944 [Vitis vinifera]	94	2e-17
ColeSingleton13782	309	XP_004251335	PREDICTED: uncharacterized protein LOC101247785 [Solanum lycopersicum]	189	2e-46
ColeSingleton13788	362	XP_004154856	PREDICTED: GTPase HflX-like [Cucumis sativus]	66.2	3e-09
ColeSingleton13789	367	EOY07537	Actin 3 [Theobroma cacao]	213	2e-57
ColeSingleton13796	372	EMJ23250	hypothetical protein PRUPE_ppa003115mg [Prunus persica]	85.9	1e-15
ColeSingleton13801	440	XP_002284741	PREDICTED: proteasome assembly chaperone 2 [Vitis vinifera] unnamed protein product [Vitis vinifera]	114	1e-23
ColeSingleton13803	427	XP_002273616	PREDICTED: uncharacterized protein LOC100267388 [Vitis vinifera]	112	2e-29
ColeSingleton13807	472	EOY21837	Alpha/beta-Hydrolases superfamily protein [Theobroma cacao]	92.4	4e-17
ColeSingleton13809	153	XP_004240153	PREDICTED: laccase-7-like [Solanum lycopersicum]	57.8	1e-06
ColeSingleton13810	194	XP_004246241	PREDICTED: 60S ribosomal protein L5-like [Solanum lycopersicum]	75.5	6e-12
ColeSingleton13812	332	XP_003607607	Trehalose synthase-like protein [Medicago truncatula] Trehalose synthase-like protein [Medicago truncatula]	67.8	6e-13
ColeSingleton13814	195	XP_004299919	PREDICTED: UDP-glucose:glycoprotein glucosyltransferase-like [Fragaria vesca subsp. vesca]	103	1e-20
ColeSingleton13815	487	XP_004234137	PREDICTED: uncharacterized protein C167.05-like [Solanum lycopersicum]	197	1e-48
ColeSingleton13819	502	XP_004229696	PREDICTED: protein ECERIFERUM 1-like [Solanum lycopersicum]	267	1e-69
ColeSingleton13822	395	XP_002308824	predicted protein [Populus trichocarpa] predicted protein [Populus trichocarpa]	105	4e-21
ColeSingleton13827	502	XP_004238262	PREDICTED: sugar transporter ERD6-like 6-like [Solanum lycopersicum]	101	7e-20
ColeSingleton13828	518	XP_002262710	PREDICTED: uncharacterized protein LOC100266659 [Vitis vinifera]	191	7e-47
ColeSingleton13829	483	CBI34715	unnamed protein product [Vitis vinifera]	111	7e-23
ColeSingleton13837	392	BAE48793	sulfite oxidase [Codonopsis lanceolata]	164	1e-38
ColeSingleton13842	457	EOY20741	Myb119, putative [Theobroma cacao]	113	2e-23
ColeSingleton13843	500	XP_002264669	PREDICTED: WD repeat-containing protein WRAP73 [Vitis vinifera]	200	9e-80
ColeSingleton13845	366	XP_004232583	PREDICTED: uncharacterized transporter YBR287W-like [Solanum lycopersicum]	132	1e-33
ColeSingleton13851	445	XP_002275939	PREDICTED: uncharacterized protein LOC100244989 [Vitis vinifera]	158	5e-37
ColeSingleton13858	469	XP_002515470	calcium ion binding protein, putative [Ricinus communis] calcium ion binding protein, putative [Ricinus communis]	152	5e-35
ColeSingleton13860	326	CAN73102	hypothetical protein VITISV_042891 [Vitis vinifera]	51.6	3e-09
ColeSingleton13862	493	XP_002269681	PREDICTED: transcription factor GTE9-like [Vitis vinifera]	151	1e-36
ColeSingleton13865	490	EMJ17704	hypothetical protein PRUPE_ppa024124mg [Prunus persica]	110	1e-49
ColeSingleton13866	313	XP_002279855	PREDICTED: uncharacterized protein LOC100251731 [Vitis vinifera]	83.6	2e-14
ColeSingleton13869	397	XP_002535305	conserved hypothetical protein [Ricinus communis] conserved hypothetical protein [Ricinus communis]	151	6e-35
ColeSingleton13875	457	XP_002264957	PREDICTED: aquaporin NIP1-2 [Vitis vinifera] unnamed protein product [Vitis vinifera]	213	1e-53
ColeSingleton13876	491	CBI27420	unnamed protein product [Vitis vinifera]	105	7e-21
ColeSingleton13886	408	XP_002265730	PREDICTED: nuclear-pore anchor-like [Vitis vinifera]	187	8e-46
ColeSingleton13887	383	EMJ27119	hypothetical protein PRUPE_ppa012022mg [Prunus persica]	65.5	6e-09
ColeSingleton13901	275	EMJ20116	hypothetical protein PRUPE_ppa001456mg [Prunus persica]	151	8e-35
ColeSingleton13911	328	XP_004304699	PREDICTED: uncharacterized protein LOC101294782 [Fragaria vesca subsp. vesca]	58.2	2e-17
ColeSingleton13913	366	XP_002327790	predicted protein [Populus trichocarpa] predicted protein [Populus trichocarpa]	103	1e-20
ColeSingleton13915	376	XP_002277887	PREDICTED: homoserine kinase-like [Vitis vinifera]	59.3	3e-17
ColeSingleton13917	435	EOY12678	Uncharacterized protein TCM_031181 [Theobroma cacao]	89.7	3e-16
ColeSingleton13919	410	CAN65237	hypothetical protein VITISV_018674 [Vitis vinifera]	63.9	2e-08
ColeSingleton13922	512	EOY28393	Uncharacterized protein TCM_029972 [Theobroma cacao]	229	3e-58
ColeSingleton13923	423	XP_002299651	predicted protein [Populus trichocarpa] predicted protein [Populus trichocarpa]	106	6e-23
ColeSingleton13924	308	XP_004288155	PREDICTED: magnesium-transporting ATPase, P-type 1-like [Fragaria vesca subsp. vesca]	119	3e-25
ColeSingleton13926	231	XP_002511976	X-linked inhibitor of apoptosis protein, xiap, putative [Ricinus communis] X-linked inhibitor of apoptosis protein, xiap, putative [Ricinus communis]	107	1e-21
ColeSingleton13928	330	XP_002265256	PREDICTED: nucleolar GTP-binding protein 1-like [Vitis vinifera]	81.3	1e-13
ColeSingleton13932	176	XP_004487054	PREDICTED: 125 kDa kinesin-related protein-like isoform X2 [Cicer arietinum]	83.2	3e-14
ColeSingleton13933	358	XP_004244170	PREDICTED: uncharacterized protein LOC101263228 [Solanum lycopersicum]	58.2	9e-07
ColeSingleton13937	303	CBI17459	unnamed protein product [Vitis vinifera]	57	2e-06
ColeSingleton13938	324	XP_003549923	PREDICTED: uncharacterized protein LOC100527157 [Glycine max]	76.6	3e-12
ColeSingleton13943	443	XP_002269838	PREDICTED: uncharacterized protein LOC100257731 [Vitis vinifera]	171	1e-46
ColeSingleton13944	425	XP_002276690	PREDICTED: uncharacterized protein LOC100248664 [Vitis vinifera]	117	3e-35
ColeSingleton13945	410	XP_002305839	predicted protein [Populus trichocarpa] predicted protein [Populus trichocarpa]	60.5	2e-07
ColeSingleton13948	460	XP_004138894	PREDICTED: protein pelota-like [Cucumis sativus] PREDICTED: protein pelota-like [Cucumis sativus]	268	3e-70
ColeSingleton13950	331	XP_004252162	PREDICTED: type I inositol 1,4,5-trisphosphate 5-phosphatase 12-like [Solanum lycopersicum]	168	6e-40
ColeSingleton13951	177	XP_002530151	carboxy-lyase, putative [Ricinus communis] carboxy-lyase, putative [Ricinus communis]	79	5e-13
ColeSingleton13952	460	XP_002268727	PREDICTED: uncharacterized protein LOC100265450 [Vitis vinifera]	79.3	4e-13
ColeSingleton13956	510	XP_002433468	transcription initiation factor TFII-D subunit, putative [Ixodes scapularis] transcription initiation factor TFII-D subunit, putative [Ixodes scapularis]	152	2e-35
ColeSingleton13960	538	XP_002264457	PREDICTED: uncharacterized protein LOC100263874 [Vitis vinifera]	112	5e-23
ColeSingleton13966	424	XP_002325199	predicted protein [Populus trichocarpa] predicted protein [Populus trichocarpa]	106	1e-36
ColeSingleton13969	496	EMJ26641	hypothetical protein PRUPE_ppa000410mg [Prunus persica]	202	2e-53
ColeSingleton13972	395	CCA66222	hypothetical protein [Beta vulgaris subsp. vulgaris]	84.7	9e-15
ColeSingleton13975	451	P18025	RecName: Full=Tubulin beta-1 chain; AltName: Full=Beta-1-tubulin beta 1 tubulin [Zea mays]	232	6e-74
ColeSingleton13982	432	CBI37096	unnamed protein product [Vitis vinifera]	202	4e-50
ColeSingleton13987	336	NP_001236999	clathrin heavy chain [Glycine max] clathrin heavy chain [Glycine max]	139	2e-31
ColeSingleton13988	192	XP_004243828	PREDICTED: LOW QUALITY PROTEIN: probable histone-lysine N-methyltransferase ATXR3-like [Solanum lycopersicum]	75.5	6e-12
ColeSingleton13996	402	EMJ23142	hypothetical protein PRUPE_ppa001591mg [Prunus persica]	102	1e-38
ColeSingleton13997	225	CBL94163	putative RNA-directed DNA polymerase (Reverse transcriptase) [Malus domestica]	82	6e-14
ColeSingleton14001	200	XP_002263964	PREDICTED: aspartic proteinase nepenthesin-1 [Vitis vinifera] hypothetical protein VITISV_009613 [Vitis vinifera]	109	3e-22
ColeSingleton14003	271	XP_004244370	PREDICTED: uncharacterized protein LOC101247940 [Solanum lycopersicum]	67.8	1e-09
ColeSingleton14006	473	EMJ23970	hypothetical protein PRUPE_ppa006557mg [Prunus persica]	95.5	5e-18
ColeSingleton14009	510	EMJ11718	hypothetical protein PRUPE_ppa007705mg [Prunus persica]	96.7	2e-18
ColeSingleton14010	227	EOY07248	RNA polymerase II C-terminal domain phosphatase-like 2 isoform 5, partial [Theobroma cacao]	130	1e-28
ColeSingleton14012	379	XP_003633415	PREDICTED: uncharacterized protein At5g08430-like [Vitis vinifera]	117	1e-24
ColeSingleton14014	332	CAN65986	hypothetical protein VITISV_042143 [Vitis vinifera]	62	6e-08
ColeSingleton14017	309	EMJ12110	hypothetical protein PRUPE_ppa000602mg [Prunus persica]	48.5	5e-07
ColeSingleton14018	510	XP_002312677	predicted protein [Populus trichocarpa] predicted protein [Populus trichocarpa]	68.2	1e-11
ColeSingleton14020	289	XP_001831710	hypothetical protein CC1G_12230 [Coprinopsis cinerea okayama7#130] hypothetical protein CC1G_12230 [Coprinopsis cinerea okayama7#130]	58.2	1e-06
ColeSingleton14023	156	XP_003588352	NADH dehydrogenase subunit [Medicago truncatula] NADH dehydrogenase subunit [Medicago truncatula]	64.7	1e-08
ColeSingleton14025	498	XP_002282672	PREDICTED: pollen-specific protein SF21 [Vitis vinifera] unnamed protein product [Vitis vinifera]	115	5e-24
ColeSingleton14028	303	XP_002281151	PREDICTED: long chain acyl-CoA synthetase 2 [Vitis vinifera] unnamed protein product [Vitis vinifera]	89.4	4e-19
ColeSingleton14033	130	EPS72755	hypothetical protein M569_02000, partial [Genlisea aurea]	94.7	9e-18
ColeSingleton14034	482	EOX94567	Magnesium transporter MRS2-2 isoform 1 [Theobroma cacao]	88.6	6e-16
ColeSingleton14036	478	XP_002266748	PREDICTED: splicing factor 3A subunit 2 [Vitis vinifera]	297	9e-79
ColeSingleton14039	514	XP_004247536	PREDICTED: mismatch repair endonuclease pms1-like [Solanum lycopersicum]	79.3	4e-13
ColeSingleton14040	481	XP_002271263	PREDICTED: uncharacterized protein LOC100254952 [Vitis vinifera]	230	2e-78
ColeSingleton14041	348	BAJ33927	unnamed protein product [Thellungiella halophila]	137	9e-31
ColeSingleton14042	211	EMJ13161	hypothetical protein PRUPE_ppa006542mg [Prunus persica]	59.3	4e-07
ColeSingleton14044	210	XP_002523105	sec15, putative [Ricinus communis] sec15, putative [Ricinus communis]	42.7	6e-07
ColeSingleton14048	467	EPS58253	hypothetical protein M569_16562 [Genlisea aurea]	177	1e-42
ColeSingleton14050	261	EMJ08417	hypothetical protein PRUPE_ppa001389mg [Prunus persica]	134	1e-29
ColeSingleton14057	215	AAS67334	hin1-like protein [Solanum tuberosum]	117	2e-24
ColeSingleton14062	353	XP_004515656	PREDICTED: uncharacterized protein LOC101513911 [Cicer arietinum]	97.4	1e-18
ColeSingleton14066	501	XP_002274643	PREDICTED: methyl-CpG-binding domain-containing protein 9-like [Vitis vinifera]	148	7e-34
ColeSingleton14067	501	EHY57469	hypothetical protein HMPREF1120_05503 [Exophiala dermatitidis NIH/UT8656]	99.4	3e-26
ColeSingleton14071	288	XP_004230100	PREDICTED: perakine reductase-like [Solanum lycopersicum]	117	3e-28
ColeSingleton14072	373	XP_003519763	PREDICTED: UDP-glucuronic acid decarboxylase 1-like [Glycine max]	105	5e-21
ColeSingleton14073	385	EMJ22797	hypothetical protein PRUPE_ppa026809mg [Prunus persica]	97.1	2e-18
ColeSingleton14075	461	EMJ14905	hypothetical protein PRUPE_ppa000701mg [Prunus persica]	256	2e-66
ColeSingleton14078	199	XP_002514004	pyridoxamine 5-phosphate oxidase, putative [Ricinus communis] pyridoxamine 5-phosphate oxidase, putative [Ricinus communis]	90.5	1e-22
ColeSingleton14080	363	EOY27139	Acid phosphatase [Theobroma cacao]	57.8	1e-06
ColeSingleton14081	436	EPS66086	hypothetical protein M569_08690, partial [Genlisea aurea]	177	9e-56
ColeSingleton14089	423	EOY17859	Syntaxin of plants 31 isoform 1 [Theobroma cacao]	56.6	1e-11
ColeSingleton14091	383	XP_004247568	PREDICTED: uncharacterized protein LOC101246180 [Solanum lycopersicum]	102	4e-20
ColeSingleton14092	483	BAK52397	leucine rich repeat receptor protein kinase 2 [Solanum pennellii]	207	4e-54
ColeSingleton14093	365	EOX98827	Annexin-like protein [Theobroma cacao]	81.3	1e-13
ColeSingleton14098	416	CCI55315	PH01B001I13.11 [Phyllostachys edulis]	113	2e-23
ColeSingleton14099	507	CBI18550	unnamed protein product [Vitis vinifera]	98.2	8e-19
ColeSingleton14100	352	XP_002268907	PREDICTED: katanin p80 WD40 repeat-containing subunit B1 homolog 1-like [Vitis vinifera]	113	2e-23
ColeSingleton14101	393	XP_002285905	PREDICTED: uncharacterized protein LOC100243759 [Vitis vinifera] unnamed protein product [Vitis vinifera]	109	3e-22
ColeSingleton14102	347	EOY23117	IQ-domain 24, putative [Theobroma cacao]	117	1e-24
ColeSingleton14104	430	EMJ11628	hypothetical protein PRUPE_ppa000340mg [Prunus persica]	243	1e-62
ColeSingleton14107	482	EMJ08043	hypothetical protein PRUPE_ppa027064mg [Prunus persica]	138	5e-31
ColeSingleton14110	507	XP_002509715	ara4-interacting protein, putative [Ricinus communis] ara4-interacting protein, putative [Ricinus communis]	160	1e-37
ColeSingleton14114	513	XP_004239670	PREDICTED: double-stranded RNA-binding protein 2-like [Solanum lycopersicum]	193	1e-47
ColeSingleton14115	451	EOY34059	XB3 in [Theobroma cacao]	60.8	1e-07
ColeSingleton14116	289	XP_002266955	PREDICTED: uncharacterized protein LOC100252094 [Vitis vinifera] unnamed protein product [Vitis vinifera]	153	2e-35
ColeSingleton14119	299	ACB28472	polyprotein [Ananas comosus]	74.7	1e-11
ColeSingleton14122	306	XP_004146659	PREDICTED: 5'-nucleotidase domain-containing protein DDB_G0275467-like [Cucumis sativus] PREDICTED: 5'-nucleotidase domain-containing protein DDB_G0275467-like [Cucumis sativus]	129	3e-28
ColeSingleton14124	532	XP_002307523	predicted protein [Populus trichocarpa] predicted protein [Populus trichocarpa]	201	2e-68
ColeSingleton14127	104	XP_004235162	PREDICTED: cell number regulator 6-like [Solanum lycopersicum]	62.8	4e-08
ColeSingleton14128	498	CBL94163	putative RNA-directed DNA polymerase (Reverse transcriptase) [Malus domestica]	82	5e-17
ColeSingleton14134	518	EOY13173	Sodium/calcium exchanger family protein / calcium-binding EF hand family protein isoform 1 [Theobroma cacao]	209	1e-55
ColeSingleton14138	468	XP_002281627	PREDICTED: transmembrane ascorbate ferrireductase 1 [Vitis vinifera] unnamed protein product [Vitis vinifera]	107	2e-21
ColeSingleton14139	329	CAN76606	hypothetical protein VITISV_012935 [Vitis vinifera]	102	3e-20
ColeSingleton14140	433	XP_002283428	PREDICTED: vacuolar protein sorting-associated protein 16 homolog [Vitis vinifera] unnamed protein product [Vitis vinifera]	182	4e-44
ColeSingleton14141	447	EOY13077	Serine/threonine-protein kinase 24 isoform 1 [Theobroma cacao] Serine/threonine-protein kinase 24 isoform 1 [Theobroma cacao]	91.7	8e-17
ColeSingleton14144	404	EOX97826	SAUR family protein [Theobroma cacao]	191	7e-47
ColeSingleton14148	231	XP_003617314	protease inhibitor [Medicago truncatula] protease inhibitor [Medicago truncatula]	99	5e-19
ColeSingleton14150	291	CAP58707	putative polyol transported protein 2 [Hevea brasiliensis]	157	1e-36
ColeSingleton14151	333	ABK95724	unknown [Populus trichocarpa]	142	3e-32
ColeSingleton14154	402	XP_002329355	predicted protein [Populus trichocarpa] predicted protein [Populus trichocarpa]	80.5	2e-13
ColeSingleton14156	284	XP_002267103	PREDICTED: spermatogenesis-associated protein 20-like [Vitis vinifera]	128	6e-28
ColeSingleton14162	438	XP_002284857	PREDICTED: choline transporter-like protein 2 [Vitis vinifera] unnamed protein product [Vitis vinifera]	243	2e-62
ColeSingleton14163	462	CAN66510	hypothetical protein VITISV_003620 [Vitis vinifera]	55.8	5e-06
ColeSingleton14168	365	EOX96349	GATA transcription factor 2, putative [Theobroma cacao]	138	7e-31
ColeSingleton14170	275	EPS70603	hypothetical protein M569_04157, partial [Genlisea aurea]	80.9	1e-13
ColeSingleton14175	484	CBI16623	unnamed protein product [Vitis vinifera]	92.8	3e-17
ColeSingleton14176	359	EMJ01050	hypothetical protein PRUPE_ppa006247mg [Prunus persica]	110	2e-22
ColeSingleton14178	478	XP_002283325	PREDICTED: protein SET [Vitis vinifera]	58.5	2e-08
ColeSingleton14180	452	NP_735966	cell wall surface anchor family protein [Streptococcus agalactiae NEM316] cell wall surface anchor protein [Streptococcus agalactiae] Unknown [Streptococcus agalactiae NEM316]	59.3	4e-07
ColeSingleton14181	193	EOA39821	hypothetical protein CARUB_v10008487mg, partial [Capsella rubella]	66.6	3e-09
ColeSingleton14184	165	AAK52566	Unknown protein [Oryza sativa Japonica Group]	50.8	1e-12
ColeSingleton14187	434	EPS72090	hypothetical protein M569_02668, partial [Genlisea aurea]	191	4e-67
ColeSingleton14190	156	ABX76300	heat shock protein 60 [Ageratina adenophora]	99.8	3e-19
ColeSingleton14191	481	XP_002515853	importin beta-1, putative [Ricinus communis] importin beta-1, putative [Ricinus communis]	109	5e-25
ColeSingleton14193	412	AFP49343	transducin family protein, partial [Olea europaea]	95.1	7e-18
ColeSingleton14194	450	XP_004299961	PREDICTED: imidazole glycerol phosphate synthase hisHF, chloroplastic-like [Fragaria vesca subsp. vesca]	77	2e-12
ColeSingleton14199	332	EMJ08816	hypothetical protein PRUPE_ppa019748mg, partial [Prunus persica]	62.4	5e-08
ColeSingleton14201	389	BAI40146	glutathione S-transferase 1 [Diospyros kaki]	90.1	2e-16
ColeSingleton14202	408	EMJ12117	hypothetical protein PRUPE_ppa000004mg [Prunus persica]	58.2	9e-07
ColeSingleton14204	258	CBI22196	unnamed protein product [Vitis vinifera]	138	6e-31
ColeSingleton14207	376	CBI16632	unnamed protein product [Vitis vinifera]	202	2e-50
ColeSingleton14208	356	CAN78577	hypothetical protein VITISV_020585 [Vitis vinifera]	66.2	2e-11
ColeSingleton14210	329	CBI19499	unnamed protein product [Vitis vinifera]	183	1e-44
ColeSingleton14211	441	CBI40062	unnamed protein product [Vitis vinifera]	140	1e-57
ColeSingleton14214	375	CBI40152	unnamed protein product [Vitis vinifera]	72.8	4e-11
ColeSingleton14216	221	EMD58210	hypothetical protein COCSADRAFT_104431, partial [Bipolaris sorokiniana ND90Pr]	101	1e-19
ColeSingleton14218	277	XP_002284216	PREDICTED: heat stress transcription factor B-3-like [Vitis vinifera]	68.2	9e-10
ColeSingleton14222	428	XP_002272651	PREDICTED: mitochondrial substrate carrier family protein B [Vitis vinifera] unnamed protein product [Vitis vinifera]	218	4e-55
ColeSingleton14223	133	XP_002282493	PREDICTED: uncharacterized protein LOC100261127 [Vitis vinifera]	77.4	1e-12
ColeSingleton14226	291	XP_004245486	PREDICTED: protein NLP7-like [Solanum lycopersicum]	98.6	2e-22
ColeSingleton14227	428	XP_002283370	PREDICTED: uncharacterized protein LOC100250468 [Vitis vinifera]	145	4e-36
ColeSingleton14229	378	XP_004310117	PREDICTED: pyruvate dehydrogenase E1 component subunit beta-1, mitochondrial-like [Fragaria vesca subsp. vesca]	134	1e-46
ColeSingleton14235	465	EOX91865	Zincin-like metalloproteases family protein [Theobroma cacao]	272	3e-71
ColeSingleton14240	197	XP_004287110	PREDICTED: uncharacterized protein LOC101307237 [Fragaria vesca subsp. vesca]	92	6e-17
ColeSingleton14253	466	EMG48597	hypothetical protein G210_0796, partial [Candida maltosa Xu316]	67.8	1e-09
ColeSingleton14255	388	EOY09194	UDP-glucosyltransferase, putative [Theobroma cacao]	139	4e-31
ColeSingleton14258	432	EMJ06502	hypothetical protein PRUPE_ppa006778mg [Prunus persica] hypothetical protein PRUPE_ppa006778mg [Prunus persica]	186	8e-65
ColeSingleton14261	395	CAN70998	hypothetical protein VITISV_023635 [Vitis vinifera]	105	7e-21
ColeSingleton14262	484	CBI35858	unnamed protein product [Vitis vinifera]	281	7e-74
ColeSingleton14266	327	EMJ26392	hypothetical protein PRUPE_ppa002112mg [Prunus persica]	75.5	2e-27
ColeSingleton14267	501	XP_002325112	predicted protein [Populus trichocarpa] predicted protein [Populus trichocarpa]	89.7	1e-20
ColeSingleton14268	442	EPS62501	hypothetical protein M569_12289, partial [Genlisea aurea]	258	4e-67
ColeSingleton14270	170	AAT40504	Polyprotein, putative [Solanum demissum]	70.5	2e-10
ColeSingleton14271	439	XP_002281188	PREDICTED: uncharacterized protein LOC100242078 [Vitis vinifera]	127	2e-38
ColeSingleton14272	440	BAD23759	ribosomal protein-like [Oryza sativa Japonica Group]	73.6	2e-25
ColeSingleton14278	436	CBI31124	unnamed protein product [Vitis vinifera]	102	3e-30
ColeSingleton14279	339	CBI39748	unnamed protein product [Vitis vinifera]	134	1e-29
ColeSingleton14280	362	EOY12856	White-brown-complex ABC transporter family [Theobroma cacao]	101	1e-28
ColeSingleton14284	296	EMJ10705	hypothetical protein PRUPE_ppa010392mg [Prunus persica]	100	1e-19
ColeSingleton14285	144	XP_002312932	predicted protein [Populus trichocarpa] predicted protein [Populus trichocarpa]	62	7e-08
ColeSingleton14287	243	XP_002272687	PREDICTED: uncharacterized protein LOC100264171 [Vitis vinifera]	59.3	4e-07
ColeSingleton14288	284	XP_002275561	PREDICTED: actin-related protein 4-like [Vitis vinifera]	67.4	3e-22
ColeSingleton14290	256	XP_003546752	PREDICTED: secologanin synthase-like [Glycine max]	67.4	2e-09
ColeSingleton14291	208	EPS74681	hypothetical protein M569_00056, partial [Genlisea aurea]	63.5	2e-08
ColeSingleton14293	230	ABW75772	lipoxygenase [Camellia sinensis]	129	3e-28
ColeSingleton14295	459	XP_002315542	predicted protein [Populus trichocarpa] predicted protein [Populus trichocarpa]	127	1e-27
ColeSingleton14296	447	EMJ20084	hypothetical protein PRUPE_ppa000183mg [Prunus persica]	166	4e-47
ColeSingleton14299	367	XP_002303278	predicted protein [Populus trichocarpa] predicted protein [Populus trichocarpa]	84.3	1e-14
ColeSingleton14300	442	CBI35445	unnamed protein product [Vitis vinifera]	173	2e-41
ColeSingleton14301	421	XP_002510630	multicopper oxidase, putative [Ricinus communis] multicopper oxidase, putative [Ricinus communis]	233	2e-59
ColeSingleton14310	463	XP_002283225	PREDICTED: tRNA-dihydrouridine synthase 1-like [Vitis vinifera]	141	7e-37
ColeSingleton14318	323	EOY12062	Zinc transporter 11 precursor [Theobroma cacao]	89	1e-17
ColeSingleton14319	202	EMJ16210	hypothetical protein PRUPE_ppa002494mg [Prunus persica]	79.3	4e-13
ColeSingleton14327	291	EOY24879	Reticulan like protein B3, putative isoform 3, partial [Theobroma cacao]	150	1e-34
ColeSingleton14328	330	EOY21524	3,4-dihydroxy-2-butanone kinase, putative [Theobroma cacao]	137	2e-30
ColeSingleton14329	456	NP_001267860	CBL-interacting protein kinase 13 [Vitis vinifera] CBL-interacting protein kinase 13 [Vitis vinifera]	111	2e-32
ColeSingleton14330	403	ACJ02359	hypothetical protein [Populus tremula x Populus alba]	140	1e-31
ColeSingleton14336	370	AFP55537	retrotransposon polyprotein [Rosa rugosa]	130	1e-28
ColeSingleton14337	373	XP_002281678	PREDICTED: uncharacterized protein LOC100245744 [Vitis vinifera]	79.7	3e-13
ColeSingleton14340	414	EOY33735	RING/U-box superfamily protein isoform 1 [Theobroma cacao]	83.2	5e-26
ColeSingleton14343	475	XP_002334623	predicted protein [Populus trichocarpa] predicted protein [Populus trichocarpa]	120	1e-25
ColeSingleton14344	448	EOY08158	Calcineurin-like metallo-phosphoesterase superfamily protein isoform 3 [Theobroma cacao]	151	8e-35
ColeSingleton14345	483	XP_002519105	Protein ariadne-1, putative [Ricinus communis] Protein ariadne-1, putative [Ricinus communis]	159	2e-37
ColeSingleton14346	203	EMJ26494	hypothetical protein PRUPE_ppa001330mg [Prunus persica]	108	6e-22
ColeSingleton14347	236	XP_002513884	conserved hypothetical protein [Ricinus communis] conserved hypothetical protein [Ricinus communis]	117	2e-24
ColeSingleton14351	210	EOY25949	Sterile alpha motif domain-containing protein [Theobroma cacao]	90.5	2e-17
ColeSingleton14352	447	XP_002264217	PREDICTED: ATP-dependent Clp protease ATP-binding subunit ClpX-like [Vitis vinifera]	139	9e-38
ColeSingleton14353	231	EOA33383	hypothetical protein CARUB_v10020333mg [Capsella rubella]	56.2	5e-08
ColeSingleton14355	478	AFE56211	terpene synthase [Camellia sinensis]	308	4e-82
ColeSingleton14356	367	CBI24291	unnamed protein product [Vitis vinifera]	66.2	3e-09
ColeSingleton14358	511	EOX93358	Myzus persicae-induced lipase 1 [Theobroma cacao]	166	3e-39
ColeSingleton14360	361	XP_002303445	predicted protein [Populus trichocarpa] predicted protein [Populus trichocarpa]	116	1e-24
ColeSingleton14362	432	XP_002264617	PREDICTED: uncharacterized protein LOC100256296 [Vitis vinifera] unnamed protein product [Vitis vinifera]	127	1e-27
ColeSingleton14369	266	XP_002317560	predicted protein [Populus trichocarpa] predicted protein [Populus trichocarpa]	124	1e-26
ColeSingleton14370	428	CAN65842	hypothetical protein VITISV_027369 [Vitis vinifera]	120	3e-40
ColeSingleton14371	426	XP_004291449	PREDICTED: uncharacterized protein LOC101308736 [Fragaria vesca subsp. vesca]	226	2e-57
ColeSingleton14374	194	XP_004238911	PREDICTED: uncharacterized protein LOC101249358 [Solanum lycopersicum]	67	1e-12
ColeSingleton14377	218	XP_002527240	hypothetical protein RCOM_0231790 [Ricinus communis] hypothetical protein RCOM_0231790 [Ricinus communis]	79.7	3e-13
ColeSingleton14380	470	CBI32274	unnamed protein product [Vitis vinifera]	61.2	1e-07
ColeSingleton14381	422	EOY01270	Kinase, putative [Theobroma cacao]	77.4	2e-12
ColeSingleton14383	482	XP_002285869	PREDICTED: uncharacterized protein LOC100260874 [Vitis vinifera]	227	5e-64
ColeSingleton14384	498	EMJ16900	hypothetical protein PRUPE_ppa008810mg [Prunus persica]	211	7e-53
ColeSingleton14388	431	XP_002300145	predicted protein [Populus trichocarpa] predicted protein [Populus trichocarpa]	198	4e-49
ColeSingleton14389	459	XP_004306806	PREDICTED: DEAD-box ATP-dependent RNA helicase 8-like [Fragaria vesca subsp. vesca]	157	1e-58
ColeSingleton14394	419	EMJ23373	hypothetical protein PRUPE_ppa007762mg [Prunus persica]	132	2e-38
ColeSingleton14395	354	CBI20165	unnamed protein product [Vitis vinifera]	132	5e-29
ColeSingleton14397	152	XP_002523148	Reticuline oxidase precursor, putative [Ricinus communis] Reticuline oxidase precursor, putative [Ricinus communis]	55.8	8e-08
ColeSingleton14398	345	XP_002308884	predicted protein [Populus trichocarpa] predicted protein [Populus trichocarpa]	153	2e-35
ColeSingleton14402	469	EOY17779	Phosphoinositide-specific phospholipase C family protein [Theobroma cacao]	80.5	9e-19
ColeSingleton14404	275	XP_003537112	PREDICTED: uncharacterized protein LOC100782398 [Glycine max]	64.3	1e-08
ColeSingleton14405	421	AGA82513	sucrose phosphate synthase, partial [Camellia sinensis]	263	1e-68
ColeSingleton14409	416	XP_004144895	PREDICTED: phosphate carrier protein, mitochondrial-like [Cucumis sativus] PREDICTED: phosphate carrier protein, mitochondrial-like [Cucumis sativus]	139	8e-49
ColeSingleton14414	356	XP_002284775	PREDICTED: syntaxin-32 [Vitis vinifera] unnamed protein product [Vitis vinifera]	147	2e-33
ColeSingleton14415	261	EMJ11514	hypothetical protein PRUPE_ppa002272mg [Prunus persica]	87.4	1e-15
ColeSingleton14416	469	EOY08323	Uncharacterized protein TCM_022663 [Theobroma cacao]	141	8e-32
ColeSingleton14419	269	XP_004251475	PREDICTED: electron transfer flavoprotein subunit alpha, mitochondrial-like [Solanum lycopersicum]	118	8e-25
ColeSingleton14424	362	XP_002272794	PREDICTED: uncharacterized protein LOC100244627 isoform 1 [Vitis vinifera] PREDICTED: uncharacterized protein LOC100244627 isoform 2 [Vitis vinifera]	117	1e-24
ColeSingleton14426	406	CAN66510	hypothetical protein VITISV_003620 [Vitis vinifera]	65.9	4e-09
ColeSingleton14427	522	XP_002279219	PREDICTED: AUX-1-like protein [Vitis vinifera] unnamed protein product [Vitis vinifera]	171	6e-41
ColeSingleton14428	523	EMJ14671	hypothetical protein PRUPE_ppa023920mg [Prunus persica]	153	2e-35
ColeSingleton14429	356	XP_002517664	conserved hypothetical protein [Ricinus communis] conserved hypothetical protein [Ricinus communis]	111	3e-30
ColeSingleton14431	475	XP_002303948	predicted protein [Populus trichocarpa] predicted protein [Populus trichocarpa]	100	9e-29
ColeSingleton14433	455	EMJ09661	hypothetical protein PRUPE_ppa003942mg [Prunus persica]	129	1e-31
ColeSingleton14436	184	XP_003521744	PREDICTED: peptide-N(4)-(N-acetyl-beta-glucosaminyl)asparagine amidase-like [Glycine max]	71.6	1e-15
ColeSingleton14438	107	XP_004309024	PREDICTED: uncharacterized protein At3g06530-like [Fragaria vesca subsp. vesca]	64.3	1e-08
ColeSingleton14442	398	EOX92768	Carboxyesterase 18 [Theobroma cacao]	137	1e-30
ColeSingleton14443	422	EOY28251	Pentatricopeptide repeat superfamily protein [Theobroma cacao]	180	2e-43
ColeSingleton14445	568	EMJ06679	hypothetical protein PRUPE_ppa008094mg [Prunus persica]	87	2e-15
ColeSingleton14447	266	EPS57930	hypothetical protein M569_16886, partial [Genlisea aurea]	130	1e-28
ColeSingleton14451	554	XP_004252346	PREDICTED: dynein light chain LC6, flagellar outer arm-like [Solanum lycopersicum]	161	7e-38
ColeSingleton14453	295	EMJ20546	hypothetical protein PRUPE_ppa019419mg [Prunus persica]	112	6e-23
ColeSingleton14456	374	EOY18700	Serine protease inhibitor [Theobroma cacao]	65.9	5e-09
ColeSingleton14458	328	EOY12857	Beta-glucosidase 45, putative [Theobroma cacao]	145	6e-33
ColeSingleton14461	404	AAS21304	mitogen-activated protein kinase kinase 2 [Petroselinum crispum]	219	3e-55
ColeSingleton14462	265	XP_002284126	PREDICTED: serpin-ZX [Vitis vinifera]	100	1e-19
ColeSingleton14466	238	XP_003631869	PREDICTED: uncharacterized protein LOC100261651 [Vitis vinifera]	101	2e-26
ColeSingleton14469	345	AAT41870	putative phosphoglyceride transfer family protein [Hevea brasiliensis]	117	3e-35
ColeSingleton14471	453	XP_003535730	PREDICTED: uncharacterized protein LOC100784523 [Glycine max]	167	1e-39
ColeSingleton14472	315	XP_004143645	PREDICTED: fructokinase-1-like [Cucumis sativus] PREDICTED: fructokinase-1-like [Cucumis sativus]	135	6e-30
ColeSingleton14473	482	XP_002520758	conserved hypothetical protein [Ricinus communis] conserved hypothetical protein [Ricinus communis]	295	4e-78
ColeSingleton14481	467	EOY05146	DNA repair-recombination protein (RAD50) isoform 1 [Theobroma cacao]	257	1e-66
ColeSingleton14484	518	ABD63162	RNase H family protein [Asparagus officinalis]	154	1e-35
ColeSingleton14487	437	CBI25465	unnamed protein product [Vitis vinifera]	135	5e-30
ColeSingleton14490	457	XP_002305430	predicted protein [Populus trichocarpa] predicted protein [Populus trichocarpa]	116	3e-24
ColeSingleton14493	286	EMJ08530	hypothetical protein PRUPE_ppa006377mg [Prunus persica]	110	2e-22
ColeSingleton14497	405	XP_002317001	predicted protein [Populus trichocarpa] predicted protein [Populus trichocarpa]	99	1e-20
ColeSingleton14499	442	XP_002283711	PREDICTED: E3 ubiquitin-protein ligase UPL2-like [Vitis vinifera]	145	6e-35
ColeSingleton14501	139	EMJ05135	hypothetical protein PRUPE_ppa017387mg [Prunus persica]	57.8	1e-06
ColeSingleton14502	199	EOX93262	Uncharacterized protein TCM_002116 [Theobroma cacao]	107	1e-21
ColeSingleton14505	417	XP_002282784	PREDICTED: uncharacterized protein LOC100245904 [Vitis vinifera]	88.6	6e-16
ColeSingleton14507	413	AFW79619	hypothetical protein ZEAMMB73_444016 [Zea mays]	169	3e-40
ColeSingleton14508	305	XP_002317358	predicted protein [Populus trichocarpa] predicted protein [Populus trichocarpa]	60.1	2e-07
ColeSingleton14509	481	XP_003531296	PREDICTED: magnesium transporter MRS2-4-like [Glycine max]	135	6e-30
ColeSingleton14510	281	XP_004233805	PREDICTED: uncharacterized protein LOC101262589 [Solanum lycopersicum]	114	1e-23
ColeSingleton14512	528	XP_004136097	PREDICTED: probable GMP synthase [glutamine-hydrolyzing]-like [Cucumis sativus]	84	2e-23
ColeSingleton14513	278	XP_004293140	PREDICTED: protein kinase 2B, chloroplastic-like [Fragaria vesca subsp. vesca]	129	4e-28
ColeSingleton14514	324	XP_004248258	PREDICTED: early nodulin-like protein 1-like [Solanum lycopersicum]	117	2e-24
ColeSingleton14515	296	XP_002531146	nucleic acid binding protein, putative [Ricinus communis] nucleic acid binding protein, putative [Ricinus communis]	47.8	5e-08
ColeSingleton14519	332	EOY15029	Cytomatrix protein-related, putative [Theobroma cacao]	59.7	3e-07
ColeSingleton14520	467	EOY23083	Per1-like family protein [Theobroma cacao]	123	8e-37
ColeSingleton14522	184	EMJ22106	hypothetical protein PRUPE_ppa001080mg [Prunus persica]	114	1e-23
ColeSingleton14527	494	EMJ02012	hypothetical protein PRUPE_ppa025698mg, partial [Prunus persica]	82.8	4e-14
ColeSingleton14528	490	XP_002526391	nucleic acid binding protein, putative [Ricinus communis] nucleic acid binding protein, putative [Ricinus communis]	261	4e-68
ColeSingleton14529	603	CAN80093	hypothetical protein VITISV_010721 [Vitis vinifera]	88.6	1e-21
ColeSingleton14531	412	XP_004493324	PREDICTED: cysteine proteinase inhibitor 12-like [Cicer arietinum]	60.1	2e-07
ColeSingleton14532	440	XP_003556641	PREDICTED: uncharacterized protein LOC100814525 [Glycine max]	53.9	2e-11
ColeSingleton14540	364	XP_002281160	PREDICTED: thioredoxin-related transmembrane protein 2 [Vitis vinifera]	75.1	7e-12
ColeSingleton14541	360	XP_002310331	predicted protein [Populus trichocarpa] predicted protein [Populus trichocarpa]	67	2e-09
ColeSingleton14544	270	CAN81035	hypothetical protein VITISV_011008 [Vitis vinifera]	66.6	7e-16
ColeSingleton14545	301	XP_003634177	PREDICTED: uncharacterized protein LOC100853355 [Vitis vinifera] unnamed protein product [Vitis vinifera]	73.2	3e-11
ColeSingleton14548	412	XP_002281198	PREDICTED: sodium/hydrogen exchanger 2-like [Vitis vinifera] unnamed protein product [Vitis vinifera]	141	3e-35
ColeSingleton14549	134	XP_004139812	PREDICTED: 40S ribosomal protein S5-1-like [Cucumis sativus] PREDICTED: 40S ribosomal protein S5-1-like [Cucumis sativus]	71.6	8e-11
ColeSingleton14551	464	XP_002274448	PREDICTED: uncharacterized membrane protein YOL092W-like [Vitis vinifera] unnamed protein product [Vitis vinifera]	192	4e-47
ColeSingleton14552	246	EMJ09282	hypothetical protein PRUPE_ppa001499mg [Prunus persica]	90.1	2e-16
ColeSingleton14554	475	EMJ27376	hypothetical protein PRUPE_ppa015523mg [Prunus persica]	157	6e-52
ColeSingleton14559	393	XP_004236584	PREDICTED: DNA helicase INO80-like [Solanum lycopersicum]	114	2e-43
ColeSingleton14561	313	CAN74319	hypothetical protein VITISV_035345 [Vitis vinifera]	121	9e-26
ColeSingleton14564	269	XP_002277637	PREDICTED: uncharacterized protein LOC100267009 [Vitis vinifera]	70.5	1e-10
ColeSingleton14566	500	AAF79822	T6D22.2 [Arabidopsis thaliana]	66.6	6e-12
ColeSingleton14569	312	XP_004246251	PREDICTED: uncharacterized protein LOC101248905 [Solanum lycopersicum]	103	1e-20
ColeSingleton14571	437	EHY57905	ENT family equilibrative nucleoside transporter [Exophiala dermatitidis NIH/UT8656]	202	4e-50
ColeSingleton14575	263	XP_002303078	predicted protein [Populus trichocarpa] predicted protein [Populus trichocarpa]	102	3e-20
ColeSingleton14576	470	XP_002327502	predicted protein [Populus trichocarpa] predicted protein [Populus trichocarpa]	174	1e-41
ColeSingleton14577	391	XP_002516721	Poly(rC)-binding protein, putative [Ricinus communis] Poly(rC)-binding protein, putative [Ricinus communis]	70.5	2e-10
ColeSingleton14579	428	XP_004229980	PREDICTED: uncharacterized protein LOC101251330 [Solanum lycopersicum]	85.9	4e-15
ColeSingleton14581	477	XP_002511177	hypothetical protein RCOM_1506010 [Ricinus communis] hypothetical protein RCOM_1506010 [Ricinus communis]	74.3	1e-11
ColeSingleton14591	463	WP_001578498	trimethylamine-N-oxide reductase 2 [Escherichia coli] trimethylamine-N-oxide reductase 2 [Escherichia coli KTE9] trimethylamine-N-oxide reductase 2 [Escherichia coli KTE78] trimethylamine-N-oxide reductase 2 [Escherichia coli KTE79]	147	9e-34
ColeSingleton1262	339	CBI32705	unnamed protein product [Vitis vinifera]	71.6	8e-11
ColeSingleton1264	496	XP_003631587	PREDICTED: DEAD-box ATP-dependent RNA helicase 21-like [Vitis vinifera]	312	3e-83
ColeSingleton1265	387	CAN82134	hypothetical protein VITISV_002644 [Vitis vinifera]	53.9	7e-09
ColeSingleton1267	218	CBI35984	unnamed protein product [Vitis vinifera]	83.2	3e-14
ColeSingleton1271	153	EOY20835	Myb domain protein 86 [Theobroma cacao]	86.3	3e-15
ColeSingleton1273	423	XP_002282016	PREDICTED: uncharacterized protein LOC100262933 [Vitis vinifera]	171	8e-49
ColeSingleton1274	505	EOY09463	RNA-binding family protein isoform 3 [Theobroma cacao]	96.3	3e-18
ColeSingleton1275	504	XP_002272921	PREDICTED: uncharacterized protein LOC100245146 [Vitis vinifera] unnamed protein product [Vitis vinifera]	183	2e-44
ColeSingleton1277	255	EPS58050	hypothetical protein M569_16767 [Genlisea aurea]	62.4	5e-08
ColeSingleton1279	438	EOY15136	LYR family of Fe/S cluster biogenesis protein [Theobroma cacao]	60.8	1e-07
ColeSingleton1280	451	XP_002521616	RING-H2 finger protein ATL3F, putative [Ricinus communis] RING-H2 finger protein ATL3F, putative [Ricinus communis]	61.2	1e-07
ColeSingleton1283	440	CAN61115	hypothetical protein VITISV_035585 [Vitis vinifera]	175	5e-42
ColeSingleton1284	450	YP_008115433	putative oxidoreductase [Pseudomonas putida NBRC 14164] putative oxidoreductase [Pseudomonas putida] putative oxidoreductase [Pseudomonas putida NBRC 14164]	265	3e-76
ColeSingleton1286	494	XP_004245391	PREDICTED: uncharacterized protein LOC101249112 [Solanum lycopersicum]	99.8	3e-19
ColeSingleton1289	473	XP_002518647	nucleotide binding protein, putative [Ricinus communis] nucleotide binding protein, putative [Ricinus communis]	98.6	8e-22
ColeSingleton1290	334	CCG84230	protein of unknown function [Taphrina deformans PYCC 5710]	135	5e-30
ColeSingleton1293	476	CAN70998	hypothetical protein VITISV_023635 [Vitis vinifera]	65.1	1e-13
ColeSingleton1295	342	XP_002263799	PREDICTED: uncharacterized protein LOC100244360 [Vitis vinifera]	136	2e-30
ColeSingleton1297	286	CBI17463	unnamed protein product [Vitis vinifera]	92	6e-17
ColeSingleton1299	457	EMJ10488	hypothetical protein PRUPE_ppa007665mg [Prunus persica]	71.2	1e-10
ColeSingleton1302	145	CBI15926	unnamed protein product [Vitis vinifera]	94	2e-17
ColeSingleton1311	475	XP_002323067	predicted protein [Populus trichocarpa] predicted protein [Populus trichocarpa]	228	3e-69
ColeSingleton1315	355	XP_003632584	PREDICTED: phosphatidylinositide phosphatase SAC1-like isoform 2 [Vitis vinifera]	75.1	7e-12
ColeSingleton1316	450	XP_002275995	PREDICTED: aluminum-activated malate transporter 9-like [Vitis vinifera]	235	1e-61
ColeSingleton1317	476	XP_004139204	PREDICTED: LOW QUALITY PROTEIN: probable cation-transporting ATPase-like [Cucumis sativus]	144	2e-39
ColeSingleton1320	486	AAI55663	LOC563369 protein [Danio rerio]	68.6	7e-10
ColeSingleton1325	485	AFK41181	unknown [Lotus japonicus]	65.9	4e-09
ColeSingleton1326	199	XP_002308674	predicted protein [Populus trichocarpa] predicted protein [Populus trichocarpa]	114	8e-24
ColeSingleton1329	294	XP_003632203	PREDICTED: E3 UFM1-protein ligase 1 homolog isoform 2 [Vitis vinifera]	94	3e-26
ColeSingleton1333	321	XP_003635007	PREDICTED: ethylene-responsive transcription factor-like protein At4g13040-like, partial [Vitis vinifera]	60.1	2e-07
ColeSingleton1334	390	XP_002270724	PREDICTED: transforming growth factor-beta receptor-associated protein 1 homolog [Vitis vinifera] unnamed protein product [Vitis vinifera]	224	1e-56
ColeSingleton1336	454	XP_004237148	PREDICTED: putative late blight resistance protein homolog R1A-10-like [Solanum lycopersicum]	61.2	1e-07
ColeSingleton1338	304	EOY01789	T-box transcription factor TBX5, putative isoform 1 [Theobroma cacao] T-box transcription factor TBX5, putative isoform 1 [Theobroma cacao]	115	4e-24
ColeSingleton1340	376	EOY34710	Kinase interacting family protein, putative isoform 2 [Theobroma cacao] Kinase interacting family protein, putative isoform 2 [Theobroma cacao]	145	4e-33
ColeSingleton1344	260	XP_002279962	PREDICTED: neutral ceramidase-like [Vitis vinifera]	94.4	3e-34
ColeSingleton1345	407	XP_004148119	PREDICTED: receptor-like serine/threonine-protein kinase At4g25390-like [Cucumis sativus]	100	2e-27
ColeSingleton1346	518	XP_002265377	PREDICTED: zinc finger protein CONSTANS-LIKE 10 [Vitis vinifera]	63.2	4e-13
ColeSingleton1352	512	XP_004140283	PREDICTED: chromodomain-helicase-DNA-binding protein 2-like [Cucumis sativus]	140	5e-36
ColeSingleton1354	495	XP_003520932	PREDICTED: OTU domain-containing protein At3g57810-like [Glycine max]	91.7	3e-27
ColeSingleton1355	320	ELT97425	hypothetical protein CAPTEDRAFT_194915 [Capitella teleta]	56.2	4e-06
ColeSingleton1357	429	XP_002326499	predicted protein [Populus trichocarpa] predicted protein [Populus trichocarpa]	62	7e-12
ColeSingleton1358	264	EMJ12113	hypothetical protein PRUPE_ppa000404mg [Prunus persica]	125	4e-27
ColeSingleton1361	401	YP_007317307	Ycf1 (chloroplast) [Camellia sinensis] Ycf1 (chloroplast) [Camellia sinensis]	125	5e-37
ColeSingleton1363	300	XP_004247741	PREDICTED: casein kinase I isoform delta-like [Solanum lycopersicum]	78.2	9e-13
ColeSingleton1364	488	XP_003542982	PREDICTED: CBL-interacting serine/threonine-protein kinase 12-like [Glycine max]	234	7e-78
ColeSingleton14598	422	XP_002322921	aldose reductase with ABC domain [Populus trichocarpa] aldose reductase with ABC domain [Populus trichocarpa]	273	1e-71
ColeSingleton14599	417	XP_002271921	PREDICTED: uncharacterized protein LOC100263462 [Vitis vinifera]	57	2e-06
ColeSingleton14600	381	EOY02437	DNA (Cytosine-5)-methyltransferase DRM1/2 isoform 4 [Theobroma cacao]	233	2e-59
ColeSingleton14602	504	XP_004138900	PREDICTED: dynamin-related protein 4C-like isoform 2 [Cucumis sativus]	61.6	8e-08
ColeSingleton14603	451	ADN34053	starch synthase [Cucumis melo subsp. melo]	140	9e-38
ColeSingleton14604	259	XP_002282486	PREDICTED: N-alpha-acetyltransferase 35, NatC auxiliary subunit-like [Vitis vinifera]	119	3e-25
ColeSingleton14605	518	EOX93775	Receptor-like protein kinase-related family protein, putative [Theobroma cacao]	168	6e-40
ColeSingleton14606	424	XP_004234368	PREDICTED: inactive rhomboid protein 1-like [Solanum lycopersicum]	211	9e-53
ColeSingleton14608	441	CBI17489	unnamed protein product [Vitis vinifera]	93.2	1e-27
ColeSingleton14610	482	XP_002270342	PREDICTED: ankyrin repeat and zinc finger domain-containing protein 1-like [Vitis vinifera]	124	4e-39
ColeSingleton14612	516	XP_004503410	PREDICTED: N6-adenosine-methyltransferase MT-A70-like isoform X2 [Cicer arietinum]	294	8e-78
ColeSingleton14619	419	XP_004137880	PREDICTED: uncharacterized protein LOC101211076 [Cucumis sativus]	122	5e-26
ColeSingleton14625	480	XP_002263131	PREDICTED: probable 2-oxoglutarate/Fe(II)-dependent dioxygenase-like [Vitis vinifera]	140	3e-64
ColeSingleton14626	244	EMJ07028	hypothetical protein PRUPE_ppa010967mg [Prunus persica]	117	1e-24
ColeSingleton14628	182	NP_001267927	CBL-interacting protein kinase 14 [Vitis vinifera] CBL-interacting protein kinase 14 [Vitis vinifera] unnamed protein product [Vitis vinifera]	91.7	7e-17
ColeSingleton14629	473	XP_002273712	PREDICTED: transcription initiation factor TFIID subunit 1-A-like [Vitis vinifera]	200	2e-49
ColeSingleton14632	521	XP_002284065	PREDICTED: phosphoserine phosphatase, chloroplastic [Vitis vinifera] unnamed protein product [Vitis vinifera]	185	1e-59
ColeSingleton14633	432	XP_002284562	PREDICTED: probable ADP-ribosylation factor GTPase-activating protein AGD5-like isoform 1 [Vitis vinifera]	73.2	3e-11
ColeSingleton14636	349	EMJ01993	hypothetical protein PRUPE_ppa024591mg [Prunus persica]	105	9e-34
ColeSingleton14638	326	XP_004173271	PREDICTED: uncharacterized LOC101203466, partial [Cucumis sativus]	79.3	4e-13
ColeSingleton14641	472	XP_004145519	PREDICTED: homeobox protein knotted-1-like 3-like [Cucumis sativus] PREDICTED: homeobox protein knotted-1-like 3-like [Cucumis sativus]	60.8	1e-07
ColeSingleton14643	429	EOY19991	Cysteine/Histidine-rich C1 domain family protein, putative isoform 3 [Theobroma cacao]	88.6	6e-16
ColeSingleton14645	338	XP_002267809	PREDICTED: pentatricopeptide repeat-containing protein At2g17670-like [Vitis vinifera]	60.5	2e-07
ColeSingleton14651	396	CCE28484	probable mitochondrial ferredoxin [Claviceps purpurea 20.1]	181	1e-43
ColeSingleton14655	480	XP_002271192	PREDICTED: protein KTI12 homolog [Vitis vinifera]	150	1e-64
ColeSingleton14656	355	XP_002279963	PREDICTED: uncharacterized protein LOC100265339 [Vitis vinifera]	85.5	5e-15
ColeSingleton14660	389	EOX95616	CDPK-related kinase 3 isoform 1 [Theobroma cacao]	50.8	1e-11
ColeSingleton14666	370	XP_002277271	PREDICTED: ABC transporter G family member 2 [Vitis vinifera]	119	4e-25
ColeSingleton14667	419	EOX92556	GDP-mannose transporter, putative [Theobroma cacao]	107	2e-21
ColeSingleton14675	515	XP_004249494	PREDICTED: protein FAR1-RELATED SEQUENCE 12-like [Solanum lycopersicum]	135	4e-50
ColeSingleton14679	475	XP_002519035	conserved hypothetical protein [Ricinus communis] conserved hypothetical protein [Ricinus communis]	166	3e-39
ColeSingleton14681	446	XP_004249351	PREDICTED: protein TRANSPARENT TESTA 12-like [Solanum lycopersicum]	149	6e-53
ColeSingleton14682	510	CAN82949	hypothetical protein VITISV_018262 [Vitis vinifera]	58.5	7e-07
ColeSingleton14683	270	XP_002533331	conserved hypothetical protein [Ricinus communis] conserved hypothetical protein [Ricinus communis]	62.4	5e-08
ColeSingleton14684	302	ACA42564	hypothetical protein [Camellia sinensis]	119	4e-25
ColeSingleton14686	455	EMJ02572	hypothetical protein PRUPE_ppa007775mg [Prunus persica]	188	5e-46
ColeSingleton14696	409	AEZ49168	SNF1-related protein kinase regulatory beta subunit 1 [Wolffia australiana]	62.8	4e-08
ColeSingleton14700	423	XP_003527227	PREDICTED: uncharacterized protein LOC100785671 [Glycine max]	74.7	1e-11
ColeSingleton14705	224	XP_004145775	PREDICTED: bifunctional polymyxin resistance protein ArnA-like [Cucumis sativus] PREDICTED: bifunctional polymyxin resistance protein ArnA-like [Cucumis sativus]	79.3	4e-13
ColeSingleton14708	307	XP_002277561	PREDICTED: UPF0057 membrane protein At4g30650 [Vitis vinifera] hypothetical protein VITISV_004807 [Vitis vinifera] hypothetical protein VITISV_002031 [Vitis vinifera] unnamed protein product [Vitis vinifera]	90.1	2e-17
ColeSingleton14710	177	XP_002322764	white-brown-complex ABC transporter family [Populus trichocarpa] white-brown-complex ABC transporter family [Populus trichocarpa]	89.4	4e-16
ColeSingleton14721	403	XP_002512182	conserved hypothetical protein [Ricinus communis] conserved hypothetical protein [Ricinus communis]	214	1e-57
ColeSingleton14725	343	XP_002530135	conserved hypothetical protein [Ricinus communis] conserved hypothetical protein [Ricinus communis]	70.1	2e-10
ColeSingleton14728	358	CBI31887	unnamed protein product [Vitis vinifera]	120	2e-42
ColeSingleton14729	382	XP_002311308	predicted protein [Populus trichocarpa] predicted protein [Populus trichocarpa]	67.8	1e-09
ColeSingleton14730	168	EJY66654	hypothetical protein OXYTRI_13059 [Oxytricha trifallax]	65.9	4e-09
ColeSingleton14732	389	XP_004171686	PREDICTED: cytochrome P450 89A2-like [Cucumis sativus]	189	3e-46
ColeSingleton14734	354	XP_002533739	Indole-3-acetic acid-amido synthetase GH3.6, putative [Ricinus communis] Indole-3-acetic acid-amido synthetase GH3.6, putative [Ricinus communis]	121	7e-26
ColeSingleton14735	463	XP_003633812	PREDICTED: probable peptide/nitrate transporter At5g14940-like [Vitis vinifera]	235	3e-60
ColeSingleton14736	378	XP_002280393	PREDICTED: disease resistance protein RPM1-like [Vitis vinifera]	107	4e-31
ColeSingleton14737	466	CBI28120	unnamed protein product [Vitis vinifera]	171	1e-40
ColeSingleton14739	156	CBI15261	unnamed protein product [Vitis vinifera]	66.6	3e-09
ColeSingleton14741	178	XP_005071096	PREDICTED: zinc finger CCCH domain-containing protein 13 [Mesocricetus auratus]	59.3	4e-07
ColeSingleton14742	307	EOY12607	Autophagy 18 F isoform 4 [Theobroma cacao]	111	7e-23
ColeSingleton14743	317	EMJ24945	hypothetical protein PRUPE_ppa010512mg [Prunus persica]	61.6	9e-08
ColeSingleton14745	371	XP_003522103	PREDICTED: scarecrow-like protein 9-like [Glycine max]	81.6	8e-14
ColeSingleton14747	290	CBI26420	unnamed protein product [Vitis vinifera]	116	3e-24
ColeSingleton14750	355	CAN73763	hypothetical protein VITISV_031179 [Vitis vinifera]	94.7	9e-18
ColeSingleton14751	423	NP_180568	potassium transporter 1 [Arabidopsis thaliana] RecName: Full=Potassium transporter 1; Short=AtKT1; Short=AtKUP1; Short=AtPOT1 potassium transporter [Arabidopsis thaliana] high-affinity potassium transporter [Arabidopsis thaliana] high affinity K+ transporter (AtKUP1/AtKT1p) [Arabidopsis thaliana] high affinity K+ transporter (AtKUP1 AtKT1p) [Arabidopsis thaliana] high affinity K+ transporter [Ara…	113	1e-39
ColeSingleton14752	173	XP_004497066	PREDICTED: uncharacterized protein LOC101490811 [Cicer arietinum]	109	4e-22
ColeSingleton14753	133	XP_002269340	PREDICTED: nitrate transporter 1.7 [Vitis vinifera] unnamed protein product [Vitis vinifera]	82.8	4e-14
ColeSingleton14754	218	AFU25705	gag-pol precursor [Castanea mollissima]	90.9	1e-16
ColeSingleton14762	238	XP_002511058	tyrosyl-DNA phosphodiesterase, putative [Ricinus communis] tyrosyl-DNA phosphodiesterase, putative [Ricinus communis]	150	1e-34
ColeSingleton14764	487	EOY13832	FAD/NAD(P)-binding oxidoreductase family protein isoform 2 [Theobroma cacao]	112	6e-23
ColeSingleton14770	424	XP_002279225	PREDICTED: F-box protein PP2-B15-like [Vitis vinifera]	102	6e-23
ColeSingleton14773	481	XP_004296385	PREDICTED: phosphate transporter PHO1-like [Fragaria vesca subsp. vesca]	155	4e-36
ColeSingleton14776	219	CAN64449	hypothetical protein VITISV_008912 [Vitis vinifera]	84	2e-14
ColeSingleton14781	173	CBI27626	unnamed protein product [Vitis vinifera]	80.5	2e-13
ColeSingleton14784	360	XP_003633745	PREDICTED: EVI5-like protein-like [Vitis vinifera]	78.6	7e-13
ColeSingleton14787	424	XP_002531506	Pectinesterase-2 precursor, putative [Ricinus communis] Pectinesterase-2 precursor, putative [Ricinus communis]	219	2e-55
ColeSingleton14788	331	XP_002534445	Minor allergen Alt a, putative [Ricinus communis] Minor allergen Alt a, putative [Ricinus communis]	137	3e-34
ColeSingleton14795	482	XP_004157277	PREDICTED: LOW QUALITY PROTEIN: kinesin-like protein KIFC3-like [Cucumis sativus]	94.4	1e-17
ColeSingleton14800	167	XP_004144174	PREDICTED: 14-3-3-like protein GF14 iota-like [Cucumis sativus] PREDICTED: 14-3-3-like protein GF14 iota-like [Cucumis sativus]	65.5	6e-09
ColeSingleton14801	505	CBI38014	unnamed protein product [Vitis vinifera]	94.7	9e-18
ColeSingleton14802	471	XP_003632240	PREDICTED: E3 ubiquitin-protein ligase RNF181-like [Vitis vinifera]	59.3	7e-17
ColeSingleton14804	478	EMJ11098	hypothetical protein PRUPE_ppa004151mg [Prunus persica]	60.1	2e-18
ColeSingleton14808	423	XP_002274449	PREDICTED: beta-galactosidase 3 [Vitis vinifera]	81.6	5e-28
ColeSingleton14818	292	ABB89016	CXE carboxylesterase [Actinidia deliciosa]	111	9e-23
ColeSingleton14825	191	EMJ20759	hypothetical protein PRUPE_ppa001281mg [Prunus persica]	103	6e-22
ColeSingleton14827	416	EOY06474	2-oxoglutarate and Fe(II)-dependent oxygenase superfamily protein isoform 2 [Theobroma cacao]	94.4	1e-17
ColeSingleton14830	370	EOY07997	Uncharacterized protein TCM_022315 [Theobroma cacao]	124	8e-27
ColeSingleton14832	191	CBI24916	unnamed protein product [Vitis vinifera]	39.7	4e-07
ColeSingleton14833	284	XP_002285022	PREDICTED: serine carboxypeptidase II-3 [Vitis vinifera]	75.9	4e-14
ColeSingleton14835	438	ADU55789	HSP18.1A [Citrullus lanatus]	82	6e-14
ColeSingleton14836	381	XP_004231640	PREDICTED: uncharacterized protein LOC101266775 [Solanum lycopersicum]	124	1e-26
ColeSingleton14838	491	XP_002306989	predicted protein [Populus trichocarpa] predicted protein [Populus trichocarpa]	65.5	6e-14
ColeSingleton14839	291	XP_002512380	pentatricopeptide repeat-containing protein, putative [Ricinus communis] pentatricopeptide repeat-containing protein, putative [Ricinus communis]	127	1e-27
ColeSingleton14842	471	XP_003538088	PREDICTED: serine/threonine-protein phosphatase BSL2-like [Glycine max]	183	4e-71
ColeSingleton14844	483	XP_004230969	PREDICTED: deSI-like protein At4g17486-like [Solanum lycopersicum]	136	3e-30
ColeSingleton14846	327	XP_003554654	PREDICTED: putative protease Do-like 14-like [Glycine max]	78.2	9e-13
ColeSingleton14847	477	XP_002282160	PREDICTED: protein CYPRO4-like [Vitis vinifera]	178	2e-50
ColeSingleton14848	306	CBI31929	unnamed protein product [Vitis vinifera]	86.3	3e-15
ColeSingleton14849	424	XP_004306493	PREDICTED: callose synthase 2-like [Fragaria vesca subsp. vesca]	197	3e-53
ColeSingleton14851	496	EOY14965	Iq-domain 32, putative isoform 1 [Theobroma cacao]	197	2e-52
ColeSingleton14859	204	CBI17310	unnamed protein product [Vitis vinifera]	63.5	1e-08
ColeSingleton14866	365	XP_004159883	PREDICTED: COBRA-like protein 1-like [Cucumis sativus]	129	4e-28
ColeSingleton14868	459	EOX94411	Non-intrinsic ABC protein 4 [Theobroma cacao]	211	9e-58
ColeSingleton14872	462	AEI83427	MYB transcription factor 1 [Camellia sinensis]	203	9e-61
ColeSingleton14874	469	EMJ26410	hypothetical protein PRUPE_ppa002012mg [Prunus persica]	216	2e-54
ColeSingleton14875	213	EMJ15551	hypothetical protein PRUPE_ppa000138mg [Prunus persica]	97.4	1e-18
ColeSingleton14878	365	CBI32346	unnamed protein product [Vitis vinifera]	180	1e-45
ColeSingleton14882	486	XP_002523133	aspartate ammonia lyase, putative [Ricinus communis] aspartate ammonia lyase, putative [Ricinus communis]	311	5e-83
ColeSingleton14888	409	EOY07235	Yippee family zinc-binding protein, putative isoform 2 [Theobroma cacao] Yippee family zinc-binding protein, putative isoform 2 [Theobroma cacao] Yippee family zinc-binding protein, putative isoform 2 [Theobroma cacao]	65.1	8e-09
ColeSingleton14889	285	YP_173481	hypothetical protein NitaMp144 [Nicotiana tabacum]	74.3	4e-14
ColeSingleton14891	373	BAD11327	glutamine synthetase [Camellia sinensis]	217	1e-54
ColeSingleton14898	330	AEJ07916	putative ZmL1 non-LTR retrotransposon protein [Zea mays]	65.1	8e-09
ColeSingleton14900	143	CBI24769	unnamed protein product [Vitis vinifera]	99	5e-19
ColeSingleton14901	490	XP_002532173	receptor protein kinase, putative [Ricinus communis] receptor protein kinase, putative [Ricinus communis]	232	3e-59
ColeSingleton14902	527	XP_004291134	PREDICTED: uncharacterized protein LOC101313275 [Fragaria vesca subsp. vesca]	85.1	9e-29
ColeSingleton14903	478	AFU25705	gag-pol precursor [Castanea mollissima]	103	3e-22
ColeSingleton14909	300	XP_002276345	PREDICTED: protein FRIGIDA-like [Vitis vinifera]	62	6e-08
ColeSingleton14912	406	CBI17376	unnamed protein product [Vitis vinifera]	116	3e-24
ColeSingleton14914	236	EJY66653	hypothetical protein OXYTRI_13058 [Oxytricha trifallax]	79	5e-13
ColeSingleton14917	337	XP_002267865	PREDICTED: glutamate synthase 1 [NADH], chloroplastic-like [Vitis vinifera] unnamed protein product [Vitis vinifera]	117	2e-24
ColeSingleton14918	383	XP_002510699	ubiquitin-protein ligase, putative [Ricinus communis] ubiquitin-protein ligase, putative [Ricinus communis]	141	3e-43
ColeSingleton14920	380	EOY07507	Ribonuclease II, putative isoform 1 [Theobroma cacao] Ribonuclease II, putative isoform 1 [Theobroma cacao]	102	5e-45
ColeSingleton14923	334	XP_004503817	PREDICTED: uncharacterized protein At4g14100-like [Cicer arietinum]	119	4e-25
ColeSingleton14926	409	CBI27142	unnamed protein product [Vitis vinifera]	193	1e-47
ColeSingleton14939	511	XP_004238094	PREDICTED: LOW QUALITY PROTEIN: calcium-transporting ATPase 1, chloroplastic-like [Solanum lycopersicum]	286	2e-75
ColeSingleton14942	358	EOY26651	Cyclin a2,3 [Theobroma cacao]	78.2	9e-20
ColeSingleton14948	215	NP_001242162	uncharacterized protein LOC100788550 precursor [Glycine max] unknown [Glycine max]	67	2e-09
ColeSingleton14951	146	EMJ23770	hypothetical protein PRUPE_ppa008416mg [Prunus persica]	87.4	1e-15
ColeSingleton14954	269	EMJ01396	hypothetical protein PRUPE_ppa016010mg [Prunus persica]	87.8	1e-15
ColeSingleton14955	311	EMJ01058	hypothetical protein PRUPE_ppa005707mg [Prunus persica]	131	1e-29
ColeSingleton14956	341	EPS69714	hypothetical protein M569_05050, partial [Genlisea aurea]	130	1e-28
ColeSingleton14957	373	XP_002317728	predicted protein [Populus trichocarpa] predicted protein [Populus trichocarpa]	177	8e-43
ColeSingleton14961	419	EPS66913	hypothetical protein M569_07863, partial [Genlisea aurea]	45.8	4e-10
ColeSingleton14963	500	CAN71465	hypothetical protein VITISV_038986 [Vitis vinifera]	115	4e-24
ColeSingleton14964	304	EMJ04411	hypothetical protein PRUPE_ppa000360mg [Prunus persica]	88.6	2e-23
ColeSingleton14968	471	AGB05602	sn-glycerol-3-phosphate acyltransferase [Camellia oleifera]	233	2e-59
ColeSingleton14969	486	XP_002281400	PREDICTED: probable peptide transporter At1g52190-like [Vitis vinifera]	127	9e-28
ColeSingleton14971	439	CCH50976	T4.15 [Malus x robusta]	64.7	1e-08
ColeSingleton14978	333	CAI11095	putative kinesin heavy chain [Cannabis sativa]	57	2e-06
ColeSingleton14979	108	EMJ28210	hypothetical protein PRUPE_ppa001275mg [Prunus persica]	66.6	3e-09
ColeSingleton14981	402	XP_004298855	PREDICTED: cation/H(+) antiporter 18-like [Fragaria vesca subsp. vesca]	135	1e-40
ColeSingleton14982	450	XP_002264879	PREDICTED: probable prefoldin subunit 1 [Vitis vinifera]	189	3e-46
ColeSingleton14990	300	EMJ19691	hypothetical protein PRUPE_ppa012156mg [Prunus persica]	117	2e-24
ColeSingleton14994	366	AAF79618	F5M15.26 [Arabidopsis thaliana]	99.8	8e-32
ColeSingleton14999	408	XP_002320270	predicted protein [Populus trichocarpa] predicted protein [Populus trichocarpa]	228	1e-58
ColeSingleton15000	490	CBI23009	unnamed protein product [Vitis vinifera]	139	6e-33
ColeSingleton15001	401	XP_002311786	SIN3 component, histone deacetylase complex [Populus trichocarpa] SIN3 component, histone deacetylase complex [Populus trichocarpa]	234	7e-60
ColeSingleton15007	266	EOY15679	Carbohydrate-binding protein, putative [Theobroma cacao]	60.5	2e-07
ColeSingleton15010	400	EPS63038	aspartate aminotransferase [Genlisea aurea]	124	7e-56
ColeSingleton15016	402	XP_002277555	PREDICTED: DNA-directed RNA polymerase I subunit RPA1-like [Vitis vinifera]	122	3e-26
ColeSingleton15018	168	EMJ11526	hypothetical protein PRUPE_ppa002100mg [Prunus persica]	81.6	8e-14
ColeSingleton15020	417	XP_002317908	predicted protein [Populus trichocarpa] predicted protein [Populus trichocarpa]	176	6e-56
ColeSingleton15024	537	XP_004303047	PREDICTED: uncharacterized protein LOC101312168 [Fragaria vesca subsp. vesca]	85.1	4e-25
ColeSingleton15025	332	EOX96964	Cation-chloride co-transporter 1 [Theobroma cacao]	163	4e-54
ColeSingleton15029	504	AGJ83729	gag-pol polyprotein, partial [Caragana korshinskii]	63.2	3e-08
ColeSingleton15032	423	CBI14956	unnamed protein product [Vitis vinifera]	97.1	2e-18
ColeSingleton15035	389	XP_002312750	predicted protein [Populus trichocarpa] predicted protein [Populus trichocarpa]	94.7	9e-18
ColeSingleton15036	403	XP_004235729	PREDICTED: early nodulin-like protein 1-like [Solanum lycopersicum]	62.8	4e-08
ColeSingleton15039	532	XP_003548891	PREDICTED: uncharacterized protein LOC100803738 [Glycine max]	95.1	7e-18
ColeSingleton15041	445	EMJ18289	hypothetical protein PRUPE_ppa000287mg [Prunus persica]	193	1e-47
ColeSingleton15042	201	AAO18731	cysteine protease [Gossypium hirsutum]	92.8	3e-17
ColeSingleton15045	493	EOY25055	Phosphoinositide 4-kinase gamma 4, gamma 4,ubdk gamma 4,pi4k gamma 4 [Theobroma cacao]	201	7e-50
ColeSingleton15048	257	XP_004245411	PREDICTED: uncharacterized protein LOC101257991 [Solanum lycopersicum]	102	3e-20
ColeSingleton15051	441	XP_003553307	PREDICTED: lysosomal alpha-mannosidase-like [Glycine max]	44.7	2e-06
ColeSingleton15057	473	XP_004292068	PREDICTED: uncharacterized protein LOC101313093 [Fragaria vesca subsp. vesca]	57.8	1e-06
ColeSingleton15062	200	EMJ01593	hypothetical protein PRUPE_ppa010835mg [Prunus persica]	95.5	3e-20
ColeSingleton15063	272	EOX93902	DNA binding protein, putative isoform 2 [Theobroma cacao]	92.4	4e-17
ColeSingleton15068	203	EOY30039	Ferredoxin-related [Theobroma cacao]	80.1	2e-13
ColeSingleton15071	451	CBI36172	unnamed protein product [Vitis vinifera]	92.4	5e-17
ColeSingleton15073	201	EPS72989	hypothetical protein M569_01766, partial [Genlisea aurea]	56.6	3e-06
ColeSingleton15076	446	XP_002317996	predicted protein [Populus trichocarpa] predicted protein [Populus trichocarpa]	119	2e-40
ColeSingleton15078	364	EOY25146	Trehalose phosphatase/synthase 5 isoform 3, partial [Theobroma cacao]	203	2e-50
ColeSingleton15083	433	XP_002521789	Disease resistance protein RFL1, putative [Ricinus communis] Disease resistance protein RFL1, putative [Ricinus communis]	57.8	1e-06
ColeSingleton15085	340	CBI26213	unnamed protein product [Vitis vinifera]	108	5e-22
ColeSingleton15086	454	XP_002275629	PREDICTED: transcription factor UNE10-like [Vitis vinifera]	207	2e-52
ColeSingleton15094	302	XP_004148008	PREDICTED: 60S ribosomal protein L7a-like [Cucumis sativus] PREDICTED: 60S ribosomal protein L7a-like [Cucumis sativus]	58.9	5e-07
ColeSingleton15095	487	ADD70008	WRKY transcription factor [Vitis pseudoreticulata]	175	1e-45
ColeSingleton15099	192	EMJ16049	hypothetical protein PRUPE_ppa006690mg [Prunus persica]	64.7	1e-08
ColeSingleton15101	464	EHY53935	lipase [Exophiala dermatitidis NIH/UT8656]	126	3e-27
ColeSingleton15106	509	CBI15707	unnamed protein product [Vitis vinifera]	153	2e-38
ColeSingleton15108	507	XP_002268933	PREDICTED: GTPase Der-like [Vitis vinifera]	205	5e-51
ColeSingleton15111	496	XP_002284667	PREDICTED: putative glycosyltransferase 3 [Vitis vinifera]	255	4e-66
ColeSingleton15113	187	EPS73110	hypothetical protein M569_01646, partial [Genlisea aurea]	67.4	2e-09
ColeSingleton15121	392	XP_004233116	PREDICTED: uncharacterized protein LOC101245912 [Solanum lycopersicum]	176	2e-42
ColeSingleton15126	471	XP_002510733	conserved hypothetical protein [Ricinus communis] conserved hypothetical protein [Ricinus communis]	78.6	7e-13
ColeSingleton15128	420	XP_004306496	PREDICTED: protein N-terminal asparagine amidohydrolase-like [Fragaria vesca subsp. vesca]	77.8	4e-14
ColeSingleton15133	254	XP_003548865	PREDICTED: beta-galactosidase 3-like [Glycine max]	139	3e-31
ColeSingleton15134	226	ABK92829	unknown [Populus trichocarpa]	55.5	6e-06
ColeSingleton15135	252	EOY25055	Phosphoinositide 4-kinase gamma 4, gamma 4,ubdk gamma 4,pi4k gamma 4 [Theobroma cacao]	91.3	1e-16
ColeSingleton15136	382	EMJ05077	hypothetical protein PRUPE_ppa005090mg [Prunus persica]	123	2e-26
ColeSingleton15138	423	XP_002523056	DNA mismatch repair protein pms2, putative [Ricinus communis] DNA mismatch repair protein pms2, putative [Ricinus communis]	216	3e-54
ColeSingleton15142	352	XP_002274443	PREDICTED: protein-ribulosamine 3-kinase, chloroplastic [Vitis vinifera] unnamed protein product [Vitis vinifera]	84.3	1e-14
ColeSingleton15143	392	CAN81808	hypothetical protein VITISV_013303 [Vitis vinifera]	163	2e-38
ColeSingleton15145	399	EMD63704	hypothetical protein COCSADRAFT_91616 [Bipolaris sorokiniana ND90Pr]	98.2	8e-22
ColeSingleton15147	310	EOY23353	Phosphatase-related [Theobroma cacao]	152	4e-35
ColeSingleton15149	477	XP_002534116	protein farnesyltransferase alpha subunit, putative [Ricinus communis] protein farnesyltransferase alpha subunit, putative [Ricinus communis]	136	2e-35
ColeSingleton15151	353	XP_002265561	PREDICTED: uncharacterized protein LOC100251663 [Vitis vinifera]	92.8	3e-17
ColeSingleton15152	425	XP_002305349	predicted protein [Populus trichocarpa] predicted protein [Populus trichocarpa]	254	7e-66
ColeSingleton15154	449	XP_002284059	PREDICTED: uncharacterized protein LOC100259497 [Vitis vinifera]	169	1e-52
ColeSingleton15155	488	XP_002274385	PREDICTED: uroporphyrinogen decarboxylase, chloroplastic-like [Vitis vinifera] unnamed protein product [Vitis vinifera]	193	2e-62
ColeSingleton15156	432	XP_002282702	PREDICTED: monoglyceride lipase [Vitis vinifera] unnamed protein product [Vitis vinifera]	89.7	3e-16
ColeSingleton15160	343	EOY07837	Uncharacterized protein TCM_022161 [Theobroma cacao]	108	8e-22
ColeSingleton15161	545	XP_003632691	PREDICTED: condensin complex subunit 1-like [Vitis vinifera]	186	5e-68
ColeSingleton15163	390	XP_003534286	PREDICTED: uncharacterized protein LOC100797009 [Glycine max]	205	4e-51
ColeSingleton15165	320	XP_004231953	PREDICTED: putative nuclear matrix constituent protein 1-like protein-like [Solanum lycopersicum]	97.8	1e-18
ColeSingleton15173	367	EOX91228	BEL1-like homeodomain protein 2 isoform 2 [Theobroma cacao]	64.3	1e-08
ColeSingleton15177	154	XP_002300825	predicted protein [Populus trichocarpa] predicted protein [Populus trichocarpa]	71.2	1e-10
ColeSingleton15179	378	XP_003632458	PREDICTED: uncharacterized protein LOC100248291 [Vitis vinifera]	221	8e-56
ColeSingleton15187	443	XP_003635668	PREDICTED: uncharacterized protein LOC100854178, partial [Vitis vinifera]	84.3	1e-14
ColeSingleton15190	293	XP_002274103	PREDICTED: scarecrow-like transcription factor PAT1-like [Vitis vinifera]	84.7	7e-19
ColeSingleton15191	138	EOY09151	Chromatin remodeling complex subunit isoform 5 [Theobroma cacao]	67.8	1e-09
ColeSingleton15194	506	XP_002283821	PREDICTED: uncharacterized protein LOC100256197 [Vitis vinifera] unnamed protein product [Vitis vinifera]	97.8	1e-31
ColeSingleton15195	227	XP_002263044	PREDICTED: U11/U12 small nuclear ribonucleoprotein 35 kDa protein [Vitis vinifera] unnamed protein product [Vitis vinifera]	151	8e-35
ColeSingleton15197	410	EOY22253	ATPase E1-E2 type family protein / haloacid dehalogenase-like hydrolase family protein isoform 3 [Theobroma cacao]	81.6	8e-14
ColeSingleton15198	293	ABM67700	polygalacturonase [Citrus sinensis]	84	2e-14
ColeSingleton15201	358	EOY10534	MIF4G domain and MA3 domain-containing protein isoform 6 [Theobroma cacao]	90.1	2e-16
ColeSingleton15204	409	CCH50976	T4.15 [Malus x robusta]	127	1e-27
ColeSingleton15207	185	CAC95126	gag-pol polyprotein [Populus deltoides]	80.1	2e-13
ColeSingleton15210	261	XP_002297953	predicted protein [Populus trichocarpa] predicted protein [Populus trichocarpa]	103	2e-20
ColeSingleton15214	447	XP_004230381	PREDICTED: uncharacterized protein LOC101245888 [Solanum lycopersicum]	133	2e-29
ColeSingleton15215	415	XP_004236016	PREDICTED: uncharacterized protein LOC101243975 isoform 1 [Solanum lycopersicum] PREDICTED: uncharacterized protein LOC101243975 isoform 2 [Solanum lycopersicum]	204	1e-50
ColeSingleton15216	509	AFK34967	unknown [Lotus japonicus]	80.9	6e-18
ColeSingleton15222	223	XP_004244011	PREDICTED: proteasome activator complex subunit 4-like [Solanum lycopersicum]	50.1	8e-08
ColeSingleton15228	469	EMJ16906	hypothetical protein PRUPE_ppa008901mg [Prunus persica]	144	1e-32
ColeSingleton15230	354	NP_567241	UDP-xylosyltransferase 2 [Arabidopsis thaliana] RecName: Full=Putative glycosyltransferase 2; Short=AtGT2 T14P8.23 [Arabidopsis thaliana] putative golgi glycosyltransferase [Arabidopsis thaliana] AT4g02500/T10P11_20 [Arabidopsis thaliana] putative glycosyltransferase [Arabidopsis thaliana] At4g02500 [Arabidopsis thaliana] UDP-xylosyltransferase 2 [Arabidopsis thaliana]	187	8e-46
ColeSingleton15231	491	XP_002309493	predicted protein [Populus trichocarpa] predicted protein [Populus trichocarpa]	120	1e-25
ColeSingleton15232	318	EOY21996	Myosin heavy chain-related, putative isoform 2 [Theobroma cacao]	110	2e-25
ColeSingleton15233	323	XP_003633701	PREDICTED: disease resistance protein At4g27190-like [Vitis vinifera]	68.6	7e-10
ColeSingleton15235	444	XP_002270833	PREDICTED: two-component response regulator ARR12-like [Vitis vinifera]	80.5	2e-13
ColeSingleton15236	203	CBI21466	unnamed protein product [Vitis vinifera]	71.2	1e-10
ColeSingleton15243	502	EMJ09542	hypothetical protein PRUPE_ppa002031mg [Prunus persica]	286	2e-75
ColeSingleton15249	148	XP_004248634	PREDICTED: seven transmembrane domain-containing tyrosine-protein kinase 1-like [Solanum lycopersicum]	88.2	9e-16
ColeSingleton15250	478	EMJ12598	hypothetical protein PRUPE_ppa006821mg [Prunus persica]	179	2e-56
ColeSingleton15251	496	XP_002532909	conserved hypothetical protein [Ricinus communis] conserved hypothetical protein [Ricinus communis]	196	2e-48
ColeSingleton15254	426	ACX54361	cyclin dependent kinase A [Cocos nucifera]	78.6	7e-13
ColeSingleton15259	426	XP_004173154	PREDICTED: probable sulfate transporter 3.5-like, partial [Cucumis sativus]	116	2e-24
ColeSingleton15262	529	XP_004239504	PREDICTED: uncharacterized protein LOC101256284 [Solanum lycopersicum]	60.8	1e-07
ColeSingleton15264	515	XP_004146767	PREDICTED: probable phosphatidylinositol 4-kinase type 2-beta At1g26270-like [Cucumis sativus] PREDICTED: probable phosphatidylinositol 4-kinase type 2-beta At1g26270-like [Cucumis sativus]	261	5e-77
ColeSingleton15272	421	CAN73077	hypothetical protein VITISV_032389 [Vitis vinifera]	45.1	1e-08
ColeSingleton15279	192	EOY30394	DWD hypersensitive to ABA 1 [Theobroma cacao]	107	1e-21
ColeSingleton15280	426	EOY25790	DNA-directed RNA polymerase III subunit rpc6, putative isoform 1 [Theobroma cacao] DNA-directed RNA polymerase III subunit rpc6, putative isoform 1 [Theobroma cacao]	96.3	1e-22
ColeSingleton15281	493	CAN71912	hypothetical protein VITISV_018965 [Vitis vinifera]	135	6e-30
ColeSingleton15282	486	XP_003847709	40S ribosomal protein S27 [Zymoseptoria tritici IPO323] hypothetical protein MYCGRDRAFT_64763 [Zymoseptoria tritici IPO323] hypothetical protein MYCFIDRAFT_210543 [Pseudocercospora fijiensis CIRAD86] 40S ribosomal protein S27 [Mycosphaerella populorum SO2202]	127	1e-36
ColeSingleton15290	297	XP_002278543	PREDICTED: protein vip1 [Vitis vinifera] unnamed protein product [Vitis vinifera]	99.4	4e-19
ColeSingleton15292	431	ACJ38665	cellulose synthase [Betula luminifera]	119	3e-25
ColeSingleton15293	451	YP_006291803	orf34 gene product (mitochondrion) [Daucus carota subsp. sativus] orf34 (mitochondrion) [Daucus carota subsp. sativus]	155	4e-58
ColeSingleton15295	484	Q41142	RecName: Full=Phospholipase D alpha 1; Short=PLD 1; AltName: Full=Choline phosphatase 1; AltName: Full=Phosphatidylcholine-hydrolyzing phospholipase D 1; Flags: Precursor phospholipase D [Ricinus communis]	290	1e-76
ColeSingleton15297	322	XP_004172849	PREDICTED: putative transcription elongation factor SPT5 homolog 1-like, partial [Cucumis sativus]	74.7	1e-11
ColeSingleton15299	472	XP_004292500	PREDICTED: putative laccase-9-like [Fragaria vesca subsp. vesca]	209	3e-52
ColeSingleton15302	336	BAG71125	glucosyltransferase [Phytolacca americana] glucosyltransferase [Phytolacca americana]	85.9	4e-15
ColeSingleton15304	356	CAN76638	hypothetical protein VITISV_027480 [Vitis vinifera]	109	3e-22
ColeSingleton15306	507	XP_004309844	PREDICTED: uncharacterized protein LOC101295192 [Fragaria vesca subsp. vesca]	64.3	3e-19
ColeSingleton15308	342	XP_002282476	PREDICTED: uncharacterized protein LOC100258707 [Vitis vinifera]	75.1	7e-12
ColeSingleton15312	239	XP_002274313	PREDICTED: cystathionine beta-lyase, chloroplastic [Vitis vinifera] unnamed protein product [Vitis vinifera]	155	4e-36
ColeSingleton15315	220	XP_002279076	PREDICTED: uncharacterized protein LOC100258473 [Vitis vinifera] unnamed protein product [Vitis vinifera]	85.5	5e-15
ColeSingleton15319	385	EMJ00045	hypothetical protein PRUPE_ppa014632mg [Prunus persica]	74.7	9e-20
ColeSingleton15320	407	AFK45399	unknown [Lotus japonicus]	128	1e-41
ColeSingleton15321	299	EMJ06737	hypothetical protein PRUPE_ppa008576mg [Prunus persica]	127	8e-32
ColeSingleton15323	502	EOY02868	Exocyst subunit exo70 family protein C2, putative [Theobroma cacao]	244	9e-63
ColeSingleton15324	218	ADO13869	RNA polymerase beta subunit [Helwingia sp. Peng et al. 17408]	65.9	4e-09
ColeSingleton15325	303	XP_004235713	PREDICTED: uncharacterized protein LOC101251365 [Solanum lycopersicum]	106	3e-21
ColeSingleton15326	452	XP_002272860	PREDICTED: pentatricopeptide repeat-containing protein At3g61360 [Vitis vinifera] unnamed protein product [Vitis vinifera]	160	4e-39
ColeSingleton15329	270	XP_002272551	PREDICTED: phosphatidylinositide phosphatase SAC1-like [Vitis vinifera]	88.2	8e-16
ColeSingleton15331	479	CBI18211	unnamed protein product [Vitis vinifera]	172	3e-41
ColeSingleton15335	524	AGJ83729	gag-pol polyprotein, partial [Caragana korshinskii]	145	3e-33
ColeSingleton15340	427	XP_004300673	PREDICTED: F-box/FBD/LRR-repeat protein At1g78750-like [Fragaria vesca subsp. vesca]	60.8	1e-07
ColeSingleton15343	427	CBI30275	unnamed protein product [Vitis vinifera]	124	1e-26
ColeSingleton15344	442	XP_004231331	PREDICTED: ATP-dependent RNA helicase Dhx29-like [Solanum lycopersicum]	142	5e-32
ColeSingleton15353	484	XP_002320058	predicted protein [Populus trichocarpa] predicted protein [Populus trichocarpa]	152	3e-35
ColeSingleton15354	397	XP_002262862	PREDICTED: vacuolar protein sorting-associated protein 35-like [Vitis vinifera] unnamed protein product [Vitis vinifera]	137	2e-45
ColeSingleton15355	385	XP_002280306	PREDICTED: filament-like plant protein 4-like [Vitis vinifera]	220	1e-55
ColeSingleton15356	473	XP_002278764	PREDICTED: probable receptor-like protein kinase At2g23200-like [Vitis vinifera]	118	1e-45
ColeSingleton15366	277	EOX96081	Phloem protein 2-A13 [Theobroma cacao]	129	3e-28
[truncated: 41,691 more rows]

## Sheet: KOG
Unigene ID	Hit protein	Code	KOG ID	Description	Score	E-value
ColeSingleton14	At4g18040	[J]	KOG1670	Translation, ribosomal structure and biogenesis	263	1e-79
ColeSingleton16	At5g44930	[G]	KOG1021	Carbohydrate transport and metabolism	232	3e-61
ColeSingleton16	At5g44930	[M]	KOG1021	Cell wall/membrane/envelope biogenesis	232	3e-61
ColeSingleton16	At5g44930	[W]	KOG1021	Extracellular structures	232	3e-61
ColeSingleton24	At1g32320	[T]	KOG0581	Signal transduction mechanisms	150	8e-37
ColeSingleton29	At1g56675	[R]	KOG0017	General function prediction only	63.9	3e-23
ColeSingleton33	At4g32150	[U]	KOG0859	Intracellular trafficking, secretion, and vesicular transport	192	3e-49
ColeSingleton40	At1g07180	[C]	KOG2495	Energy production and conversion	192	1e-49
ColeSingleton41	At3g12600	[T]	KOG2839	Signal transduction mechanisms	134	3e-32
ColeSingleton50	At3g52840	[G]	KOG0496	Carbohydrate transport and metabolism	56.6	1e-08
ColeSingleton53	At1g55860	[O]	KOG0939	Posttranslational modification, protein turnover, chaperones	187	1e-53
ColeSingleton53	At1g55860	[K]	KOG0939	Transcription	187	1e-53
ColeSingleton54	At3g01310	[Z]	KOG1057	Cytoskeleton	185	9e-48
ColeSingleton57	At2g35020	[M]	KOG2388	Cell wall/membrane/envelope biogenesis	120	9e-28
ColeSingleton58	At3g02470	[T]	KOG0788	Signal transduction mechanisms	107	8e-24
ColeSingleton59	At1g71220	[G]	KOG1879	Carbohydrate transport and metabolism	116	2e-26
ColeSingleton75	At1g60020	[R]	KOG0017	General function prediction only	58.5	5e-09
ColeSingleton78	At1g07180	[C]	KOG2495	Energy production and conversion	76.3	2e-14
ColeSingleton88	At1g44110	[D]	KOG0654	Cell cycle control, cell division, chromosome partitioning	99.8	2e-31
ColeSingleton104	At1g37200	[R]	KOG0017	General function prediction only	110	5e-25
ColeSingleton111	At4g37990	[Q]	KOG0023	Secondary metabolites biosynthesis, transport and catabolism	98.2	4e-21
ColeSingleton122	At5g09860	[Y]	KOG2491	Nuclear structure	48.1	4e-06
ColeSingleton123	At4g30990	[V]	KOG1823	Defense mechanisms	43.1	1e-05
ColeSingleton130	At5g06460	[O]	KOG2012	Posttranslational modification, protein turnover, chaperones	166	2e-53
ColeSingleton142	At5g56670	[J]	KOG0009	Translation, ribosomal structure and biogenesis	125	4e-29
ColeSingleton142	At5g56670	[O]	KOG0009	Posttranslational modification, protein turnover, chaperones	125	4e-29
ColeSingleton147	CE23779_1	[N]	KOG4229	Cell motility	48.1	8e-08
ColeSingleton149	At3g06350	[E]	KOG0692	Amino acid transport and metabolism	145	9e-37
ColeSingleton151	At1g21920	[R]	KOG0231	General function prediction only	121	3e-28
ColeSingleton154	At1g79080	[R]	KOG4197	General function prediction only	81.3	5e-16
ColeSingleton157	7293232	[L]	KOG0012	Replication, recombination and repair	62.4	4e-10
ColeSingleton160	At1g35647	[R]	KOG0017	General function prediction only	60.5	8e-10
ColeSingleton173	At2g46790	[K]	KOG1601	Transcription	78.6	1e-26
ColeSingleton179	At5g64560	[P]	KOG2662	Inorganic ion transport and metabolism	94	1e-23
ColeSingleton188	At1g14370	[T]	KOG1187	Signal transduction mechanisms	125	4e-29
ColeSingleton195	At4g12650	[U]	KOG1278	Intracellular trafficking, secretion, and vesicular transport	139	1e-33
ColeSingleton209	At1g63900	[O]	KOG1571	Posttranslational modification, protein turnover, chaperones	65.9	3e-11
ColeSingleton210	At3g16910	[I]	KOG1176	Lipid transport and metabolism	94.7	4e-20
ColeSingleton213	At2g41900	[R]	KOG1595	General function prediction only	55.5	3e-08
ColeSingleton222	At2g31270	[L]	KOG4762	Replication, recombination and repair	85.5	2e-17
ColeSingleton225	At3g22290	[U]	KOG2667	Intracellular trafficking, secretion, and vesicular transport	45.8	2e-10
ColeSingleton229	At4g32890	[K]	KOG1601	Transcription	71.2	5e-13
ColeSingleton234	At1g75000	[I]	KOG3071	Lipid transport and metabolism	154	7e-38
ColeSingleton239	At5g58060	[U]	KOG0861	Intracellular trafficking, secretion, and vesicular transport	70.1	1e-12
ColeSingleton240	At3g03300	[A]	KOG0701	RNA processing and modification	47.8	6e-06
ColeSingleton248	At3g53570	[T]	KOG0671	Signal transduction mechanisms	169	2e-42
ColeSingleton251	At3g44530	[D]	KOG0973	Cell cycle control, cell division, chromosome partitioning	143	1e-34
ColeSingleton251	At3g44530	[K]	KOG0973	Transcription	143	1e-34
ColeSingleton252	At5g47690	[D]	KOG1525	Cell cycle control, cell division, chromosome partitioning	68.6	1e-18
ColeSingleton253	At5g26751	[G]	KOG0658	Carbohydrate transport and metabolism	135	2e-32
ColeSingleton262	At5g17040	[G]	KOG1192	Carbohydrate transport and metabolism	67.8	5e-12
ColeSingleton262	At5g17040	[C]	KOG1192	Energy production and conversion	67.8	5e-12
ColeSingleton268	At5g23910	[Z]	KOG0239	Cytoskeleton	94.7	6e-20
ColeSingleton276	At5g42190	[O]	KOG1724	Posttranslational modification, protein turnover, chaperones	63.2	2e-10
ColeSingleton279	At5g51410	[A]	KOG0796	RNA processing and modification	129	2e-30
ColeSingleton280	At3g10360	[J]	KOG1488	Translation, ribosomal structure and biogenesis	142	2e-34
ColeSingleton283	At4g28200	[R]	KOG2396	General function prediction only	72.8	2e-13
ColeSingleton289	At2g42670	[S]	KOG4281	Function unknown	143	1e-34
ColeSingleton291	At2g44980	[K]	KOG0385	Transcription	83.2	3e-32
ColeSingleton295	At2g13940	[R]	KOG0017	General function prediction only	95.9	3e-20
ColeSingleton300	At3g57480	[R]	KOG3183	General function prediction only	62.4	2e-10
ColeSingleton303	At4g21800	[L]	KOG1532	Replication, recombination and repair	150	1e-36
ColeSingleton309	At2g47620	[B]	KOG1279	Chromatin structure and dynamics	127	9e-30
ColeSingleton312	At5g60390	[J]	KOG0052	Translation, ribosomal structure and biogenesis	107	8e-24
ColeSingleton315	At5g53090	[Q]	KOG1208	Secondary metabolites biosynthesis, transport and catabolism	103	9e-23
ColeSingleton318	At5g09360	[Q]	KOG1263	Secondary metabolites biosynthesis, transport and catabolism	75.5	3e-14
ColeSingleton322	At5g55190	[U]	KOG0096	Intracellular trafficking, secretion, and vesicular transport	48.1	4e-06
ColeSingleton324	At2g30200	[I]	KOG2926	Lipid transport and metabolism	86.7	1e-17
ColeSingleton327	At3g20870	[P]	KOG2474	Inorganic ion transport and metabolism	70.1	1e-12
ColeSingleton330	At3g44650	[R]	KOG1075	General function prediction only	58.2	4e-09
ColeSingleton338	At3g25500	[T]	KOG1922	Signal transduction mechanisms	276	1e-74
ColeSingleton338	At3g25500	[Z]	KOG1922	Cytoskeleton	276	1e-74
ColeSingleton341	At2g45590	[T]	KOG1187	Signal transduction mechanisms	103	7e-23
ColeSingleton344	At5g07740	[T]	KOG1922	Signal transduction mechanisms	148	2e-36
ColeSingleton344	At5g07740	[Z]	KOG1922	Cytoskeleton	148	2e-36
ColeSingleton346	At2g15590	[R]	KOG4197	General function prediction only	76.3	1e-14
ColeSingleton350	At1g51410	[V]	KOG1502	Defense mechanisms	57.4	7e-09
ColeSingleton366	At5g42740	[G]	KOG2446	Carbohydrate transport and metabolism	117	7e-27
ColeSingleton373	At1g55760	[D]	KOG1987	Cell cycle control, cell division, chromosome partitioning	246	1e-65
ColeSingleton373	At1g55760	[R]	KOG1987	General function prediction only	246	1e-65
ColeSingleton399	At3g03500	[L]	KOG3020	Replication, recombination and repair	55.5	3e-08
ColeSingleton410	At2g47290	[A]	KOG3322	RNA processing and modification	122	3e-28
ColeSingleton416	At1g08730	[Z]	KOG0160	Cytoskeleton	97.8	5e-21
ColeSingleton421	At5g03730	[T]	KOG0192	Signal transduction mechanisms	53.1	2e-07
ColeSingleton422	AtMi065	[R]	KOG0017	General function prediction only	144	1e-34
ColeSingleton428	At1g69640	[I]	KOG0874	Lipid transport and metabolism	48.9	9e-12
ColeSingleton430	At2g38060	[G]	KOG2532	Carbohydrate transport and metabolism	95.5	2e-20
ColeSingleton439	At1g53030	[O]	KOG3496	Posttranslational modification, protein turnover, chaperones	89.4	3e-18
ColeSingleton441	At2g25170	[R]	KOG0383	General function prediction only	52.4	2e-07
ColeSingleton446	At3g32400	[T]	KOG1922	Signal transduction mechanisms	51.6	4e-07
ColeSingleton446	At3g32400	[Z]	KOG1922	Cytoskeleton	51.6	4e-07
ColeSingleton448	At4g18230	[R]	KOG3339	General function prediction only	120	4e-33
ColeSingleton453	At1g42470	[I]	KOG1933	Lipid transport and metabolism	52.8	2e-07
ColeSingleton454	At3g44600	[O]	KOG0882	Posttranslational modification, protein turnover, chaperones	280	1e-75
ColeSingleton459	At1g27440	[G]	KOG1021	Carbohydrate transport and metabolism	149	9e-70
ColeSingleton459	At1g27440	[M]	KOG1021	Cell wall/membrane/envelope biogenesis	149	9e-70
ColeSingleton459	At1g27440	[W]	KOG1021	Extracellular structures	149	9e-70
ColeSingleton461	At1g13450	[K]	KOG4282	Transcription	118	3e-27
ColeSingleton463	At4g10580	[R]	KOG0017	General function prediction only	71.6	2e-27
ColeSingleton464	At2g32080	[K]	KOG3074	Transcription	47.4	7e-06
ColeSingleton465	At1g05810	[U]	KOG0087	Intracellular trafficking, secretion, and vesicular transport	128	1e-57
ColeSingleton466	At3g23870	[S]	KOG2922	Function unknown	196	8e-51
ColeSingleton467	At4g04180	[O]	KOG0730	Posttranslational modification, protein turnover, chaperones	235	2e-62
ColeSingleton469	At3g17205	[O]	KOG0942	Posttranslational modification, protein turnover, chaperones	94	9e-20
ColeSingleton470	At2g28070	[Q]	KOG0061	Secondary metabolites biosynthesis, transport and catabolism	95.5	4e-27
ColeSingleton480	At5g39740	[J]	KOG0875	Translation, ribosomal structure and biogenesis	91.3	4e-19
ColeSingleton483	At4g09710	[R]	KOG1075	General function prediction only	58.9	7e-15
ColeSingleton492	At3g60070	[G]	KOG4830	Carbohydrate transport and metabolism	128	5e-30
ColeSingleton498	At1g60940	[T]	KOG0583	Signal transduction mechanisms	89.7	1e-33
ColeSingleton504	At1g63220	[R]	KOG1030	General function prediction only	88.2	4e-18
ColeSingleton523	At5g15280	[R]	KOG4197	General function prediction only	105	3e-23
ColeSingleton525	At2g01910	[D]	KOG4302	Cell cycle control, cell division, chromosome partitioning	58.5	3e-09
ColeSingleton525	At2g01910	[Z]	KOG4302	Cytoskeleton	58.5	3e-09
ColeSingleton527	At5g19960	[R]	KOG0118	General function prediction only	51.6	2e-10
ColeSingleton528	Hs5453640	[S]	KOG4764	Function unknown	65.5	3e-11
ColeSingleton531	At1g78580	[G]	KOG1050	Carbohydrate transport and metabolism	237	6e-63
ColeSingleton532	At1g80670	[A]	KOG0647	RNA processing and modification	187	4e-48
ColeSingleton533	At3g46620	[O]	KOG0800	Posttranslational modification, protein turnover, chaperones	89.7	5e-23
ColeSingleton535	Hs7705365	[R]	KOG0110	General function prediction only	57	6e-14
ColeSingleton542	At2g13940	[R]	KOG0017	General function prediction only	36.6	8e-06
ColeSingleton571	At1g30820	[F]	KOG2387	Nucleotide transport and metabolism	223	1e-58
ColeSingleton578	At1g24140	[O]	KOG1565	Posttranslational modification, protein turnover, chaperones	69.7	1e-12
ColeSingleton578	At1g24140	[W]	KOG1565	Extracellular structures	69.7	1e-12
ColeSingleton584	At1g04850	[O]	KOG2699	Posttranslational modification, protein turnover, chaperones	46.2	3e-06
ColeSingleton587	At3g29360	[G]	KOG2666	Carbohydrate transport and metabolism	183	1e-60
ColeSingleton587	At3g29360	[T]	KOG2666	Signal transduction mechanisms	183	1e-60
ColeSingleton590	At2g30800	[A]	KOG0920	RNA processing and modification	73.9	7e-14
ColeSingleton598	At3g48740	[R]	KOG1623	General function prediction only	56.2	2e-08
ColeSingleton599	At1g51440	[I]	KOG4569	Lipid transport and metabolism	53.1	1e-07
ColeSingleton602	At4g17450	[R]	KOG0017	General function prediction only	95.9	3e-21
ColeSingleton613	At2g43800	[T]	KOG1922	Signal transduction mechanisms	76.6	2e-14
ColeSingleton613	At2g43800	[Z]	KOG1922	Cytoskeleton	76.6	2e-14
ColeSingleton619	At2g17900	[B]	KOG2084	Chromatin structure and dynamics	113	7e-44
ColeSingleton624	At3g23150	[T]	KOG0519	Signal transduction mechanisms	85.5	2e-17
ColeSingleton625	At2g10780	[R]	KOG0017	General function prediction only	165	2e-47
ColeSingleton627	At5g46290	[I]	KOG1394	Lipid transport and metabolism	189	1e-48
ColeSingleton627	At5g46290	[Q]	KOG1394	Secondary metabolites biosynthesis, transport and catabolism	189	1e-48
ColeSingleton633	At3g45890	[S]	KOG4249	Function unknown	67.8	5e-12
ColeSingleton638	At1g21370	[S]	KOG4533	Function unknown	252	3e-67
ColeSingleton639	At4g02960	[R]	KOG0017	General function prediction only	75.9	2e-14
ColeSingleton644	At2g10780	[R]	KOG0017	General function prediction only	50.4	2e-06
ColeSingleton649	At1g48760	[U]	KOG1059	Intracellular trafficking, secretion, and vesicular transport	53.1	2e-07
ColeSingleton654	At2g40650	[S]	KOG2889	Function unknown	81.6	3e-16
ColeSingleton655	At3g11540	[G]	KOG4626	Carbohydrate transport and metabolism	74.7	4e-14
ColeSingleton655	At3g11540	[O]	KOG4626	Posttranslational modification, protein turnover, chaperones	74.7	4e-14
ColeSingleton655	At3g11540	[T]	KOG4626	Signal transduction mechanisms	74.7	4e-14
ColeSingleton665	At1g31360	[R]	KOG0353	General function prediction only	62.4	2e-10
ColeSingleton674	At1g53820	[O]	KOG0800	Posttranslational modification, protein turnover, chaperones	69.7	1e-12
ColeSingleton685	At2g47730	[O]	KOG0867	Posttranslational modification, protein turnover, chaperones	99.4	3e-21
ColeSingleton689	At1g26990	[R]	KOG0017	General function prediction only	69.3	7e-18
ColeSingleton705	At4g16190	[O]	KOG1542	Posttranslational modification, protein turnover, chaperones	72	3e-13
ColeSingleton710	At3g07160	[M]	KOG0916	Cell wall/membrane/envelope biogenesis	64.7	4e-11
ColeSingleton712	At1g07710	[R]	KOG0504	General function prediction only	213	1e-55
ColeSingleton714	At2g01650	[O]	KOG2699	Posttranslational modification, protein turnover, chaperones	82.8	2e-16
ColeSingleton715	At5g02170	[E]	KOG1303	Amino acid transport and metabolism	95.1	3e-36
ColeSingleton719	At3g15020	[C]	KOG1494	Energy production and conversion	68.2	4e-12
ColeSingleton720	At4g20850	[O]	KOG1114	Posttranslational modification, protein turnover, chaperones	82.4	8e-23
ColeSingleton722	At5g41370	[K]	KOG1123	Transcription	266	8e-72
ColeSingleton722	At5g41370	[L]	KOG1123	Replication, recombination and repair	266	8e-72
ColeSingleton745	At5g53940	[R]	KOG3399	General function prediction only	66.6	1e-11
ColeSingleton750	At1g10160	[R]	KOG1075	General function prediction only	71.2	6e-13
ColeSingleton754	At2g34660	[Q]	KOG0054	Secondary metabolites biosynthesis, transport and catabolism	109	2e-24
ColeSingleton755	At1g68200	[R]	KOG1677	General function prediction only	160	4e-46
ColeSingleton763	At1g11160	[D]	KOG0267	Cell cycle control, cell division, chromosome partitioning	158	3e-39
ColeSingleton764	At5g50780	[D]	KOG1845	Cell cycle control, cell division, chromosome partitioning	82.8	2e-16
ColeSingleton765	At1g68570	[E]	KOG1237	Amino acid transport and metabolism	69.7	3e-12
ColeSingleton768	At1g19650	[I]	KOG1471	Lipid transport and metabolism	64.3	1e-23
ColeSingleton771	At2g37770	[R]	KOG1577	General function prediction only	92.8	2e-19
ColeSingleton780	At3g58660	[S]	KOG1685	Function unknown	161	6e-40
ColeSingleton787	At2g43750	[E]	KOG1252	Amino acid transport and metabolism	140	5e-34
ColeSingleton788	At4g08980	[R]	KOG1947	General function prediction only	147	1e-35
ColeSingleton798	At5g41610	[P]	KOG1650	Inorganic ion transport and metabolism	219	1e-57
ColeSingleton799	At1g15740	[R]	KOG1947	General function prediction only	47	9e-06
ColeSingleton801	At1g55620	[P]	KOG0475	Inorganic ion transport and metabolism	149	3e-36
ColeSingleton807	At2g11000	[R]	KOG2343	General function prediction only	99.8	1e-21
ColeSingleton808	At4g08980	[R]	KOG1947	General function prediction only	157	4e-39
ColeSingleton809	At2g41500	[A]	KOG0272	RNA processing and modification	160	3e-70
ColeSingleton813	At4g25590	[Z]	KOG1735	Cytoskeleton	50.1	1e-06
ColeSingleton817	At3g02090	[O]	KOG0960	Posttranslational modification, protein turnover, chaperones	111	4e-25
ColeSingleton818	At5g58270	[U]	KOG0057	Intracellular trafficking, secretion, and vesicular transport	209	1e-54
ColeSingleton820	At5g58870	[O]	KOG0731	Posttranslational modification, protein turnover, chaperones	89	3e-18
ColeSingleton822	At5g45100	[O]	KOG1100	Posttranslational modification, protein turnover, chaperones	107	1e-31
ColeSingleton825	At5g35790	[G]	KOG0563	Carbohydrate transport and metabolism	58.5	3e-09
ColeSingleton830	At5g37830	[E]	KOG1939	Amino acid transport and metabolism	296	1e-80
ColeSingleton831	YDR047w	[H]	KOG2872	Coenzyme transport and metabolism	171	3e-43
ColeSingleton840	SPBC9B6.08	[U]	KOG4031	Intracellular trafficking, secretion, and vesicular transport	74.3	1e-13
ColeSingleton842	At5g20490	[Z]	KOG0160	Cytoskeleton	212	1e-55
ColeSingleton848	At5g62760	[V]	KOG2400	Defense mechanisms	49.7	1e-06
ColeSingleton855	At4g01840	[P]	KOG1418	Inorganic ion transport and metabolism	121	5e-29
ColeSingleton856	At1g47740	[S]	KOG0324	Function unknown	119	3e-27
ColeSingleton859	At4g18880	[K]	KOG0627	Transcription	60.8	1e-09
ColeSingleton862	At3g48820	[G]	KOG2692	Carbohydrate transport and metabolism	229	1e-60
ColeSingleton872	At1g24030	[T]	KOG1187	Signal transduction mechanisms	130	6e-31
ColeSingleton874	At5g11200	[A]	KOG0329	RNA processing and modification	156	1e-38
ColeSingleton878	At3g22845	[U]	KOG1692	Intracellular trafficking, secretion, and vesicular transport	58.9	3e-09
ColeSingleton880	At5g54650	[T]	KOG1922	Signal transduction mechanisms	90.9	5e-22
ColeSingleton880	At5g54650	[Z]	KOG1922	Cytoskeleton	90.9	5e-22
ColeSingleton890	At2g16000	[R]	KOG0017	General function prediction only	69.3	2e-12
ColeSingleton891	At1g79520	[P]	KOG1485	Inorganic ion transport and metabolism	105	7e-24
ColeSingleton900	At4g24470	[K]	KOG1601	Transcription	79.7	2e-15
ColeSingleton901	At5g50180	[T]	KOG0192	Signal transduction mechanisms	75.5	3e-14
ColeSingleton912	At4g17730	[U]	KOG0811	Intracellular trafficking, secretion, and vesicular transport	128	4e-30
ColeSingleton913	At5g13580	[Q]	KOG0061	Secondary metabolites biosynthesis, transport and catabolism	99.4	2e-21
ColeSingleton915	At2g21410	[C]	KOG2189	Energy production and conversion	84.3	1e-16
ColeSingleton928	At5g03640	[R]	KOG0610	General function prediction only	80.5	1e-15
ColeSingleton929	At1g22040	[R]	KOG1072	General function prediction only	89	2e-18
ColeSingleton930	CE23852	[C]	KOG2450	Energy production and conversion	75.5	2e-14
ColeSingleton937	At3g03000	[T]	KOG0027	Signal transduction mechanisms	73.9	4e-26
ColeSingleton946	At1g06890	[G]	KOG1441	Carbohydrate transport and metabolism	106	3e-37
ColeSingleton946	At1g06890	[E]	KOG1441	Amino acid transport and metabolism	106	3e-37
ColeSingleton949	At3g47160	[O]	KOG1039	Posttranslational modification, protein turnover, chaperones	49.3	1e-14
ColeSingleton953	At5g27820	[O]	KOG1870	Posttranslational modification, protein turnover, chaperones	115	1e-27
ColeSingleton955	At5g03680	[K]	KOG4282	Transcription	154	1e-37
ColeSingleton959	At1g45616	[R]	KOG0619	General function prediction only	116	1e-26
ColeSingleton963	At3g46220	[S]	KOG2235	Function unknown	170	6e-43
ColeSingleton965	At4g31230	[T]	KOG1187	Signal transduction mechanisms	53.9	8e-08
ColeSingleton969	At3g12520	[P]	KOG0236	Inorganic ion transport and metabolism	54.7	3e-14
ColeSingleton973	At4g08790	[E]	KOG0807	Amino acid transport and metabolism	204	9e-53
ColeSingleton976	At5g24260	[O]	KOG2281	Posttranslational modification, protein turnover, chaperones	169	1e-42
ColeSingleton989	At1g75450	[C]	KOG1231	Energy production and conversion	110	6e-32
ColeSingleton991	At5g11310	[R]	KOG4197	General function prediction only	57.4	3e-11
ColeSingleton992	At3g02260	[T]	KOG1776	Signal transduction mechanisms	196	2e-50
ColeSingleton993	At1g79970_2	[U]	KOG4697	Intracellular trafficking, secretion, and vesicular transport	102	1e-22
ColeSingleton998	At1g76690	[C]	KOG0134	Energy production and conversion	157	2e-49
ColeSingleton998	At1g76690	[R]	KOG0134	General function prediction only	157	2e-49
ColeSingleton999	At1g32450	[E]	KOG1237	Amino acid transport and metabolism	149	2e-36
ColeSingleton1010	At3g55730	[K]	KOG0048	Transcription	127	9e-30
ColeSingleton1026	At3g16910	[I]	KOG1176	Lipid transport and metabolism	103	9e-44
ColeSingleton1033	At3g55530	[O]	KOG0800	Posttranslational modification, protein turnover, chaperones	64.3	3e-15
ColeSingleton1036	At5g47690	[D]	KOG1525	Cell cycle control, cell division, chromosome partitioning	94.7	1e-25
ColeSingleton1048	Hs7705433	[J]	KOG3677	Translation, ribosomal structure and biogenesis	56.6	2e-08
ColeSingleton1048	Hs7705433	[K]	KOG3677	Transcription	56.6	2e-08
ColeSingleton1055	At2g27760	[J]	KOG1384	Translation, ribosomal structure and biogenesis	71.2	5e-13
ColeSingleton1068	At4g22930	[F]	KOG2902	Nucleotide transport and metabolism	261	4e-70
ColeSingleton1082	CE29568	[T]	KOG3671	Signal transduction mechanisms	28.9	4e-06
ColeSingleton1082	CE29568	[Z]	KOG3671	Cytoskeleton	28.9	4e-06
ColeSingleton1083	At4g38890	[R]	KOG2333	General function prediction only	106	1e-23
ColeSingleton1093	At1g77800	[R]	KOG0954	General function prediction only	52.8	2e-07
ColeSingleton1095	At5g09390	[R]	KOG2950	General function prediction only	47	3e-09
ColeSingleton1096	At1g76630	[A]	KOG1127	RNA processing and modification	62.8	2e-10
ColeSingleton1101	At3g63250	[E]	KOG1579	Amino acid transport and metabolism	196	1e-53
ColeSingleton1104	At3g51840	[E]	KOG0138	Amino acid transport and metabolism	48.1	4e-06
ColeSingleton1107	At1g60070	[U]	KOG1062	Intracellular trafficking, secretion, and vesicular transport	154	4e-50
ColeSingleton1113	At3g03600	[J]	KOG0832	Translation, ribosomal structure and biogenesis	177	7e-45
ColeSingleton1133	At5g43900	[Z]	KOG0160	Cytoskeleton	197	9e-51
ColeSingleton1135	At5g23810	[E]	KOG1303	Amino acid transport and metabolism	82.8	2e-16
ColeSingleton1138	At5g13000	[M]	KOG0916	Cell wall/membrane/envelope biogenesis	152	2e-39
ColeSingleton1144	At3g54180	[R]	KOG0594	General function prediction only	155	5e-38
ColeSingleton1152	Hs4502599	[Q]	KOG1208	Secondary metabolites biosynthesis, transport and catabolism	84	1e-16
ColeSingleton1155	At3g61480	[R]	KOG2006	General function prediction only	67.4	6e-23
ColeSingleton1158	At3g16060	[Z]	KOG0246	Cytoskeleton	194	1e-54
ColeSingleton1162	At2g45950	[O]	KOG1724	Posttranslational modification, protein turnover, chaperones	110	1e-24
ColeSingleton1167	At5g01720	[R]	KOG1947	General function prediction only	70.1	1e-12
ColeSingleton1174	At5g16260	[K]	KOG1548	Transcription	121	2e-30
ColeSingleton1175	At2g15690_2	[R]	KOG4197	General function prediction only	114	5e-34
ColeSingleton1178	At1g01960	[U]	KOG0929	Intracellular trafficking, secretion, and vesicular transport	191	1e-61
ColeSingleton1186	At1g71697	[M]	KOG2686	Cell wall/membrane/envelope biogenesis	54.3	7e-08
ColeSingleton1187	At4g38890	[R]	KOG2333	General function prediction only	89.4	2e-18
ColeSingleton1198	At5g65290	[R]	KOG2296	General function prediction only	111	3e-32
ColeSingleton1201	At5g06220	[S]	KOG1043	Function unknown	183	1e-46
ColeSingleton1205	At3g43630	[S]	KOG4473	Function unknown	114	5e-26
ColeSingleton1207	At3g45270	[L]	KOG1121	Replication, recombination and repair	47.8	9e-06
ColeSingleton1220	At5g53470	[I]	KOG0817	Lipid transport and metabolism	130	9e-31
ColeSingleton1232	At5g15450	[O]	KOG1051	Posttranslational modification, protein turnover, chaperones	179	2e-45
ColeSingleton1233	At2g25290	[O]	KOG4151	Posttranslational modification, protein turnover, chaperones	132	3e-31
ColeSingleton1233	At2g25290	[D]	KOG4151	Cell cycle control, cell division, chromosome partitioning	132	3e-31
ColeSingleton1233	At2g25290	[R]	KOG4151	General function prediction only	132	3e-31
ColeSingleton1240	At3g06190	[D]	KOG1987	Cell cycle control, cell division, chromosome partitioning	183	1e-46
ColeSingleton1240	At3g06190	[R]	KOG1987	General function prediction only	183	1e-46
ColeSingleton1243	At4g13430	[E]	KOG0454	Amino acid transport and metabolism	61.6	3e-12
ColeSingleton1244	At2g43650	[B]	KOG3118	Chromatin structure and dynamics	66.2	2e-13
ColeSingleton1246	At3g22320	[K]	KOG3218	Transcription	132	2e-31
ColeSingleton1255	At1g37110	[R]	KOG0017	General function prediction only	107	5e-24
ColeSingleton1256	At4g32730	[K]	KOG0048	Transcription	71.2	5e-13
ColeSingleton1264	At2g33730	[A]	KOG0333	RNA processing and modification	298	5e-81
ColeSingleton1271	At3g08500	[K]	KOG0048	Transcription	78.2	4e-15
ColeSingleton1273	At2g25730	[R]	KOG1811	General function prediction only	142	2e-39
ColeSingleton1278	At4g14220	[O]	KOG0800	Posttranslational modification, protein turnover, chaperones	48.9	4e-06
ColeSingleton1283	At1g49350	[R]	KOG3009	General function prediction only	97.4	9e-21
ColeSingleton1295	At1g08600	[K]	KOG1015	Transcription	70.9	6e-13
ColeSingleton1299	At4g16830	[R]	KOG2945	General function prediction only	57.4	1e-08
ColeSingleton1311	At5g01850	[T]	KOG0192	Signal transduction mechanisms	220	5e-66
ColeSingleton1315	At3g51830	[I]	KOG1889	Lipid transport and metabolism	51.6	4e-07
ColeSingleton1316	At1g68600	[R]	KOG4711	General function prediction only	215	5e-59
ColeSingleton1317	At5g23630	[P]	KOG0209	Inorganic ion transport and metabolism	118	5e-31
ColeSingleton1320	Hs22064517	[Q]	KOG0156	Secondary metabolites biosynthesis, transport and catabolism	57.4	1e-08
ColeSingleton1325	At1g63220	[R]	KOG1030	General function prediction only	56.6	2e-08
ColeSingleton1326	At2g25320	[D]	KOG1987	Cell cycle control, cell division, chromosome partitioning	81.3	4e-16
ColeSingleton1326	At2g25320	[R]	KOG1987	General function prediction only	81.3	4e-16
ColeSingleton1329	At3g46220	[S]	KOG2235	Function unknown	77.8	3e-21
ColeSingleton1334	At1g22860	[U]	KOG2063	Intracellular trafficking, secretion, and vesicular transport	152	1e-37
ColeSingleton1344	At1g07380	[T]	KOG2232	Signal transduction mechanisms	84	1e-32
ColeSingleton1345	At4g25390	[T]	KOG1187	Signal transduction mechanisms	79.7	2e-19
ColeSingleton1352	At2g13370	[K]	KOG0384	Transcription	131	3e-34
ColeSingleton1355	7296176	[T]	KOG4297	Signal transduction mechanisms	48.9	2e-06
ColeSingleton1355	7296176	[V]	KOG4297	Defense mechanisms	48.9	2e-06
ColeSingleton1357	At5g45420	[O]	KOG0724	Posttranslational modification, protein turnover, chaperones	60.5	1e-09
ColeSingleton1363	At4g14340	[T]	KOG1164	Signal transduction mechanisms	78.2	4e-15
ColeSingleton1364	At2g30360	[T]	KOG0583	Signal transduction mechanisms	207	1e-66
ColeSingleton1367	At2g38770	[L]	KOG1806	Replication, recombination and repair	103	3e-29
ColeSingleton1369	At4g32350	[Z]	KOG2027	Cytoskeleton	55.5	3e-08
ColeSingleton1377	At3g59710	[Q]	KOG1208	Secondary metabolites biosynthesis, transport and catabolism	166	1e-41
ColeSingleton1383	At3g06470	[I]	KOG3071	Lipid transport and metabolism	87.8	5e-18
ColeSingleton1398	At2g31660	[Y]	KOG1991	Nuclear structure	218	7e-61
ColeSingleton1398	At2g31660	[U]	KOG1991	Intracellular trafficking, secretion, and vesicular transport	218	7e-61
ColeSingleton1400	At5g01180	[E]	KOG1237	Amino acid transport and metabolism	100	5e-22
ColeSingleton1410	At2g41620	[D]	KOG2168	Cell cycle control, cell division, chromosome partitioning	83.6	1e-16
ColeSingleton1418	At5g58900	[O]	KOG0724	Posttranslational modification, protein turnover, chaperones	214	4e-56
ColeSingleton1419	At3g58670	[S]	KOG4281	Function unknown	162	2e-40
ColeSingleton1420	At5g42950	[R]	KOG1862	General function prediction only	75.1	7e-14
ColeSingleton1423	At5g26707	[J]	KOG1147	Translation, ribosomal structure and biogenesis	179	3e-51
ColeSingleton1424	At1g18370	[Z]	KOG0242	Cytoskeleton	65.9	8e-18
ColeSingleton1438	At1g80370	[D]	KOG0654	Cell cycle control, cell division, chromosome partitioning	117	3e-34
ColeSingleton1439	At5g65400	[E]	KOG2551	Amino acid transport and metabolism	52.8	2e-07
ColeSingleton1446	At2g15230	[I]	KOG2624	Lipid transport and metabolism	112	4e-25
ColeSingleton1450	At2g06210	[P]	KOG2002	Inorganic ion transport and metabolism	90.9	6e-19
ColeSingleton1459	At5g50850	[C]	KOG0524	Energy production and conversion	134	1e-50
ColeSingleton1462	At3g19090	[R]	KOG1855	General function prediction only	174	1e-43
ColeSingleton1465	At1g13180	[Z]	KOG0678	Cytoskeleton	148	5e-36
ColeSingleton1483	At2g31060	[J]	KOG0462	Translation, ribosomal structure and biogenesis	224	3e-59
ColeSingleton1487	At1g49730	[T]	KOG1187	Signal transduction mechanisms	50.1	1e-06
ColeSingleton1488	At1g79810	[O]	KOG2879	Posttranslational modification, protein turnover, chaperones	59.3	2e-09
ColeSingleton1495	At3g19640	[P]	KOG2662	Inorganic ion transport and metabolism	51.6	4e-07
ColeSingleton1496	At3g11130	[U]	KOG0985	Intracellular trafficking, secretion, and vesicular transport	94	7e-20
ColeSingleton1501	At3g16170	[I]	KOG1176	Lipid transport and metabolism	96.3	1e-20
ColeSingleton1508	At1g60600	[S]	KOG4581	Function unknown	114	2e-38
ColeSingleton1524	At1g61850	[I]	KOG4231	Lipid transport and metabolism	97.4	6e-21
ColeSingleton1527	At4g19780	[R]	KOG0017	General function prediction only	86.7	2e-26
ColeSingleton1529	At2g26230	[Q]	KOG1599	Secondary metabolites biosynthesis, transport and catabolism	191	5e-49
ColeSingleton1532	At5g17920	[E]	KOG2263	Amino acid transport and metabolism	228	4e-60
ColeSingleton1534	Hs14149665	[K]	KOG1874	Transcription	63.2	1e-10
ColeSingleton1538	At1g28060	[A]	KOG2769	RNA processing and modification	108	3e-24
ColeSingleton1543	At1g67280	[G]	KOG2943	Carbohydrate transport and metabolism	121	7e-28
ColeSingleton1544	At4g24050	[Q]	KOG1208	Secondary metabolites biosynthesis, transport and catabolism	238	5e-63
ColeSingleton1550	At4g04470	[R]	KOG1944	General function prediction only	64.3	6e-11
ColeSingleton1551	At2g16780	[B]	KOG0264	Chromatin structure and dynamics	91.7	8e-19
ColeSingleton1552	At2g42910	[F]	KOG1448	Nucleotide transport and metabolism	65.1	3e-11
ColeSingleton1552	At2g42910	[E]	KOG1448	Amino acid transport and metabolism	65.1	3e-11
ColeSingleton1553	At2g07420	[R]	KOG0017	General function prediction only	54.3	6e-08
ColeSingleton1554	At3g53570	[T]	KOG0671	Signal transduction mechanisms	95.5	4e-25
ColeSingleton1561	At3g20170	[U]	KOG4224	Intracellular trafficking, secretion, and vesicular transport	80.1	2e-15
ColeSingleton1564	At3g45830	[K]	KOG1927	Transcription	48.1	9e-06
ColeSingleton1568	At3g29320	[G]	KOG2099	Carbohydrate transport and metabolism	124	9e-29
ColeSingleton1571	At4g10830	[R]	KOG1075	General function prediction only	82.8	2e-16
ColeSingleton1573	At3g04120	[G]	KOG0657	Carbohydrate transport and metabolism	116	2e-26
ColeSingleton1576	At5g15400	[O]	KOG2042	Posttranslational modification, protein turnover, chaperones	100	6e-22
ColeSingleton1584	YBL099w	[C]	KOG1353	Energy production and conversion	111	7e-25
ColeSingleton1586	At5g61530	[T]	KOG4270	Signal transduction mechanisms	113	1e-25
ColeSingleton1596	At3g09440	[O]	KOG0101	Posttranslational modification, protein turnover, chaperones	92.8	1e-34
ColeSingleton1606	At1g36035	[R]	KOG0017	General function prediction only	171	4e-43
ColeSingleton1615	At3g10810	[O]	KOG0800	Posttranslational modification, protein turnover, chaperones	49.3	2e-06
ColeSingleton1618	At1g56075	[J]	KOG0469	Translation, ribosomal structure and biogenesis	92	3e-19
ColeSingleton1619	At3g28345	[Q]	KOG0055	Secondary metabolites biosynthesis, transport and catabolism	103	6e-23
ColeSingleton1621	At2g27690	[Q]	KOG0157	Secondary metabolites biosynthesis, transport and catabolism	181	4e-51
ColeSingleton1621	At2g27690	[I]	KOG0157	Lipid transport and metabolism	181	4e-51
ColeSingleton1623	At3g20720	[S]	KOG2955	Function unknown	48.9	4e-06
ColeSingleton1643	At4g11600	[O]	KOG1651	Posttranslational modification, protein turnover, chaperones	87.8	6e-18
ColeSingleton1654	At5g40480	[Y]	KOG1833	Nuclear structure	74.7	4e-14
ColeSingleton1654	At5g40480	[U]	KOG1833	Intracellular trafficking, secretion, and vesicular transport	74.7	4e-14
ColeSingleton1664	At1g12360	[U]	KOG1300	Intracellular trafficking, secretion, and vesicular transport	48.5	3e-06
ColeSingleton1667	At5g01500	[C]	KOG0752	Energy production and conversion	265	4e-71
ColeSingleton1679	At5g07990	[Q]	KOG0156	Secondary metabolites biosynthesis, transport and catabolism	84.7	8e-17
ColeSingleton1685	At5g13050	[H]	KOG3093	Coenzyme transport and metabolism	65.5	5e-11
ColeSingleton1689	At1g61030	[D]	KOG2152	Cell cycle control, cell division, chromosome partitioning	106	1e-23
ColeSingleton1690	At5g02790	[O]	KOG0406	Posttranslational modification, protein turnover, chaperones	54.3	6e-08
ColeSingleton1695	At5g47790	[R]	KOG1880	General function prediction only	176	1e-44
ColeSingleton1701	At3g29400	[U]	KOG2344	Intracellular trafficking, secretion, and vesicular transport	75.9	2e-14
ColeSingleton1708	At1g10350	[O]	KOG0714	Posttranslational modification, protein turnover, chaperones	135	3e-32
ColeSingleton1712	Hs7662238	[B]	KOG2416	Chromatin structure and dynamics	57.4	7e-09
ColeSingleton1713	At2g35920	[A]	KOG0920	RNA processing and modification	130	2e-37
ColeSingleton1722	At1g20780	[S]	KOG0167	Function unknown	37.4	5e-07
ColeSingleton1726	At4g15180	[B]	KOG1080	Chromatin structure and dynamics	76.3	1e-14
ColeSingleton1726	At4g15180	[K]	KOG1080	Transcription	76.3	1e-14
ColeSingleton1727	At2g17880	[O]	KOG0712	Posttranslational modification, protein turnover, chaperones	62.4	1e-14
ColeSingleton1749	At2g06030	[R]	KOG1947	General function prediction only	115	2e-26
ColeSingleton1755	At1g67140	[S]	KOG1822	Function unknown	79	2e-15
ColeSingleton1758	At1g09620	[J]	KOG0437	Translation, ribosomal structure and biogenesis	131	3e-31
ColeSingleton1764	At3g18040	[T]	KOG0660	Signal transduction mechanisms	50.4	2e-07
ColeSingleton1780	At5g25430	[P]	KOG1172	Inorganic ion transport and metabolism	137	1e-38
ColeSingleton1784	At2g36960	[K]	KOG4468	Transcription	56.2	2e-08
ColeSingleton1786	At1g36370	[E]	KOG2467	Amino acid transport and metabolism	83.2	5e-26
ColeSingleton1788	At4g11920	[D]	KOG0305	Cell cycle control, cell division, chromosome partitioning	210	1e-54
ColeSingleton1788	At4g11920	[O]	KOG0305	Posttranslational modification, protein turnover, chaperones	210	1e-54
ColeSingleton1790	At3g21220	[T]	KOG0581	Signal transduction mechanisms	66.6	2e-11
ColeSingleton1795	At3g27320	[V]	KOG1515	Defense mechanisms	176	1e-44
ColeSingleton1796	Hs7662238	[B]	KOG2416	Chromatin structure and dynamics	52.4	3e-07
ColeSingleton1798	At1g14570	[O]	KOG1364	Posttranslational modification, protein turnover, chaperones	182	1e-56
ColeSingleton1800	At4g31970	[Q]	KOG0156	Secondary metabolites biosynthesis, transport and catabolism	125	4e-29
ColeSingleton1815	At3g01550	[G]	KOG1441	Carbohydrate transport and metabolism	67	2e-11
ColeSingleton1815	At3g01550	[E]	KOG1441	Amino acid transport and metabolism	67	2e-11
ColeSingleton1816	At2g37150	[O]	KOG0800	Posttranslational modification, protein turnover, chaperones	101	6e-22
ColeSingleton1818	At1g13750	[G]	KOG1378	Carbohydrate transport and metabolism	96.3	1e-20
ColeSingleton1822	At1g69370	[E]	KOG0795	Amino acid transport and metabolism	71.6	4e-13
ColeSingleton1826	At1g68100	[P]	KOG2693	Inorganic ion transport and metabolism	121	4e-28
ColeSingleton1837	At1g13980	[U]	KOG0928	Intracellular trafficking, secretion, and vesicular transport	246	2e-65
ColeSingleton1841	At5g13800	[R]	KOG1454	General function prediction only	89.4	2e-18
ColeSingleton1846	At2g37850	[O]	KOG0595	Posttranslational modification, protein turnover, chaperones	119	3e-27
ColeSingleton1846	At2g37850	[U]	KOG0595	Intracellular trafficking, secretion, and vesicular transport	119	3e-27
ColeSingleton1846	At2g37850	[T]	KOG0595	Signal transduction mechanisms	119	3e-27
ColeSingleton1847	At5g24170	[U]	KOG2887	Intracellular trafficking, secretion, and vesicular transport	160	8e-40
ColeSingleton1848	7290108	[R]	KOG0725	General function prediction only	41.6	2e-07
ColeSingleton1851	At5g47530	[T]	KOG4293	Signal transduction mechanisms	164	4e-41
ColeSingleton1853	At1g50500	[U]	KOG2180	Intracellular trafficking, secretion, and vesicular transport	117	6e-27
ColeSingleton1873	At2g36970	[G]	KOG1192	Carbohydrate transport and metabolism	74.7	4e-14
ColeSingleton1873	At2g36970	[C]	KOG1192	Energy production and conversion	74.7	4e-14
ColeSingleton1874	YNL067w	[J]	KOG3255	Translation, ribosomal structure and biogenesis	118	6e-45
ColeSingleton1875	At4g13350	[T]	KOG0702	Signal transduction mechanisms	94.7	5e-20
ColeSingleton1879	At3g45770	[K]	KOG0025	Transcription	58.5	3e-09
ColeSingleton1879	At3g45770	[C]	KOG0025	Energy production and conversion	58.5	3e-09
ColeSingleton1881	At1g61850	[I]	KOG4231	Lipid transport and metabolism	154	3e-38
ColeSingleton1882	At2g34560	[O]	KOG0738	Posttranslational modification, protein turnover, chaperones	213	1e-55
ColeSingleton1883	At2g20900	[I]	KOG1169	Lipid transport and metabolism	234	5e-62
ColeSingleton1883	At2g20900	[T]	KOG1169	Signal transduction mechanisms	234	5e-62
ColeSingleton1884	At2g13940	[R]	KOG0017	General function prediction only	129	3e-30
ColeSingleton1896	At5g16140	[J]	KOG2255	Translation, ribosomal structure and biogenesis	111	5e-25
ColeSingleton1901	At2g30140	[G]	KOG1192	Carbohydrate transport and metabolism	100	1e-21
ColeSingleton1901	At2g30140	[C]	KOG1192	Energy production and conversion	100	1e-21
ColeSingleton1902	At1g33440	[E]	KOG1237	Amino acid transport and metabolism	70.5	8e-13
ColeSingleton1912	At3g26700	[T]	KOG1187	Signal transduction mechanisms	65.5	3e-11
ColeSingleton1913	At1g32050	[U]	KOG3088	Intracellular trafficking, secretion, and vesicular transport	41.2	2e-06
ColeSingleton1919	At4g37360	[Q]	KOG0156	Secondary metabolites biosynthesis, transport and catabolism	103	1e-22
ColeSingleton1927	At2g48160	[K]	KOG1904	Transcription	47.8	1e-10
ColeSingleton1931	Hs13775232	[A]	KOG0331	RNA processing and modification	110	1e-24
ColeSingleton1945	At2g38290	[P]	KOG0682	Inorganic ion transport and metabolism	80.9	9e-16
ColeSingleton1954	Hs7706335	[T]	KOG2322	Signal transduction mechanisms	125	4e-29
ColeSingleton1956	At3g18060	[Z]	KOG0318	Cytoskeleton	216	1e-56
ColeSingleton1958	At2g16970	[R]	KOG2816	General function prediction only	97.1	2e-20
ColeSingleton1962	At3g55020	[U]	KOG2058	Intracellular trafficking, secretion, and vesicular transport	153	1e-37
ColeSingleton1964	At3g12160	[U]	KOG0087	Intracellular trafficking, secretion, and vesicular transport	112	3e-25
ColeSingleton1972	At5g64580	[O]	KOG0731	Posttranslational modification, protein turnover, chaperones	167	1e-41
ColeSingleton1973	At3g03010	[S]	KOG3282	Function unknown	60.1	1e-09
ColeSingleton1977	At2g33760	[R]	KOG4197	General function prediction only	59.3	3e-17
ColeSingleton1984	At1g79590	[U]	KOG3202	Intracellular trafficking, secretion, and vesicular transport	107	1e-23
ColeSingleton1985	At3g15880	[R]	KOG0266	General function prediction only	59.7	2e-17
ColeSingleton1990	At3g14390	[E]	KOG0622	Amino acid transport and metabolism	152	2e-37
ColeSingleton1991	At1g30570	[T]	KOG1187	Signal transduction mechanisms	138	4e-33
ColeSingleton1992	At4g13510	[P]	KOG0682	Inorganic ion transport and metabolism	199	2e-51
ColeSingleton1994	SPBC8D2.18c	[H]	KOG1370	Coenzyme transport and metabolism	115	5e-46
ColeSingleton1998	At3g45190	[D]	KOG2073	Cell cycle control, cell division, chromosome partitioning	206	1e-53
ColeSingleton1999	7296176	[T]	KOG4297	Signal transduction mechanisms	56.6	1e-08
ColeSingleton1999	7296176	[V]	KOG4297	Defense mechanisms	56.6	1e-08
ColeSingleton2001	At4g20490	[R]	KOG0017	General function prediction only	58.2	9e-09
ColeSingleton2002	At1g64280	[R]	KOG0504	General function prediction only	115	2e-26
ColeSingleton2007	At2g47140	[R]	KOG0725	General function prediction only	48.9	5e-12
ColeSingleton2013	At5g57870	[J]	KOG0401	Translation, ribosomal structure and biogenesis	153	1e-37
ColeSingleton2017	At3g15180	[O]	KOG4413	Posttranslational modification, protein turnover, chaperones	125	2e-29
ColeSingleton2019	Hs18553527	[U]	KOG1789	Intracellular trafficking, secretion, and vesicular transport	79.7	1e-15
ColeSingleton2019	Hs18553527	[O]	KOG1789	Posttranslational modification, protein turnover, chaperones	79.7	1e-15
ColeSingleton2023	At1g08840	[L]	KOG1805	Replication, recombination and repair	88.6	3e-18
ColeSingleton2033	At1g34080	[R]	KOG0017	General function prediction only	48.5	7e-06
ColeSingleton2043	7302912	[J]	KOG0898	Translation, ribosomal structure and biogenesis	62	3e-10
ColeSingleton2048	At4g34450	[U]	KOG1078	Intracellular trafficking, secretion, and vesicular transport	241	4e-64
ColeSingleton2051	At3g60180	[F]	KOG3079	Nucleotide transport and metabolism	52.8	2e-07
ColeSingleton2053	At3g13790	[G]	KOG0228	Carbohydrate transport and metabolism	55.1	4e-08
ColeSingleton2063	At3g16640	[D]	KOG1727	Cell cycle control, cell division, chromosome partitioning	49.3	2e-06
ColeSingleton2063	At3g16640	[Z]	KOG1727	Cytoskeleton	49.3	2e-06
ColeSingleton2065	At5g63800	[G]	KOG0496	Carbohydrate transport and metabolism	61.2	5e-10
ColeSingleton2068	At1g26520	[H]	KOG2743	Coenzyme transport and metabolism	171	7e-43
ColeSingleton2071	At5g07010	[R]	KOG1584	General function prediction only	47	2e-09
ColeSingleton2075	At3g08650	[P]	KOG2474	Inorganic ion transport and metabolism	98.6	2e-39
ColeSingleton2080	At4g39150	[O]	KOG0691	Posttranslational modification, protein turnover, chaperones	199	2e-51
ColeSingleton2086	At5g58790_1	[O]	KOG1039	Posttranslational modification, protein turnover, chaperones	52.4	2e-14
ColeSingleton2101	At4g38610	[O]	KOG0168	Posttranslational modification, protein turnover, chaperones	147	7e-36
ColeSingleton2104	At4g34110	[A]	KOG0123	RNA processing and modification	72	4e-13
ColeSingleton2104	At4g34110	[J]	KOG0123	Translation, ribosomal structure and biogenesis	72	4e-13
ColeSingleton2109	At2g05610	[R]	KOG0017	General function prediction only	83.6	9e-17
ColeSingleton2110	At5g16210	[T]	KOG0211	Signal transduction mechanisms	218	5e-57
ColeSingleton2112	At4g33150	[E]	KOG0172	Amino acid transport and metabolism	180	1e-63
ColeSingleton2113	At2g35660	[C]	KOG2614	Energy production and conversion	63.5	2e-11
ColeSingleton2113	At2g35660	[R]	KOG2614	General function prediction only	63.5	2e-11
ColeSingleton2114	SPAC3G9.09c	[J]	KOG2916	Translation, ribosomal structure and biogenesis	100	1e-21
ColeSingleton2127	At1g58250	[S]	KOG1910	Function unknown	117	8e-27
ColeSingleton2129	At3g54860	[U]	KOG1302	Intracellular trafficking, secretion, and vesicular transport	80.5	8e-16
ColeSingleton2132	At1g54280	[R]	KOG0206	General function prediction only	121	3e-28
ColeSingleton2148	At1g68710	[R]	KOG0206	General function prediction only	218	3e-57
ColeSingleton2154	At5g09220	[E]	KOG1303	Amino acid transport and metabolism	58.9	4e-09
ColeSingleton2159	At5g51660	[A]	KOG1896	RNA processing and modification	173	1e-43
ColeSingleton2160	At2g47500	[Z]	KOG0239	Cytoskeleton	100	6e-22
ColeSingleton2161	YNL031c	[B]	KOG1745	Chromatin structure and dynamics	236	1e-62
ColeSingleton2173	At3g57340	[O]	KOG0714	Posttranslational modification, protein turnover, chaperones	105	3e-23
ColeSingleton2186	At1g80340	[Q]	KOG0143	Secondary metabolites biosynthesis, transport and catabolism	181	6e-46
ColeSingleton2186	At1g80340	[R]	KOG0143	General function prediction only	181	6e-46
ColeSingleton2187	At4g24280	[O]	KOG0102	Posttranslational modification, protein turnover, chaperones	76.6	4e-19
ColeSingleton2190	At5g16270	[D]	KOG1213	Cell cycle control, cell division, chromosome partitioning	141	4e-35
ColeSingleton2192	At1g36160	[I]	KOG0368	Lipid transport and metabolism	53.1	1e-07
ColeSingleton2216	At3g21420	[Q]	KOG0143	Secondary metabolites biosynthesis, transport and catabolism	197	7e-51
ColeSingleton2216	At3g21420	[R]	KOG0143	General function prediction only	197	7e-51
ColeSingleton2220	At2g40930	[O]	KOG1870	Posttranslational modification, protein turnover, chaperones	96.3	2e-20
ColeSingleton2222	At5g60250	[O]	KOG1812	Posttranslational modification, protein turnover, chaperones	164	8e-41
ColeSingleton2239	At5g17990	[E]	KOG1438	Amino acid transport and metabolism	124	4e-29
ColeSingleton2246	At5g49650	[G]	KOG2531	Carbohydrate transport and metabolism	110	7e-25
ColeSingleton2255	At3g51620	[L]	KOG1906	Replication, recombination and repair	111	4e-25
ColeSingleton2261	At4g10710	[E]	KOG1189	Amino acid transport and metabolism	97.8	5e-21
ColeSingleton2268	At2g30910	[Z]	KOG1523	Cytoskeleton	85.9	2e-17
ColeSingleton2269	At1g59820	[R]	KOG0206	General function prediction only	103	1e-22
ColeSingleton2281	CE20374	[O]	KOG0865	Posttranslational modification, protein turnover, chaperones	47	9e-06
ColeSingleton2289	At5g49030	[J]	KOG0433	Translation, ribosomal structure and biogenesis	230	1e-64
ColeSingleton2291	At1g19520	[R]	KOG4197	General function prediction only	72	3e-13
ColeSingleton2293	At1g10950	[U]	KOG1277	Intracellular trafficking, secretion, and vesicular transport	64.7	4e-11
ColeSingleton2297	At2g34380	[S]	KOG4200	Function unknown	117	2e-28
ColeSingleton2299	At2g21390	[U]	KOG0292	Intracellular trafficking, secretion, and vesicular transport	56.6	1e-08
ColeSingleton2301	At1g10370	[O]	KOG0406	Posttranslational modification, protein turnover, chaperones	184	7e-47
ColeSingleton2310	At3g05190	[E]	KOG0975	Amino acid transport and metabolism	74.7	4e-14
ColeSingleton2314	At3g49630	[Q]	KOG0143	Secondary metabolites biosynthesis, transport and catabolism	119	2e-27
ColeSingleton2314	At3g49630	[R]	KOG0143	General function prediction only	119	2e-27
ColeSingleton2315	At1g10200	[T]	KOG1700	Signal transduction mechanisms	93.2	1e-19
ColeSingleton2315	At1g10200	[Z]	KOG1700	Cytoskeleton	93.2	1e-19
ColeSingleton2320	At5g35750	[T]	KOG0519	Signal transduction mechanisms	116	4e-47
ColeSingleton2323	At2g17290	[T]	KOG0032	Signal transduction mechanisms	246	6e-66
ColeSingleton2325	YER136w	[O]	KOG1439	Posttranslational modification, protein turnover, chaperones	113	2e-25
ColeSingleton2327	At5g14950	[G]	KOG1958	Carbohydrate transport and metabolism	108	4e-24
ColeSingleton2335	At5g65980	[S]	KOG2722	Function unknown	143	1e-37
ColeSingleton2336	At4g25000	[G]	KOG0471	Carbohydrate transport and metabolism	95.5	2e-20
ColeSingleton2339	At2g23140	[S]	KOG0167	Function unknown	96.7	2e-20
ColeSingleton2340	At4g32600	[O]	KOG0800	Posttranslational modification, protein turnover, chaperones	100	1e-21
ColeSingleton2344	At4g28600	[T]	KOG4162	Signal transduction mechanisms	102	3e-22
ColeSingleton2350	At3g60580	[R]	KOG1721	General function prediction only	58.5	6e-09
ColeSingleton2355	At5g56030	[O]	KOG0019	Posttranslational modification, protein turnover, chaperones	63.5	1e-10
ColeSingleton2359	At4g35790	[I]	KOG1329	Lipid transport and metabolism	131	4e-31
ColeSingleton2363	At3g61440	[E]	KOG1252	Amino acid transport and metabolism	94	1e-33
ColeSingleton2371	At1g67680	[U]	KOG2376	Intracellular trafficking, secretion, and vesicular transport	103	9e-23
ColeSingleton2376	At3g15650	[I]	KOG2112	Lipid transport and metabolism	65.5	3e-11
ColeSingleton2378	At3g14630	[Q]	KOG0157	Secondary metabolites biosynthesis, transport and catabolism	85.1	2e-20
ColeSingleton2378	At3g14630	[I]	KOG0157	Lipid transport and metabolism	85.1	2e-20
ColeSingleton2386	At3g06370	[P]	KOG1965	Inorganic ion transport and metabolism	52	4e-12
ColeSingleton2398	At2g29940	[Q]	KOG0065	Secondary metabolites biosynthesis, transport and catabolism	243	1e-64
ColeSingleton2403	At5g27680	[L]	KOG0351	Replication, recombination and repair	61.2	5e-10
ColeSingleton2407	At3g19230	[R]	KOG0619	General function prediction only	132	2e-31
ColeSingleton2408	At3g61460	[O]	KOG0800	Posttranslational modification, protein turnover, chaperones	68.9	2e-12
ColeSingleton2414	At4g32500	[P]	KOG0498	Inorganic ion transport and metabolism	84.7	4e-17
ColeSingleton2414	At4g32500	[T]	KOG0498	Signal transduction mechanisms	84.7	4e-17
ColeSingleton2419	At1g63700	[T]	KOG0198	Signal transduction mechanisms	176	1e-44
ColeSingleton2421	At1g02270	[K]	KOG2338	Transcription	91.3	2e-38
ColeSingleton2428	At5g14230	[R]	KOG0504	General function prediction only	50.8	1e-06
ColeSingleton2431	At5g01240	[E]	KOG1303	Amino acid transport and metabolism	87.4	9e-18
ColeSingleton2432	At5g60390	[J]	KOG0052	Translation, ribosomal structure and biogenesis	99.4	2e-21
ColeSingleton2439	At3g21250	[Q]	KOG0054	Secondary metabolites biosynthesis, transport and catabolism	157	8e-39
ColeSingleton2451	At5g17310	[G]	KOG2638	Carbohydrate transport and metabolism	122	3e-28
ColeSingleton2452	At1g08470	[R]	KOG1520	General function prediction only	165	5e-50
ColeSingleton2454	At1g70740	[T]	KOG1187	Signal transduction mechanisms	186	6e-58
ColeSingleton2455	At2g05170	[U]	KOG2114	Intracellular trafficking, secretion, and vesicular transport	186	1e-47
ColeSingleton2456	At5g64630	[B]	KOG1009	Chromatin structure and dynamics	68.2	7e-21
ColeSingleton2456	At5g64630	[L]	KOG1009	Replication, recombination and repair	68.2	7e-21
ColeSingleton2466	At4g36270	[D]	KOG1845	Cell cycle control, cell division, chromosome partitioning	196	1e-50
ColeSingleton2468	At4g38250	[E]	KOG1304	Amino acid transport and metabolism	77.8	9e-15
ColeSingleton2471	At3g06400	[K]	KOG0385	Transcription	50.1	2e-06
ColeSingleton2472	At4g39920	[O]	KOG2512	Posttranslational modification, protein turnover, chaperones	118	3e-27
ColeSingleton2473	At5g20990	[H]	KOG2371	Coenzyme transport and metabolism	72.4	3e-13
ColeSingleton2479	At1g66900	[R]	KOG1552	General function prediction only	40.8	4e-07
ColeSingleton2486	At5g52660	[O]	KOG0724	Posttranslational modification, protein turnover, chaperones	134	5e-32
ColeSingleton2495	At2g24270	[C]	KOG2450	Energy production and conversion	80.5	8e-16
ColeSingleton2502	At2g28520	[C]	KOG2189	Energy production and conversion	161	3e-40
ColeSingleton2507	At1g47330	[S]	KOG2118	Function unknown	115	3e-26
ColeSingleton2508	At2g07420	[R]	KOG0017	General function prediction only	53.9	8e-08
ColeSingleton2515	At5g15540	[B]	KOG1020	Chromatin structure and dynamics	111	1e-27
ColeSingleton2515	At5g15540	[D]	KOG1020	Cell cycle control, cell division, chromosome partitioning	111	1e-27
ColeSingleton2515	At5g15540	[L]	KOG1020	Replication, recombination and repair	111	1e-27
ColeSingleton2518	At1g78610	[M]	KOG4629	Cell wall/membrane/envelope biogenesis	103	9e-23
ColeSingleton2531	At5g14670	[U]	KOG0070	Intracellular trafficking, secretion, and vesicular transport	130	1e-30
ColeSingleton2535	Hs7305273	[O]	KOG1039	Posttranslational modification, protein turnover, chaperones	80.1	1e-15
ColeSingleton2546	At3g11910	[O]	KOG1863	Posttranslational modification, protein turnover, chaperones	100	7e-22
ColeSingleton2556	At4g15110	[Q]	KOG0157	Secondary metabolites biosynthesis, transport and catabolism	75.9	2e-14
ColeSingleton2556	At4g15110	[I]	KOG0157	Lipid transport and metabolism	75.9	2e-14
ColeSingleton2563	At2g44740	[R]	KOG1674	General function prediction only	67.4	7e-12
ColeSingleton2575	At3g14470	[T]	KOG4658	Signal transduction mechanisms	117	8e-27
ColeSingleton2581	At3g55950	[T]	KOG1187	Signal transduction mechanisms	90.9	6e-19
ColeSingleton2582	At3g27850	[J]	KOG1715	Translation, ribosomal structure and biogenesis	49.3	2e-06
ColeSingleton2589	Hs4505285	[W]	KOG1216	Extracellular structures	48.5	3e-06
ColeSingleton2589	Hs4505285	[V]	KOG1216	Defense mechanisms	48.5	3e-06
ColeSingleton2591	At3g13060	[R]	KOG1901	General function prediction only	172	2e-43
ColeSingleton2600	At2g29070	[O]	KOG1816	Posttranslational modification, protein turnover, chaperones	142	3e-34
ColeSingleton2604	At1g79810	[O]	KOG2879	Posttranslational modification, protein turnover, chaperones	137	7e-33
ColeSingleton2611	At1g52810	[Q]	KOG0143	Secondary metabolites biosynthesis, transport and catabolism	65.9	3e-11
ColeSingleton2611	At1g52810	[R]	KOG0143	General function prediction only	65.9	3e-11
ColeSingleton2630	At2g06840	[R]	KOG0017	General function prediction only	66.6	2e-20
ColeSingleton2637	At1g01580	[P]	KOG0039	Inorganic ion transport and metabolism	138	4e-33
ColeSingleton2637	At1g01580	[Q]	KOG0039	Secondary metabolites biosynthesis, transport and catabolism	138	4e-33
ColeSingleton2639	At5g11110	[M]	KOG0853	Cell wall/membrane/envelope biogenesis	52.8	2e-07
ColeSingleton2655	At1g01220_1	[G]	KOG4644	Carbohydrate transport and metabolism	147	1e-35
ColeSingleton2664	At2g41970	[T]	KOG1187	Signal transduction mechanisms	180	7e-46
ColeSingleton2665	At4g30990	[V]	KOG1823	Defense mechanisms	110	7e-25
ColeSingleton2681	At1g33430	[G]	KOG2288	Carbohydrate transport and metabolism	52.8	2e-07
ColeSingleton2682	At5g20660	[O]	KOG2194	Posttranslational modification, protein turnover, chaperones	92	5e-19
ColeSingleton2682	At5g20660	[R]	KOG2194	General function prediction only	92	5e-19
ColeSingleton2683	At1g20510	[I]	KOG1176	Lipid transport and metabolism	129	1e-30
ColeSingleton2685	At5g08640	[Q]	KOG0143	Secondary metabolites biosynthesis, transport and catabolism	93.2	2e-19
ColeSingleton2685	At5g08640	[R]	KOG0143	General function prediction only	93.2	2e-19
ColeSingleton2690	At2g10780	[R]	KOG0017	General function prediction only	59.7	3e-09
ColeSingleton2699	At1g07300	[R]	KOG2934	General function prediction only	73.6	9e-14
ColeSingleton2708	7295592	[K]	KOG2845	Transcription	105	2e-23
ColeSingleton2717	At5g08630	[B]	KOG1245	Chromatin structure and dynamics	107	4e-24
ColeSingleton2718	At5g03260	[Q]	KOG1263	Secondary metabolites biosynthesis, transport and catabolism	170	6e-45
ColeSingleton2719	At5g50650	[U]	KOG0771	Intracellular trafficking, secretion, and vesicular transport	70.9	1e-12
ColeSingleton2723	At2g17670	[R]	KOG4197	General function prediction only	85.9	2e-17
ColeSingleton2725	Hs19923466	[A]	KOG1869	RNA processing and modification	66.2	2e-11
ColeSingleton2728	At1g68200	[R]	KOG1677	General function prediction only	179	3e-45
ColeSingleton2729	At5g46070	[R]	KOG2037	General function prediction only	148	4e-36
ColeSingleton2732	At5g42340	[S]	KOG0167	Function unknown	163	1e-40
ColeSingleton2733	At2g07420	[R]	KOG0017	General function prediction only	73.9	1e-13
ColeSingleton2736	At2g04032	[P]	KOG1558	Inorganic ion transport and metabolism	170	1e-42
ColeSingleton2747	At2g34560	[O]	KOG0738	Posttranslational modification, protein turnover, chaperones	70.9	6e-13
ColeSingleton2752	At1g02890_2	[O]	KOG0737	Posttranslational modification, protein turnover, chaperones	165	2e-41
ColeSingleton2753	At5g23150	[K]	KOG1904	Transcription	47.4	7e-06
ColeSingleton2754	At4g15930	[Z]	KOG3430	Cytoskeleton	104	5e-23
ColeSingleton2759	At5g03070	[U]	KOG0166	Intracellular trafficking, secretion, and vesicular transport	142	2e-39
ColeSingleton2762	Hs14149665	[K]	KOG1874	Transcription	53.1	1e-07
ColeSingleton2763	At4g00840	[R]	KOG1315	General function prediction only	186	1e-47
ColeSingleton2772	At3g07300	[J]	KOG1465	Translation, ribosomal structure and biogenesis	135	2e-32
ColeSingleton2774	At1g54610	[D]	KOG0600	Cell cycle control, cell division, chromosome partitioning	50.4	9e-07
ColeSingleton2778	At1g74770	[R]	KOG1940	General function prediction only	83.2	1e-16
ColeSingleton2779	At4g32070	[O]	KOG4151	Posttranslational modification, protein turnover, chaperones	167	1e-41
ColeSingleton2779	At4g32070	[D]	KOG4151	Cell cycle control, cell division, chromosome partitioning	167	1e-41
ColeSingleton2779	At4g32070	[R]	KOG4151	General function prediction only	167	1e-41
ColeSingleton2780	At1g14010	[U]	KOG1691	Intracellular trafficking, secretion, and vesicular transport	119	1e-27
ColeSingleton2785	At4g35160	[R]	KOG3178	General function prediction only	48.5	3e-06
ColeSingleton2794	At1g67420	[O]	KOG2194	Posttranslational modification, protein turnover, chaperones	82	3e-16
ColeSingleton2794	At1g67420	[R]	KOG2194	General function prediction only	82	3e-16
ColeSingleton2797	SPBC3D6.14c	[G]	KOG4157	Carbohydrate transport and metabolism	54.3	6e-08
ColeSingleton2797	SPBC3D6.14c	[O]	KOG4157	Posttranslational modification, protein turnover, chaperones	54.3	6e-08
ColeSingleton2798	At1g27285	[R]	KOG0017	General function prediction only	44.3	9e-08
ColeSingleton2806	At4g24440	[K]	KOG3463	Transcription	101	3e-22
ColeSingleton2807	At3g11680	[R]	KOG4711	General function prediction only	64.7	5e-11
ColeSingleton2809	SPCC1739.13	[O]	KOG0101	Posttranslational modification, protein turnover, chaperones	40.4	2e-06
ColeSingleton2810	At5g40290	[S]	KOG2681	Function unknown	71.6	4e-14
ColeSingleton2811	At2g47390	[O]	KOG2100	Posttranslational modification, protein turnover, chaperones	138	4e-33
ColeSingleton2813	At4g24760	[R]	KOG1552	General function prediction only	57.8	3e-13
ColeSingleton2814	At5g36950	[O]	KOG1320	Posttranslational modification, protein turnover, chaperones	56.2	2e-08
ColeSingleton2818	At4g07400	[R]	KOG1947	General function prediction only	77.4	1e-14
ColeSingleton2828	At5g14670	[U]	KOG0070	Intracellular trafficking, secretion, and vesicular transport	57.4	3e-16
ColeSingleton2837	At3g44640	[L]	KOG4585	Replication, recombination and repair	40.8	1e-08
ColeSingleton2843	At2g04740	[R]	KOG0511	General function prediction only	85.9	6e-32
ColeSingleton2845	At5g49130	[R]	KOG1347	General function prediction only	174	2e-49
ColeSingleton2851	At3g13445	[K]	KOG3302	Transcription	107	8e-24
ColeSingleton2853	At2g35800	[C]	KOG0768	Energy production and conversion	149	2e-39
ColeSingleton2864	At3g25230	[O]	KOG0543	Posttranslational modification, protein turnover, chaperones	66.2	2e-11
ColeSingleton2866	At4g32720	[R]	KOG0118	General function prediction only	101	4e-22
ColeSingleton2872	At5g27640	[J]	KOG2314	Translation, ribosomal structure and biogenesis	45.4	8e-13
ColeSingleton2874	At3g13940	[K]	KOG4183	Transcription	93.6	1e-19
ColeSingleton2882	7296188	[R]	KOG3009	General function prediction only	48.9	4e-06
ColeSingleton2885	At2g35430	[R]	KOG1677	General function prediction only	52.8	2e-07
ColeSingleton2888	At5g04600	[R]	KOG4208	General function prediction only	54.7	2e-10
ColeSingleton2897	SPBC11C11.07	[J]	KOG1714	Translation, ribosomal structure and biogenesis	101	7e-22
ColeSingleton2901	At1g35470	[R]	KOG1477	General function prediction only	197	5e-51
ColeSingleton2902	At5g57120	[Y]	KOG2992	Nuclear structure	48.9	3e-06
ColeSingleton2911	Hs4826838	[Q]	KOG0054	Secondary metabolites biosynthesis, transport and catabolism	82.8	2e-24
ColeSingleton2917	YOR054c	[P]	KOG0672	Inorganic ion transport and metabolism	79.7	2e-15
ColeSingleton2917	YOR054c	[D]	KOG0672	Cell cycle control, cell division, chromosome partitioning	79.7	2e-15
ColeSingleton2919	At3g23660	[U]	KOG1986	Intracellular trafficking, secretion, and vesicular transport	221	4e-68
ColeSingleton2920	At5g58710	[O]	KOG0865	Posttranslational modification, protein turnover, chaperones	83.2	2e-16
ColeSingleton2922	At1g48790	[T]	KOG2880	Signal transduction mechanisms	198	5e-51
ColeSingleton2923	At2g39290	[I]	KOG1617	Lipid transport and metabolism	55.5	6e-08
ColeSingleton2929	At1g26560	[G]	KOG0626	Carbohydrate transport and metabolism	220	2e-62
ColeSingleton2933	At2g47800	[Q]	KOG0054	Secondary metabolites biosynthesis, transport and catabolism	53.5	1e-07
ColeSingleton2934	At5g12220	[R]	KOG2425	General function prediction only	48.9	3e-09
ColeSingleton2936	At4g25590	[Z]	KOG1735	Cytoskeleton	73.9	7e-14
ColeSingleton2938	At5g06550	[B]	KOG2130	Chromatin structure and dynamics	68.2	4e-12
ColeSingleton2938	At5g06550	[T]	KOG2130	Signal transduction mechanisms	68.2	4e-12
ColeSingleton2949	At4g04940	[R]	KOG1539	General function prediction only	135	5e-32
ColeSingleton2954	At1g13160	[D]	KOG2229	Cell cycle control, cell division, chromosome partitioning	126	2e-29
ColeSingleton2954	At1g13160	[Z]	KOG2229	Cytoskeleton	126	2e-29
ColeSingleton2959	At4g39450	[S]	KOG1884	Function unknown	261	4e-70
ColeSingleton2972	At1g78770	[D]	KOG1173	Cell cycle control, cell division, chromosome partitioning	228	1e-64
ColeSingleton2972	At1g78770	[O]	KOG1173	Posttranslational modification, protein turnover, chaperones	228	1e-64
ColeSingleton2977	YOR063w	[J]	KOG0746	Translation, ribosomal structure and biogenesis	152	2e-37
ColeSingleton2982	At2g24240	[R]	KOG2714	General function prediction only	218	2e-57
ColeSingleton2985	At5g55670	[R]	KOG0118	General function prediction only	60.1	1e-09
ColeSingleton2987	At1g06410	[G]	KOG1050	Carbohydrate transport and metabolism	164	3e-41
ColeSingleton2998	At1g08400	[U]	KOG2218	Intracellular trafficking, secretion, and vesicular transport	51.6	6e-07
ColeSingleton2998	At1g08400	[D]	KOG2218	Cell cycle control, cell division, chromosome partitioning	51.6	6e-07
ColeSingleton3008	At5g63770	[I]	KOG1169	Lipid transport and metabolism	123	2e-28
ColeSingleton3008	At5g63770	[T]	KOG1169	Signal transduction mechanisms	123	2e-28
ColeSingleton3017	At1g01910	[P]	KOG2825	Inorganic ion transport and metabolism	220	1e-57
ColeSingleton3029	At5g15550	[Z]	KOG0313	Cytoskeleton	105	2e-23
ColeSingleton3034	At4g26600	[A]	KOG1122	RNA processing and modification	103	9e-23
ColeSingleton3042	At3g55070	[S]	KOG0396	Function unknown	192	2e-49
ColeSingleton3049	At2g47500	[Z]	KOG0239	Cytoskeleton	53.1	1e-09
ColeSingleton3053	At4g08830	[R]	KOG1075	General function prediction only	56.2	2e-08
ColeSingleton3057	SPBC405.07	[J]	KOG3452	Translation, ribosomal structure and biogenesis	75.1	6e-19
ColeSingleton3058	At2g44740	[R]	KOG1674	General function prediction only	214	7e-56
ColeSingleton3059	At2g01680	[R]	KOG0504	General function prediction only	159	2e-39
ColeSingleton3062	At1g62310	[K]	KOG1356	Transcription	90.1	3e-23
ColeSingleton3064	At4g35160	[R]	KOG3178	General function prediction only	49.3	2e-06
ColeSingleton3070	At1g03000	[O]	KOG0736	Posttranslational modification, protein turnover, chaperones	62.8	2e-10
ColeSingleton3074	At3g16640	[D]	KOG1727	Cell cycle control, cell division, chromosome partitioning	95.5	2e-20
ColeSingleton3074	At3g16640	[Z]	KOG1727	Cytoskeleton	95.5	2e-20
ColeSingleton3081	At1g77660	[R]	KOG0231	General function prediction only	89.4	1e-20
ColeSingleton3083	At5g54110	[U]	KOG0439	Intracellular trafficking, secretion, and vesicular transport	88.2	4e-18
ColeSingleton3085	At2g29940	[Q]	KOG0065	Secondary metabolites biosynthesis, transport and catabolism	229	2e-60
ColeSingleton3097	At5g04670	[K]	KOG2261	Transcription	105	3e-23
ColeSingleton3103	At3g14570	[M]	KOG0916	Cell wall/membrane/envelope biogenesis	102	2e-22
ColeSingleton3104	At1g17120	[E]	KOG1286	Amino acid transport and metabolism	206	9e-54
ColeSingleton3125	At2g13940	[R]	KOG0017	General function prediction only	58.9	4e-09
ColeSingleton3128	At3g18070	[G]	KOG0626	Carbohydrate transport and metabolism	48.1	3e-09
ColeSingleton3134	At1g55860	[O]	KOG0939	Posttranslational modification, protein turnover, chaperones	196	1e-50
ColeSingleton3134	At1g55860	[K]	KOG0939	Transcription	196	1e-50
ColeSingleton3136	At3g42790	[R]	KOG1632	General function prediction only	69.3	2e-12
ColeSingleton3137	At5g04360	[G]	KOG0470	Carbohydrate transport and metabolism	151	2e-45
ColeSingleton3148	At4g30210	[C]	KOG1158	Energy production and conversion	47.4	7e-06
ColeSingleton3149	At3g09270	[O]	KOG0406	Posttranslational modification, protein turnover, chaperones	85.1	3e-17
ColeSingleton3163	At1g14860	[T]	KOG2839	Signal transduction mechanisms	162	1e-40
ColeSingleton3165	At5g01270	[K]	KOG0323	Transcription	97.1	8e-21
ColeSingleton3167	At5g13980	[G]	KOG1959	Carbohydrate transport and metabolism	138	7e-39
ColeSingleton3175	At2g26710	[Q]	KOG0157	Secondary metabolites biosynthesis, transport and catabolism	81.3	5e-16
ColeSingleton3175	At2g26710	[I]	KOG0157	Lipid transport and metabolism	81.3	5e-16
ColeSingleton3178	At5g12200	[F]	KOG2584	Nucleotide transport and metabolism	119	3e-27
ColeSingleton3181	At3g55610_2	[E]	KOG4165	Amino acid transport and metabolism	105	5e-23
ColeSingleton3191	At2g45070	[O]	KOG3457	Posttranslational modification, protein turnover, chaperones	108	3e-24
ColeSingleton3192	At1g05530	[G]	KOG1192	Carbohydrate transport and metabolism	126	2e-29
ColeSingleton3192	At1g05530	[C]	KOG1192	Energy production and conversion	126	2e-29
ColeSingleton3194	At5g04360	[G]	KOG0470	Carbohydrate transport and metabolism	60.8	6e-10
ColeSingleton3217	At3g43920	[A]	KOG0701	RNA processing and modification	60.1	1e-09
ColeSingleton3218	At1g09010	[G]	KOG2230	Carbohydrate transport and metabolism	185	2e-47
ColeSingleton3225	At5g49460	[C]	KOG1254	Energy production and conversion	306	1e-83
ColeSingleton3243	At2g31080	[R]	KOG1075	General function prediction only	65.1	5e-11
ColeSingleton3248	At4g35470	[R]	KOG0619	General function prediction only	62.4	2e-10
ColeSingleton3251	At4g34110	[A]	KOG0123	RNA processing and modification	59.3	3e-09
ColeSingleton3251	At4g34110	[J]	KOG0123	Translation, ribosomal structure and biogenesis	59.3	3e-09
ColeSingleton3252	At1g13440	[G]	KOG0657	Carbohydrate transport and metabolism	107	6e-24
ColeSingleton3262	At1g24706	[K]	KOG1874	Transcription	182	2e-46
ColeSingleton3270	At5g38470	[L]	KOG0011	Replication, recombination and repair	85.5	2e-17
ColeSingleton3277	At1g50260	[R]	KOG1012	General function prediction only	79.3	9e-26
ColeSingleton3293	At2g04620	[P]	KOG1484	Inorganic ion transport and metabolism	176	5e-53
ColeSingleton3297	At2g07420	[R]	KOG0017	General function prediction only	125	6e-29
ColeSingleton3312	At3g23990	[O]	KOG0356	Posttranslational modification, protein turnover, chaperones	172	1e-43
ColeSingleton3318	At1g61140	[K]	KOG1001	Transcription	125	2e-29
ColeSingleton3318	At1g61140	[L]	KOG1001	Replication, recombination and repair	125	2e-29
ColeSingleton3319	At3g02310	[K]	KOG0014	Transcription	92.4	2e-19
ColeSingleton3346	At5g47010	[A]	KOG1802	RNA processing and modification	143	1e-35
ColeSingleton3349	At1g58240	[U]	KOG1787	Intracellular trafficking, secretion, and vesicular transport	125	2e-29
ColeSingleton3353	At4g35850	[R]	KOG4197	General function prediction only	93.6	1e-19
ColeSingleton3357	At5g49030	[J]	KOG0433	Translation, ribosomal structure and biogenesis	242	8e-67
ColeSingleton3360	At5g20710	[G]	KOG0496	Carbohydrate transport and metabolism	70.9	6e-13
ColeSingleton3364	At5g07900	[K]	KOG1267	Transcription	47.8	7e-13
ColeSingleton3364	At5g07900	[R]	KOG1267	General function prediction only	47.8	7e-13
ColeSingleton3367	At5g18230	[K]	KOG2150	Transcription	114	4e-26
ColeSingleton3368	At1g15960	[P]	KOG1291	Inorganic ion transport and metabolism	89.4	3e-18
ColeSingleton3369	At1g13900	[G]	KOG1378	Carbohydrate transport and metabolism	233	1e-68
ColeSingleton3373	At2g33740	[P]	KOG3338	Inorganic ion transport and metabolism	95.9	2e-20
ColeSingleton3380	At5g44240	[R]	KOG0206	General function prediction only	273	1e-73
ColeSingleton3403	At4g09560	[O]	KOG4628	Posttranslational modification, protein turnover, chaperones	66.6	2e-14
ColeSingleton3408	At4g32610	[C]	KOG2536	Energy production and conversion	112	1e-25
ColeSingleton3409	At5g57260	[Q]	KOG0156	Secondary metabolites biosynthesis, transport and catabolism	107	1e-23
ColeSingleton3412	At1g65430	[O]	KOG1815	Posttranslational modification, protein turnover, chaperones	226	1e-59
ColeSingleton3416	At2g14930	[R]	KOG0017	General function prediction only	52.4	6e-10
ColeSingleton3417	At2g16460	[S]	KOG3156	Function unknown	98.2	6e-21
ColeSingleton3418	At4g38240	[G]	KOG1413	Carbohydrate transport and metabolism	98.2	6e-21
ColeSingleton3432	At1g31260	[P]	KOG1558	Inorganic ion transport and metabolism	95.5	6e-25
ColeSingleton3436	At4g04290	[R]	KOG0017	General function prediction only	100	6e-32
ColeSingleton3440	7290870	[K]	KOG1474	Transcription	43.1	2e-06
ColeSingleton3447	At5g11010	[R]	KOG2750	General function prediction only	67.4	7e-12
ColeSingleton3458	At2g20580	[O]	KOG2005	Posttranslational modification, protein turnover, chaperones	209	2e-54
ColeSingleton3468	At1g26150	[T]	KOG1187	Signal transduction mechanisms	51.6	6e-07
ColeSingleton3484	At2g22910	[E]	KOG2436	Amino acid transport and metabolism	125	7e-31
ColeSingleton3485	At3g12180	[O]	KOG2729	Posttranslational modification, protein turnover, chaperones	128	2e-30
ColeSingleton3485	At3g12180	[U]	KOG2729	Intracellular trafficking, secretion, and vesicular transport	128	2e-30
ColeSingleton3485	At3g12180	[T]	KOG2729	Signal transduction mechanisms	128	2e-30
ColeSingleton3487	At5g12150	[T]	KOG4271	Signal transduction mechanisms	102	3e-22
ColeSingleton3489	At4g15550	[G]	KOG1192	Carbohydrate transport and metabolism	95.1	3e-20
ColeSingleton3489	At4g15550	[C]	KOG1192	Energy production and conversion	95.1	3e-20
ColeSingleton3491	At1g15740	[R]	KOG1947	General function prediction only	62	2e-13
ColeSingleton3497	At2g41580	[R]	KOG1075	General function prediction only	53.9	2e-07
ColeSingleton3500	At5g08630	[B]	KOG1245	Chromatin structure and dynamics	139	3e-33
ColeSingleton3503	At1g64350	[Y]	KOG2445	Nuclear structure	86.3	2e-26
ColeSingleton3503	At1g64350	[U]	KOG2445	Intracellular trafficking, secretion, and vesicular transport	86.3	2e-26
ColeSingleton3506	At4g16370	[T]	KOG2262	Signal transduction mechanisms	121	3e-28
ColeSingleton3518	At1g03050	[T]	KOG0251	Signal transduction mechanisms	211	5e-55
ColeSingleton3518	At1g03050	[U]	KOG0251	Intracellular trafficking, secretion, and vesicular transport	211	5e-55
ColeSingleton3520	At3g44640	[L]	KOG4585	Replication, recombination and repair	77	6e-15
ColeSingleton3527	At1g05570	[M]	KOG0916	Cell wall/membrane/envelope biogenesis	159	2e-41
ColeSingleton3528	At4g03080_2	[T]	KOG0374	Signal transduction mechanisms	233	8e-62
ColeSingleton3528	At4g03080_2	[R]	KOG0374	General function prediction only	233	8e-62
ColeSingleton3533	At2g10780	[R]	KOG0017	General function prediction only	131	3e-31
ColeSingleton3543	At5g65820	[R]	KOG4197	General function prediction only	169	1e-42
ColeSingleton3546	At4g03810	[R]	KOG0017	General function prediction only	54.7	7e-15
ColeSingleton3553	At1g49630	[R]	KOG2019	General function prediction only	153	1e-37
ColeSingleton3553	At1g49630	[O]	KOG2019	Posttranslational modification, protein turnover, chaperones	153	1e-37
ColeSingleton3565	At5g01240	[E]	KOG1303	Amino acid transport and metabolism	83.6	9e-17
ColeSingleton3566	Hs14149665	[K]	KOG1874	Transcription	55.5	3e-08
ColeSingleton3568	At4g12430	[G]	KOG1050	Carbohydrate transport and metabolism	69.7	1e-17
ColeSingleton3569	At1g05680	[G]	KOG1192	Carbohydrate transport and metabolism	52.4	2e-07
ColeSingleton3569	At1g05680	[C]	KOG1192	Energy production and conversion	52.4	2e-07
ColeSingleton3584	At3g17510	[T]	KOG0583	Signal transduction mechanisms	65.1	3e-11
ColeSingleton3589	At4g15180	[B]	KOG1080	Chromatin structure and dynamics	277	6e-75
ColeSingleton3589	At4g15180	[K]	KOG1080	Transcription	277	6e-75
ColeSingleton3608	At2g22740_2	[B]	KOG1082	Chromatin structure and dynamics	45.8	6e-08
ColeSingleton3608	At2g22740_2	[K]	KOG1082	Transcription	45.8	6e-08
ColeSingleton3614	At3g15980	[U]	KOG0276	Intracellular trafficking, secretion, and vesicular transport	192	1e-49
ColeSingleton3620	At5g67320	[B]	KOG0273	Chromatin structure and dynamics	50.8	1e-06
ColeSingleton3621	At1g27760	[Z]	KOG2842	Cytoskeleton	56.2	2e-08
ColeSingleton3626	At1g53570	[T]	KOG0198	Signal transduction mechanisms	92.8	1e-19
ColeSingleton3629	At3g10530	[A]	KOG1272	RNA processing and modification	88.2	4e-18
ColeSingleton3632	At4g39450	[S]	KOG1884	Function unknown	55.5	2e-08
ColeSingleton3637	At5g50320	[B]	KOG2535	Chromatin structure and dynamics	74.3	1e-13
ColeSingleton3637	At5g50320	[K]	KOG2535	Transcription	74.3	1e-13
ColeSingleton3638	At1g26560	[G]	KOG0626	Carbohydrate transport and metabolism	114	1e-25
ColeSingleton3642	At5g15020	[B]	KOG4204	Chromatin structure and dynamics	57.4	1e-08
ColeSingleton3646	At4g02010	[T]	KOG1187	Signal transduction mechanisms	80.1	2e-15
ColeSingleton3649	At5g14060	[E]	KOG0456	Amino acid transport and metabolism	70.1	1e-12
ColeSingleton3650	At1g08680	[T]	KOG0702	Signal transduction mechanisms	133	1e-31
ColeSingleton3651	At4g01710	[Z]	KOG3380	Cytoskeleton	55.1	3e-08
ColeSingleton3657	At2g41060	[R]	KOG0118	General function prediction only	126	5e-34
ColeSingleton3659	At2g20770	[V]	KOG2787	Defense mechanisms	61.2	5e-10
ColeSingleton3660	At3g06470	[I]	KOG3071	Lipid transport and metabolism	157	8e-39
ColeSingleton3662	At3g07020	[G]	KOG1192	Carbohydrate transport and metabolism	68.6	6e-12
ColeSingleton3662	At3g07020	[C]	KOG1192	Energy production and conversion	68.6	6e-12
ColeSingleton3666	At2g33410	[A]	KOG4205	RNA processing and modification	124	4e-29
ColeSingleton3667	At3g54300	[U]	KOG0859	Intracellular trafficking, secretion, and vesicular transport	55.5	3e-08
ColeSingleton3680	At1g04120	[Q]	KOG0054	Secondary metabolites biosynthesis, transport and catabolism	48.5	3e-06
ColeSingleton3684	At4g14940	[Q]	KOG1186	Secondary metabolites biosynthesis, transport and catabolism	50.8	6e-07
ColeSingleton3688	At4g38150	[R]	KOG4197	General function prediction only	105	6e-25
ColeSingleton3695	At5g26860	[O]	KOG2004	Posttranslational modification, protein turnover, chaperones	115	3e-26
ColeSingleton3701	At5g08030	[C]	KOG2258	Energy production and conversion	50.4	1e-08
ColeSingleton3702	CE24843	[Z]	KOG1376	Cytoskeleton	112	2e-25
ColeSingleton3710	At5g08560	[S]	KOG0293	Function unknown	70.5	8e-13
ColeSingleton3712	At2g13940	[R]	KOG0017	General function prediction only	47	9e-06
ColeSingleton3724	At5g61830	[Q]	KOG1208	Secondary metabolites biosynthesis, transport and catabolism	94.4	6e-30
ColeSingleton3731	At4g30600	[U]	KOG0781	Intracellular trafficking, secretion, and vesicular transport	40.4	3e-06
ColeSingleton3744	At5g60390	[J]	KOG0052	Translation, ribosomal structure and biogenesis	126	2e-39
ColeSingleton3752	At2g41700	[I]	KOG0059	Lipid transport and metabolism	60.8	6e-10
ColeSingleton3752	At2g41700	[R]	KOG0059	General function prediction only	60.8	6e-10
ColeSingleton3754	At1g25280	[R]	KOG2502	General function prediction only	70.9	1e-13
ColeSingleton3756	At2g15430	[K]	KOG1522	Transcription	84.7	4e-17
ColeSingleton3758	At3g59820	[S]	KOG1043	Function unknown	63.5	1e-10
ColeSingleton3759	At2g46560	[R]	KOG1064	General function prediction only	90.1	1e-18
ColeSingleton3762	At2g32730	[O]	KOG2062	Posttranslational modification, protein turnover, chaperones	111	4e-25
ColeSingleton3777	At1g65440	[A]	KOG1856	RNA processing and modification	72.8	2e-13
ColeSingleton3783	At3g62360	[O]	KOG1948	Posttranslational modification, protein turnover, chaperones	81.3	1e-19
ColeSingleton3784	At4g33180	[R]	KOG1454	General function prediction only	38.1	3e-07
ColeSingleton3785	7291662	[R]	KOG1721	General function prediction only	53.5	1e-07
ColeSingleton3786	At5g13520	[I]	KOG1047	Lipid transport and metabolism	57	9e-09
ColeSingleton3786	At5g13520	[O]	KOG1047	Posttranslational modification, protein turnover, chaperones	57	9e-09
ColeSingleton3786	At5g13520	[V]	KOG1047	Defense mechanisms	57	9e-09
ColeSingleton3786	At5g13520	[E]	KOG1047	Amino acid transport and metabolism	57	9e-09
ColeSingleton3788	At1g09450	[D]	KOG2464	Cell cycle control, cell division, chromosome partitioning	79.3	2e-15
ColeSingleton3790	At2g30440	[O]	KOG0171	Posttranslational modification, protein turnover, chaperones	129	7e-35
ColeSingleton3792	At5g23980	[P]	KOG0039	Inorganic ion transport and metabolism	90.1	1e-18
ColeSingleton3792	At5g23980	[Q]	KOG0039	Secondary metabolites biosynthesis, transport and catabolism	90.1	1e-18
ColeSingleton3796	At4g04410	[R]	KOG0017	General function prediction only	93.2	1e-19
ColeSingleton3812	At2g17910	[R]	KOG1075	General function prediction only	65.1	3e-11
ColeSingleton3818	At1g55860	[O]	KOG0939	Posttranslational modification, protein turnover, chaperones	182	9e-56
ColeSingleton3818	At1g55860	[K]	KOG0939	Transcription	182	9e-56
ColeSingleton3824	At1g14300	[S]	KOG2973	Function unknown	135	3e-32
ColeSingleton3832	At3g13530	[T]	KOG0198	Signal transduction mechanisms	72.8	2e-13
ColeSingleton3833	At5g60390	[J]	KOG0052	Translation, ribosomal structure and biogenesis	270	1e-72
ColeSingleton3844	At1g77810	[G]	KOG2288	Carbohydrate transport and metabolism	47.4	9e-06
ColeSingleton3846	At3g18490	[O]	KOG1339	Posttranslational modification, protein turnover, chaperones	60.1	7e-11
ColeSingleton3847	SPAPB1E7.04c	[M]	KOG4701	Cell wall/membrane/envelope biogenesis	74.7	9e-14
ColeSingleton3850	At3g24200	[H]	KOG3855	Coenzyme transport and metabolism	71.6	4e-30
ColeSingleton3850	At3g24200	[C]	KOG3855	Energy production and conversion	71.6	4e-30
ColeSingleton3858	At4g00450	[K]	KOG4522	Transcription	70.5	8e-13
ColeSingleton3860	At3g31970	[R]	KOG0017	General function prediction only	58.5	3e-09
ColeSingleton3862	At5g54800	[G]	KOG1441	Carbohydrate transport and metabolism	68.6	3e-12
ColeSingleton3862	At5g54800	[E]	KOG1441	Amino acid transport and metabolism	68.6	3e-12
ColeSingleton3868	At5g38840	[R]	KOG1881	General function prediction only	143	9e-35
ColeSingleton3870	At1g49600	[R]	KOG0118	General function prediction only	96.3	1e-20
ColeSingleton3902	At3g10350	[P]	KOG2825	Inorganic ion transport and metabolism	91.7	3e-19
ColeSingleton3904	At1g17680	[K]	KOG2076	Transcription	58.5	1e-14
ColeSingleton3908	At4g04210	[Y]	KOG2086	Nuclear structure	120	7e-28
ColeSingleton3911	At3g14270	[T]	KOG0230	Signal transduction mechanisms	159	2e-39
ColeSingleton3913	At3g13330	[S]	KOG1851	Function unknown	87.4	6e-18
ColeSingleton3914	At5g57130	[O]	KOG1051	Posttranslational modification, protein turnover, chaperones	54.7	5e-08
ColeSingleton3917	At3g44530	[D]	KOG0973	Cell cycle control, cell division, chromosome partitioning	59.7	5e-16
ColeSingleton3917	At3g44530	[K]	KOG0973	Transcription	59.7	5e-16
ColeSingleton3930	At1g78900	[C]	KOG1352	Energy production and conversion	63.2	2e-19
ColeSingleton3948	At5g60040	[K]	KOG0261	Transcription	125	2e-29
ColeSingleton3965	At3g10270	[B]	KOG0355	Chromatin structure and dynamics	99.4	2e-21
ColeSingleton3985	At4g18760	[R]	KOG0619	General function prediction only	141	4e-34
ColeSingleton3996	At1g75020	[I]	KOG1505	Lipid transport and metabolism	117	4e-27
ColeSingleton3999	At3g10360	[J]	KOG1488	Translation, ribosomal structure and biogenesis	177	5e-45
ColeSingleton4000	At1g06410	[G]	KOG1050	Carbohydrate transport and metabolism	70.1	2e-21
ColeSingleton4005	At1g01630	[I]	KOG1470	Lipid transport and metabolism	48.9	2e-06
ColeSingleton4008	At3g58560	[K]	KOG0620	Transcription	105	2e-23
ColeSingleton4012	At4g36760	[E]	KOG2413	Amino acid transport and metabolism	145	2e-35
ColeSingleton4017	At1g28010	[Q]	KOG0055	Secondary metabolites biosynthesis, transport and catabolism	186	1e-47
ColeSingleton4025	At3g11540	[G]	KOG4626	Carbohydrate transport and metabolism	58.9	2e-11
ColeSingleton4025	At3g11540	[O]	KOG4626	Posttranslational modification, protein turnover, chaperones	58.9	2e-11
ColeSingleton4025	At3g11540	[T]	KOG4626	Signal transduction mechanisms	58.9	2e-11
ColeSingleton4031	At5g43810	[J]	KOG1041	Translation, ribosomal structure and biogenesis	218	2e-57
ColeSingleton4035	Hs4758788	[C]	KOG1713	Energy production and conversion	69.7	1e-12
ColeSingleton4046	At5g42150	[R]	KOG3029	General function prediction only	99	2e-21
ColeSingleton4048	At5g63110	[B]	KOG1342	Chromatin structure and dynamics	47	9e-06
ColeSingleton4050	At1g49670_1	[I]	KOG4169	Lipid transport and metabolism	70.5	4e-19
ColeSingleton4050	At1g49670_1	[R]	KOG4169	General function prediction only	70.5	4e-19
ColeSingleton4051	At3g51550	[T]	KOG1187	Signal transduction mechanisms	79	3e-21
ColeSingleton4055	SPBC17G9.11c	[C]	KOG0369	Energy production and conversion	62.4	2e-10
ColeSingleton4061	At3g19080	[K]	KOG1946	Transcription	70.1	1e-12
ColeSingleton4078	At5g15410	[P]	KOG0498	Inorganic ion transport and metabolism	48.5	3e-06
ColeSingleton4078	At5g15410	[T]	KOG0498	Signal transduction mechanisms	48.5	3e-06
ColeSingleton4084	At5g43060_2	[T]	KOG4296	Signal transduction mechanisms	48.5	3e-06
ColeSingleton4086	At1g27350	[S]	KOG3491	Function unknown	51.2	5e-07
ColeSingleton4090	At3g63070	[K]	KOG1904	Transcription	90.5	8e-19
ColeSingleton4093	At3g61580	[I]	KOG4232	Lipid transport and metabolism	171	1e-42
ColeSingleton4096	At1g79550	[G]	KOG1367	Carbohydrate transport and metabolism	181	5e-46
ColeSingleton4099	7290870	[K]	KOG1474	Transcription	54.3	6e-08
ColeSingleton4103	YDL191w	[J]	KOG3436	Translation, ribosomal structure and biogenesis	64.7	1e-18
ColeSingleton4109	At1g18690	[G]	KOG4748	Carbohydrate transport and metabolism	62.8	3e-10
ColeSingleton4109	At1g18690	[M]	KOG4748	Cell wall/membrane/envelope biogenesis	62.8	3e-10
ColeSingleton4111	At3g62770	[S]	KOG2111	Function unknown	144	4e-41
ColeSingleton4127	At1g04780	[R]	KOG0522	General function prediction only	46.6	2e-08
ColeSingleton4129	At5g17250	[T]	KOG2126	Signal transduction mechanisms	68.2	4e-12
ColeSingleton4134	At4g37050	[I]	KOG0513	Lipid transport and metabolism	91.7	4e-19
ColeSingleton4135	At5g14310	[V]	KOG1515	Defense mechanisms	144	9e-35
ColeSingleton4140	At3g58510	[A]	KOG0335	RNA processing and modification	115	2e-26
ColeSingleton4145	At5g51200	[S]	KOG1835	Function unknown	144	6e-35
ColeSingleton4146	At1g11740	[R]	KOG0522	General function prediction only	62.4	2e-10
ColeSingleton4153	At5g67260	[D]	KOG0656	Cell cycle control, cell division, chromosome partitioning	95.9	2e-23
ColeSingleton4156	At4g39050	[Z]	KOG0242	Cytoskeleton	57.8	5e-09
ColeSingleton4158	At1g15080	[I]	KOG3030	Lipid transport and metabolism	68.2	1e-17
ColeSingleton4162	At3g02660	[J]	KOG2623	Translation, ribosomal structure and biogenesis	216	5e-61
ColeSingleton4166	At2g17490	[R]	KOG0017	General function prediction only	61.6	3e-11
ColeSingleton4174	At3g26810	[R]	KOG1947	General function prediction only	54.3	6e-08
ColeSingleton4179	At5g13110	[G]	KOG0563	Carbohydrate transport and metabolism	90.9	6e-19
ColeSingleton4189	7293932	[C]	KOG1335	Energy production and conversion	61.6	4e-10
ColeSingleton4190	At1g53470	[M]	KOG4629	Cell wall/membrane/envelope biogenesis	135	2e-32
ColeSingleton4195	At4g18050	[Q]	KOG0055	Secondary metabolites biosynthesis, transport and catabolism	112	2e-25
ColeSingleton4201	At5g49470	[T]	KOG0192	Signal transduction mechanisms	54.7	5e-08
ColeSingleton4202	At1g50310	[R]	KOG0254	General function prediction only	121	5e-28
ColeSingleton4204	At2g37730	[G]	KOG2246	Carbohydrate transport and metabolism	83.6	9e-17
ColeSingleton4211	At5g26850	[R]	KOG1877	General function prediction only	126	1e-29
ColeSingleton4215	At5g08450	[S]	KOG4843	Function unknown	78.6	6e-15
ColeSingleton4217	At2g33740	[P]	KOG3338	Inorganic ion transport and metabolism	47	9e-06
ColeSingleton4219	At3g53120	[S]	KOG3270	Function unknown	63.5	4e-17
ColeSingleton4222	At2g26560	[I]	KOG0513	Lipid transport and metabolism	141	4e-34
ColeSingleton4223	At3g60170	[R]	KOG0017	General function prediction only	48.1	4e-06
ColeSingleton4228	At1g77990	[P]	KOG0236	Inorganic ion transport and metabolism	36.2	1e-08
ColeSingleton4229	At5g27280	[S]	KOG3277	Function unknown	65.9	2e-11
ColeSingleton4230	At5g53940	[R]	KOG3399	General function prediction only	55.1	3e-15
ColeSingleton4231	At4g36850	[S]	KOG2913	Function unknown	60.1	7e-13
ColeSingleton4243	At2g36910	[Q]	KOG0055	Secondary metabolites biosynthesis, transport and catabolism	149	2e-36
ColeSingleton4246	At2g46010	[B]	KOG0386	Chromatin structure and dynamics	268	4e-72
ColeSingleton4246	At2g46010	[K]	KOG0386	Transcription	268	4e-72
ColeSingleton4250	At3g56640	[U]	KOG2176	Intracellular trafficking, secretion, and vesicular transport	114	5e-26
ColeSingleton4259	At1g60650	[R]	KOG0118	General function prediction only	81.6	3e-16
ColeSingleton4271	At2g17200	[O]	KOG0010	Posttranslational modification, protein turnover, chaperones	58.9	3e-09
ColeSingleton4271	At2g17200	[R]	KOG0010	General function prediction only	58.9	3e-09
ColeSingleton4276	At4g17360	[G]	KOG3076	Carbohydrate transport and metabolism	120	7e-29
ColeSingleton4292	At3g60170	[R]	KOG0017	General function prediction only	90.1	1e-18
ColeSingleton4293	At2g24200	[R]	KOG2597	General function prediction only	117	7e-27
ColeSingleton4297	At4g39110	[T]	KOG1187	Signal transduction mechanisms	82	3e-23
ColeSingleton4307	At5g67320	[B]	KOG0273	Chromatin structure and dynamics	108	9e-25
ColeSingleton4317	At3g14460	[T]	KOG4658	Signal transduction mechanisms	86.7	7e-22
ColeSingleton4321	At2g16790	[G]	KOG3354	Carbohydrate transport and metabolism	57.8	2e-19
ColeSingleton4324	At5g19820	[Y]	KOG2171	Nuclear structure	214	3e-56
ColeSingleton4324	At5g19820	[U]	KOG2171	Intracellular trafficking, secretion, and vesicular transport	214	3e-56
ColeSingleton4328	At4g37670	[E]	KOG2436	Amino acid transport and metabolism	59.3	3e-16
ColeSingleton4333	At5g22480	[R]	KOG2703	General function prediction only	69.7	2e-12
ColeSingleton4335	At4g32280_2	[T]	KOG0251	Signal transduction mechanisms	199	3e-51
ColeSingleton4335	At4g32280_2	[U]	KOG0251	Intracellular trafficking, secretion, and vesicular transport	199	3e-51
ColeSingleton4342	At2g04490	[R]	KOG0017	General function prediction only	52.8	3e-07
ColeSingleton4343	At4g01070	[G]	KOG1192	Carbohydrate transport and metabolism	43.1	1e-07
ColeSingleton4343	At4g01070	[C]	KOG1192	Energy production and conversion	43.1	1e-07
ColeSingleton4355	At5g51180	[R]	KOG4372	General function prediction only	56.6	1e-08
ColeSingleton4357	At5g43500	[Z]	KOG0797	Cytoskeleton	103	8e-23
ColeSingleton4360	At5g11710	[F]	KOG2056	Nucleotide transport and metabolism	73.6	2e-13
ColeSingleton4361	At4g00900	[P]	KOG0202	Inorganic ion transport and metabolism	117	3e-32
ColeSingleton4364	At2g06950	[R]	KOG0017	General function prediction only	73.6	4e-20
ColeSingleton4366	At4g34390	[D]	KOG0082	Cell cycle control, cell division, chromosome partitioning	63.5	1e-10
ColeSingleton4366	At4g34390	[T]	KOG0082	Signal transduction mechanisms	63.5	1e-10
ColeSingleton4387	At2g28090	[P]	KOG1603	Inorganic ion transport and metabolism	49.7	4e-11
ColeSingleton4388	At2g04670	[R]	KOG0017	General function prediction only	75.1	3e-14
ColeSingleton4408	At5g18230	[K]	KOG2150	Transcription	49.3	4e-06
ColeSingleton4409	At5g05790	[O]	KOG0724	Posttranslational modification, protein turnover, chaperones	156	2e-38
ColeSingleton4414	7295039	[T]	KOG1925	Signal transduction mechanisms	48.9	2e-06
ColeSingleton4414	7295039	[Z]	KOG1925	Cytoskeleton	48.9	2e-06
ColeSingleton4419	At1g63220	[R]	KOG1030	General function prediction only	50.1	1e-06
ColeSingleton4421	At3g24570	[R]	KOG1944	General function prediction only	174	5e-44
ColeSingleton4422	At3g09390	[P]	KOG4738	Inorganic ion transport and metabolism	36.6	2e-06
ColeSingleton4425	At4g39910	[O]	KOG1864	Posttranslational modification, protein turnover, chaperones	54.7	9e-17
ColeSingleton4429	At4g01370	[T]	KOG0660	Signal transduction mechanisms	187	2e-52
ColeSingleton4436	At4g33090	[E]	KOG1046	Amino acid transport and metabolism	76.6	2e-14
ColeSingleton4436	At4g33090	[O]	KOG1046	Posttranslational modification, protein turnover, chaperones	76.6	2e-14
ColeSingleton4446	At4g34880	[J]	KOG1211	Translation, ribosomal structure and biogenesis	47.8	1e-13
ColeSingleton4449	At2g02970	[F]	KOG1386	Nucleotide transport and metabolism	178	6e-45
ColeSingleton4458	At4g34200	[E]	KOG0068	Amino acid transport and metabolism	231	3e-61
ColeSingleton4462	At1g02840	[A]	KOG0105	RNA processing and modification	71.6	4e-13
ColeSingleton4468	At1g20410	[J]	KOG2364	Translation, ribosomal structure and biogenesis	133	1e-31
ColeSingleton4469	At1g20570_1	[R]	KOG2978	General function prediction only	151	2e-51
ColeSingleton4474	At2g16710	[P]	KOG1120	Inorganic ion transport and metabolism	153	2e-46
ColeSingleton4476	At5g61440	[O]	KOG0907	Posttranslational modification, protein turnover, chaperones	60.8	6e-10
ColeSingleton4483	At4g00060	[L]	KOG1906	Replication, recombination and repair	59.7	1e-09
ColeSingleton4488	At5g11430	[K]	KOG1634	Transcription	124	1e-28
ColeSingleton4489	At5g03030	[O]	KOG0723	Posttranslational modification, protein turnover, chaperones	80.5	2e-21
ColeSingleton4494	At3g45520	[R]	KOG0017	General function prediction only	52.4	4e-07
ColeSingleton4495	At4g08830	[R]	KOG1075	General function prediction only	60.1	2e-09
ColeSingleton4496	At5g17990	[E]	KOG1438	Amino acid transport and metabolism	123	1e-28
ColeSingleton4499	At3g07800	[F]	KOG3125	Nucleotide transport and metabolism	68.2	6e-15
ColeSingleton4506	At5g58430	[U]	KOG2344	Intracellular trafficking, secretion, and vesicular transport	138	4e-64
ColeSingleton4511	At5g57500	[G]	KOG2287	Carbohydrate transport and metabolism	131	1e-34
ColeSingleton4513	At3g45850	[Z]	KOG0243	Cytoskeleton	52	3e-07
ColeSingleton4518	At5g07300	[T]	KOG1327	Signal transduction mechanisms	170	6e-60
ColeSingleton4525	At1g17340	[I]	KOG1888	Lipid transport and metabolism	167	9e-42
ColeSingleton4532	At1g20050	[I]	KOG4826	Lipid transport and metabolism	140	5e-46
ColeSingleton4537	At1g07420	[I]	KOG0873	Lipid transport and metabolism	99.8	1e-21
ColeSingleton4542	At1g68940	[S]	KOG0167	Function unknown	55.8	2e-08
ColeSingleton4553	At5g64440	[J]	KOG1211	Translation, ribosomal structure and biogenesis	114	7e-26
ColeSingleton4564	At1g02850	[G]	KOG0626	Carbohydrate transport and metabolism	49.3	2e-06
ColeSingleton4567	At4g39390	[G]	KOG1441	Carbohydrate transport and metabolism	207	7e-54
ColeSingleton4567	At4g39390	[E]	KOG1441	Amino acid transport and metabolism	207	7e-54
ColeSingleton4568	At5g16280	[D]	KOG1938	Cell cycle control, cell division, chromosome partitioning	63.2	6e-13
ColeSingleton4570	At2g29890	[Z]	KOG0443	Cytoskeleton	65.1	3e-11
ColeSingleton4573	At1g54280	[R]	KOG0206	General function prediction only	165	1e-53
ColeSingleton4574	At4g26260	[R]	KOG1573	General function prediction only	162	3e-40
ColeSingleton4575	At4g09570	[T]	KOG0032	Signal transduction mechanisms	120	9e-28
ColeSingleton4583	At3g53880	[R]	KOG1577	General function prediction only	51.2	8e-07
ColeSingleton4598	At2g19600	[P]	KOG1650	Inorganic ion transport and metabolism	152	3e-49
ColeSingleton4601	At4g02470	[O]	KOG0737	Posttranslational modification, protein turnover, chaperones	65.9	2e-11
ColeSingleton4602	At4g04340	[R]	KOG1134	General function prediction only	127	2e-29
ColeSingleton4603	At3g11050	[P]	KOG2332	Inorganic ion transport and metabolism	59.3	2e-09
ColeSingleton4605	At3g17700	[P]	KOG0498	Inorganic ion transport and metabolism	104	1e-22
ColeSingleton4605	At3g17700	[T]	KOG0498	Signal transduction mechanisms	104	1e-22
ColeSingleton4608	At1g65430	[O]	KOG1815	Posttranslational modification, protein turnover, chaperones	291	3e-79
ColeSingleton4610	At3g46450	[I]	KOG1471	Lipid transport and metabolism	61.6	8e-13
ColeSingleton4617	At4g17450	[R]	KOG0017	General function prediction only	66.2	2e-19
ColeSingleton4618	At5g09410	[S]	KOG0520	Function unknown	74.3	6e-14
ColeSingleton4619	At5g49020	[O]	KOG1500	Posttranslational modification, protein turnover, chaperones	65.1	3e-11
ColeSingleton4619	At5g49020	[K]	KOG1500	Transcription	65.1	3e-11
ColeSingleton4622	At5g50390	[R]	KOG4197	General function prediction only	173	1e-43
ColeSingleton4631	At5g38710	[E]	KOG0186	Amino acid transport and metabolism	58.9	2e-09
ColeSingleton4653	At3g59140	[Q]	KOG0054	Secondary metabolites biosynthesis, transport and catabolism	110	1e-24
ColeSingleton4667	At2g32700	[R]	KOG0266	General function prediction only	170	7e-43
ColeSingleton4668	At3g11420	[G]	KOG2246	Carbohydrate transport and metabolism	117	4e-27
ColeSingleton4670	At1g58080	[E]	KOG2831	Amino acid transport and metabolism	50.1	1e-06
ColeSingleton4680	At2g21310	[R]	KOG0017	General function prediction only	50.8	6e-07
ColeSingleton4683	Hs14149665	[K]	KOG1874	Transcription	50.1	1e-06
ColeSingleton4684	At1g56210	[P]	KOG1603	Inorganic ion transport and metabolism	72.8	3e-13
ColeSingleton4685	At2g43130	[U]	KOG0087	Intracellular trafficking, secretion, and vesicular transport	63.9	1e-15
ColeSingleton4689	At4g01370	[T]	KOG0660	Signal transduction mechanisms	65.5	3e-11
ColeSingleton4693	At5g45130	[U]	KOG0092	Intracellular trafficking, secretion, and vesicular transport	45.8	1e-10
ColeSingleton4699	At4g01880	[S]	KOG2811	Function unknown	68.2	1e-19
ColeSingleton4700	At2g46560	[R]	KOG1064	General function prediction only	194	5e-50
ColeSingleton4709	At1g80950	[I]	KOG4666	Lipid transport and metabolism	75.5	6e-14
ColeSingleton4710	AtMi006	[C]	KOG1713	Energy production and conversion	97.4	2e-22
ColeSingleton4713	At3g59530	[R]	KOG1520	General function prediction only	186	2e-47
ColeSingleton4723	At3g53180	[E]	KOG0683	Amino acid transport and metabolism	90.1	2e-18
ColeSingleton4730	At5g49980	[R]	KOG1947	General function prediction only	53.9	8e-08
ColeSingleton4732	At3g59660	[S]	KOG1032	Function unknown	222	2e-58
ColeSingleton4736	At3g04920	[J]	KOG3424	Translation, ribosomal structure and biogenesis	66.6	2e-20
ColeSingleton4743	At5g59240	[J]	KOG3283	Translation, ribosomal structure and biogenesis	61.6	4e-10
ColeSingleton4765	At2g33530	[O]	KOG1282	Posttranslational modification, protein turnover, chaperones	84.7	4e-17
ColeSingleton4765	At2g33530	[E]	KOG1282	Amino acid transport and metabolism	84.7	4e-17
ColeSingleton4773	At5g18420	[S]	KOG4508	Function unknown	103	5e-35
ColeSingleton4780	At3g59540	[J]	KOG3499	Translation, ribosomal structure and biogenesis	70.9	1e-19
ColeSingleton4783	At5g21040	[R]	KOG0274	General function prediction only	193	2e-49
ColeSingleton4787	At5g07250	[T]	KOG2289	Signal transduction mechanisms	144	3e-35
ColeSingleton4800	At4g32720	[R]	KOG0118	General function prediction only	56.6	2e-08
ColeSingleton4804	CE09692	[Z]	KOG1376	Cytoskeleton	112	9e-46
ColeSingleton4805	At5g13000	[M]	KOG0916	Cell wall/membrane/envelope biogenesis	181	8e-46
ColeSingleton4809	At5g63980	[F]	KOG1528	Nucleotide transport and metabolism	120	6e-30
ColeSingleton4809	At5g63980	[P]	KOG1528	Inorganic ion transport and metabolism	120	6e-30
ColeSingleton4818	At1g44910	[A]	KOG0152	RNA processing and modification	73.6	2e-13
ColeSingleton4823	At4g28700	[P]	KOG0682	Inorganic ion transport and metabolism	208	2e-54
ColeSingleton4825	At2g39840	[T]	KOG0374	Signal transduction mechanisms	269	4e-74
ColeSingleton4825	At2g39840	[R]	KOG0374	General function prediction only	269	4e-74
ColeSingleton4832	At3g15380	[I]	KOG1362	Lipid transport and metabolism	52.4	2e-07
ColeSingleton4835	At3g15390	[L]	KOG2401	Replication, recombination and repair	71.2	1e-12
ColeSingleton4848	At1g31480	[I]	KOG2308	Lipid transport and metabolism	65.1	3e-11
ColeSingleton4848	At1g31480	[U]	KOG2308	Intracellular trafficking, secretion, and vesicular transport	65.1	3e-11
ColeSingleton4860	At4g37640	[P]	KOG0204	Inorganic ion transport and metabolism	94.4	5e-20
ColeSingleton4861	At4g20330	[K]	KOG3095	Transcription	144	1e-52
ColeSingleton4882	SPCC1906.01	[M]	KOG1322	Cell wall/membrane/envelope biogenesis	188	4e-48
ColeSingleton4887	At1g58140	[R]	KOG0017	General function prediction only	86.7	1e-17
ColeSingleton4893	At3g12100	[P]	KOG1484	Inorganic ion transport and metabolism	60.5	4e-17
ColeSingleton4898	At4g16740_2	[G]	KOG1021	Carbohydrate transport and metabolism	44.7	1e-09
ColeSingleton4898	At4g16740_2	[M]	KOG1021	Cell wall/membrane/envelope biogenesis	44.7	1e-09
ColeSingleton4898	At4g16740_2	[W]	KOG1021	Extracellular structures	44.7	1e-09
ColeSingleton4900	At5g03330	[T]	KOG2605	Signal transduction mechanisms	51.2	2e-10
ColeSingleton4900	At5g03330	[O]	KOG2605	Posttranslational modification, protein turnover, chaperones	51.2	2e-10
ColeSingleton4902	At4g22360	[K]	KOG1946	Transcription	114	2e-25
ColeSingleton4904	At1g75210	[F]	KOG2469	Nucleotide transport and metabolism	103	8e-23
ColeSingleton4912	At2g47500	[Z]	KOG0239	Cytoskeleton	156	1e-38
ColeSingleton4914	At3g14790	[G]	KOG0747	Carbohydrate transport and metabolism	189	7e-90
ColeSingleton4922	At3g61480	[R]	KOG2006	General function prediction only	215	2e-56
ColeSingleton4927	At3g11540	[G]	KOG4626	Carbohydrate transport and metabolism	130	1e-30
ColeSingleton4927	At3g11540	[O]	KOG4626	Posttranslational modification, protein turnover, chaperones	130	1e-30
ColeSingleton4927	At3g11540	[T]	KOG4626	Signal transduction mechanisms	130	1e-30
ColeSingleton4934	At5g14040	[C]	KOG0767	Energy production and conversion	108	4e-24
ColeSingleton4936	At3g03740	[D]	KOG1987	Cell cycle control, cell division, chromosome partitioning	57.4	4e-09
ColeSingleton4936	At3g03740	[R]	KOG1987	General function prediction only	57.4	4e-09
ColeSingleton4938	At5g53940	[R]	KOG3399	General function prediction only	73.2	1e-13
ColeSingleton4947	At1g04860	[O]	KOG1873	Posttranslational modification, protein turnover, chaperones	50.4	2e-06
ColeSingleton4954	At1g24360	[I]	KOG1200	Lipid transport and metabolism	53.9	2e-08
ColeSingleton4957	At1g74040	[E]	KOG2367	Amino acid transport and metabolism	48.5	3e-06
ColeSingleton4962	At3g25410	[P]	KOG2718	Inorganic ion transport and metabolism	95.5	4e-20
ColeSingleton4971	At1g17980	[A]	KOG2245	RNA processing and modification	106	2e-42
ColeSingleton4993	At1g07080	[O]	KOG3160	Posttranslational modification, protein turnover, chaperones	152	3e-37
ColeSingleton4997	At1g01750	[Z]	KOG1735	Cytoskeleton	76.6	1e-14
ColeSingleton5007	At3g57080	[K]	KOG3218	Transcription	95.1	9e-22
ColeSingleton5008	At3g04720	[R]	KOG4742	General function prediction only	153	1e-37
ColeSingleton5009	At2g36480	[A]	KOG2071	RNA processing and modification	60.8	8e-10
ColeSingleton5022	At2g28760	[G]	KOG1429	Carbohydrate transport and metabolism	100	7e-22
ColeSingleton5022	At2g28760	[M]	KOG1429	Cell wall/membrane/envelope biogenesis	100	7e-22
ColeSingleton5023	At4g28510	[O]	KOG3090	Posttranslational modification, protein turnover, chaperones	54.7	5e-08
ColeSingleton5025	At5g23720	[V]	KOG1716	Defense mechanisms	124	1e-28
ColeSingleton5033	At1g69850	[E]	KOG1237	Amino acid transport and metabolism	145	4e-37
ColeSingleton5035	AtCh083	[C]	KOG4668	Energy production and conversion	59.7	2e-09
ColeSingleton5037	At4g25500	[A]	KOG0106	RNA processing and modification	186	8e-48
ColeSingleton5042	At4g32551	[R]	KOG0266	General function prediction only	147	5e-36
ColeSingleton5055	At1g52190	[E]	KOG1237	Amino acid transport and metabolism	60.8	7e-17
ColeSingleton5058	At4g21120	[E]	KOG1286	Amino acid transport and metabolism	89	2e-18
ColeSingleton5059	At2g31000	[T]	KOG0192	Signal transduction mechanisms	102	2e-24
ColeSingleton5064	At1g09930	[T]	KOG2262	Signal transduction mechanisms	83.2	1e-16
ColeSingleton5068	At1g47128_2	[T]	KOG4296	Signal transduction mechanisms	71.2	6e-14
ColeSingleton5074	At2g45120	[R]	KOG1721	General function prediction only	60.8	6e-10
ColeSingleton5076	At3g06530	[S]	KOG1837	Function unknown	87.8	2e-21
ColeSingleton5083	At2g01690	[S]	KOG0212	Function unknown	65.9	2e-11
ColeSingleton5092	At2g36910	[Q]	KOG0055	Secondary metabolites biosynthesis, transport and catabolism	164	4e-41
ColeSingleton5097	At5g16710_1	[P]	KOG1422	Inorganic ion transport and metabolism	50.4	7e-11
ColeSingleton5100	At1g11160	[D]	KOG0267	Cell cycle control, cell division, chromosome partitioning	51.6	7e-07
ColeSingleton5101	At5g24430	[T]	KOG0032	Signal transduction mechanisms	76.3	1e-14
ColeSingleton5103	At3g57150	[J]	KOG2529	Translation, ribosomal structure and biogenesis	231	3e-61
ColeSingleton5109	At5g58030	[U]	KOG3315	Intracellular trafficking, secretion, and vesicular transport	209	3e-54
ColeSingleton5110	At5g07900	[K]	KOG1267	Transcription	49.7	1e-06
ColeSingleton5110	At5g07900	[R]	KOG1267	General function prediction only	49.7	1e-06
ColeSingleton5117	At5g66060	[E]	KOG1591	Amino acid transport and metabolism	87.8	5e-18
ColeSingleton5122	At3g06350	[E]	KOG0692	Amino acid transport and metabolism	98.2	6e-21
ColeSingleton5126	At3g11910	[O]	KOG1863	Posttranslational modification, protein turnover, chaperones	72.8	2e-13
ColeSingleton5128	At1g68570	[E]	KOG1237	Amino acid transport and metabolism	128	6e-48
ColeSingleton5138	At5g64420	[K]	KOG1926	Transcription	129	5e-35
ColeSingleton5140	At3g49500	[A]	KOG0988	RNA processing and modification	122	2e-28
ColeSingleton5153	Hs16507198	[R]	KOG4722	General function prediction only	83.6	2e-16
ColeSingleton5163	At2g36380	[Q]	KOG0065	Secondary metabolites biosynthesis, transport and catabolism	80.5	8e-16
ColeSingleton5167	At5g35410	[T]	KOG0583	Signal transduction mechanisms	251	4e-67
ColeSingleton5178	At3g24080	[J]	KOG2409	Translation, ribosomal structure and biogenesis	53.5	1e-07
ColeSingleton5180	SPBP8B7.06	[J]	KOG3449	Translation, ribosomal structure and biogenesis	108	6e-24
ColeSingleton5184	At1g49180_1	[O]	KOG0595	Posttranslational modification, protein turnover, chaperones	92	3e-19
ColeSingleton5184	At1g49180_1	[U]	KOG0595	Intracellular trafficking, secretion, and vesicular transport	92	3e-19
ColeSingleton5184	At1g49180_1	[T]	KOG0595	Signal transduction mechanisms	92	3e-19
ColeSingleton5196	At4g28900	[R]	KOG0017	General function prediction only	58.9	2e-09
ColeSingleton5199	At1g14850	[Y]	KOG1900	Nuclear structure	117	3e-27
ColeSingleton5199	At1g14850	[U]	KOG1900	Intracellular trafficking, secretion, and vesicular transport	117	3e-27
ColeSingleton5203	At5g23310	[P]	KOG0876	Inorganic ion transport and metabolism	89.7	1e-18
ColeSingleton5210	At5g05820	[G]	KOG1441	Carbohydrate transport and metabolism	70.5	8e-13
ColeSingleton5210	At5g05820	[E]	KOG1441	Amino acid transport and metabolism	70.5	8e-13
ColeSingleton5212	At2g47850	[R]	KOG1677	General function prediction only	85.5	4e-17
ColeSingleton5214	At1g18340_2	[R]	KOG2488	General function prediction only	149	2e-36
ColeSingleton5216	At5g17930	[T]	KOG2141	Signal transduction mechanisms	72	3e-13
ColeSingleton5227	At5g35200	[T]	KOG0251	Signal transduction mechanisms	82.8	1e-29
ColeSingleton5227	At5g35200	[U]	KOG0251	Intracellular trafficking, secretion, and vesicular transport	82.8	1e-29
ColeSingleton5239	At4g22130	[T]	KOG1187	Signal transduction mechanisms	220	5e-61
ColeSingleton5243	At3g20740	[K]	KOG1034	Transcription	155	6e-44
ColeSingleton5250	At1g11160	[D]	KOG0267	Cell cycle control, cell division, chromosome partitioning	50.8	4e-11
ColeSingleton5251	At5g56130	[S]	KOG1407	Function unknown	97.4	6e-21
ColeSingleton5257	At4g33090	[E]	KOG1046	Amino acid transport and metabolism	93.6	1e-19
ColeSingleton5257	At4g33090	[O]	KOG1046	Posttranslational modification, protein turnover, chaperones	93.6	1e-19
ColeSingleton5265	At1g37200	[R]	KOG0017	General function prediction only	47	6e-08
ColeSingleton5267	At5g26250	[R]	KOG0254	General function prediction only	160	4e-40
ColeSingleton5280	At3g60910	[E]	KOG2352	Amino acid transport and metabolism	143	1e-34
ColeSingleton5283	At4g37460	[R]	KOG1124	General function prediction only	158	3e-39
ColeSingleton5284	At2g21060	[J]	KOG3070	Translation, ribosomal structure and biogenesis	61.2	5e-10
ColeSingleton5285	At3g20530	[T]	KOG1187	Signal transduction mechanisms	90.1	1e-18
ColeSingleton5287	At2g24190	[Q]	KOG1208	Secondary metabolites biosynthesis, transport and catabolism	170	1e-42
ColeSingleton5289	At1g25280	[R]	KOG2502	General function prediction only	110	7e-25
ColeSingleton5297	At1g14980	[O]	KOG1641	Posttranslational modification, protein turnover, chaperones	155	3e-38
ColeSingleton5304	At3g59770	[I]	KOG1888	Lipid transport and metabolism	54.3	6e-08
ColeSingleton5305	At1g56440	[S]	KOG4648	Function unknown	86.3	2e-17
ColeSingleton5307	At2g31960	[M]	KOG0916	Cell wall/membrane/envelope biogenesis	120	1e-27
ColeSingleton5308	At1g16920	[U]	KOG0087	Intracellular trafficking, secretion, and vesicular transport	69.7	4e-16
ColeSingleton5332	At5g63980	[F]	KOG1528	Nucleotide transport and metabolism	141	3e-51
ColeSingleton5332	At5g63980	[P]	KOG1528	Inorganic ion transport and metabolism	141	3e-51
ColeSingleton5337	At1g63700	[T]	KOG0198	Signal transduction mechanisms	186	2e-47
ColeSingleton5340	At3g48930	[J]	KOG1728	Translation, ribosomal structure and biogenesis	41.6	2e-09
ColeSingleton5341	At5g13680	[K]	KOG1920	Transcription	177	9e-56
ColeSingleton5344	At1g50700	[T]	KOG0032	Signal transduction mechanisms	87.8	8e-18
ColeSingleton5346	At2g25170	[R]	KOG0383	General function prediction only	76.6	1e-21
ColeSingleton5351	At2g47110	[J]	KOG0004	Translation, ribosomal structure and biogenesis	64.3	6e-11
ColeSingleton5352	At5g66210	[T]	KOG0032	Signal transduction mechanisms	67.8	5e-12
ColeSingleton5355	At5g04240_1	[R]	KOG1246	General function prediction only	58.2	4e-09
ColeSingleton5357	At5g26150	[T]	KOG1187	Signal transduction mechanisms	63.9	7e-11
ColeSingleton5364	At1g67140	[S]	KOG1822	Function unknown	50.8	6e-07
ColeSingleton5378	At3g59820	[S]	KOG1043	Function unknown	76.6	1e-14
ColeSingleton5383	At2g40550	[S]	KOG2545	Function unknown	72	3e-13
ColeSingleton5384	At3g14690	[Q]	KOG0157	Secondary metabolites biosynthesis, transport and catabolism	48.5	4e-15
ColeSingleton5384	At3g14690	[I]	KOG0157	Lipid transport and metabolism	48.5	4e-15
ColeSingleton5387	At5g59290	[G]	KOG1429	Carbohydrate transport and metabolism	104	5e-23
ColeSingleton5387	At5g59290	[M]	KOG1429	Cell wall/membrane/envelope biogenesis	104	5e-23
ColeSingleton5395	AtCh070	[C]	KOG4668	Energy production and conversion	39.7	6e-07
ColeSingleton5406	At1g60490	[T]	KOG0906	Signal transduction mechanisms	78.6	3e-15
ColeSingleton5406	At1g60490	[U]	KOG0906	Intracellular trafficking, secretion, and vesicular transport	78.6	3e-15
ColeSingleton5411	At3g49910	[J]	KOG3401	Translation, ribosomal structure and biogenesis	126	1e-29
ColeSingleton5413	At2g15430	[K]	KOG1522	Transcription	204	6e-57
ColeSingleton5414	At3g54010	[O]	KOG0543	Posttranslational modification, protein turnover, chaperones	235	4e-62
ColeSingleton5415	At5g01510	[S]	KOG4249	Function unknown	78.2	7e-15
ColeSingleton5419	At2g35350	[T]	KOG0700	Signal transduction mechanisms	79	3e-15
ColeSingleton5422	At5g27950	[Z]	KOG0239	Cytoskeleton	217	1e-56
ColeSingleton5426	At5g64580	[O]	KOG0731	Posttranslational modification, protein turnover, chaperones	167	4e-42
ColeSingleton5430	Hs19718731	[K]	KOG1474	Transcription	58.5	4e-09
ColeSingleton5435	At2g46090	[I]	KOG1116	Lipid transport and metabolism	53.9	1e-07
ColeSingleton5435	At2g46090	[T]	KOG1116	Signal transduction mechanisms	53.9	1e-07
ColeSingleton5437	At3g13670	[T]	KOG1164	Signal transduction mechanisms	63.5	1e-10
ColeSingleton5438	At4g01400_1	[R]	KOG4197	General function prediction only	66.2	2e-11
ColeSingleton5443	At5g06680	[Z]	KOG2000	Cytoskeleton	52	4e-07
ColeSingleton5445	At4g13650	[R]	KOG4197	General function prediction only	160	8e-40
ColeSingleton5458	At4g00110	[M]	KOG1371	Cell wall/membrane/envelope biogenesis	224	4e-59
ColeSingleton5460	At3g57660	[K]	KOG0262	Transcription	107	6e-24
ColeSingleton5465	At5g50780	[D]	KOG1845	Cell cycle control, cell division, chromosome partitioning	160	6e-43
ColeSingleton5472	At2g21060	[J]	KOG3070	Translation, ribosomal structure and biogenesis	57.8	1e-08
ColeSingleton5485	At5g19130	[O]	KOG3566	Posttranslational modification, protein turnover, chaperones	95.5	2e-28
ColeSingleton5486	At2g46700	[T]	KOG0032	Signal transduction mechanisms	125	3e-29
ColeSingleton5490	At4g39650	[E]	KOG2410	Amino acid transport and metabolism	68.2	2e-14
ColeSingleton5497	At5g16210	[T]	KOG0211	Signal transduction mechanisms	147	7e-36
ColeSingleton5501	At4g38040	[G]	KOG1021	Carbohydrate transport and metabolism	72	2e-24
ColeSingleton5501	At4g38040	[M]	KOG1021	Cell wall/membrane/envelope biogenesis	72	2e-24
ColeSingleton5501	At4g38040	[W]	KOG1021	Extracellular structures	72	2e-24
ColeSingleton5511	At3g06300	[E]	KOG1591	Amino acid transport and metabolism	242	3e-64
ColeSingleton5512	At1g24190	[B]	KOG4204	Chromatin structure and dynamics	283	9e-77
ColeSingleton5534	At2g06990	[A]	KOG0948	RNA processing and modification	225	9e-68
ColeSingleton5536	At4g02450	[O]	KOG3158	Posttranslational modification, protein turnover, chaperones	81.6	4e-16
ColeSingleton5538	At5g22850	[O]	KOG1339	Posttranslational modification, protein turnover, chaperones	168	4e-42
ColeSingleton5550	At1g51580	[A]	KOG2190	RNA processing and modification	49.3	2e-06
ColeSingleton5550	At1g51580	[R]	KOG2190	General function prediction only	49.3	2e-06
ColeSingleton5553	At5g15090	[P]	KOG3126	Inorganic ion transport and metabolism	44.3	1e-08
ColeSingleton5554	At5g16210	[T]	KOG0211	Signal transduction mechanisms	52.8	2e-07
ColeSingleton5556	At2g43820	[G]	KOG1192	Carbohydrate transport and metabolism	67.4	1e-14
ColeSingleton5556	At2g43820	[C]	KOG1192	Energy production and conversion	67.4	1e-14
ColeSingleton5558	At5g48220	[E]	KOG4201	Amino acid transport and metabolism	99.8	2e-21
ColeSingleton5568	At4g38620	[K]	KOG0048	Transcription	51.2	7e-07
ColeSingleton5570	At3g62700	[Q]	KOG0054	Secondary metabolites biosynthesis, transport and catabolism	224	3e-59
ColeSingleton5571	At5g01980	[O]	KOG0800	Posttranslational modification, protein turnover, chaperones	54.3	6e-08
ColeSingleton5574	At3g07790	[R]	KOG2627	General function prediction only	147	3e-44
ColeSingleton5587	At1g60890	[T]	KOG0229	Signal transduction mechanisms	64.3	6e-11
ColeSingleton5598	At1g19600	[G]	KOG2854	Carbohydrate transport and metabolism	136	5e-36
ColeSingleton5600	At1g68560	[G]	KOG1065	Carbohydrate transport and metabolism	77	8e-15
ColeSingleton5604	At3g15290	[I]	KOG2304	Lipid transport and metabolism	163	1e-40
ColeSingleton5607	SPAC821.10c	[P]	KOG0441	Inorganic ion transport and metabolism	66.2	3e-16
ColeSingleton5608	At1g47380	[T]	KOG0698	Signal transduction mechanisms	135	3e-32
ColeSingleton5609	7290870	[K]	KOG1474	Transcription	53.5	1e-07
ColeSingleton5614	At2g18190	[O]	KOG0743	Posttranslational modification, protein turnover, chaperones	71.6	4e-13
ColeSingleton5616	At1g12930	[Y]	KOG2022	Nuclear structure	59.7	1e-09
ColeSingleton5616	At1g12930	[U]	KOG2022	Intracellular trafficking, secretion, and vesicular transport	59.7	1e-09
ColeSingleton5624	At3g47800	[G]	KOG1604	Carbohydrate transport and metabolism	195	5e-50
ColeSingleton5627	At1g11910	[O]	KOG1339	Posttranslational modification, protein turnover, chaperones	134	1e-32
ColeSingleton5628	At5g21040	[R]	KOG0274	General function prediction only	138	1e-36
ColeSingleton5630	At4g38350	[I]	KOG1933	Lipid transport and metabolism	145	4e-35
ColeSingleton5634	At4g10580	[R]	KOG0017	General function prediction only	52.4	2e-07
ColeSingleton5638	At2g46560	[R]	KOG1064	General function prediction only	80.5	8e-16
ColeSingleton5641	At3g15620	[L]	KOG0133	Replication, recombination and repair	56.6	2e-08
ColeSingleton5641	At3g15620	[T]	KOG0133	Signal transduction mechanisms	56.6	2e-08
ColeSingleton5644	At2g34930	[R]	KOG0619	General function prediction only	87.8	7e-18
ColeSingleton5651	At3g25100	[L]	KOG2475	Replication, recombination and repair	142	2e-34
ColeSingleton5664	At1g77990	[P]	KOG0236	Inorganic ion transport and metabolism	56.2	2e-08
ColeSingleton5695	At3g03960	[O]	KOG0362	Posttranslational modification, protein turnover, chaperones	52.8	2e-07
ColeSingleton5699	At5g65490	[K]	KOG2406	Transcription	59.7	1e-09
ColeSingleton5707	At5g46630	[U]	KOG0938	Intracellular trafficking, secretion, and vesicular transport	48.5	3e-06
ColeSingleton5715	At1g34545	[R]	KOG0017	General function prediction only	50.1	1e-06
ColeSingleton5725	At1g35647	[R]	KOG0017	General function prediction only	81.3	2e-19
ColeSingleton5727	At1g15100	[O]	KOG0800	Posttranslational modification, protein turnover, chaperones	103	1e-22
ColeSingleton5729	At4g38460	[H]	KOG0776	Coenzyme transport and metabolism	61.2	8e-10
ColeSingleton5737	At3g47900	[O]	KOG1887	Posttranslational modification, protein turnover, chaperones	88.2	4e-18
ColeSingleton5738	At1g72440	[J]	KOG2038	Translation, ribosomal structure and biogenesis	55.5	3e-08
ColeSingleton5738	At1g72440	[K]	KOG2038	Transcription	55.5	3e-08
ColeSingleton5741	At1g80690	[S]	KOG0324	Function unknown	165	2e-41
ColeSingleton5744	At2g36010	[K]	KOG2577	Transcription	60.5	1e-09
ColeSingleton5754	At4g29010	[I]	KOG1683	Lipid transport and metabolism	127	4e-30
ColeSingleton5755	At1g43710	[E]	KOG0629	Amino acid transport and metabolism	122	4e-39
ColeSingleton5757	At4g19410	[M]	KOG4287	Cell wall/membrane/envelope biogenesis	80.9	6e-16
ColeSingleton5765	At1g21980	[T]	KOG0229	Signal transduction mechanisms	110	1e-24
ColeSingleton5775	At3g52720	[R]	KOG0382	General function prediction only	97.8	6e-21
ColeSingleton5784	At3g17240	[C]	KOG1335	Energy production and conversion	184	4e-59
ColeSingleton5787	At1g73760	[O]	KOG0800	Posttranslational modification, protein turnover, chaperones	122	2e-28
ColeSingleton5789	At1g76520	[S]	KOG2722	Function unknown	53.5	1e-07
ColeSingleton5791	At3g03470	[Q]	KOG0156	Secondary metabolites biosynthesis, transport and catabolism	97.4	6e-21
ColeSingleton5795	SPBC577.02	[J]	KOG3499	Translation, ribosomal structure and biogenesis	102	3e-22
ColeSingleton5798	At2g47250	[A]	KOG0925	RNA processing and modification	275	2e-74
ColeSingleton5800	At5g59720	[O]	KOG0710	Posttranslational modification, protein turnover, chaperones	80.1	1e-15
ColeSingleton5804	Hs22043616	[P]	KOG0500	Inorganic ion transport and metabolism	47.8	7e-06
ColeSingleton5804	Hs22043616	[T]	KOG0500	Signal transduction mechanisms	47.8	7e-06
ColeSingleton5808	At3g24170	[Q]	KOG0405	Secondary metabolites biosynthesis, transport and catabolism	167	3e-42
ColeSingleton5814	At3g07160	[M]	KOG0916	Cell wall/membrane/envelope biogenesis	142	1e-40
ColeSingleton5820	At2g17200	[O]	KOG0010	Posttranslational modification, protein turnover, chaperones	108	6e-44
ColeSingleton5820	At2g17200	[R]	KOG0010	General function prediction only	108	6e-44
ColeSingleton5825	At2g39350	[Q]	KOG0061	Secondary metabolites biosynthesis, transport and catabolism	168	5e-42
ColeSingleton5829	At1g74800	[G]	KOG2287	Carbohydrate transport and metabolism	65.1	4e-15
ColeSingleton5830	At2g17610	[R]	KOG1075	General function prediction only	48.9	3e-06
ColeSingleton5833	At2g35680	[V]	KOG1719	Defense mechanisms	59.3	2e-09
ColeSingleton5835	At2g10780	[R]	KOG0017	General function prediction only	129	2e-30
ColeSingleton5839	YGR256w	[G]	KOG2653	Carbohydrate transport and metabolism	247	9e-66
ColeSingleton5841	At5g65930_1	[N]	KOG4229	Cell motility	275	3e-74
ColeSingleton5842	At4g11220	[U]	KOG1792	Intracellular trafficking, secretion, and vesicular transport	101	3e-22
ColeSingleton5846	At4g38950	[Z]	KOG0242	Cytoskeleton	46.2	3e-10
ColeSingleton5847	At5g10070	[S]	KOG3154	Function unknown	90.9	6e-19
ColeSingleton5852	At5g67570	[R]	KOG4197	General function prediction only	58.2	4e-09
ColeSingleton5853	At5g51170	[S]	KOG3102	Function unknown	78.2	4e-15
ColeSingleton5855	At1g08410	[R]	KOG1424	General function prediction only	54.3	3e-11
ColeSingleton5869	At3g51120_3	[R]	KOG1862	General function prediction only	66.6	2e-11
ColeSingleton5874	At2g25290	[O]	KOG4151	Posttranslational modification, protein turnover, chaperones	188	4e-48
ColeSingleton5874	At2g25290	[D]	KOG4151	Cell cycle control, cell division, chromosome partitioning	188	4e-48
ColeSingleton5874	At2g25290	[R]	KOG4151	General function prediction only	188	4e-48
ColeSingleton5879	At3g02110	[O]	KOG1282	Posttranslational modification, protein turnover, chaperones	228	2e-60
ColeSingleton5879	At3g02110	[E]	KOG1282	Amino acid transport and metabolism	228	2e-60
ColeSingleton5882	At3g11964	[A]	KOG1070	RNA processing and modification	55.5	3e-08
ColeSingleton5883	At1g01390	[G]	KOG1192	Carbohydrate transport and metabolism	77	3e-19
ColeSingleton5883	At1g01390	[C]	KOG1192	Energy production and conversion	77	3e-19
ColeSingleton5886	Hs14149665	[K]	KOG1874	Transcription	63.5	1e-10
ColeSingleton5892	At2g31320	[K]	KOG1037	Transcription	88.2	9e-21
ColeSingleton5892	At2g31320	[L]	KOG1037	Replication, recombination and repair	88.2	9e-21
ColeSingleton5892	At2g31320	[O]	KOG1037	Posttranslational modification, protein turnover, chaperones	88.2	9e-21
ColeSingleton5896	At5g09810	[Z]	KOG0676	Cytoskeleton	241	3e-64
ColeSingleton5899	At1g26110	[U]	KOG1073	Intracellular trafficking, secretion, and vesicular transport	103	2e-25
ColeSingleton5906	At1g75450	[C]	KOG1231	Energy production and conversion	132	1e-46
ColeSingleton5907	At2g37770	[R]	KOG1577	General function prediction only	115	5e-26
ColeSingleton5913	At3g14790	[G]	KOG0747	Carbohydrate transport and metabolism	162	1e-40
ColeSingleton5915	At1g57860	[J]	KOG1732	Translation, ribosomal structure and biogenesis	92.4	2e-19
ColeSingleton5922	At3g06370	[P]	KOG1965	Inorganic ion transport and metabolism	68.6	3e-18
ColeSingleton5924	At3g15355	[O]	KOG0895	Posttranslational modification, protein turnover, chaperones	115	4e-48
ColeSingleton5926	At3g45770	[K]	KOG0025	Transcription	219	3e-60
ColeSingleton5926	At3g45770	[C]	KOG0025	Energy production and conversion	219	3e-60
ColeSingleton5932	At1g10290	[U]	KOG0446	Intracellular trafficking, secretion, and vesicular transport	79.7	1e-15
ColeSingleton5932	At1g10290	[R]	KOG0446	General function prediction only	79.7	1e-15
ColeSingleton5933	At2g33600	[V]	KOG1502	Defense mechanisms	112	1e-52
ColeSingleton5937	At5g15550	[Z]	KOG0313	Cytoskeleton	105	6e-27
ColeSingleton5950	At4g24190	[O]	KOG0020	Posttranslational modification, protein turnover, chaperones	78.2	4e-15
ColeSingleton5956	At4g14000	[R]	KOG2920	General function prediction only	174	7e-44
ColeSingleton5960	At2g24170	[U]	KOG1278	Intracellular trafficking, secretion, and vesicular transport	132	3e-31
ColeSingleton5962	At5g67340	[S]	KOG0167	Function unknown	64.7	4e-11
ColeSingleton5963	At4g22580	[G]	KOG1021	Carbohydrate transport and metabolism	75.5	2e-14
ColeSingleton5963	At4g22580	[M]	KOG1021	Cell wall/membrane/envelope biogenesis	75.5	2e-14
ColeSingleton5963	At4g22580	[W]	KOG1021	Extracellular structures	75.5	2e-14
ColeSingleton5972	At5g53180	[A]	KOG1190	RNA processing and modification	83.6	1e-16
ColeSingleton5983	At3g26990	[A]	KOG2669	RNA processing and modification	66.2	2e-11
ColeSingleton5986	At1g17580	[Z]	KOG0160	Cytoskeleton	174	6e-58
ColeSingleton5994	At5g53460	[E]	KOG0399	Amino acid transport and metabolism	258	4e-70
ColeSingleton6002	At2g29080	[O]	KOG0731	Posttranslational modification, protein turnover, chaperones	214	8e-56
ColeSingleton6003	At4g03460	[R]	KOG0504	General function prediction only	48.9	2e-06
ColeSingleton6005	At3g58730	[C]	KOG1647	Energy production and conversion	89	2e-18
ColeSingleton6007	At3g20810	[B]	KOG2132	Chromatin structure and dynamics	98.6	3e-21
ColeSingleton6007	At3g20810	[T]	KOG2132	Signal transduction mechanisms	98.6	3e-21
ColeSingleton6012	At3g01900	[Q]	KOG0157	Secondary metabolites biosynthesis, transport and catabolism	139	2e-33
ColeSingleton6012	At3g01900	[I]	KOG0157	Lipid transport and metabolism	139	2e-33
ColeSingleton6017	At5g15680	[R]	KOG1825	General function prediction only	78.2	1e-20
ColeSingleton6019	At1g71270	[U]	KOG1961	Intracellular trafficking, secretion, and vesicular transport	176	1e-44
ColeSingleton6019	At1g71270	[Z]	KOG1961	Cytoskeleton	176	1e-44
ColeSingleton6021	At5g58870	[O]	KOG0731	Posttranslational modification, protein turnover, chaperones	106	1e-23
ColeSingleton6022	At1g47910	[R]	KOG1075	General function prediction only	34.7	2e-06
ColeSingleton6024	At2g47830	[P]	KOG1485	Inorganic ion transport and metabolism	90.9	6e-19
ColeSingleton6025	At1g59610	[U]	KOG0446	Intracellular trafficking, secretion, and vesicular transport	87.4	9e-30
ColeSingleton6025	At1g59610	[R]	KOG0446	General function prediction only	87.4	9e-30
ColeSingleton6034	At2g01840	[R]	KOG1075	General function prediction only	56.6	3e-08
ColeSingleton6035	At2g20460	[R]	KOG0017	General function prediction only	51.2	2e-09
ColeSingleton6038	7299415	[J]	KOG1767	Translation, ribosomal structure and biogenesis	83.2	2e-22
ColeSingleton6041	At2g15650	[R]	KOG0017	General function prediction only	54.3	4e-12
ColeSingleton6043	At2g03880	[R]	KOG4197	General function prediction only	48.9	2e-06
ColeSingleton6046	At1g51680	[I]	KOG1176	Lipid transport and metabolism	99	2e-21
ColeSingleton6048	At1g22930	[T]	KOG1981	Signal transduction mechanisms	110	5e-25
ColeSingleton6057	Hs14150155	[S]	KOG4068	Function unknown	74.3	6e-14
ColeSingleton6060	At3g51470	[T]	KOG0698	Signal transduction mechanisms	60.1	1e-09
ColeSingleton6063	At5g54200	[S]	KOG0283	Function unknown	151	3e-37
ColeSingleton6064	At4g33000	[T]	KOG0034	Signal transduction mechanisms	134	5e-32
ColeSingleton6070	At2g41760	[S]	KOG3261	Function unknown	168	5e-42
ColeSingleton6073	At1g63770	[E]	KOG1046	Amino acid transport and metabolism	112	2e-25
ColeSingleton6073	At1g63770	[O]	KOG1046	Posttranslational modification, protein turnover, chaperones	112	2e-25
ColeSingleton6074	At4g07810	[R]	KOG0017	General function prediction only	33.5	8e-06
ColeSingleton6079	At3g50740	[G]	KOG1192	Carbohydrate transport and metabolism	125	2e-29
ColeSingleton6079	At3g50740	[C]	KOG1192	Energy production and conversion	125	2e-29
ColeSingleton6091	At1g61850	[I]	KOG4231	Lipid transport and metabolism	115	6e-26
ColeSingleton6099	YHR077c	[A]	KOG2051	RNA processing and modification	55.5	3e-08
ColeSingleton6109	At3g28030	[L]	KOG2520	Replication, recombination and repair	65.5	3e-11
ColeSingleton6111	At4g31940	[Q]	KOG0156	Secondary metabolites biosynthesis, transport and catabolism	112	9e-26
ColeSingleton6114	At1g69850	[E]	KOG1237	Amino acid transport and metabolism	115	2e-26
ColeSingleton6116	At5g38460	[G]	KOG2575	Carbohydrate transport and metabolism	110	3e-47
ColeSingleton6116	At5g38460	[E]	KOG2575	Amino acid transport and metabolism	110	3e-47
ColeSingleton6118	At4g26270	[G]	KOG2440	Carbohydrate transport and metabolism	198	2e-51
ColeSingleton6119	At5g14700	[V]	KOG1502	Defense mechanisms	96.7	1e-20
ColeSingleton6120	At1g18270_1	[R]	KOG0409	General function prediction only	218	8e-63
ColeSingleton6121	At5g25560	[R]	KOG1940	General function prediction only	70.9	6e-13
ColeSingleton6127	At5g03330	[T]	KOG2605	Signal transduction mechanisms	98.2	3e-30
ColeSingleton6127	At5g03330	[O]	KOG2605	Posttranslational modification, protein turnover, chaperones	98.2	3e-30
ColeSingleton6130	At3g03740	[D]	KOG1987	Cell cycle control, cell division, chromosome partitioning	221	5e-63
ColeSingleton6130	At3g03740	[R]	KOG1987	General function prediction only	221	5e-63
ColeSingleton6134	At5g20000	[O]	KOG0728	Posttranslational modification, protein turnover, chaperones	322	2e-88
ColeSingleton6137	At4g34131	[G]	KOG1192	Carbohydrate transport and metabolism	53.5	1e-07
ColeSingleton6137	At4g34131	[C]	KOG1192	Energy production and conversion	53.5	1e-07
ColeSingleton6138	At2g02800	[T]	KOG1187	Signal transduction mechanisms	187	8e-48
ColeSingleton6141	At2g29940	[Q]	KOG0065	Secondary metabolites biosynthesis, transport and catabolism	132	2e-31
ColeSingleton6143	At2g16670	[R]	KOG0017	General function prediction only	67.4	3e-21
ColeSingleton6145	At2g16430	[G]	KOG1378	Carbohydrate transport and metabolism	113	8e-26
ColeSingleton6147	At1g47520	[R]	KOG0017	General function prediction only	45.4	1e-06
ColeSingleton6150	At1g72550	[J]	KOG2472	Translation, ribosomal structure and biogenesis	56.2	2e-08
ColeSingleton6158	At5g22920	[R]	KOG1940	General function prediction only	75.5	3e-28
ColeSingleton6162	At4g31940	[Q]	KOG0156	Secondary metabolites biosynthesis, transport and catabolism	76.3	5e-22
ColeSingleton6164	At3g51850	[T]	KOG0032	Signal transduction mechanisms	56.2	2e-08
ColeSingleton6166	At4g22670_2	[O]	KOG1308	Posttranslational modification, protein turnover, chaperones	83.6	9e-17
ColeSingleton6166	At4g22670_2	[T]	KOG1308	Signal transduction mechanisms	83.6	9e-17
ColeSingleton6172	At2g23220	[Q]	KOG0156	Secondary metabolites biosynthesis, transport and catabolism	62.8	2e-10
ColeSingleton6174	At1g03410	[Q]	KOG0143	Secondary metabolites biosynthesis, transport and catabolism	81.3	4e-16
ColeSingleton6174	At1g03410	[R]	KOG0143	General function prediction only	81.3	4e-16
ColeSingleton6175	At5g60410	[K]	KOG2169	Transcription	125	2e-29
ColeSingleton6177	At1g67490	[G]	KOG2161	Carbohydrate transport and metabolism	171	8e-43
ColeSingleton6179	At4g31940	[Q]	KOG0156	Secondary metabolites biosynthesis, transport and catabolism	60.5	8e-10
ColeSingleton6182	At3g15470	[S]	KOG0283	Function unknown	88.6	3e-18
ColeSingleton6183	At1g76130	[G]	KOG0471	Carbohydrate transport and metabolism	136	1e-32
ColeSingleton6185	At5g47680	[S]	KOG2967	Function unknown	87	8e-18
ColeSingleton6186	At1g10950	[U]	KOG1277	Intracellular trafficking, secretion, and vesicular transport	125	3e-29
ColeSingleton6193	At1g47560_1	[U]	KOG2148	Intracellular trafficking, secretion, and vesicular transport	113	2e-25
ColeSingleton6201	At1g79000	[K]	KOG1778	Transcription	72	3e-13
ColeSingleton6209	At1g16220	[T]	KOG0698	Signal transduction mechanisms	91.3	4e-19
ColeSingleton6213	At1g72440	[J]	KOG2038	Translation, ribosomal structure and biogenesis	130	8e-31
ColeSingleton6213	At1g72440	[K]	KOG2038	Transcription	130	8e-31
ColeSingleton6217	At4g02280	[M]	KOG0853	Cell wall/membrane/envelope biogenesis	161	3e-40
ColeSingleton6221	At3g14790	[G]	KOG0747	Carbohydrate transport and metabolism	107	8e-24
ColeSingleton6225	At5g64200	[A]	KOG4207	RNA processing and modification	56.2	2e-08
ColeSingleton6228	At1g22370	[G]	KOG1192	Carbohydrate transport and metabolism	124	5e-29
ColeSingleton6228	At1g22370	[C]	KOG1192	Energy production and conversion	124	5e-29
ColeSingleton6229	At5g40810	[C]	KOG3052	Energy production and conversion	123	1e-28
ColeSingleton6239	At3g24350	[U]	KOG0812	Intracellular trafficking, secretion, and vesicular transport	70.9	8e-13
ColeSingleton6242	At2g02800	[T]	KOG1187	Signal transduction mechanisms	149	4e-36
ColeSingleton6245	At4g17450	[R]	KOG0017	General function prediction only	57.4	7e-09
ColeSingleton6249	At2g20110	[P]	KOG1171	Inorganic ion transport and metabolism	156	2e-43
ColeSingleton6252	At1g61820	[G]	KOG0626	Carbohydrate transport and metabolism	137	1e-32
ColeSingleton6257	At1g34130	[O]	KOG2292	Posttranslational modification, protein turnover, chaperones	59.7	2e-21
ColeSingleton6260	At4g17970	[R]	KOG4711	General function prediction only	86.3	3e-17
ColeSingleton6273	At1g76880	[K]	KOG4282	Transcription	138	2e-33
ColeSingleton6275	At1g80410	[B]	KOG1156	Chromatin structure and dynamics	131	5e-31
ColeSingleton6276	SPAC19G12.06c	[B]	KOG1756	Chromatin structure and dynamics	204	5e-53
ColeSingleton6284	At5g64440	[J]	KOG1211	Translation, ribosomal structure and biogenesis	56.6	8e-09
ColeSingleton6296	At2g40830	[O]	KOG0800	Posttranslational modification, protein turnover, chaperones	85.9	3e-17
ColeSingleton6302	At1g16050	[M]	KOG3144	Cell wall/membrane/envelope biogenesis	104	6e-27
ColeSingleton6302	At1g16050	[O]	KOG3144	Posttranslational modification, protein turnover, chaperones	104	6e-27
ColeSingleton6311	7297066	[S]	KOG4102	Function unknown	61.2	5e-10
ColeSingleton6315	At2g47210	[B]	KOG2656	Chromatin structure and dynamics	114	7e-26
ColeSingleton6315	At2g47210	[K]	KOG2656	Transcription	114	7e-26
ColeSingleton6318	At2g16000	[R]	KOG0017	General function prediction only	47.4	7e-06
ColeSingleton6319	At5g52380	[O]	KOG4400	Posttranslational modification, protein turnover, chaperones	59.3	2e-09
ColeSingleton6332	At4g02490	[R]	KOG1075	General function prediction only	55.5	3e-08
ColeSingleton6340	At1g04170	[J]	KOG0466	Translation, ribosomal structure and biogenesis	75.1	3e-14
ColeSingleton6344	At4g10320	[J]	KOG0434	Translation, ribosomal structure and biogenesis	247	6e-66
ColeSingleton6345	At3g46130	[K]	KOG0048	Transcription	58.2	5e-09
ColeSingleton6349	At2g31790	[G]	KOG1192	Carbohydrate transport and metabolism	51.2	5e-07
ColeSingleton6349	At2g31790	[C]	KOG1192	Energy production and conversion	51.2	5e-07
ColeSingleton6352	At3g53120	[S]	KOG3270	Function unknown	77.8	5e-15
ColeSingleton6355	At5g46420	[M]	KOG2388	Cell wall/membrane/envelope biogenesis	62.4	2e-10
ColeSingleton6357	At1g25220	[E]	KOG0026	Amino acid transport and metabolism	84	4e-31
ColeSingleton6359	At2g26140	[O]	KOG0734	Posttranslational modification, protein turnover, chaperones	65.1	5e-11
ColeSingleton6360	At4g39050	[Z]	KOG0242	Cytoskeleton	160	6e-40
ColeSingleton6361	At2g18280	[R]	KOG2502	General function prediction only	82.4	2e-16
ColeSingleton6366	At4g15760_1	[C]	KOG2614	Energy production and conversion	39.7	1e-08
ColeSingleton6366	At4g15760_1	[R]	KOG2614	General function prediction only	39.7	1e-08
ColeSingleton6388	At2g34960	[E]	KOG1286	Amino acid transport and metabolism	146	1e-35
ColeSingleton6392	At1g50260	[R]	KOG1012	General function prediction only	169	9e-47
ColeSingleton6394	SPCC13B11.01	[Q]	KOG0023	Secondary metabolites biosynthesis, transport and catabolism	176	2e-44
ColeSingleton6396	At4g39250	[O]	KOG0724	Posttranslational modification, protein turnover, chaperones	50.4	9e-07
ColeSingleton6397	At2g13360	[R]	KOG2862	General function prediction only	94	7e-20
ColeSingleton6400	At3g09650	[R]	KOG4197	General function prediction only	94.4	5e-20
ColeSingleton6412	At5g51340	[S]	KOG2300	Function unknown	137	1e-40
ColeSingleton6415	At4g22930	[F]	KOG2902	Nucleotide transport and metabolism	271	4e-73
ColeSingleton6421	At3g02860	[S]	KOG3032	Function unknown	106	1e-23
ColeSingleton6423	At3g53340	[K]	KOG0869	Transcription	103	4e-25
ColeSingleton6427	CE03436	[C]	KOG1526	Energy production and conversion	86.3	6e-25
ColeSingleton6436	At5g14170	[B]	KOG2570	Chromatin structure and dynamics	61.2	9e-10
ColeSingleton6436	At5g14170	[K]	KOG2570	Transcription	61.2	9e-10
ColeSingleton6438	At1g29800	[S]	KOG1843	Function unknown	48.1	4e-20
ColeSingleton6443	At4g19130	[L]	KOG0851	Replication, recombination and repair	170	2e-47
ColeSingleton6445	At3g56150	[J]	KOG1076	Translation, ribosomal structure and biogenesis	104	4e-23
ColeSingleton6449	At2g35520	[D]	KOG1746	Cell cycle control, cell division, chromosome partitioning	74.7	7e-14
ColeSingleton6449	At2g35520	[O]	KOG1746	Posttranslational modification, protein turnover, chaperones	74.7	7e-14
ColeSingleton6451	At4g14580	[T]	KOG0583	Signal transduction mechanisms	121	4e-28
ColeSingleton6452	At5g51340	[S]	KOG2300	Function unknown	58.5	3e-09
ColeSingleton6460	At1g73880	[G]	KOG1192	Carbohydrate transport and metabolism	58.9	2e-09
ColeSingleton6460	At1g73880	[C]	KOG1192	Energy production and conversion	58.9	2e-09
ColeSingleton6481	At1g21870	[G]	KOG1441	Carbohydrate transport and metabolism	124	4e-29
ColeSingleton6481	At1g21870	[E]	KOG1441	Amino acid transport and metabolism	124	4e-29
ColeSingleton6494	At1g60430	[Z]	KOG3155	Cytoskeleton	195	2e-50
ColeSingleton6499	At3g55960	[K]	KOG1605	Transcription	108	2e-24
ColeSingleton6500	At4g05050	[O]	KOG0001	Posttranslational modification, protein turnover, chaperones	72.4	2e-13
ColeSingleton6500	At4g05050	[R]	KOG0001	General function prediction only	72.4	2e-13
ColeSingleton6503	At5g46110	[G]	KOG1441	Carbohydrate transport and metabolism	100	9e-22
ColeSingleton6503	At5g46110	[E]	KOG1441	Amino acid transport and metabolism	100	9e-22
ColeSingleton6510	At1g74650	[K]	KOG0048	Transcription	53.9	8e-08
ColeSingleton6521	At1g31730	[U]	KOG1062	Intracellular trafficking, secretion, and vesicular transport	179	3e-45
ColeSingleton6536	7292130	[A]	KOG1869	RNA processing and modification	48.5	6e-06
ColeSingleton6537	At5g53050	[I]	KOG4178	Lipid transport and metabolism	86.7	1e-17
ColeSingleton6544	At3g24550	[T]	KOG1187	Signal transduction mechanisms	293	2e-79
ColeSingleton6550	At3g05990	[R]	KOG0619	General function prediction only	189	2e-48
ColeSingleton6551	At2g17500	[S]	KOG2722	Function unknown	55.5	4e-14
ColeSingleton6559	YNR016c	[I]	KOG0368	Lipid transport and metabolism	113	2e-25
ColeSingleton6561	At1g50510	[R]	KOG3009	General function prediction only	215	2e-56
ColeSingleton6564	At2g42500	[T]	KOG0371	Signal transduction mechanisms	39.7	1e-08
ColeSingleton6566	At5g44250	[S]	KOG2521	Function unknown	41.6	4e-08
ColeSingleton6570	At3g12800	[R]	KOG0725	General function prediction only	87	3e-21
ColeSingleton6574	At5g52920	[G]	KOG2323	Carbohydrate transport and metabolism	62.8	2e-10
ColeSingleton6576	At5g19690	[O]	KOG2292	Posttranslational modification, protein turnover, chaperones	121	4e-28
ColeSingleton6586	At4g16020	[R]	KOG0017	General function prediction only	176	1e-44
ColeSingleton6598	At5g01400	[A]	KOG1895	RNA processing and modification	63.2	1e-10
ColeSingleton6599	At1g09760	[A]	KOG1644	RNA processing and modification	248	4e-66
ColeSingleton6609	At2g07680	[Q]	KOG0054	Secondary metabolites biosynthesis, transport and catabolism	81.6	6e-16
ColeSingleton6620	At1g67490	[G]	KOG2161	Carbohydrate transport and metabolism	101	3e-22
ColeSingleton6622	At3g13610	[Q]	KOG0143	Secondary metabolites biosynthesis, transport and catabolism	55.5	3e-08
ColeSingleton6622	At3g13610	[R]	KOG0143	General function prediction only	55.5	3e-08
ColeSingleton6635	At1g78270	[G]	KOG1192	Carbohydrate transport and metabolism	158	5e-39
ColeSingleton6635	At1g78270	[C]	KOG1192	Energy production and conversion	158	5e-39
ColeSingleton6637	At4g00850	[K]	KOG3227	Transcription	89	4e-18
ColeSingleton6638	At4g38890	[R]	KOG2333	General function prediction only	87.8	9e-24
ColeSingleton6639	At4g13510	[P]	KOG0682	Inorganic ion transport and metabolism	64.3	6e-11
ColeSingleton6647	At2g47850	[R]	KOG1677	General function prediction only	107	8e-24
ColeSingleton6648	Hs7705397	[U]	KOG2115	Intracellular trafficking, secretion, and vesicular transport	46.6	1e-08
ColeSingleton6650	At3g24800_1	[O]	KOG4159	Posttranslational modification, protein turnover, chaperones	60.1	2e-09
ColeSingleton6654	At4g12780	[R]	KOG0431	General function prediction only	47	1e-07
ColeSingleton6655	At1g34370	[R]	KOG1721	General function prediction only	160	9e-40
ColeSingleton6658	At1g78900	[C]	KOG1352	Energy production and conversion	44.3	4e-10
ColeSingleton6661	At3g08720	[R]	KOG0598	General function prediction only	80.5	2e-15
ColeSingleton6661	At3g08720	[T]	KOG0598	Signal transduction mechanisms	80.5	2e-15
ColeSingleton6674	At3g13330	[S]	KOG1851	Function unknown	71.6	5e-13
ColeSingleton6679	At1g80090	[C]	KOG1764	Energy production and conversion	54.7	5e-08
ColeSingleton6689	At1g54560	[Z]	KOG0160	Cytoskeleton	56.6	1e-08
ColeSingleton6697	At3g47860	[M]	KOG4824	Cell wall/membrane/envelope biogenesis	67.4	9e-12
ColeSingleton6699	At2g35160_2	[B]	KOG1082	Chromatin structure and dynamics	172	1e-43
ColeSingleton6699	At2g35160_2	[K]	KOG1082	Transcription	172	1e-43
ColeSingleton6701	At5g05700	[O]	KOG1193	Posttranslational modification, protein turnover, chaperones	192	2e-49
ColeSingleton6712	At3g03800	[U]	KOG0810	Intracellular trafficking, secretion, and vesicular transport	54.3	6e-08
ColeSingleton6715	At3g44330	[E]	KOG2526	Amino acid transport and metabolism	138	3e-33
ColeSingleton6716	7296420	[B]	KOG2748	Chromatin structure and dynamics	33.1	2e-06
ColeSingleton6720	At4g26750	[S]	KOG0917	Function unknown	97.1	8e-21
ColeSingleton6729	At5g40270	[S]	KOG2681	Function unknown	84	7e-17
ColeSingleton6732	At5g35680	[J]	KOG3403	Translation, ribosomal structure and biogenesis	125	2e-29
ColeSingleton6749	At2g47420	[A]	KOG0820	RNA processing and modification	206	2e-53
ColeSingleton6751	At5g62180	[V]	KOG1515	Defense mechanisms	118	8e-34
ColeSingleton6754	At2g46800	[P]	KOG1482	Inorganic ion transport and metabolism	72.8	2e-25
ColeSingleton6756	At2g35160_2	[B]	KOG1082	Chromatin structure and dynamics	156	1e-38
ColeSingleton6756	At2g35160_2	[K]	KOG1082	Transcription	156	1e-38
ColeSingleton6758	At2g16000	[R]	KOG0017	General function prediction only	69.3	1e-22
ColeSingleton6765	At5g02270	[R]	KOG2355	General function prediction only	124	6e-29
ColeSingleton6765	At5g02270	[K]	KOG2355	Transcription	124	6e-29
ColeSingleton6766	At3g51800	[R]	KOG2776	General function prediction only	90.9	6e-19
ColeSingleton6798	At5g57610_2	[T]	KOG0192	Signal transduction mechanisms	62.8	2e-10
ColeSingleton6812	At2g35940	[K]	KOG0773	Transcription	56.6	1e-08
ColeSingleton6814	At4g17330_1	[S]	KOG1181	Function unknown	87.4	4e-19
ColeSingleton6816	Hs4505285	[W]	KOG1216	Extracellular structures	53.9	1e-07
ColeSingleton6816	Hs4505285	[V]	KOG1216	Defense mechanisms	53.9	1e-07
ColeSingleton6817	At2g13330	[R]	KOG0017	General function prediction only	129	3e-30
ColeSingleton6822	Hs20533270	[J]	KOG0052	Translation, ribosomal structure and biogenesis	72.8	4e-23
ColeSingleton6823	At5g12890	[G]	KOG1192	Carbohydrate transport and metabolism	77.4	7e-15
ColeSingleton6823	At5g12890	[C]	KOG1192	Energy production and conversion	77.4	7e-15
ColeSingleton6825	At1g09820	[R]	KOG4197	General function prediction only	73.6	9e-14
ColeSingleton6826	YKR080w	[H]	KOG0089	Coenzyme transport and metabolism	82	6e-16
ColeSingleton6829	At4g02450	[O]	KOG3158	Posttranslational modification, protein turnover, chaperones	87.4	1e-17
ColeSingleton6830	At2g13620	[P]	KOG1650	Inorganic ion transport and metabolism	167	6e-42
ColeSingleton6835	At5g02790	[O]	KOG0406	Posttranslational modification, protein turnover, chaperones	176	1e-44
ColeSingleton6844	SPAC1039.10	[J]	KOG2317	Translation, ribosomal structure and biogenesis	100	8e-22
ColeSingleton6847	Hs4885565	[I]	KOG3016	Lipid transport and metabolism	108	3e-24
ColeSingleton6850	At3g19690	[S]	KOG3017	Function unknown	96.3	2e-35
ColeSingleton6851	At3g58060	[P]	KOG1485	Inorganic ion transport and metabolism	127	7e-30
ColeSingleton6865	At5g43810	[J]	KOG1041	Translation, ribosomal structure and biogenesis	168	1e-43
ColeSingleton6866	At1g19520	[R]	KOG4197	General function prediction only	95.9	7e-28
ColeSingleton6870	At5g07010	[R]	KOG1584	General function prediction only	149	2e-36
ColeSingleton6874	At1g58060	[A]	KOG0920	RNA processing and modification	114	2e-30
ColeSingleton6877	At1g64780	[P]	KOG0682	Inorganic ion transport and metabolism	100	6e-22
ColeSingleton6885	At4g31210_2	[L]	KOG1956	Replication, recombination and repair	51.2	5e-07
ColeSingleton6890	At5g60020	[Q]	KOG1263	Secondary metabolites biosynthesis, transport and catabolism	214	7e-68
ColeSingleton6893	At3g22510	[S]	KOG4032	Function unknown	52	4e-07
ColeSingleton6897	At2g38760	[U]	KOG0819	Intracellular trafficking, secretion, and vesicular transport	171	5e-43
ColeSingleton6900	At1g79280	[S]	KOG4674	Function unknown	68.2	4e-12
ColeSingleton6902	At1g54250	[K]	KOG3400	Transcription	80.9	8e-17
ColeSingleton6918	At5g60590	[J]	KOG3051	Translation, ribosomal structure and biogenesis	129	2e-30
ColeSingleton6920	At5g13980	[G]	KOG1959	Carbohydrate transport and metabolism	185	2e-47
ColeSingleton6923	At3g24040	[G]	KOG0799	Carbohydrate transport and metabolism	63.9	7e-11
ColeSingleton6925	At5g43060_1	[O]	KOG1543	Posttranslational modification, protein turnover, chaperones	160	1e-57
ColeSingleton6928	At5g58980	[T]	KOG2232	Signal transduction mechanisms	180	1e-65
ColeSingleton6933	At2g45590	[T]	KOG1187	Signal transduction mechanisms	82	3e-16
ColeSingleton6934	At1g21480	[G]	KOG1021	Carbohydrate transport and metabolism	55.5	3e-08
ColeSingleton6934	At1g21480	[M]	KOG1021	Cell wall/membrane/envelope biogenesis	55.5	3e-08
ColeSingleton6934	At1g21480	[W]	KOG1021	Extracellular structures	55.5	3e-08
ColeSingleton6941	At3g22980	[J]	KOG0467	Translation, ribosomal structure and biogenesis	154	6e-38
ColeSingleton6943	At4g36650	[K]	KOG1597	Transcription	84.7	4e-17
ColeSingleton6956	At5g09310	[S]	KOG3402	Function unknown	152	2e-37
ColeSingleton6959	At4g14090	[G]	KOG1192	Carbohydrate transport and metabolism	69.3	2e-12
ColeSingleton6959	At4g14090	[C]	KOG1192	Energy production and conversion	69.3	2e-12
ColeSingleton6962	At3g17240	[C]	KOG1335	Energy production and conversion	127	5e-30
ColeSingleton6987	At2g05170	[U]	KOG2114	Intracellular trafficking, secretion, and vesicular transport	190	7e-49
ColeSingleton7000	At1g21900	[U]	KOG1691	Intracellular trafficking, secretion, and vesicular transport	95.9	2e-20
ColeSingleton7001	At5g15950	[T]	KOG0788	Signal transduction mechanisms	107	4e-24
ColeSingleton7002	At2g31320	[K]	KOG1037	Transcription	58.5	7e-09
ColeSingleton7002	At2g31320	[L]	KOG1037	Replication, recombination and repair	58.5	7e-09
ColeSingleton7002	At2g31320	[O]	KOG1037	Posttranslational modification, protein turnover, chaperones	58.5	7e-09
ColeSingleton7003	At1g20110	[R]	KOG1729	General function prediction only	49.7	1e-06
ColeSingleton7005	At3g51270	[T]	KOG2268	Signal transduction mechanisms	199	2e-51
ColeSingleton7005	At3g51270	[R]	KOG2268	General function prediction only	199	2e-51
ColeSingleton7006	At1g80280	[R]	KOG1454	General function prediction only	56.2	2e-08
ColeSingleton7008	At5g10380	[O]	KOG0800	Posttranslational modification, protein turnover, chaperones	53.5	1e-07
ColeSingleton7009	At3g11130	[U]	KOG0985	Intracellular trafficking, secretion, and vesicular transport	248	4e-66
ColeSingleton7012	At5g47820	[Z]	KOG0244	Cytoskeleton	178	6e-55
ColeSingleton7013	At5g27600	[I]	KOG1256	Lipid transport and metabolism	111	5e-25
ColeSingleton7016	At5g17010	[R]	KOG0254	General function prediction only	159	4e-50
ColeSingleton7018	At3g60170	[R]	KOG0017	General function prediction only	50.4	5e-13
ColeSingleton7031	At1g62310	[K]	KOG1356	Transcription	58.5	3e-09
ColeSingleton7032	At4g07810	[R]	KOG0017	General function prediction only	65.5	3e-11
ColeSingleton7034	At2g04490	[R]	KOG0017	General function prediction only	61.2	1e-09
ColeSingleton7038	YDL184c	[J]	KOG4752	Translation, ribosomal structure and biogenesis	49.7	2e-06
ColeSingleton7043	At1g74380	[G]	KOG4748	Carbohydrate transport and metabolism	59.3	5e-20
ColeSingleton7043	At1g74380	[M]	KOG4748	Cell wall/membrane/envelope biogenesis	59.3	5e-20
ColeSingleton7045	At4g04280	[R]	KOG0017	General function prediction only	37.7	2e-06
ColeSingleton7057	At4g28600	[T]	KOG4162	Signal transduction mechanisms	86.3	1e-17
ColeSingleton7059	At5g54830_2	[T]	KOG4293	Signal transduction mechanisms	85.1	3e-17
ColeSingleton7071	At2g31820	[R]	KOG0504	General function prediction only	68.6	3e-12
ColeSingleton7076	At4g38090	[S]	KOG3299	Function unknown	114	6e-26
ColeSingleton7082	At3g18660	[G]	KOG1950	Carbohydrate transport and metabolism	180	4e-76
ColeSingleton7084	At3g06330	[A]	KOG1609	RNA processing and modification	102	3e-22
ColeSingleton7085	At2g29410	[P]	KOG1482	Inorganic ion transport and metabolism	83.6	6e-29
ColeSingleton7094	At2g26350	[O]	KOG0317	Posttranslational modification, protein turnover, chaperones	183	2e-46
ColeSingleton7095	At5g65010	[E]	KOG0571	Amino acid transport and metabolism	205	3e-53
ColeSingleton7097	At2g15650	[R]	KOG0017	General function prediction only	58.2	4e-09
ColeSingleton7100	At5g65160	[R]	KOG1124	General function prediction only	83.6	2e-16
ColeSingleton7103	At2g21790	[F]	KOG1112	Nucleotide transport and metabolism	53.5	1e-07
ColeSingleton7108	At1g13750	[G]	KOG1378	Carbohydrate transport and metabolism	49.3	1e-10
ColeSingleton7125	At3g18390	[L]	KOG1990	Replication, recombination and repair	65.1	3e-17
ColeSingleton7133	At3g47390_1	[F]	KOG1018	Nucleotide transport and metabolism	125	1e-40
ColeSingleton7139	At5g41730	[T]	KOG0192	Signal transduction mechanisms	95.1	1e-24
ColeSingleton7140	At3g54980	[R]	KOG4197	General function prediction only	110	2e-30
ColeSingleton7141	At4g19780	[R]	KOG0017	General function prediction only	58.5	3e-09
ColeSingleton7156	At4g04180	[O]	KOG0730	Posttranslational modification, protein turnover, chaperones	201	4e-52
ColeSingleton7159	At3g44200	[R]	KOG0589	General function prediction only	89.7	1e-18
ColeSingleton7171	At1g77460	[S]	KOG0167	Function unknown	99	1e-25
ColeSingleton7173	At4g18800	[U]	KOG0087	Intracellular trafficking, secretion, and vesicular transport	126	1e-29
ColeSingleton7176	At5g40530	[A]	KOG3045	RNA processing and modification	53.5	1e-07
ColeSingleton7177	At1g25240	[T]	KOG0251	Signal transduction mechanisms	58.5	3e-09
ColeSingleton7177	At1g25240	[U]	KOG0251	Intracellular trafficking, secretion, and vesicular transport	58.5	3e-09
ColeSingleton7186	At3g07690	[C]	KOG2711	Energy production and conversion	118	2e-36
ColeSingleton7188	At3g01800	[J]	KOG4759	Translation, ribosomal structure and biogenesis	99	2e-21
ColeSingleton7201	At1g79830	[K]	KOG4673	Transcription	87.4	9e-18
ColeSingleton7210	7298895	[S]	KOG3282	Function unknown	49.3	4e-06
ColeSingleton7221	At5g49430	[R]	KOG0644	General function prediction only	115	2e-26
ColeSingleton7225	At4g29900	[P]	KOG0204	Inorganic ion transport and metabolism	100	6e-22
ColeSingleton7226	At5g25820	[G]	KOG1021	Carbohydrate transport and metabolism	51.6	2e-14
ColeSingleton7226	At5g25820	[M]	KOG1021	Cell wall/membrane/envelope biogenesis	51.6	2e-14
ColeSingleton7226	At5g25820	[W]	KOG1021	Extracellular structures	51.6	2e-14
ColeSingleton7227	At2g15410	[R]	KOG0017	General function prediction only	169	8e-48
ColeSingleton7229	At1g01830	[S]	KOG0167	Function unknown	175	2e-44
ColeSingleton7231	At3g19090	[R]	KOG1855	General function prediction only	115	3e-26
ColeSingleton7241	At1g09160	[T]	KOG0698	Signal transduction mechanisms	216	9e-57
ColeSingleton7242	At3g46970	[G]	KOG2099	Carbohydrate transport and metabolism	263	9e-71
ColeSingleton7247	At1g70320	[O]	KOG0939	Posttranslational modification, protein turnover, chaperones	56.2	2e-08
ColeSingleton7247	At1g70320	[K]	KOG0939	Transcription	56.2	2e-08
ColeSingleton7248	At3g10970	[R]	KOG2914	General function prediction only	189	9e-49
ColeSingleton7249	At1g05570	[M]	KOG0916	Cell wall/membrane/envelope biogenesis	187	2e-51
ColeSingleton7256	At2g28070	[Q]	KOG0061	Secondary metabolites biosynthesis, transport and catabolism	171	5e-43
ColeSingleton7258	At3g59530	[R]	KOG1520	General function prediction only	176	9e-45
ColeSingleton7260	At3g07360	[S]	KOG0167	Function unknown	200	8e-52
ColeSingleton7261	At3g25570	[T]	KOG0788	Signal transduction mechanisms	51.2	5e-07
ColeSingleton7264	At3g49910	[J]	KOG3401	Translation, ribosomal structure and biogenesis	169	2e-42
ColeSingleton7265	At3g49730_1	[R]	KOG4197	General function prediction only	103	1e-22
ColeSingleton7266	At5g05900	[G]	KOG1192	Carbohydrate transport and metabolism	98.6	3e-21
ColeSingleton7266	At5g05900	[C]	KOG1192	Energy production and conversion	98.6	3e-21
ColeSingleton7270	At5g47310	[S]	KOG0324	Function unknown	173	2e-47
ColeSingleton7274	At1g04200	[R]	KOG2225	General function prediction only	75.1	3e-14
ColeSingleton7282	At3g21250	[Q]	KOG0054	Secondary metabolites biosynthesis, transport and catabolism	60.5	8e-10
ColeSingleton7285	Hs14149665	[K]	KOG1874	Transcription	48.5	3e-06
ColeSingleton7287	At4g32830	[D]	KOG0580	Cell cycle control, cell division, chromosome partitioning	72.4	2e-13
ColeSingleton7289	At3g17205	[O]	KOG0942	Posttranslational modification, protein turnover, chaperones	89	2e-18
ColeSingleton7290	At5g62640	[S]	KOG4672	Function unknown	68.6	3e-12
ColeSingleton7297	At3g52660	[A]	KOG0117	RNA processing and modification	56.6	1e-08
ColeSingleton7298	At1g78680	[H]	KOG1559	Coenzyme transport and metabolism	169	2e-42
ColeSingleton7302	At1g24280	[G]	KOG0563	Carbohydrate transport and metabolism	79.3	3e-15
ColeSingleton7304	At5g11670	[C]	KOG1257	Energy production and conversion	81.6	3e-16
ColeSingleton7307	At3g12180	[O]	KOG2729	Posttranslational modification, protein turnover, chaperones	138	6e-33
ColeSingleton7307	At3g12180	[U]	KOG2729	Intracellular trafficking, secretion, and vesicular transport	138	6e-33
ColeSingleton7307	At3g12180	[T]	KOG2729	Signal transduction mechanisms	138	6e-33
ColeSingleton7308	At1g80420	[L]	KOG3226	Replication, recombination and repair	59.7	2e-09
ColeSingleton7309	At2g14930	[R]	KOG0017	General function prediction only	74.7	4e-14
ColeSingleton7311	Hs7662046	[K]	KOG1084	Transcription	47.8	6e-06
ColeSingleton7313	At4g30990	[V]	KOG1823	Defense mechanisms	121	3e-28
ColeSingleton7315	At2g33040	[C]	KOG1531	Energy production and conversion	69.7	3e-12
ColeSingleton7318	At5g48330	[S]	KOG1426	Function unknown	127	6e-30
ColeSingleton7320	At5g03730	[T]	KOG0192	Signal transduction mechanisms	68.6	6e-12
ColeSingleton7321	At2g30490	[Q]	KOG0156	Secondary metabolites biosynthesis, transport and catabolism	94.4	5e-20
ColeSingleton7326	At2g38510	[R]	KOG1347	General function prediction only	71.2	9e-26
ColeSingleton7341	At1g36620	[R]	KOG0017	General function prediction only	68.2	1e-23
ColeSingleton7345	At4g00910	[R]	KOG4711	General function prediction only	75.1	1e-17
ColeSingleton7349	At3g18140	[R]	KOG0315	General function prediction only	74.3	5e-14
ColeSingleton7353	At1g55750	[K]	KOG2074	Transcription	81.3	7e-16
ColeSingleton7353	At1g55750	[L]	KOG2074	Replication, recombination and repair	81.3	7e-16
ColeSingleton7363	At1g24360	[I]	KOG1200	Lipid transport and metabolism	67	9e-12
ColeSingleton7366	At1g03070	[T]	KOG2322	Signal transduction mechanisms	162	1e-40
ColeSingleton7373	At3g60820	[O]	KOG0179	Posttranslational modification, protein turnover, chaperones	83.6	1e-16
ColeSingleton7376	At4g38130	[B]	KOG1342	Chromatin structure and dynamics	138	3e-33
ColeSingleton7378	At2g27720	[J]	KOG3449	Translation, ribosomal structure and biogenesis	72.4	2e-13
ColeSingleton7380	At5g57250	[R]	KOG4197	General function prediction only	88.2	4e-18
ColeSingleton7383	At5g65260	[A]	KOG4209	RNA processing and modification	75.5	2e-14
ColeSingleton7386	At3g43220	[I]	KOG1888	Lipid transport and metabolism	218	6e-57
ColeSingleton7387	At3g55020	[U]	KOG2058	Intracellular trafficking, secretion, and vesicular transport	65.5	5e-11
ColeSingleton7389	At4g10580	[R]	KOG0017	General function prediction only	160	1e-39
ColeSingleton7392	At4g16420	[B]	KOG0457	Chromatin structure and dynamics	80.1	1e-15
ColeSingleton7397	At3g53500	[A]	KOG0107	RNA processing and modification	70.1	1e-12
ColeSingleton7398	At2g33410	[A]	KOG4205	RNA processing and modification	57.8	9e-09
ColeSingleton7401	At4g08500	[T]	KOG0198	Signal transduction mechanisms	97.8	3e-24
ColeSingleton7405	At3g11220	[B]	KOG3949	Chromatin structure and dynamics	55.5	4e-08
ColeSingleton7405	At3g11220	[K]	KOG3949	Transcription	55.5	4e-08
ColeSingleton7409	At5g20520	[R]	KOG4391	General function prediction only	68.9	2e-12
ColeSingleton7411	At1g10070	[E]	KOG0975	Amino acid transport and metabolism	120	4e-48
ColeSingleton7413	At2g27100	[R]	KOG2295	General function prediction only	152	1e-43
ColeSingleton7414	At4g16150	[S]	KOG0520	Function unknown	150	1e-36
ColeSingleton7421	At1g32850	[O]	KOG1870	Posttranslational modification, protein turnover, chaperones	95.9	9e-23
ColeSingleton7437	At4g27480	[G]	KOG0799	Carbohydrate transport and metabolism	47	9e-06
ColeSingleton7440	At2g27720	[J]	KOG3449	Translation, ribosomal structure and biogenesis	80.1	1e-15
ColeSingleton7456	SPAC4A8.04	[O]	KOG1153	Posttranslational modification, protein turnover, chaperones	146	2e-35
ColeSingleton7461	At3g61110	[J]	KOG1779	Translation, ribosomal structure and biogenesis	72.8	2e-13
ColeSingleton7462	At5g41980	[L]	KOG4585	Replication, recombination and repair	62.8	2e-10
ColeSingleton7475	At1g66070	[J]	KOG4813	Translation, ribosomal structure and biogenesis	48.1	6e-06
ColeSingleton7480	At3g19080	[K]	KOG1946	Transcription	126	2e-29
ColeSingleton7485	At4g24570	[C]	KOG0759	Energy production and conversion	73.2	1e-13
ColeSingleton7489	At5g27720	[A]	KOG3293	RNA processing and modification	186	1e-47
ColeSingleton7492	At5g09550	[O]	KOG1439	Posttranslational modification, protein turnover, chaperones	71.6	4e-13
ColeSingleton7493	At3g51895	[P]	KOG0236	Inorganic ion transport and metabolism	102	4e-22
ColeSingleton7495	At1g11180	[U]	KOG3088	Intracellular trafficking, secretion, and vesicular transport	117	7e-27
ColeSingleton7497	At4g17390	[J]	KOG1678	Translation, ribosomal structure and biogenesis	114	1e-26
ColeSingleton7504	At3g26618	[J]	KOG0688	Translation, ribosomal structure and biogenesis	185	2e-47
ColeSingleton7506	SPCP1E11.09c	[J]	KOG1762	Translation, ribosomal structure and biogenesis	133	1e-31
ColeSingleton7507	At3g61880	[Q]	KOG0156	Secondary metabolites biosynthesis, transport and catabolism	124	5e-29
ColeSingleton7511	At3g51850	[T]	KOG0032	Signal transduction mechanisms	214	9e-63
ColeSingleton7512	At4g21430	[K]	KOG1356	Transcription	76.6	1e-14
ColeSingleton7518	At5g49570	[O]	KOG0909	Posttranslational modification, protein turnover, chaperones	64.3	9e-16
ColeSingleton7521	At4g32470	[C]	KOG3440	Energy production and conversion	97.8	5e-21
ColeSingleton7535	At1g73180	[J]	KOG2315	Translation, ribosomal structure and biogenesis	116	1e-26
ColeSingleton7536	At3g26760	[R]	KOG0725	General function prediction only	48.9	4e-06
ColeSingleton7537	At5g17020	[Y]	KOG2020	Nuclear structure	182	4e-48
ColeSingleton7537	At5g17020	[U]	KOG2020	Intracellular trafficking, secretion, and vesicular transport	182	4e-48
ColeSingleton7542	Hs6005956	[V]	KOG1716	Defense mechanisms	94	1e-19
ColeSingleton7547	At1g44910	[A]	KOG0152	RNA processing and modification	75.9	2e-14
ColeSingleton7573	At2g46560	[R]	KOG1064	General function prediction only	72	7e-15
ColeSingleton7574	At4g03510	[O]	KOG0823	Posttranslational modification, protein turnover, chaperones	48.1	4e-06
ColeSingleton7576	At3g16060	[Z]	KOG0246	Cytoskeleton	76.6	1e-14
ColeSingleton7584	At3g02830	[R]	KOG1677	General function prediction only	95.5	3e-26
ColeSingleton7585	At5g19980	[G]	KOG1444	Carbohydrate transport and metabolism	45.1	1e-09
ColeSingleton7585	At5g19980	[O]	KOG1444	Posttranslational modification, protein turnover, chaperones	45.1	1e-09
ColeSingleton7585	At5g19980	[U]	KOG1444	Intracellular trafficking, secretion, and vesicular transport	45.1	1e-09
ColeSingleton7594	Hs4507349	[K]	KOG2341	Transcription	51.6	6e-07
ColeSingleton7599	At1g62290	[O]	KOG1339	Posttranslational modification, protein turnover, chaperones	49.3	4e-14
ColeSingleton7602	At2g41030	[K]	KOG3427	Transcription	110	1e-24
ColeSingleton7605	At1g17640	[R]	KOG0118	General function prediction only	139	2e-33
ColeSingleton7622	At3g05090	[S]	KOG0308	Function unknown	232	2e-61
ColeSingleton7624	At1g63380	[R]	KOG0725	General function prediction only	71.2	5e-13
ColeSingleton7625	At5g35410	[T]	KOG0583	Signal transduction mechanisms	90.5	7e-19
ColeSingleton7628	At1g08600	[K]	KOG1015	Transcription	42	1e-07
ColeSingleton7631	At5g02810	[K]	KOG1601	Transcription	119	1e-27
ColeSingleton7640	At3g42170	[L]	KOG1121	Replication, recombination and repair	109	2e-24
ColeSingleton7641	At3g06580	[G]	KOG0631	Carbohydrate transport and metabolism	58.9	3e-09
ColeSingleton7644	At1g71010	[T]	KOG0230	Signal transduction mechanisms	35.4	2e-06
ColeSingleton7647	At4g16780	[K]	KOG0483	Transcription	63.5	1e-10
ColeSingleton7653	At1g02090	[O]	KOG3250	Posttranslational modification, protein turnover, chaperones	57.4	7e-09
ColeSingleton7653	At1g02090	[T]	KOG3250	Signal transduction mechanisms	57.4	7e-09
ColeSingleton7656	At1g64790	[J]	KOG1242	Translation, ribosomal structure and biogenesis	150	5e-37
ColeSingleton7661	At4g19180_2	[F]	KOG1386	Nucleotide transport and metabolism	72.4	2e-13
ColeSingleton7667	At5g38990	[T]	KOG1187	Signal transduction mechanisms	71.6	4e-13
ColeSingleton7670	At5g60020	[Q]	KOG1263	Secondary metabolites biosynthesis, transport and catabolism	71.6	4e-13
ColeSingleton7672	At1g76490	[I]	KOG2480	Lipid transport and metabolism	149	3e-36
ColeSingleton7676	At4g31490	[U]	KOG1058	Intracellular trafficking, secretion, and vesicular transport	260	1e-69
ColeSingleton7698	At1g67110	[Q]	KOG0157	Secondary metabolites biosynthesis, transport and catabolism	96.3	1e-20
ColeSingleton7698	At1g67110	[I]	KOG0157	Lipid transport and metabolism	96.3	1e-20
ColeSingleton7700	At5g16260	[K]	KOG1548	Transcription	129	2e-30
ColeSingleton7705	At5g66690	[G]	KOG1192	Carbohydrate transport and metabolism	65.9	5e-21
ColeSingleton7705	At5g66690	[C]	KOG1192	Energy production and conversion	65.9	5e-21
ColeSingleton7706	At5g67100	[L]	KOG0970	Replication, recombination and repair	218	2e-59
ColeSingleton7708	At3g54700	[P]	KOG0252	Inorganic ion transport and metabolism	169	2e-47
ColeSingleton7709	At2g28450_2	[J]	KOG2187	Translation, ribosomal structure and biogenesis	94.7	4e-20
ColeSingleton7714	AtCh082	[J]	KOG3291	Translation, ribosomal structure and biogenesis	61.6	4e-10
ColeSingleton7722	SPAC19G12.10c	[O]	KOG1282	Posttranslational modification, protein turnover, chaperones	43.1	3e-10
ColeSingleton7722	SPAC19G12.10c	[E]	KOG1282	Amino acid transport and metabolism	43.1	3e-10
ColeSingleton7724	At3g05090	[S]	KOG0308	Function unknown	179	1e-45
ColeSingleton7725	At2g21280	[F]	KOG3019	Nucleotide transport and metabolism	87.4	6e-23
ColeSingleton7729	At5g01180	[E]	KOG1237	Amino acid transport and metabolism	75.1	3e-14
ColeSingleton7734	At5g51700	[R]	KOG1667	General function prediction only	47.8	6e-06
ColeSingleton7742	At4g30000	[H]	KOG2544	Coenzyme transport and metabolism	147	5e-36
ColeSingleton7754	At1g22620	[I]	KOG1888	Lipid transport and metabolism	144	7e-35
ColeSingleton7755	At5g19450	[T]	KOG0032	Signal transduction mechanisms	68.2	2e-12
ColeSingleton7763	At5g65360	[B]	KOG1745	Chromatin structure and dynamics	58.2	8e-15
ColeSingleton7768	At3g17090	[T]	KOG0700	Signal transduction mechanisms	71.6	5e-23
ColeSingleton7770	CE25102	[B]	KOG4364	Chromatin structure and dynamics	49.3	2e-06
ColeSingleton7781	At5g49980	[R]	KOG1947	General function prediction only	250	6e-67
ColeSingleton7787	At5g35750	[T]	KOG0519	Signal transduction mechanisms	90.5	8e-19
ColeSingleton7790	At2g38410	[U]	KOG1087	Intracellular trafficking, secretion, and vesicular transport	69.3	2e-12
ColeSingleton7798	At1g09020	[C]	KOG1764	Energy production and conversion	96.7	1e-20
[truncated: 26,007 more rows]

## Sheet: UniRef90
Unigene ID	Length	Hit protein	Score	E-value
[truncated: 44,057 more rows]

[truncated: 1 more sheets: TAIR10]
